# Supplementary material for: Transcriptome Analysis Provides Insights into the Markers of Resting and LPS-Activated Macrophages in Grass Carp (Ctenopharyngodon idella)
Source: Int J Mol Sci. 2018 Nov 12;19(11):3562. doi: 10.3390/ijms19113562 (PMC6274997; doi:10.3390/ijms19113562)
Supplement: Supplementary file 1 [file ijms-19-03562-s001.zip]

Archive with 4 entries (4 files):
- ARRIVE checklist.pdf
- ijms-378862-supplementary.doc
- Supplementary Dataset 1.xlsx
- Supplementary Dataset 2.xlsx
