# Supplementary material for: Transcriptome Analysis Provides Insights into the Markers of Resting and LPS-Activated Macrophages in Grass Carp (Ctenopharyngodon idella)
Source: Int J Mol Sci. 2018 Nov 12;19(11):3562. doi: 10.3390/ijms19113562 (PMC6274997; doi:10.3390/ijms19113562)
Supplement: Supplementary file 1 [file ijms-19-03562-s001.zip › Supplementary Dataset 1.xlsx]

## Sheet: A2-VS-B2_DE_anno
	id	logFC	logCPM	PValue	FDR		GeneSymbol	KO	GO
CCL19a.1	CI01000071_04430037_04431564	3.71311	3.03206	3.75e-06	0.000101386		gi|1025407769|ref|XP_016409752.1| PREDICTED: C-C motif chemokine 3-like 1 [Sinocyclocheilus rhinocerous]	_	_
CCL19a.2	CI01000071_04433656_04434358	6.29043	-0.906103	0.00922396	0.0590301		gi|1024992065|ref|XP_016316196.1| PREDICTED: C-C motif chemokine 3-like [Sinocyclocheilus anshuiensis]	_	_
CCL19b	CI01000304_07352697_07354032	4.48289	1.5197	9.39e-06	0.000221379		gi|1025123304|ref|XP_016413175.1| PREDICTED: C-C motif chemokine 19-like [Sinocyclocheilus rhinocerous]	K05512	_
CCL20a.2	CI01000190_01008838_01011938	-1.26872	-0.112958	0.228158	0.610013		gi|1025237322|ref|XP_016365462.1| PREDICTED: C-C motif chemokine 20-like [Sinocyclocheilus rhinocerous]	_	_
CCL20a.3	CI01000152_02078880_02079973	-0.722213	0.410433	0.479616	0.975188		gi|966699239|gb|KTG31480.1| hypothetical protein cypCar_00050111 [Cyprinus carpio]	K14625	_
CCL20a.4	CI01000152_02066678_02068178	2.01646	0.151888	0.0638717	0.251282		gi|1025108720|ref|XP_016347599.1| PREDICTED: monocyte chemotactic protein 1B-like [Sinocyclocheilus anshuiensis]	_	_
CCL20a.5	CI01000075_00307523_00328194	0.313023	4.1233	0.647538	1		gi|112784983|gb|ABI20737.1| 11-beta-hydroxysteroid dehydrogenase-like protein [Pimephales promelas]	K15680	_
CCL27b	CI01000178_00755806_00757505	-4.32077	2.53901	1.28e-06	4.09e-05		gi|966656475|gb|KTF91329.1| hypothetical protein cypCar_00047041, partial [Cyprinus carpio]	_	_
CCL34a.1	CI01000190_01000659_01005511	10.6398	8.28112	2.85e-24	1.56e-20		gi|966643741|gb|KTF78653.1| hypothetical protein cypCar_00024624 [Cyprinus carpio]	_	_
CCL34b.1	CI01000082_00678125_00678798	7.81013	10.5898	7.12e-19	5.19e-16		gi|1025363389|ref|XP_016395761.1| PREDICTED: C-C motif chemokine 20-like [Sinocyclocheilus rhinocerous]	_	_
CCL34b.12	CI01161994_00000124_00001384	-0.381289	-0.37985	0.840166	1		gi|1025363389|ref|XP_016395761.1| PREDICTED: C-C motif chemokine 20-like [Sinocyclocheilus rhinocerous]	_	_
CCL34b.6	CI01000481_00022476_00023819	-4.55256	-1.82297	0.285714	0.679022		gi|1025363412|ref|XP_016395768.1| PREDICTED: C-C motif chemokine 8-like isoform X2 [Sinocyclocheilus rhinocerous]	_	_
CCL34b.7a	CI01000481_00035354_00035642	7.11242	-0.274373	0.000726851	0.00804769		gi|1025363389|ref|XP_016395761.1| PREDICTED: C-C motif chemokine 20-like [Sinocyclocheilus rhinocerous]	_	_
CCL34b.8	CI01000082_00692849_00695595	8.38206	11.6275	1.25e-20	1.79e-17		gi|966712232|gb|KTG44470.1| hypothetical protein cypCar_00010935, partial [Cyprinus carpio]	_	_
CCL35.2	CI01000113_00332256_00333023	-6.3592	5.20282	5.23e-13	9.28e-11		gi|1020424856|ref|XP_016131376.1| PREDICTED: hemoglobin subunit alpha-like [Sinocyclocheilus grahami]	K13826	_
CCL38.4	CI01000029_01526863_01527414	-0.921156	0.647674	0.348276	0.787601		gi|1025035826|ref|XP_016326222.1| PREDICTED: C-C motif chemokine 13-like [Sinocyclocheilus anshuiensis]	K16596	_
CCL38.6	CI01000029_01533005_01534392	6.29043	-0.906103	0.00922396	0.0590301		gi|1025035834|ref|XP_016326224.1| PREDICTED: C-C motif chemokine 13-like [Sinocyclocheilus anshuiensis]	K16596	_
CCL39.1	CI01000145_00923904_00924471	5.95176	4.283	1.41e-11	1.82e-09		gi|1025242733|ref|XP_016366927.1| PREDICTED: monocyte chemotactic protein 1B-like [Sinocyclocheilus rhinocerous]	K05514	_
CCL39.10	CI01000145_00918882_00919452	10.0458	2.44084	1.58e-10	1.58e-08		gi|1025242733|ref|XP_016366927.1| PREDICTED: monocyte chemotactic protein 1B-like [Sinocyclocheilus rhinocerous]	_	_
CCL39.3	CI01000145_00928144_00928757	8.20182	3.674	5.22e-13	9.28e-11		gi|1025273508|ref|XP_016375254.1| PREDICTED: C-C motif chemokine 13-like [Sinocyclocheilus rhinocerous]	K05514	_
CD109	CI01000029_06453008_06476863	1.71664	-1.03089	0.372947	0.826473		gi|1024994935|ref|XP_016317107.1| PREDICTED: CD109 antigen-like [Sinocyclocheilus anshuiensis]	K06530	_
CD11-1	CI01000365_00126423_00134788	-5.87526	1.64047	3.19e-07	1.24e-05		gi|13365521|dbj|BAB39134.1| CD11-1 [Cyprinus carpio]	_	_
CD11-2	CI01000365_00275086_00325578	-2.93483	7.87906	3.09e-05	0.000606471		gi|13365521|dbj|BAB39134.1| CD11-1 [Cyprinus carpio]	_	_
CD164	CI01000325_08504398_08512325	1.60332	7.24649	0.016932	0.0942098		gi|113680211|ref|NP_001038256.1| sialomucin core protein 24 precursor [Danio rerio]<>gi|141796259|gb|AAI39625.1| CD164 molecule, sialomucin [Danio rerio]	K06546	_
CD180	CI01000059_00691603_00693842	2.72887	2.93584	0.000296192	0.00389825		gi|1025059657|ref|XP_016332684.1| PREDICTED: CD180 antigen-like [Sinocyclocheilus anshuiensis]	K06555	_
CD2	CI01000069_04143761_04147538	1.14943	5.38041	0.086029	0.313111		gi|47199314|emb|CAF88122.1| unnamed protein product, partial [Tetraodon nigroviridis]	K13099	_
CD209	CI01000304_10541900_10546151	-5.64799	3.53968	8.9e-10	7.19e-08		gi|1020546457|ref|XP_016108716.1| PREDICTED: CD209 antigen-like [Sinocyclocheilus grahami]	_	_
CD209-C	CI01000142_00095586_00099091	-4.95215	-1.63211	0.161491	0.47373		gi|1020506575|ref|XP_016092266.1| PREDICTED: CD209 antigen-like protein C [Sinocyclocheilus grahami]	_	_
CD209-D	CI01180000_06027044_06027739	0	-2.62448	1	1		gi|1025086027|ref|XP_016341397.1| PREDICTED: CD209 antigen-like protein D [Sinocyclocheilus anshuiensis]	_	_
CD22	CI01000027_02147653_02152768	-5.45292	9.54886	5.31e-12	7.74e-10		gi|1025348344|ref|XP_016394116.1| PREDICTED: B-cell receptor CD22-like [Sinocyclocheilus rhinocerous]	_	_
CD22-like	CI01000219_00233215_00238585	10.2195	9.21626	9.45e-25	6.2e-21		gi|1020588932|ref|XP_016115745.1| PREDICTED: B-cell receptor CD22-like [Sinocyclocheilus grahami]	K06467	_
CD27	CI01000057_01361967_01364527	-2.39715	1.69186	0.00358121	0.0284767		gi|1025202732|ref|XP_016426543.1| PREDICTED: CD27 antigen-like [Sinocyclocheilus rhinocerous]	_	_
CD276	CI01000017_00722020_00762518	4.3469	2.90118	2.52e-07	1.02e-05		gi|1020482848|ref|XP_016146944.1| PREDICTED: CD276 antigen-like [Sinocyclocheilus grahami]	_	_
CD276 antigen homolog	CI01000015_07123336_07130178	-2.09921	0.439071	0.0287437	0.140595		gi|1025257551|ref|XP_016370949.1| PREDICTED: CD276 antigen homolog [Sinocyclocheilus rhinocerous]	_	_
CD4	CI01000016_05037135_05040030	-1.39947	2.39852	0.0541051	0.225284		gi|255709622|gb|ACU30713.1| CD4-like protein [Ctenopharyngodon idella]	_	_
CD45	CI01000345_01993893_01997542	3.2609	-2.30021	1	1		gi|1025366272|ref|XP_016396527.1| PREDICTED: CD44 antigen-like [Sinocyclocheilus rhinocerous]	_	_
CD48	CI01000343_00067132_00076892	2.48552	8.71918	0.000317551	0.00413459		gi|1020593257|ref|XP_016116581.1| PREDICTED: CD48 antigen-like isoform X1 [Sinocyclocheilus grahami]	_	_
CD5	CI01000049_07671905_07677035	-2.26214	2.17644	0.00330161	0.0265969		gi|1025025462|ref|XP_016323593.1| PREDICTED: T-cell surface glycoprotein CD5-like [Sinocyclocheilus anshuiensis]	_	_
CD59	CI01000026_10788054_10788652	-3.99802	-2.0435	0.52381	0.975188		gi|1020507292|ref|XP_016092650.1| PREDICTED: CD59 glycoprotein-like [Sinocyclocheilus grahami]<>gi|1020507294|ref|XP_016092651.1| PREDICTED: CD59 glycoprotein-like [Sinocyclocheilus grahami]<>gi|1024959197|ref|XP_016300589.1| PREDICTED: CD59 glycoprotein-like [Sinocyclocheilus anshuiensis]<>gi|1024959199|ref|XP_016300590.1| PREDICTED: CD59 glycoprotein-like [Sinocyclocheilus anshuiensis]	K04008	_
CD6	CI01000355_00945940_00952037	-3.20207	5.28207	9.71e-06	0.000226323		gi|1025296477|ref|XP_016380046.1| PREDICTED: T-cell differentiation antigen CD6-like [Sinocyclocheilus rhinocerous]	_	_
CD63	CI01000001_13329841_13334948	2.37539	10.7318	0.000543499	0.00637566		gi|41054707|ref|NP_955837.1| CD63 antigen [Danio rerio]<>gi|34785131|gb|AAH56698.1| Cd63 antigen [Danio rerio]<>gi|39794617|gb|AAH64300.1| Cd63 antigen [Danio rerio]	K06497	cellular_component:membrane(GO:0016020);biological_process:hatching(GO:0035188)
CD68	CI01000344_01208746_01214936	1.31072	8.44156	0.0487368	0.208189		gi|1020493232|ref|XP_016085113.1| PREDICTED: macrosialin-like [Sinocyclocheilus grahami]	_	_
CD69	CI01092720_00000024_00000324	-5.26473	-1.4639	0.0942029	0.327911		gi|1020592990|ref|XP_016116534.1| PREDICTED: early activation antigen CD69-like [Sinocyclocheilus grahami]	_	_
CD81	CI01000002_01546448_01547246	-2.05209	2.0895	0.00754926	0.0508517		gi|1020537651|ref|XP_016106926.1| PREDICTED: CD81 protein-like [Sinocyclocheilus grahami]	_	_
CD82	CI01000026_02722558_02725907	0.766075	1.90057	0.317704	0.736326		gi|1025079697|ref|XP_016339672.1| PREDICTED: CD82 antigen-like [Sinocyclocheilus anshuiensis]	K06509	_
CD9	CI01000013_11573209_11581594	-0.626628	3.43445	0.366496	0.819019		gi|1020402476|ref|XP_016099069.1| PREDICTED: CD9 antigen-like [Sinocyclocheilus grahami]	K06460	cellular_component:integral component of membrane(GO:0016021)
CD99	CI01000049_03093994_03098141	1.90816	5.22713	0.00534186	0.0389579		gi|1025150368|ref|XP_016416420.1| PREDICTED: CD99 antigen-like [Sinocyclocheilus rhinocerous]	K06520	_
CXCL11.1a	CI01000039_04058417_04059141	6.96084	5.08931	2.59e-14	6.58e-12		gi|1020502222|ref|XP_016089939.1| PREDICTED: C-X-C motif chemokine 10-like [Sinocyclocheilus grahami]	_	_
CXCL11.1b	CI01000039_04065787_04066284	8.10191	6.41207	7.34e-18	4.08e-15		gi|1025299535|ref|XP_016380882.1| PREDICTED: C-X-C motif chemokine 10-like [Sinocyclocheilus rhinocerous]	_	_
CXCL11.3	CI01000504_00017990_00018707	7.67947	5.01627	5.33e-15	1.48e-12		gi|1025037662|ref|XP_016326714.1| PREDICTED: C-X-C motif chemokine 11-like [Sinocyclocheilus anshuiensis]	_	_
CXCL11.4	CI01000504_00025193_00026393	2.91768	5.12349	4.63e-05	0.000844493		gi|1025037654|ref|XP_016326711.1| PREDICTED: C-X-C motif chemokine 10-like [Sinocyclocheilus anshuiensis]	_	_
CXCL11.5	CI01000039_04062068_04062375	7.57949	3.05868	3e-11	3.63e-09		gi|1020504818|ref|XP_016091335.1| PREDICTED: C-X-C motif chemokine 11-like [Sinocyclocheilus grahami]<>gi|1025037666|ref|XP_016326715.1| PREDICTED: C-X-C motif chemokine 11-like [Sinocyclocheilus anshuiensis]	_	_
CXCL11.6	CI01000039_04070151_04075216	7.67498	6.67812	3.84e-17	1.8e-14		gi|1025299575|ref|XP_016380890.1| PREDICTED: C-X-C motif chemokine 11-like [Sinocyclocheilus rhinocerous]	_	_
CXCL11.7	CI01000039_04078795_04079273	4.65853	2.62839	1.13e-07	4.99e-06		gi|1025037662|ref|XP_016326714.1| PREDICTED: C-X-C motif chemokine 11-like [Sinocyclocheilus anshuiensis]	_	_
CXCL13	CI01000039_06179859_06180838	5.01157	7.81304	1.15e-10	1.19e-08		gi|1020546110|ref|XP_016108645.1| PREDICTED: C-X-C motif chemokine 13-like [Sinocyclocheilus grahami]	_	_
CXCL18a.1	CI01000012_09068458_09070536	8.0683	6.18945	1.4e-17	7.39e-15		gi|1025023796|ref|XP_016323213.1| PREDICTED: C-X-C motif chemokine 10-like [Sinocyclocheilus anshuiensis]	_	_
CXCL19	CI01000343_00865224_00865808	6.94696	6.49765	2.63e-15	8.54e-13		gi|966646009|gb|KTF80921.1| hypothetical protein cypCar_00030040 [Cyprinus carpio]	_	_
CXCL20a	CI01000039_04048342_04049635	10.7893	3.175	1.33e-12	2.21e-10		gi|1020502220|ref|XP_016089938.1| PREDICTED: C-X-C motif chemokine 10-like [Sinocyclocheilus grahami]	_	_
CXCL32b.1	CI01000082_00715043_00717473	-1.29166	-1.62802	0.658385	1		gi|1025147298|ref|XP_016354542.1| PREDICTED: uncharacterized protein LOC107698125 [Sinocyclocheilus anshuiensis]	_	_
CXCL32b.2	CI01000082_00711974_00712758	2.44609	7.03943	0.000404519	0.00502752		gi|1025363428|ref|XP_016395772.1| PREDICTED: monocyte chemotactic protein 1B-like [Sinocyclocheilus rhinocerous]	_	_
CXCL8a(IL-8)	CI01000300_03901275_03902800	-1.23027	7.74006	0.0640964	0.251503		gi|343198397|gb|AEM05971.1| interleukin-8 [Ctenopharyngodon idella]<>gi|354720736|gb|AER38413.1| interleukin-8 [Ctenopharyngodon idella]	_	_
CXCL8b.1	CI01159682_00000241_00000722	9.07894	6.01068	1.72e-18	1.15e-15		gi|966646950|gb|KTF81860.1| hypothetical protein cypCar_00047570 [Cyprinus carpio]	_	_
CXCL8b.3	CI01000343_00878864_00879542	0.433462	6.37225	0.511918	0.975188		gi|1020505272|ref|XP_016091574.1| PREDICTED: interleukin-8-like [Sinocyclocheilus grahami]	_	_
CXCL-like	CI01000012_09071892_09073410	12.9601	5.33744	6.22e-19	4.75e-16		gi|1020530358|ref|XP_016104897.1| PREDICTED: C-X-C motif chemokine 9-like [Sinocyclocheilus grahami]	_	_
IL-1β	CI01054110_00000115_00000277	-2.17247	2.39631	0.00467607	0.0349116		gi|387864279|gb|AER38414.2| interleukin-1 beta [Ctenopharyngodon idella]<>gi|387864328|gb|AFK09601.1| interleukin-1 beta [Ctenopharyngodon idella]	_	biological_process:defense response to bacterium(GO:0042742);cellular_component:extracellular space(GO:0005615);biological_process:inflammatory response(GO:0006954);biological_process:regulation of NIK/NF-kappaB signaling(GO:1901222);molecular_function:cytokine activity(GO:0005125);molecular_function:interleukin-1 receptor binding(GO:0005149);biological_process:response to arsenic-containing subs…
IL-6	CI01000319_02211556_02214522	1.68477	4.37535	0.014263	0.0825219		gi|563401124|gb|AHB51767.1| interleukin-6 [Ctenopharyngodon idella]	_	_
iNOS	CI01000093_00515565_00527271	3.05168	5.96649	1.91e-05	0.000400943		gi|662858606|gb|AIE77026.1| inducible nitric oxide synthase [Megalobrama amblycephala](团头鲂)	K13241	_
M-CSFR	CI01000221_00092934_00109977	5.31816	7.88366	1.63e-11	2.08e-09		gi|545604977|gb|AGW43285.1| macrophage colony stimulating factor receptor [Ctenopharyngodon idella]	K05090	_
XCL32a.1	CI01000190_00989936_00990597	4.23974	1.68173	1.09e-05	0.0002508		gi|1025342949|ref|XP_016392661.1| PREDICTED: monocyte chemotactic protein 1B-like [Sinocyclocheilus rhinocerous]	_	_
XCL32a.2	CI01000190_00993478_00995284	0	-2.62448	1	1		gi|1025342949|ref|XP_016392661.1| PREDICTED: monocyte chemotactic protein 1B-like [Sinocyclocheilus rhinocerous]	_	_
XCL32a.3	CI01000190_01428225_01433040	9.8584	2.25692	5.07e-10	4.4e-08		gi|597758897|ref|XP_007241142.1| PREDICTED: uncharacterized protein LOC103031272 [Astyanax mexicanus]	_	_
	id	logFC	logCPM	PValue	FDR		GeneSymbol	KO	GO
	CI01000304_04269487_04273391	12.4061	10.5213	1.4e-30	4.58e-26		gi|1020517037|ref|XP_016097820.1| PREDICTED: dentin sialophosphoprotein-like [Sinocyclocheilus grahami]<>gi|1020517039|ref|XP_016097821.1| PREDICTED: dentin sialophosphoprotein-like [Sinocyclocheilus grahami]	_	_
	CI01000095_01821436_01824400	11.7169	9.35769	1.66e-27	2.72e-23		gi|1024939541|ref|XP_016334987.1| PREDICTED: collagenase 3 [Sinocyclocheilus anshuiensis]	K07994	molecular_function:metalloendopeptidase activity(GO:0004222);biological_process:proteolysis(GO:0006508);molecular_function:calcium ion binding(GO:0005509);cellular_component:extracellular matrix(GO:0031012);molecular_function:zinc ion binding(GO:0008270)
	CI01000030_00937645_00942188	11.5331	9.17397	5.91e-27	6.46e-23		gi|224830248|gb|ACN66300.1| lipoprotein lipase [Ctenopharyngodon idella]	K01059	_
	CI01000105_00307035_00367903	10.6652	8.78116	2.39e-25	1.96e-21		gi|1020462159|ref|XP_016135891.1| PREDICTED: cell migration-inducing and hyaluronan-binding protein-like [Sinocyclocheilus grahami]	K19031	_
	CI01000039_06199595_06200036	10.1232	8.5961	4.69e-24	2.2e-20		gi|1020481466|ref|XP_016146204.1| PREDICTED: C-X-C motif chemokine 10-like [Sinocyclocheilus grahami]	_	_
	CI01000339_05863897_05897316	10.2628	8.16123	6.53e-24	2.68e-20		gi|1025297192|ref|XP_016380240.1| PREDICTED: pleckstrin homology-like domain family B member 1 isoform X1 [Sinocyclocheilus rhinocerous]	_	_
	CI01000047_06086322_06106616	14.4155	6.79162	2.82e-23	1.03e-19		gi|765170806|ref|XP_011471803.1| PREDICTED: anthrax toxin receptor 1-like [Oryzias latipes]	_	_
	CI01000304_06092291_06110594	11.0033	7.37795	3.23e-23	1.06e-19		gi|1020472561|ref|XP_016141447.1| PREDICTED: integrin alpha-2 [Sinocyclocheilus grahami]	K06481	_
	CI01000030_07548087_07549591	10.5959	7.52522	5.05e-23	1.51e-19		gi|1025210044|ref|XP_016428485.1| PREDICTED: uncharacterized protein LOC107756023 isoform X2 [Sinocyclocheilus rhinocerous]	_	_
	CI01000000_07386332_07396038	10.4593	7.38881	1.3e-22	3.54e-19		gi|966649876|gb|KTF84786.1| hypothetical protein cypCar_00010325 [Cyprinus carpio]	K13869	_
	CI01104769_00000031_00000583	14.1715	6.54775	1.51e-22	3.64e-19		gi|966709900|gb|KTG42138.1| hypothetical protein cypCar_00037640, partial [Cyprinus carpio]	_	_
	CI01000105_00289265_00293532	14.1681	6.54439	1.55e-22	3.64e-19		gi|1024972629|ref|XP_016307794.1| PREDICTED: cell migration-inducing and hyaluronan-binding protein-like, partial [Sinocyclocheilus anshuiensis]	_	_
	CI01000027_02455787_02458435	9.39105	8.49471	2.46e-22	5.38e-19		gi|1024922932|ref|XP_016339249.1| PREDICTED: dendritic cell-specific transmembrane protein [Sinocyclocheilus anshuiensis]	_	_
	CI01000082_03460478_03466764	9.32947	8.32738	4.42e-22	9.07e-19		gi|31076619|sp|Q8UWA5.3|CAH2_TRIHK RecName: Full=Carbonic anhydrase 2; AltName: Full=Carbonate dehydratase II; AltName: Full=Carbonic anhydrase II; Short=CA-II<>gi|18147600|dbj|BAB83090.1| carbonic anhydrase 2 [Tribolodon hakonensis]	K18245	cellular_component:cytoplasm(GO:0005737);biological_process:one-carbon metabolic process(GO:0006730);molecular_function:zinc ion binding(GO:0008270);molecular_function:carbonate dehydratase activity(GO:0004089)
	CI01000116_00761732_00764310	11.1425	6.60489	1.12e-21	2.16e-18		gi|966702450|gb|KTG34691.1| hypothetical protein cypCar_00028826 [Cyprinus carpio]	K16661	_
	CI01000071_00450392_00503389	9.20015	7.95999	1.6e-21	2.81e-18		gi|1025173438|ref|XP_016358279.1| PREDICTED: rho guanine nucleotide exchange factor 28 isoform X3 [Sinocyclocheilus anshuiensis]	_	_
	CI01000197_00019798_00024212	9.19813	7.95797	1.63e-21	2.81e-18		gi|1025229480|ref|XP_016431875.1| PREDICTED: collagenase 3-like [Sinocyclocheilus rhinocerous]	_	molecular_function:metalloendopeptidase activity(GO:0004222);biological_process:proteolysis(GO:0006508);molecular_function:calcium ion binding(GO:0005509);cellular_component:extracellular matrix(GO:0031012);molecular_function:zinc ion binding(GO:0008270)
	CI01000043_02033302_02075904	9.84291	7.17258	2.01e-21	3.3e-18		gi|1024964510|ref|XP_016303413.1| PREDICTED: inactive ubiquitin carboxyl-terminal hydrolase 53-like [Sinocyclocheilus anshuiensis]	_	_
	CI01000004_16037124_16044487	8.74426	8.67961	5.49e-21	8.59e-18		gi|966705235|gb|KTG37476.1| hypothetical protein cypCar_00008330 [Cyprinus carpio]	K07763	_
	CI01000005_05198676_05204140	13.6412	6.01784	5.82e-21	8.68e-18		gi|1025306151|ref|XP_016382691.1| PREDICTED: trypsin-2-like [Sinocyclocheilus rhinocerous]	_	_
	CI01000046_04841558_04852685	8.559	8.65749	1.75e-20	2.4e-17		gi|1025132182|ref|XP_016405027.1| PREDICTED: mucin-2-like [Sinocyclocheilus rhinocerous]	_	_
	CI01000072_00208491_00215135	10.0756	6.45116	1.93e-20	2.53e-17		gi|1025108508|ref|XP_016347546.1| PREDICTED: LOW QUALITY PROTEIN: probable polyketide synthase 16 [Sinocyclocheilus anshuiensis]	_	_
	CI01000016_03060171_03060612	8.77522	7.77427	2.02e-20	2.55e-17		gi|966703255|gb|KTG35496.1| hypothetical protein cypCar_00025295 [Cyprinus carpio]	_	_
	CI01000012_01601665_01604244	8.99289	7.11108	2.46e-20	2.99e-17		gi|1025154516|ref|XP_016417189.1| PREDICTED: cytochrome P450 1B1-like [Sinocyclocheilus rhinocerous]	K07410	_
	CI01000000_11661528_11696310	10.6862	6.14912	2.58e-20	3.02e-17		gi|6066287|gb|AAF03237.1| flk1 protein [Danio rerio]	K05096	biological_process:thyroid gland development(GO:0030878);biological_process:angiogenesis(GO:0001525);biological_process:peptidyl-tyrosine phosphorylation(GO:0018108);biological_process:artery morphogenesis(GO:0048844);biological_process:vascular endothelial growth factor receptor signaling pathway(GO:0048010);molecular_function:ATP binding(GO:0005524);biological_process:embryonic heart tube devel…
	CI01000026_00720139_00726461	9.59592	6.52654	4.96e-20	5.62e-17		gi|1025103941|ref|XP_016346278.1| PREDICTED: matrix metalloproteinase-14-like [Sinocyclocheilus anshuiensis]	K07763	biological_process:anterior/posterior axis specification(GO:0009948);biological_process:response to hypoxia(GO:0001666);biological_process:cartilage development(GO:0051216);molecular_function:zinc ion binding(GO:0008270);molecular_function:calcium ion binding(GO:0005509);molecular_function:metalloendopeptidase activity(GO:0004222);biological_process:proteolysis(GO:0006508);biological_process:esta…
	CI01000299_00169255_00170695	9.91139	6.28723	5.98e-20	6.54e-17		gi|1024950456|ref|XP_016295932.1| PREDICTED: 2-oxoglutarate receptor 1-like [Sinocyclocheilus anshuiensis]	K08419	_
	CI01000030_05834662_05837361	13.2932	5.67009	6.36e-20	6.74e-17		gi|1025281352|ref|XP_016377375.1| PREDICTED: claudin-1-like isoform X2 [Sinocyclocheilus rhinocerous]	_	_
	CI01000029_05429198_05430689	-8.12499	10.0856	1e-19	1.03e-16		gi|14269493|gb|AAK58088.1|AF380155_1 c-Fos [Ctenopharyngodon idella]<>gi|83267792|gb|ABB99429.1| c-Fos protein [Ctenopharyngodon idella]	K04379	molecular_function:double-stranded DNA binding(GO:0003690)
	CI01062149_00000310_00000668	9.82257	6.19856	1.1e-19	1.09e-16		gi|169234900|ref|NP_001108532.1| chemokine (C-X-C motif) ligand 18b precursor [Danio rerio]<>gi|164604925|dbj|BAF98266.1| chemokine CXCL-C1c [Danio rerio]	_	_
	CI01000059_09990989_09995182	8.12508	9.1422	1.5e-19	1.45e-16		gi|57525610|ref|NP_001003629.1| regulator of G-protein signaling 3 [Danio rerio]<>gi|1040689790|ref|XP_017211557.1| PREDICTED: regulator of G-protein signaling 3 isoform X6 [Danio rerio]<>gi|50418138|gb|AAH78194.1| Zgc:100933 [Danio rerio]	K16449	biological_process:somite development(GO:0061053);cellular_component:cytoplasm(GO:0005737);biological_process:negative regulation of Wnt signaling pathway, calcium modulating pathway(GO:0045812);molecular_function:GTPase activator activity(GO:0005096);biological_process:positive regulation of GTPase activity(GO:0043547);cellular_component:plasma membrane(GO:0005886);biological_process:termination…
	CI01000171_00809393_00816099	-8.77382	7.08853	1.58e-19	1.48e-16		gi|1024921636|ref|XP_016311951.1| PREDICTED: diamine acetyltransferase 1-like isoform X1 [Sinocyclocheilus anshuiensis]	K00657	_
	CI01000092_04997617_05000398	8.34166	7.88469	1.89e-19	1.73e-16		gi|589298641|gb|AHK80892.1| IL-12 p35 [Ctenopharyngodon idella]	_	_
	CI01000012_12159352_12162539	8.05629	9.62994	1.98e-19	1.75e-16		gi|1025340924|ref|XP_016392122.1| PREDICTED: urokinase-type plasminogen activator-like [Sinocyclocheilus rhinocerous]	_	_
	CI01000022_00632797_00636869	8.05787	8.55838	3.37e-19	2.88e-16		gi|1040692003|ref|XP_017211942.1| PREDICTED: galectin-1 isoform X1 [Danio rerio]	_	molecular_function:carbohydrate binding(GO:0030246);molecular_function:galactoside binding(GO:0016936);biological_process:sprouting angiogenesis(GO:0002040)
	CI01000000_10899343_10909936	9.65672	6.03302	3.42e-19	2.88e-16		gi|1024970208|ref|XP_016306481.1| PREDICTED: adhesion G-protein coupled receptor G2-like [Sinocyclocheilus anshuiensis]	K08455	_
	CI01000028_07010842_07012858	8.29735	7.59453	3.51e-19	2.88e-16		gi|1025170827|ref|XP_016357797.1| PREDICTED: trypsin-3-like [Sinocyclocheilus anshuiensis]	_	_
	CI01000050_04442645_04542984	8.30649	7.51135	3.74e-19	3e-16		gi|683940169|ref|XP_009098501.1| PREDICTED: bone morphogenetic protein 1 [Serinus canaria]	K05502	_
	CI01000161_03048260_03059532	7.92478	9.6727	4.35e-19	3.4e-16		gi|1020478753|ref|XP_016144757.1| PREDICTED: uncharacterized protein LOC107598027 isoform X1 [Sinocyclocheilus grahami]	_	_
	CI01000347_00712979_00723572	8.44949	6.75837	6.76e-19	5.04e-16		gi|1020511454|ref|XP_016094854.1| PREDICTED: osteoclast stimulatory transmembrane protein [Sinocyclocheilus grahami]	_	_
	CI01000010_09535652_09553069	-7.8966	9.1119	7.29e-19	5.2e-16		gi|966713805|gb|KTG46043.1| hypothetical protein cypCar_00046201 [Cyprinus carpio]	_	_
	CI01000310_03699595_03709303	-8.43755	6.94311	9.07e-19	6.33e-16		gi|966712720|gb|KTG44958.1| hypothetical protein cypCar_00016617 [Cyprinus carpio]	K09592	_
	CI01000012_09084147_09092221	8.11894	7.58532	9.6e-19	6.56e-16		gi|1024992219|ref|XP_016316279.1| PREDICTED: ras association domain-containing protein 4-like isoform X1 [Sinocyclocheilus anshuiensis]	K09851	_
	CI01000004_00407881_00409797	12.8026	5.18015	1.83e-18	1.2e-15		gi|1025062643|ref|XP_016333492.1| PREDICTED: sorting nexin-16-like [Sinocyclocheilus anshuiensis]	_	_
	CI01000113_00324040_00324756	-7.74451	9.16285	1.96e-18	1.26e-15		gi|22135554|gb|AAM93257.1| alpha globin [Ctenopharyngodon idella]	K13826	_
	CI01000050_03916668_03927175	8.52033	6.16539	2.08e-18	1.31e-15		gi|1025258352|ref|XP_016371160.1| PREDICTED: indoleamine 2,3-dioxygenase 2-like isoform X2 [Sinocyclocheilus rhinocerous]	K00463	_
	CI01000010_08642328_08681400	9.03434	5.96619	2.34e-18	1.45e-15		gi|1025386457|ref|XP_016401969.1| PREDICTED: sodium- and chloride-dependent creatine transporter 1-like isoform X1 [Sinocyclocheilus rhinocerous]<>gi|1025386460|ref|XP_016401970.1| PREDICTED: sodium- and chloride-dependent creatine transporter 1-like isoform X1 [Sinocyclocheilus rhinocerous]	K05039	cellular_component:integral component of membrane(GO:0016021);molecular_function:neurotransmitter:sodium symporter activity(GO:0005328);biological_process:neurotransmitter transport(GO:0006836)
	CI01000345_00736993_00752689	-7.93436	7.5171	2.42e-18	1.47e-15		gi|966678770|gb|KTG12027.1| hypothetical protein cypCar_00015157 [Cyprinus carpio]	K02633	_
	CI01000047_04012371_04020979	9.32929	5.70631	3.23e-18	1.93e-15		gi|1025307644|ref|XP_016383104.1| PREDICTED: fructose-bisphosphate aldolase A-like [Sinocyclocheilus rhinocerous]<>gi|1025307648|ref|XP_016383105.1| PREDICTED: fructose-bisphosphate aldolase A-like [Sinocyclocheilus rhinocerous]	K01623	_
	CI01000009_10376105_10382009	8.71216	6.04424	4.75e-18	2.78e-15		gi|966646793|gb|KTF81703.1| hypothetical protein cypCar_00009918, partial [Cyprinus carpio]	K01852	_
	CI01000029_05444811_05447063	-7.61858	8.59993	5.28e-18	3.04e-15		gi|1025071505|ref|XP_016337403.1| PREDICTED: jun dimerization protein 2 [Sinocyclocheilus anshuiensis]<>gi|1025071509|ref|XP_016337404.1| PREDICTED: jun dimerization protein 2 [Sinocyclocheilus anshuiensis]	_	_
	CI01000343_00276188_00284420	9.87141	5.3357	6.86e-18	3.88e-15		gi|1025141598|ref|XP_016414874.1| PREDICTED: Fc receptor-like protein 5 [Sinocyclocheilus rhinocerous]	_	_
	CI01000016_03921124_03930996	7.51082	8.68506	9.97e-18	5.45e-15		gi|966648709|gb|KTF83619.1| hypothetical protein cypCar_00016748 [Cyprinus carpio]	_	_
	CI01000325_09518831_09533382	-8.00351	6.67874	1.12e-17	6.01e-15		gi|1025338441|ref|XP_016391449.1| PREDICTED: P-selectin-like [Sinocyclocheilus rhinocerous]	_	_
	CI01000040_05230946_05238111	7.48778	8.20704	1.56e-17	8.15e-15		gi|1025412992|ref|XP_016411167.1| PREDICTED: interleukin-12 subunit beta-like [Sinocyclocheilus rhinocerous]	_	_
	CI01000016_03062846_03063013	8.66978	5.60275	2.83e-17	1.45e-14		gi|1020436712|ref|XP_016132113.1| PREDICTED: ras-related protein Rab-39B-like isoform X1 [Sinocyclocheilus grahami]	_	_
	CI01000004_12719753_12721562	-12.3929	4.78216	2.93e-17	1.48e-14		gi|1025399514|ref|XP_016407529.1| PREDICTED: zinc finger and BTB domain-containing protein 18-like [Sinocyclocheilus rhinocerous]	K17846	_
	CI01077938_00000186_00001413	8.12739	5.77397	3.06e-17	1.52e-14		gi|966645881|gb|KTF80793.1| hypothetical protein cypCar_00012875, partial [Cyprinus carpio]	_	_
	CI01000177_00081319_00089885	12.383	4.76132	3.15e-17	1.54e-14		gi|1024946935|ref|XP_016362545.1| PREDICTED: RILP-like protein 1 isoform X4 [Sinocyclocheilus anshuiensis]	_	_
	CI01000016_09788926_09791625	7.37311	8.09305	3.43e-17	1.65e-14		gi|1025079285|ref|XP_016339559.1| PREDICTED: syndecan-2 [Sinocyclocheilus anshuiensis]	_	_
	CI01000028_07124749_07145384	9.61835	5.08328	3.82e-17	1.8e-14		gi|676266127|gb|KFO22131.1| Cationic trypsin-3 [Fukomys damarensis]	_	biological_process:single-organism process(GO:0044699);molecular_function:hydrolase activity(GO:0016787)
	CI01000113_00254945_00255661	-7.2473	9.05898	4.69e-17	2.17e-14		gi|22135554|gb|AAM93257.1| alpha globin [Ctenopharyngodon idella]	K13826	_
	CI01000013_00348247_00352162	-7.21371	9.31789	5.15e-17	2.35e-14		gi|1020506936|ref|XP_016092461.1| PREDICTED: protein fosB-like [Sinocyclocheilus grahami]	K09029	_
	CI01000312_00675900_00682369	7.50479	7.05151	5.88e-17	2.64e-14		gi|1025381805|ref|XP_016400704.1| PREDICTED: carbohydrate sulfotransferase 15-like [Sinocyclocheilus rhinocerous]	K08106	_
	CI01000113_00283931_00284691	-8.004	6.10524	6.16e-17	2.73e-14		gi|1020424856|ref|XP_016131376.1| PREDICTED: hemoglobin subunit alpha-like [Sinocyclocheilus grahami]	K13826	_
	CI01000319_00143560_00150809	7.78167	6.09333	6.53e-17	2.86e-14		gi|1025265129|ref|XP_016372991.1| PREDICTED: lanosterol 14-alpha demethylase isoform X1 [Sinocyclocheilus rhinocerous]<>gi|1025265133|ref|XP_016372992.1| PREDICTED: lanosterol 14-alpha demethylase isoform X2 [Sinocyclocheilus rhinocerous]	_	molecular_function:heme binding(GO:0020037);molecular_function:oxidoreductase activity, acting on paired donors, with incorporation or reduction of molecular oxygen(GO:0016705);molecular_function:monooxygenase activity(GO:0004497);molecular_function:iron ion binding(GO:0005506);biological_process:methylation(GO:0032259);molecular_function:electron carrier activity(GO:0009055);biological_process:o…
	CI01000300_04581207_04605807	9.45747	4.92288	1.14e-16	4.93e-14		gi|1025412216|ref|XP_016410948.1| PREDICTED: rho GTPase-activating protein 7-like isoform X1 [Sinocyclocheilus rhinocerous]	_	_
	CI01000030_10134835_10135293	-7.22146	7.80266	1.29e-16	5.49e-14		gi|1020592889|ref|XP_016116511.1| PREDICTED: ribonuclease-like 3 [Sinocyclocheilus grahami]	_	_
	CI01000271_00070585_00084314	-7.64303	6.32088	1.31e-16	5.52e-14		gi|1025208397|ref|XP_016428050.1| PREDICTED: sucrase-isomaltase, intestinal-like [Sinocyclocheilus rhinocerous]	K12047	_
	CI01000095_02399217_02399587	8.43527	5.36912	1.39e-16	5.76e-14		gi|67459912|ref|NP_001019992.1| lymphotoxin alpha [Danio rerio]<>gi|688588630|ref|XP_009290076.1| PREDICTED: lymphotoxin alpha isoform X1 [Danio rerio]<>gi|66391031|dbj|BAD98731.1| hypothetical protein [Danio rerio]	_	biological_process:response to exogenous dsRNA(GO:0043330);biological_process:response to lipopolysaccharide(GO:0032496)
	CI01000301_00723145_00732453	-7.51933	6.48348	1.49e-16	6.1e-14		gi|966653168|gb|KTF88070.1| hypothetical protein cypCar_00003267 [Cyprinus carpio]	_	_
	CI01000065_03944604_03949933	-9.16965	4.82169	2.42e-16	9.8e-14		gi|528474210|ref|XP_001340716.5| PREDICTED: zinc finger BED domain-containing protein 4-like [Danio rerio]	_	_
	CI01000023_00176579_00179918	7.80751	5.45569	2.69e-16	1.08e-13		gi|1020596967|ref|XP_016117292.1| PREDICTED: complement C1q tumor necrosis factor-related protein 1-like [Sinocyclocheilus grahami]	K19470	_
	CI01000030_11168935_11171909	7.7945	5.44276	2.95e-16	1.16e-13		gi|1024947663|ref|XP_016362921.1| PREDICTED: uncharacterized protein LOC107704499 [Sinocyclocheilus anshuiensis]	_	_
	CI01000169_00588553_00589817	7.27641	6.74716	3.07e-16	1.2e-13		gi|855695337|gb|AKN90080.1| interleukin-2a [Cyprinus carpio carpio]	_	_
	CI01000030_07521446_07540249	7.07083	7.17647	4.74e-16	1.83e-13		gi|922900791|gb|ALA99928.1| insulin receptor b [Ctenopharyngodon idella]	K04527	_
	CI01000113_00285871_00286497	-7.15808	6.9055	5.44e-16	2.08e-13		gi|295314960|gb|ADF97630.1| hemoglobin beta chain [Hypophthalmichthys molitrix]	K13825	_
	CI01000066_01110448_01145292	11.9541	4.3335	5.8e-16	2.19e-13		gi|528476034|ref|XP_005164640.1| PREDICTED: SLIT-ROBO Rho GTPase-activating protein 1 isoform X1 [Danio rerio]<>gi|213626327|gb|AAI71580.1| Si:ch211-125a15.2 protein [Danio rerio]	K07526	_
	CI01000004_08200962_08208539	8.55951	4.93909	6.11e-16	2.28e-13		gi|1020395138|ref|XP_016127233.1| PREDICTED: serine/threonine-protein phosphatase 2A regulatory subunit B'' subunit alpha [Sinocyclocheilus grahami]	K11583	_
	CI01000113_00326077_00326875	-6.89805	8.09263	6.97e-16	2.57e-13		gi|22135546|gb|AAM93253.1| beta globin [Ctenopharyngodon idella]	K13825	biological_process:oxygen transport(GO:0015671);molecular_function:oxygen transporter activity(GO:0005344);cellular_component:hemoglobin complex(GO:0005833);molecular_function:iron ion binding(GO:0005506);molecular_function:heme binding(GO:0020037);biological_process:response to hypoxia(GO:0001666);molecular_function:oxygen binding(GO:0019825)
	CI01000327_02453419_02506578	7.01455	7.06844	7.21e-16	2.63e-13		gi|1025334988|ref|XP_016390552.1| PREDICTED: sialic acid-binding Ig-like lectin 12 [Sinocyclocheilus rhinocerous]	_	_
	CI01000072_00270378_00272531	11.8639	4.24362	1.07e-15	3.84e-13			_	_
	CI01000004_08177656_08183324	11.8505	4.23031	1.16e-15	4.13e-13		gi|1025376722|ref|XP_016399353.1| PREDICTED: serine/threonine-protein phosphatase 2A regulatory subunit B'' subunit alpha-like [Sinocyclocheilus rhinocerous]	K11583	_
	CI01000001_10093069_10104108	9.09349	4.56022	1.34e-15	4.73e-13		gi|597789061|ref|XP_007257932.1| PREDICTED: rho-related GTP-binding protein Rho6 [Astyanax mexicanus]	K07531	molecular_function:GTP binding(GO:0005525);cellular_component:intracellular(GO:0005622);cellular_component:membrane(GO:0016020);biological_process:small GTPase mediated signal transduction(GO:0007264)
	CI01000339_07502046_07505266	6.93318	6.87732	1.36e-15	4.73e-13		gi|1025114853|ref|XP_016348863.1| PREDICTED: dispanin subfamily A member 2b-like [Sinocyclocheilus anshuiensis]	_	_
	CI01000001_08581266_08604666	9.08545	4.55222	1.41e-15	4.87e-13		gi|938072131|gb|KPP70246.1| hypothetical protein Z043_110939 [Scleropages formosus]	K05103	_
	CI01000049_06959809_06974348	11.7854	4.16536	1.78e-15	6.09e-13		gi|1020512049|ref|XP_016095167.1| PREDICTED: von Willebrand factor A domain-containing protein 7-like [Sinocyclocheilus grahami]	_	_
	CI01000001_07565885_07567962	-7.14927	6.1169	1.84e-15	6.22e-13		gi|1020467300|ref|XP_016138638.1| PREDICTED: carbonic anhydrase 6-like [Sinocyclocheilus grahami]	K01672	_
	CI01000299_05466693_05471714	8.39423	4.77458	1.86e-15	6.22e-13		gi|1025346212|ref|XP_016393541.1| PREDICTED: A disintegrin and metalloproteinase with thrombospondin motifs 1 [Sinocyclocheilus rhinocerous]	K08617	_
	CI01000012_09894361_09922003	6.70353	8.2671	2.08e-15	6.89e-13		gi|1025086074|ref|XP_016341408.1| PREDICTED: myoferlin-like isoform X2 [Sinocyclocheilus anshuiensis]	K18261	_
	CI01000057_00956994_00965947	-7.37268	5.69719	2.26e-15	7.42e-13		gi|966640230|gb|KTF75144.1| hypothetical protein cypCar_00041744 [Cyprinus carpio]	K03728	_
	CI01000325_05531464_05543064	8.98248	4.4497	2.84e-15	9.14e-13		gi|1020395462|ref|XP_016128993.1| PREDICTED: inositol-tetrakisphosphate 1-kinase-like isoform X1 [Sinocyclocheilus grahami]<>gi|1025313834|ref|XP_016384775.1| PREDICTED: inositol-tetrakisphosphate 1-kinase-like [Sinocyclocheilus rhinocerous]	K00913	_
	CI01000012_05988471_06021245	7.06296	5.95599	2.96e-15	9.44e-13		gi|1025232631|ref|XP_016364173.1| PREDICTED: protein jagged-1 isoform X1 [Sinocyclocheilus rhinocerous]<>gi|1025232635|ref|XP_016364174.1| PREDICTED: protein jagged-1 isoform X2 [Sinocyclocheilus rhinocerous]	K06052	biological_process:thyroid gland development(GO:0030878);molecular_function:calcium ion binding(GO:0005509);cellular_component:integral component of membrane(GO:0016021);biological_process:face morphogenesis(GO:0060325);biological_process:liver development(GO:0001889);biological_process:otolith morphogenesis(GO:0032474);biological_process:dorsal/ventral pattern formation(GO:0009953);biological_pr…
	CI01000197_00014204_00017228	6.56014	9.98568	3.26e-15	1.03e-12		gi|966647435|gb|KTF82345.1| hypothetical protein cypCar_00004595, partial [Cyprinus carpio]	K07994	_
	CI01000020_00686072_00697099	7.4355	5.08607	3.38e-15	1.06e-12		gi|1025129986|ref|XP_016351423.1| PREDICTED: pendrin-like [Sinocyclocheilus anshuiensis]	K14702	_
	CI01000006_04786488_04866122	8.94449	4.41188	3.68e-15	1.13e-12		gi|1025112272|ref|XP_016348432.1| PREDICTED: protein turtle homolog B isoform X2 [Sinocyclocheilus anshuiensis]	_	_
	CI01000248_00001343_00001889	11.676	4.05645	3.7e-15	1.13e-12			_	_
	CI01000082_00691711_00692356	6.61264	8.01917	3.87e-15	1.18e-12			_	_
	CI01000306_05870047_05877183	6.79788	6.55993	3.9e-15	1.18e-12		gi|1025185734|ref|XP_016422223.1| PREDICTED: UDP-glucuronosyltransferase-like [Sinocyclocheilus rhinocerous]	K00699	_
	CI01000319_04949418_04952350	-6.60561	8.34912	3.97e-15	1.18e-12		gi|1024982753|ref|XP_016313091.1| PREDICTED: pyruvate dehydrogenase (acetyl-transferring) kinase isozyme 2, mitochondrial-like [Sinocyclocheilus anshuiensis]	K00898	_
	CI01000055_05993097_06007190	7.93982	4.87611	4e-15	1.18e-12		gi|1025197825|ref|XP_016425196.1| PREDICTED: microtubule-associated protein 1B-like isoform X1 [Sinocyclocheilus rhinocerous]	K10429	_
	CI01000300_07721516_07724293	7.1186	5.60179	4.21e-15	1.23e-12		gi|1025180055|ref|XP_016421276.1| PREDICTED: methylsterol monooxygenase 1-like [Sinocyclocheilus rhinocerous]	K07750	_
	CI01000041_00436899_00449463	7.16215	5.47787	4.42e-15	1.28e-12		gi|1025269129|ref|XP_016374074.1| PREDICTED: TNF receptor-associated factor 4-like isoform X1 [Sinocyclocheilus rhinocerous]	K09848	_
	CI01000316_00918602_00975911	7.28975	5.19781	4.65e-15	1.34e-12		gi|944209663|gb|KQK76558.1| fermitin family 2 isoform X1 [Amazona aestiva]	K17083	_
	CI01000010_03204475_03207149	7.28457	5.19267	4.81e-15	1.37e-12		gi|966674655|gb|KTG08020.1| hypothetical protein cypCar_00002880 [Cyprinus carpio]	_	_
	CI01000327_03371465_03383332	6.98977	5.88342	4.86e-15	1.38e-12		gi|966670786|gb|KTG04167.1| hypothetical protein cypCar_00010350 [Cyprinus carpio]	_	_
	CI01000026_05275819_05311387	6.64734	7.26911	4.99e-15	1.4e-12		gi|47230400|emb|CAF99593.1| unnamed protein product, partial [Tetraodon nigroviridis]	K10356	_
	CI01000016_09317824_09332379	6.67889	7.02391	5.88e-15	1.62e-12		gi|1025140103|ref|XP_016419118.1| PREDICTED: extracellular matrix protein 1-like [Sinocyclocheilus rhinocerous]	_	_
	CI01116802_00000775_00001009	7.86254	4.79931	6.69e-15	1.83e-12			_	_
	CI01000129_00687257_00690956	-11.5777	3.97686	7.16e-15	1.94e-12		gi|966645939|gb|KTF80851.1| hypothetical protein cypCar_00046960 [Cyprinus carpio]	_	_
	CI01000062_01496441_01541142	11.5203	3.90137	1.05e-14	2.84e-12		gi|992214257|ref|XP_015462082.1| PREDICTED: dystrobrevin beta isoform X6 [Astyanax mexicanus]	_	molecular_function:metal ion binding(GO:0046872)
	CI01000010_11208694_11249762	11.5076	3.88872	1.14e-14	3.04e-12		gi|808876282|gb|KKF24935.1| Bicaudal D-related protein 1 [Larimichthys crocea]	K16756	_
	CI01000013_11453318_11457266	11.4948	3.87596	1.27e-14	3.36e-12		gi|1025380382|ref|XP_016400330.1| PREDICTED: GLIPR1-like protein 1 [Sinocyclocheilus rhinocerous]	_	_
	CI01000055_05916161_05919605	8.73786	4.20632	1.48e-14	3.9e-12		gi|1024981002|ref|XP_016312157.1| PREDICTED: hyaluronan and proteoglycan link protein 3-like [Sinocyclocheilus anshuiensis]	K06852	biological_process:cell adhesion(GO:0007155);molecular_function:hyaluronic acid binding(GO:0005540)
	CI01000000_17707081_17708174	6.60638	6.23381	1.6e-14	4.17e-12		gi|1025405551|ref|XP_016409154.1| PREDICTED: kinesin-like protein KIF3A [Sinocyclocheilus rhinocerous]	_	_
	CI01000008_01049703_01053618	8.05265	4.43493	1.84e-14	4.75e-12		gi|1024932376|ref|XP_016308295.1| PREDICTED: caspase-7-like [Sinocyclocheilus anshuiensis]	_	_
	CI01000047_00611745_00618340	6.36695	7.59884	2.4e-14	6.16e-12		gi|928067075|ref|XP_013883203.1| PREDICTED: ras-related C3 botulinum toxin substrate 1-like isoform X2 [Austrofundulus limnaeus]	K04392	biological_process:neurotrophin TRK receptor signaling pathway(GO:0048011);cellular_component:extrinsic component of plasma membrane(GO:0019897);molecular_function:GTP binding(GO:0005525);biological_process:inflammatory response(GO:0006954);biological_process:viral process(GO:0016032);molecular_function:protein serine/threonine kinase activity(GO:0004674);biological_process:regulation of cell mig…
	CI01000138_00713048_00750775	7.99911	4.38174	2.67e-14	6.74e-12		gi|1025033516|ref|XP_016325608.1| PREDICTED: synaptic vesicle glycoprotein 2C-like [Sinocyclocheilus anshuiensis]	K06258	_
	CI01000015_06586229_06590030	6.34825	7.4573	2.77e-14	6.94e-12		gi|1020519142|ref|XP_016098919.1| PREDICTED: adenylate cyclase, terminal-differentiation specific-like [Sinocyclocheilus grahami]	K17386	_
	CI01000030_10860938_10862107	-6.24194	9.6404	2.89e-14	7.19e-12		gi|46362456|gb|AAH66587.1| Im:6805837 protein [Danio rerio]	K04293	molecular_function:sphingosine-1-phosphate receptor activity(GO:0038036);cellular_component:integral component of membrane(GO:0016021);biological_process:G-protein coupled receptor signaling pathway(GO:0007186)
	CI01000339_04441515_04447089	-6.25941	8.75779	3.02e-14	7.45e-12		gi|973203528|ref|XP_015221604.1| PREDICTED: ATP-binding cassette sub-family B member 9 isoform X2 [Lepisosteus oculatus]	K05656	_
	CI01000347_01941265_01944365	-11.302	3.70583	4.45e-14	1.09e-11		gi|1025330913|ref|XP_016389443.1| PREDICTED: glutathione S-transferase theta-1-like [Sinocyclocheilus rhinocerous]	K00799	_
	CI01000211_00421966_00423493	-11.2847	3.68893	5.02e-14	1.22e-11		gi|966643804|gb|KTF78716.1| hypothetical protein cypCar_00038376 [Cyprinus carpio]	K09204	_
	CI01000059_03244884_03286756	6.42518	6.12459	5.12e-14	1.24e-11		gi|1025103118|ref|XP_016346060.1| PREDICTED: ras GTPase-activating protein 4-like isoform X1 [Sinocyclocheilus anshuiensis]	K17630	_
	CI01000034_05226643_05229121	-6.34586	6.70831	5.18e-14	1.24e-11		gi|1020460231|ref|XP_016134865.1| PREDICTED: coenzyme Q-binding protein COQ10 homolog, mitochondrial [Sinocyclocheilus grahami]	K18588	_
	CI01000013_10218387_10244139	-7.70738	4.29211	5.31e-14	1.26e-11		gi|1025326324|ref|XP_016388152.1| PREDICTED: semaphorin-3A [Sinocyclocheilus rhinocerous]	K06840	_
	CI01000026_01394994_01396250	11.2775	3.65975	5.34e-14	1.26e-11		gi|1025103750|ref|XP_016346227.1| PREDICTED: basic leucine zipper transcriptional factor ATF-like [Sinocyclocheilus anshuiensis]<>gi|1025103754|ref|XP_016346229.1| PREDICTED: basic leucine zipper transcriptional factor ATF-like [Sinocyclocheilus anshuiensis]	_	_
	CI01000315_00828277_00832022	-7.70168	4.28651	5.53e-14	1.3e-11		gi|1025359443|ref|XP_016398983.1| PREDICTED: CLOCK-interacting pacemaker-like [Sinocyclocheilus rhinocerous]	_	_
	CI01000294_00022646_00024368	-6.43667	6.11532	5.58e-14	1.3e-11		gi|1025233799|ref|XP_016364501.1| PREDICTED: uncharacterized protein LOC107705624 [Sinocyclocheilus rhinocerous]	_	_
	CI01000054_07599184_07601743	-7.13674	4.68021	5.66e-14	1.31e-11		gi|1020414930|ref|XP_016126286.1| PREDICTED: hairy/enhancer-of-split related with YRPW motif protein 1 [Sinocyclocheilus grahami]	K09091	biological_process:regulation of transcription, DNA-templated(GO:0006355);biological_process:Notch signaling pathway(GO:0007219);molecular_function:DNA binding(GO:0003677);molecular_function:protein dimerization activity(GO:0046983);biological_process:multicellular organismal development(GO:0007275);cellular_component:nucleus(GO:0005634)
	CI01000001_07568083_07573146	-6.546	5.75901	6.39e-14	1.47e-11		gi|1025388618|ref|XP_016404569.1| PREDICTED: carbonic anhydrase 6-like [Sinocyclocheilus rhinocerous]	K01672	_
	CI01000214_00325196_00332170	6.5936	5.4912	7.05e-14	1.61e-11		gi|966647099|gb|KTF82009.1| hypothetical protein cypCar_00050320 [Cyprinus carpio]	_	_
	CI01000340_12089553_12126875	11.2267	3.60926	7.55e-14	1.71e-11		gi|1025270847|ref|XP_016374536.1| PREDICTED: neural cell adhesion molecule L1-like protein isoform X3 [Sinocyclocheilus rhinocerous]	K06758	_
	CI01000082_02686245_02689228	6.72042	5.04033	8.57e-14	1.93e-11		gi|41054309|ref|NP_956047.1| calponin-3 [Danio rerio]<>gi|31419012|gb|AAH53309.1| Calponin 3, acidic a [Danio rerio]	_	molecular_function:actin binding(GO:0003779);biological_process:actomyosin structure organization(GO:0031032)
	CI01000018_00259118_00271046	6.21492	6.87731	9.18e-14	2.05e-11		gi|808886774|gb|KKF33283.1| Retinol dehydrogenase 10-A [Larimichthys crocea]	K11151	_
	CI01000313_01108275_01115053	-11.1815	3.58771	9.79e-14	2.17e-11		gi|1025137219|ref|XP_016414084.1| PREDICTED: potassium channel subfamily K member 18-like [Sinocyclocheilus rhinocerous]	_	_
	CI01000008_01075127_01082087	11.1687	3.5516	1.08e-13	2.38e-11		gi|1024932244|ref|XP_016307785.1| PREDICTED: protein crumbs homolog 2-like isoform X1 [Sinocyclocheilus anshuiensis]	K16681	_
	CI01000168_00516672_00548385	-6.21451	6.67455	1.11e-13	2.43e-11		gi|1025225990|ref|XP_016369040.1| PREDICTED: cAMP-specific 3',5'-cyclic phosphodiesterase 4D isoform X5 [Sinocyclocheilus rhinocerous]	K13293	_
	CI01000054_10082299_10083956	6.06963	8.43896	1.12e-13	2.43e-11		gi|374351699|gb|AEZ36049.1| tumor necrosis factor-alpha [Ctenopharyngodon idella]<>gi|387598440|gb|AFJ91827.1| TNFa [Ctenopharyngodon idella]<>gi|387598442|gb|AFJ91828.1| TNFa [Ctenopharyngodon idella]	K03156	_
	CI01000343_00971989_00973570	6.90364	4.55895	1.19e-13	2.57e-11		gi|1025078423|ref|XP_016339326.1| PREDICTED: LOW QUALITY PROTEIN: low affinity immunoglobulin gamma Fc region receptor II-like [Sinocyclocheilus anshuiensis]	_	_
	CI01000306_08986353_09011689	8.38319	3.85393	1.56e-13	3.35e-11		gi|1025074602|ref|XP_016338254.1| PREDICTED: sortilin [Sinocyclocheilus anshuiensis]	K12388	_
	CI01000070_00264644_00272503	6.76563	4.67864	1.57e-13	3.35e-11		gi|966661037|gb|KTF95787.1| hypothetical protein cypCar_00030229 [Cyprinus carpio]	_	_
	CI01000330_01306781_01324685	8.37443	3.84523	1.65e-13	3.49e-11		gi|1020526868|ref|XP_016103041.1| PREDICTED: FYVE, RhoGEF and PH domain-containing protein 6-like [Sinocyclocheilus grahami]	_	_
	CI01000219_00113688_00113990	6.73811	4.65143	1.9e-13	3.99e-11			_	_
	CI01000026_13299234_13300178	6.22882	5.86092	2.03e-13	4.25e-11		gi|1020461510|ref|XP_016135546.1| PREDICTED: type-1 angiotensin II receptor-like [Sinocyclocheilus grahami]	_	_
	CI01000016_06131958_06135495	7.68934	4.07431	2.09e-13	4.33e-11		gi|1020479759|ref|XP_016145289.1| PREDICTED: cellular retinoic acid-binding protein 2-like [Sinocyclocheilus grahami]<>gi|1025116289|ref|XP_016411865.1| PREDICTED: cellular retinoic acid-binding protein 2-like [Sinocyclocheilus rhinocerous]<>gi|1025241420|ref|XP_016366569.1| PREDICTED: cellular retinoic acid-binding protein 2-like [Sinocyclocheilus rhinocerous]	K17289	_
	CI01000034_01383935_01395565	8.32977	3.80092	2.23e-13	4.61e-11		gi|1025083575|ref|XP_016340731.1| PREDICTED: nuclear factor erythroid 2-related factor 1-like [Sinocyclocheilus anshuiensis]	_	_
	CI01000070_03054033_03062629	6.44676	5.2222	2.3e-13	4.7e-11		gi|1025082182|ref|XP_016340346.1| PREDICTED: inhibin beta A chain-like [Sinocyclocheilus anshuiensis]	K04667	_
	CI01000012_09074304_09074584	11.0568	3.44049	2.31e-13	4.7e-11		gi|1025225120|ref|XP_016366730.1| PREDICTED: ras association domain-containing protein 4-like [Sinocyclocheilus rhinocerous]	_	_
	CI01000008_01376339_01377211	-6.23006	5.98923	2.88e-13	5.83e-11		gi|1024940946|ref|XP_016359592.1| PREDICTED: cholesterol 25-hydroxylase-like protein 2 [Sinocyclocheilus anshuiensis]	K10223	_
	CI01000013_11596784_11604320	5.99593	7.23299	2.93e-13	5.9e-11		gi|966657858|gb|KTF92712.1| hypothetical protein cypCar_00007970 [Cyprinus carpio]	_	_
	CI01000145_00951480_00956106	5.8665	11.6051	2.99e-13	5.99e-11		gi|196475661|gb|ACG76387.1| CCL4 [Ctenopharyngodon idella]	_	_
	CI01112001_00000096_00002852	-6.88329	4.43133	3.02e-13	6.01e-11		gi|1025208397|ref|XP_016428050.1| PREDICTED: sucrase-isomaltase, intestinal-like [Sinocyclocheilus rhinocerous]	K12047	_
	CI01000314_01059252_01065169	6.32175	5.4426	3.14e-13	6.18e-11		gi|966662173|gb|KTF96631.1| hypothetical protein cypCar_00030863, partial [Cyprinus carpio]	_	_
	CI01000139_00374723_00396949	8.279	3.75055	3.15e-13	6.18e-11		gi|1025393581|ref|XP_016405927.1| PREDICTED: chondroitin sulfate proteoglycan 4-like [Sinocyclocheilus rhinocerous]	K08115	_
	CI01000010_01189138_01199101	-5.91334	8.2752	3.19e-13	6.23e-11		gi|116004501|ref|NP_001070611.1| 5'-nucleotidase domain-containing protein 2 [Danio rerio]<>gi|115313335|gb|AAI24328.1| 5'-nucleotidase domain containing 2 [Danio rerio]	_	molecular_function:metal ion binding(GO:0046872)
	CI01000300_11036591_11037929	-8.09563	3.76399	3.24e-13	6.29e-11		gi|1025276290|ref|XP_016376023.1| PREDICTED: hemogen isoform X2 [Sinocyclocheilus rhinocerous]	_	_
	CI01000010_00946586_00947327	-5.99034	7.02042	3.27e-13	6.31e-11		gi|1024937921|ref|XP_016329462.1| PREDICTED: pancreatic progenitor cell differentiation and proliferation factor A [Sinocyclocheilus anshuiensis]<>gi|1024937924|ref|XP_016329469.1| PREDICTED: pancreatic progenitor cell differentiation and proliferation factor A [Sinocyclocheilus anshuiensis]<>gi|1024937927|ref|XP_016329476.1| PREDICTED: pancreatic progenitor cell differentiation and proliferation…	_	biological_process:exocrine pancreas development(GO:0031017);biological_process:cell fate specification(GO:0001708);biological_process:cell proliferation(GO:0008283)
	CI01000047_04613815_04652751	10.9975	3.38155	3.44e-13	6.61e-11		gi|734638171|ref|XP_010747810.1| PREDICTED: protein TANC2-like [Larimichthys crocea]	_	_
	CI01000013_06405275_06423872	7.26747	4.20891	3.64e-13	6.92e-11		gi|1025076017|ref|XP_016338651.1| PREDICTED: sodium-dependent neutral amino acid transporter B(0)AT2 [Sinocyclocheilus anshuiensis]	K05048	cellular_component:integral component of membrane(GO:0016021);molecular_function:neurotransmitter:sodium symporter activity(GO:0005328);biological_process:neurotransmitter transport(GO:0006836)
	CI01000027_05215497_05251776	6.07451	6.33728	3.65e-13	6.92e-11		gi|1024960566|ref|XP_016301304.1| PREDICTED: cell adhesion molecule 4-like isoform X2 [Sinocyclocheilus anshuiensis]	K06783	_
	CI01000004_05355484_05357726	5.89417	7.99493	3.75e-13	7.08e-11		gi|1025257373|ref|XP_016370903.1| PREDICTED: tissue factor [Sinocyclocheilus rhinocerous]	K03901	_
	CI01000140_00635417_00640444	6.63063	4.54525	3.89e-13	7.3e-11		gi|1025038615|ref|XP_016326983.1| PREDICTED: uncharacterized protein LOC107676816 [Sinocyclocheilus anshuiensis]<>gi|1025038619|ref|XP_016326984.1| PREDICTED: uncharacterized protein LOC107676816 [Sinocyclocheilus anshuiensis]	_	_
	CI01000299_00185106_00209299	6.62244	4.53717	4.1e-13	7.6e-11		gi|1024950456|ref|XP_016295932.1| PREDICTED: 2-oxoglutarate receptor 1-like [Sinocyclocheilus anshuiensis]	K08419	_
	CI01000027_02460101_02470648	8.23609	3.70799	4.1e-13	7.6e-11		gi|1025226253|ref|XP_016369756.1| PREDICTED: dihydropyrimidinase [Sinocyclocheilus rhinocerous]	K01464	cellular_component:cytoplasm(GO:0005737);biological_process:pyrimidine nucleobase catabolic process(GO:0006208);molecular_function:hydrolase activity, acting on carbon-nitrogen (but not peptide) bonds, in cyclic amides(GO:0016812)
	CI01000080_00202124_00211154	6.07372	6.13824	4.16e-13	7.68e-11		gi|1020509474|ref|XP_016093797.1| PREDICTED: 3-hydroxy-3-methylglutaryl-coenzyme A reductase-like isoform X2 [Sinocyclocheilus grahami]	K00021	_
	CI01000059_02315334_02349602	8.2215	3.69352	4.49e-13	8.23e-11		gi|1025103023|ref|XP_016346034.1| PREDICTED: serine/threonine-protein kinase SIK2-like isoform X1 [Sinocyclocheilus anshuiensis]	K16311	_
	CI01000110_03769078_03777682	6.31584	5.21694	4.55e-13	8.29e-11		gi|62955325|ref|NP_001017674.1| sterol-4-alpha-carboxylate 3-dehydrogenase, decarboxylating [Danio rerio]<>gi|62204675|gb|AAH93332.1| NAD(P) dependent steroid dehydrogenase-like [Danio rerio]<>gi|182891368|gb|AAI64386.1| Nsdhl protein [Danio rerio]	K07748	biological_process:steroid biosynthetic process(GO:0006694);molecular_function:nucleotide binding(GO:0000166);biological_process:oxidation-reduction process(GO:0055114);molecular_function:3-beta-hydroxy-delta5-steroid dehydrogenase activity(GO:0003854)
	CI01000054_08721571_08723333	5.88109	7.66388	4.8e-13	8.71e-11		gi|1020415137|ref|XP_016126396.1| PREDICTED: MARCKS-related protein-like [Sinocyclocheilus grahami]	K13536	_
	CI01000027_02106256_02118045	-8.03246	3.70217	4.91e-13	8.86e-11		gi|1025226196|ref|XP_016369604.1| PREDICTED: neural cell adhesion molecule 1-B-like isoform X3 [Sinocyclocheilus rhinocerous]	_	_
	CI01000116_00061123_00063290	-5.78648	11.5165	5.14e-13	9.22e-11		gi|1025265207|ref|XP_016373013.1| PREDICTED: dual specificity protein phosphatase 1-like [Sinocyclocheilus rhinocerous]	K04459	_
	CI01000080_04821892_04867728	6.44504	4.76831	5.46e-13	9.63e-11		gi|1025167884|ref|XP_016419309.1| PREDICTED: unconventional myosin-Ib-like isoform X7 [Sinocyclocheilus rhinocerous]	K10356	_
	CI01000046_02873360_02887683	5.83872	8.0407	5.54e-13	9.71e-11		gi|1029201548|ref|NP_001313419.1| sorting nexin-8 [Danio rerio]	K17922	_
	CI01000049_08001463_08004396	5.9334	6.41316	6.47e-13	1.13e-10		gi|966677784|gb|KTG11083.1| hypothetical protein cypCar_00009710 [Cyprinus carpio]	K16661	_
	CI01000340_00672283_00673853	-5.79832	8.40186	6.73e-13	1.17e-10		gi|50345090|ref|NP_001002216.1| growth arrest and DNA-damage-inducible, alpha, b [Danio rerio]<>gi|49257169|gb|AAH74023.1| Growth arrest and DNA-damage-inducible, alpha [Danio rerio]<>gi|49901231|gb|AAH75932.1| Growth arrest and DNA-damage-inducible, alpha [Danio rerio]<>gi|156914721|gb|AAI52638.1| Gadd45a protein [Danio rerio]<>gi|182891636|gb|AAI64910.1| Gadd45a protein [Danio rerio]	K04402	biological_process:response to stress(GO:0006950);cellular_component:nucleus(GO:0005634);biological_process:regulation of cell cycle(GO:0051726)
	CI01000113_00256900_00257501	-7.31411	3.90649	7.2e-13	1.24e-10		gi|22135546|gb|AAM93253.1| beta globin [Ctenopharyngodon idella]	K13825	biological_process:oxygen transport(GO:0015671);molecular_function:oxygen transporter activity(GO:0005344);cellular_component:hemoglobin complex(GO:0005833);molecular_function:iron ion binding(GO:0005506);molecular_function:heme binding(GO:0020037);biological_process:response to hypoxia(GO:0001666);molecular_function:oxygen binding(GO:0019825)
	CI01000092_00847979_00851661	-5.79045	8.26211	7.26e-13	1.25e-10		gi|1020467366|ref|XP_016138672.1| PREDICTED: lysophosphatidic acid receptor 6-like [Sinocyclocheilus grahami]	K04273	_
	CI01000335_00681430_00741137	5.75478	9.26199	7.41e-13	1.27e-10		gi|1024957436|ref|XP_016299648.1| PREDICTED: dedicator of cytokinesis protein 4-like [Sinocyclocheilus anshuiensis]	K17697	molecular_function:guanyl-nucleotide exchange factor activity(GO:0005085);biological_process:small GTPase mediated signal transduction(GO:0007264)
	CI01000339_02678291_02691492	6.62552	4.28414	7.62e-13	1.3e-10		gi|1025007917|ref|XP_016322461.1| PREDICTED: GAS2-like protein 1 [Sinocyclocheilus anshuiensis]	_	_
	CI01000340_09751682_09758397	6.12926	5.53027	7.81e-13	1.32e-10		gi|1025264031|ref|XP_016372696.1| PREDICTED: alpha-enolase-like isoform X2 [Sinocyclocheilus rhinocerous]	K01689	_
	CI01094843_00000354_00001515	10.8643	3.24938	8.1e-13	1.36e-10		gi|1020591299|ref|XP_016116197.1| PREDICTED: B-cell receptor CD22-like [Sinocyclocheilus grahami]	K06467	_
	CI01000070_00016908_00017906	5.73888	7.89338	1.07e-12	1.79e-10		gi|1025111797|ref|XP_016348355.1| PREDICTED: C-C chemokine receptor type 1-like [Sinocyclocheilus anshuiensis]	_	_
	CI01000140_01365745_01368758	6.86789	4.2119	1.23e-12	2.04e-10		gi|1020594524|ref|XP_016116831.1| PREDICTED: uncharacterized protein LOC107574919 [Sinocyclocheilus grahami]	_	_
	CI01000040_06430248_06431402	10.7752	3.16105	1.45e-12	2.4e-10		gi|1025141691|ref|XP_016353560.1| PREDICTED: glucose-dependent insulinotropic receptor-like [Sinocyclocheilus anshuiensis]	K08424	_
	CI01000001_04402985_04419845	-5.71608	7.39521	1.52e-12	2.49e-10		gi|966671963|gb|KTG05344.1| hypothetical protein cypCar_00013622 [Cyprinus carpio]	_	_
	CI01000012_00194370_00195347	-5.74907	6.98715	1.58e-12	2.58e-10		gi|1020455909|ref|XP_016134106.1| PREDICTED: hydroxycarboxylic acid receptor 2-like [Sinocyclocheilus grahami]<>gi|1020455912|ref|XP_016134108.1| PREDICTED: hydroxycarboxylic acid receptor 2-like [Sinocyclocheilus grahami]<>gi|1020455916|ref|XP_016134109.1| PREDICTED: hydroxycarboxylic acid receptor 2-like [Sinocyclocheilus grahami]	_	_
	CI01000304_13068737_13075920	7.04172	3.98555	1.61e-12	2.62e-10		gi|966642877|gb|KTF77789.1| hypothetical protein cypCar_00038058 [Cyprinus carpio]	_	_
	CI01000304_12353305_12359214	6.51007	4.17028	1.66e-12	2.68e-10		gi|966656962|gb|KTF91816.1| hypothetical protein cypCar_00027496 [Cyprinus carpio]	K14365	molecular_function:zinc ion binding(GO:0008270)
	CI01000001_08036532_08037745	-6.62291	4.1765	1.69e-12	2.73e-10		gi|18858803|ref|NP_571948.1| transcription factor HES-4 [Danio rerio]<>gi|10834823|gb|AAG23838.1|AF301264_1 bHLH-WRPW transcription factor [Danio rerio]<>gi|50925997|gb|AAH79516.1| Hairy-related 9 [Danio rerio]	K06054	biological_process:regulation of transcription, DNA-templated(GO:0006355);biological_process:negative regulation of neurogenesis(GO:0050768);molecular_function:DNA binding(GO:0003677);molecular_function:protein dimerization activity(GO:0046983);cellular_component:nucleus(GO:0005634)
	CI01000010_05523602_05535371	6.27164	4.5974	1.73e-12	2.76e-10		gi|966655615|gb|KTF90469.1| hypothetical protein cypCar_00011049 [Cyprinus carpio]	_	_
	CI01000013_10756927_10790192	8.01702	3.49092	1.73e-12	2.76e-10		gi|966655378|gb|KTF90232.1| hypothetical protein cypCar_00018293 [Cyprinus carpio]	_	molecular_function:cation:chloride symporter activity(GO:0015377);cellular_component:apical plasma membrane(GO:0016324);biological_process:transmembrane transport(GO:0055085);biological_process:ion transport(GO:0006811);cellular_component:integral component of membrane(GO:0016021)
	CI01000462_00006733_00007700	7.0256	3.96963	1.78e-12	2.83e-10		gi|1025244074|ref|XP_016367296.1| PREDICTED: B-cell receptor CD22-like [Sinocyclocheilus rhinocerous]	_	_
	CI01000321_01285727_01288625	6.10428	5.00854	1.86e-12	2.93e-10		gi|33416413|gb|AAH55622.1| Snx10a protein [Danio rerio]	K17924	_
	CI01000342_00154461_00167874	6.4887	4.14922	1.89e-12	2.97e-10		gi|966705015|gb|KTG37256.1| hypothetical protein cypCar_00021170 [Cyprinus carpio]	_	molecular_function:cation:chloride symporter activity(GO:0015377);cellular_component:integral component of membrane(GO:0016021);biological_process:ion transport(GO:0006811);biological_process:transmembrane transport(GO:0055085)
	CI01000043_04821316_04858515	5.86056	5.75972	1.94e-12	3.03e-10		gi|966703897|gb|KTG36138.1| hypothetical protein cypCar_00036806 [Cyprinus carpio]	K07995	_
	CI01000000_10911953_10912619	10.7249	3.11117	1.97e-12	3.07e-10		gi|1025189920|ref|XP_016423424.1| PREDICTED: transcription cofactor vestigial-like protein 1 [Sinocyclocheilus rhinocerous]	_	_
	CI01000018_06386938_06390509	-7.15634	3.75236	2.07e-12	3.2e-10			_	_
	CI01000010_03142808_03164874	5.99916	5.31559	2.08e-12	3.21e-10		gi|1025295702|ref|XP_016379828.1| PREDICTED: uncharacterized protein C1orf21 homolog [Sinocyclocheilus rhinocerous]	_	_
	CI01000004_11043026_11046108	-5.81629	6.0317	2.23e-12	3.41e-10		gi|1020401780|ref|XP_016095179.1| PREDICTED: probable G-protein coupled receptor 141 [Sinocyclocheilus grahami]	_	_
	CI01000051_01926867_01942055	5.77625	6.08965	2.6e-12	3.97e-10		gi|597798362|ref|XP_007260728.1| PREDICTED: delta(24)-sterol reductase [Astyanax mexicanus]<>gi|992225571|ref|XP_015464173.1| PREDICTED: delta(24)-sterol reductase [Astyanax mexicanus]	K09828	_
	CI01000304_06529800_06545548	-7.76868	3.44464	2.74e-12	4.16e-10		gi|528491476|ref|XP_708125.5| PREDICTED: V-type proton ATPase 116 kDa subunit a isoform X2 [Danio rerio]	K02154	_
	CI01000319_04991514_04999964	6.30878	4.22794	3.25e-12	4.92e-10		gi|1025193477|ref|XP_016424010.1| PREDICTED: carcinoembryonic antigen-related cell adhesion molecule 5-like [Sinocyclocheilus rhinocerous]	_	_
	CI01000304_06864719_06866382	5.73766	6.09597	3.27e-12	4.92e-10		gi|1025077187|ref|XP_016338980.1| PREDICTED: iporin-like isoform X1 [Sinocyclocheilus anshuiensis]	_	_
	CI01000364_00002233_00008090	6.29511	4.21448	3.61e-12	5.42e-10		gi|1024967459|ref|XP_016305005.1| PREDICTED: guanylate-binding protein 6-like [Sinocyclocheilus anshuiensis]	_	_
	CI01000347_01789688_01837489	6.06342	4.70899	3.77e-12	5.62e-10		gi|1025263053|ref|XP_016372432.1| PREDICTED: breakpoint cluster region protein isoform X1 [Sinocyclocheilus rhinocerous]	K08878	_
	CI01000105_02384124_02399539	5.48192	9.59556	4.33e-12	6.43e-10		gi|670990181|ref|XP_008686068.1| PREDICTED: aminopeptidase N [Ursus maritimus]	K11140	_
	CI01000050_03238081_03239214	10.6027	2.99023	4.54e-12	6.7e-10		gi|966710366|gb|KTG42604.1| hypothetical protein cypCar_00000324 [Cyprinus carpio]	K04204	_
	CI01000026_01400733_01422031	10.5947	2.98232	4.76e-12	7e-10		gi|1020426291|ref|XP_016131700.1| PREDICTED: serine/threonine-protein phosphatase 2A 56 kDa regulatory subunit beta isoform-like [Sinocyclocheilus grahami]	K11584	_
	CI01000018_04823817_04825235	-5.74954	5.72761	4.98e-12	7.29e-10		gi|1025231657|ref|XP_016363918.1| PREDICTED: diamine acetyltransferase 1-like [Sinocyclocheilus rhinocerous]	K00657	_
	CI01000004_07360794_07364249	-5.46167	9.08135	5.35e-12	7.76e-10		gi|1020395232|ref|XP_016127715.1| PREDICTED: cysteine/serine-rich nuclear protein 1-like [Sinocyclocheilus grahami]	K17494	_
	CI01000030_01091944_01093682	-5.46901	8.40704	5.5e-12	7.93e-10		gi|1020465657|ref|XP_016137758.1| PREDICTED: Krueppel-like factor 2 [Sinocyclocheilus grahami]	K17845	_
	CI01000004_01252844_01260204	10.5705	2.95835	5.51e-12	7.93e-10		gi|528470252|ref|XP_005163310.1| PREDICTED: flocculation protein FLO11-like [Danio rerio]	_	_
	CI01000058_01348684_01352173	6.15411	4.29301	5.55e-12	7.95e-10		gi|1020465353|ref|XP_016137603.1| PREDICTED: dysbindin-like isoform X1 [Sinocyclocheilus grahami]	_	_
	CI01000063_00811088_00811849	5.55283	6.82144	5.61e-12	8.01e-10		gi|966643343|gb|KTF78255.1| hypothetical protein cypCar_00042470 [Cyprinus carpio]	K10223	cellular_component:endoplasmic reticulum membrane(GO:0005789);biological_process:fatty acid biosynthetic process(GO:0006633);molecular_function:monooxygenase activity(GO:0004497);molecular_function:iron ion binding(GO:0005506);cellular_component:integral component of membrane(GO:0016021);biological_process:sterol biosynthetic process(GO:0016126);biological_process:oxidation-reduction process(GO:0…
	CI01000016_02793868_02796984	-5.83703	5.16906	5.88e-12	8.35e-10		gi|966636355|gb|KTF71459.1| hypothetical protein cypCar_00042179 [Cyprinus carpio]	_	_
	CI01000146_01161579_01190874	5.72226	5.36289	5.97e-12	8.44e-10		gi|1020491905|ref|XP_016084383.1| PREDICTED: vinexin-like [Sinocyclocheilus grahami]	_	_
	CI01000000_17943046_17977294	5.87621	5.00416	6.05e-12	8.51e-10		gi|1007706278|ref|XP_015805135.1| PREDICTED: multidrug resistance-associated protein 5 [Nothobranchius furzeri]	K05668	_
	CI01000032_00511336_00516935	-5.56184	6.53678	6.07e-12	8.51e-10		gi|1025058344|ref|XP_016332330.1| PREDICTED: zinc finger protein 395-like isoform X1 [Sinocyclocheilus anshuiensis]<>gi|1025058348|ref|XP_016332331.1| PREDICTED: zinc finger protein 395-like isoform X1 [Sinocyclocheilus anshuiensis]	_	_
	CI01000063_01047868_01059684	7.82447	3.30046	6.26e-12	8.74e-10		gi|1025197406|ref|XP_016425078.1| PREDICTED: cytohesin-3-like [Sinocyclocheilus rhinocerous]	K18441	_
	CI01000092_01266540_01267541	6.83071	3.77719	6.38e-12	8.87e-10		gi|1025312019|ref|XP_016384278.1| PREDICTED: P2Y purinoceptor 14-like [Sinocyclocheilus rhinocerous]	K04299	_
	CI01000034_05110485_05112103	-5.49927	7.12192	6.74e-12	9.33e-10		gi|966646906|gb|KTF81816.1| hypothetical protein cypCar_00025933 [Cyprinus carpio]	K14443	_
	CI01000467_00006688_00012310	5.84805	4.97652	7.29e-12	1e-09		gi|1020588956|ref|XP_016115749.1| PREDICTED: B-cell receptor CD22-like [Sinocyclocheilus grahami]	K06467	_
	CI01000000_12831074_12852405	-5.70458	5.39743	7.4e-12	1.02e-09		gi|966655311|gb|KTF90165.1| hypothetical protein cypCar_00029463 [Cyprinus carpio]	_	_
	CI01094842_00000124_00000722	10.5208	2.90917	7.43e-12	1.02e-09		gi|1025244070|ref|XP_016367295.1| PREDICTED: B-cell receptor CD22-like [Sinocyclocheilus rhinocerous]	K06467	_
	CI01000000_11706374_11719063	10.5038	2.8924	8.23e-12	1.12e-09		gi|966703668|gb|KTG35909.1| hypothetical protein cypCar_00008249 [Cyprinus carpio]	_	_
	CI01000219_00407721_00426868	6.25979	3.92394	8.49e-12	1.15e-09		gi|51949771|gb|AAU14809.1| fibronectin 1b [Danio rerio]	K06467	biological_process:somitogenesis(GO:0001756)
	CI01000300_03694786_03699730	-5.3732	9.74075	8.9e-12	1.2e-09		gi|1025412361|ref|XP_016410990.1| PREDICTED: nocturnin-like isoform X1 [Sinocyclocheilus rhinocerous]	K18764	_
	CI01000072_03204448_03208684	-10.4832	2.90673	9.12e-12	1.23e-09		gi|617401497|ref|XP_007552512.1| PREDICTED: creatine kinase M-type [Poecilia formosa]	K00933	_
	CI01000004_17368205_17412619	7.09895	3.49029	1.01e-11	1.35e-09		gi|1025247965|ref|XP_016368364.1| PREDICTED: solute carrier family 22 member 23-like [Sinocyclocheilus rhinocerous]	K08215	_
	CI01000306_01880262_01881242	7.09329	3.4847	1.05e-11	1.39e-09		gi|1025056648|ref|XP_016331860.1| PREDICTED: uncharacterized protein LOC107680489 isoform X2 [Sinocyclocheilus anshuiensis]	_	_
	CI01000030_04225211_04225930	-5.80965	4.9236	1.1e-11	1.46e-09		gi|1025161811|ref|XP_016356132.1| PREDICTED: cyclin-dependent kinases regulatory subunit 1-like [Sinocyclocheilus anshuiensis]<>gi|1025161815|ref|XP_016356133.1| PREDICTED: cyclin-dependent kinases regulatory subunit 1-like [Sinocyclocheilus anshuiensis]<>gi|1025161821|ref|XP_016356134.1| PREDICTED: cyclin-dependent kinases regulatory subunit 1-like [Sinocyclocheilus anshuiensis]<>gi|1025305480|r…	_	molecular_function:cyclin-dependent protein serine/threonine kinase regulator activity(GO:0016538);biological_process:cell cycle(GO:0007049)
	CI01000113_01691097_01696776	-7.5395	3.22177	1.2e-11	1.58e-09		gi|1020481784|ref|XP_016146377.1| PREDICTED: Fc receptor-like protein 2 [Sinocyclocheilus grahami]	_	_
	CI01000027_07947743_07951397	5.33095	8.72434	1.28e-11	1.69e-09		gi|1024932632|ref|XP_016309191.1| PREDICTED: cathepsin K-like [Sinocyclocheilus anshuiensis]<>gi|1024932634|ref|XP_016309197.1| PREDICTED: cathepsin K-like [Sinocyclocheilus anshuiensis]	K01371	_
	CI01000115_00737736_00741345	-6.53417	3.69481	1.29e-11	1.69e-09		gi|1020405469|ref|XP_016113962.1| PREDICTED: phosphatidylcholine-sterol acyltransferase [Sinocyclocheilus grahami]	K00650	_
	CI01000160_00386379_00387321	7.05882	3.45071	1.33e-11	1.74e-09		gi|1020464367|ref|XP_016137081.1| PREDICTED: C-type lectin domain family 10 member A-like [Sinocyclocheilus grahami]	_	_
	CI01000219_00110358_00110660	5.67067	5.23895	1.36e-11	1.77e-09			_	_
	CI01000115_00743795_00753136	-5.86535	4.71987	1.36e-11	1.77e-09		gi|966641836|gb|KTF76750.1| hypothetical protein cypCar_00016538 [Cyprinus carpio]	K18402	_
	CI01000340_18067035_18082396	-7.51506	3.19806	1.42e-11	1.82e-09		gi|1024981858|ref|XP_016312610.1| PREDICTED: N-terminal EF-hand calcium-binding protein 1-like isoform X1 [Sinocyclocheilus anshuiensis]<>gi|1024981860|ref|XP_016312611.1| PREDICTED: N-terminal EF-hand calcium-binding protein 1-like isoform X2 [Sinocyclocheilus anshuiensis]	_	_
	CI01000120_00488974_00500193	7.68961	3.16728	1.48e-11	1.89e-09		gi|1025230123|ref|XP_016432050.1| PREDICTED: non-muscle caldesmon-like isoform X1 [Sinocyclocheilus rhinocerous]	_	_
	CI01000010_05538251_05562058	6.06877	3.99207	1.59e-11	2.02e-09		gi|528487100|ref|XP_005166885.1| PREDICTED: formin-binding protein 1-like isoform X3 [Danio rerio]	_	_
	CI01000219_00342584_00355695	5.34324	7.05377	1.72e-11	2.17e-09		gi|1025228813|ref|XP_016431694.1| PREDICTED: B-cell receptor CD22-like, partial [Sinocyclocheilus rhinocerous]	K06467	_
	CI01000051_07410144_07439528	-5.31881	7.6555	1.72e-11	2.17e-09		gi|1024956748|ref|XP_016299283.1| PREDICTED: microtubule-associated serine/threonine-protein kinase 3-like [Sinocyclocheilus anshuiensis]	K08789	_
	CI01000265_00039287_00064707	5.32173	7.5223	1.72e-11	2.17e-09		gi|688615301|ref|XP_009295943.1| PREDICTED: glucose-fructose oxidoreductase domain-containing protein 1 [Danio rerio]<>gi|1040681317|ref|XP_017209467.1| PREDICTED: glucose-fructose oxidoreductase domain-containing protein 1 [Danio rerio]	_	_
	CI01000020_03660304_03682653	5.35798	6.78498	1.75e-11	2.19e-09		gi|1025334249|ref|XP_016390350.1| PREDICTED: plexin-B2-like [Sinocyclocheilus rhinocerous]	K06821	_
	CI01000051_03022303_03035625	5.42095	6.0978	1.83e-11	2.29e-09		gi|966713910|gb|KTG46148.1| hypothetical protein cypCar_00012239 [Cyprinus carpio]	K14825	biological_process:transport(GO:0006810);cellular_component:integral component of membrane(GO:0016021)
	CI01000340_18091595_18104080	-5.68035	4.91116	2.04e-11	2.53e-09		gi|1025401728|ref|XP_016408133.1| PREDICTED: protein CBFA2T2-like isoform X1 [Sinocyclocheilus rhinocerous]	K10053	_
	CI01000347_01334169_01335397	-6.23274	4.10549	2.09e-11	2.58e-09		gi|1025330949|ref|XP_016389452.1| PREDICTED: histone H1.4-like [Sinocyclocheilus rhinocerous]	_	_
	CI01000026_10750149_10752108	-5.30514	7.23248	2.14e-11	2.63e-09		gi|1024959332|ref|XP_016300658.1| PREDICTED: low choriolytic enzyme-like [Sinocyclocheilus anshuiensis]	_	_
	CI01000072_03898250_03900844	-10.3405	2.76854	2.29e-11	2.81e-09		gi|1025131114|ref|XP_016351624.1| PREDICTED: transmembrane protein 136-like [Sinocyclocheilus anshuiensis]<>gi|1025131120|ref|XP_016351625.1| PREDICTED: transmembrane protein 136-like [Sinocyclocheilus anshuiensis]	_	_
	CI01000092_01034513_01049419	-7.43264	3.11817	2.39e-11	2.92e-09		gi|966646077|gb|KTF80989.1| hypothetical protein cypCar_00043230, partial [Cyprinus carpio]	_	_
	CI01000051_01015039_01066156	5.60448	5.01514	2.53e-11	3.09e-09		gi|597741917|ref|XP_007233080.1| PREDICTED: cadherin-2 [Astyanax mexicanus]	K06736	_
	CI01000130_00775147_00778644	5.6054	4.92943	2.8e-11	3.4e-09		gi|1020589865|ref|XP_016115923.1| PREDICTED: volume-regulated anion channel subunit LRRC8E-like isoform X1 [Sinocyclocheilus grahami]	_	_
	CI01000325_02532897_02550596	-5.52783	5.30229	3.03e-11	3.65e-09		gi|1025206220|ref|XP_016427453.1| PREDICTED: mast/stem cell growth factor receptor kita-like isoform X3 [Sinocyclocheilus rhinocerous]	K05091	_
	CI01000006_03350988_03356496	-5.73596	4.59398	3.17e-11	3.81e-09		gi|1025166231|ref|XP_016356965.1| PREDICTED: endothelial PAS domain-containing protein 1-like [Sinocyclocheilus anshuiensis]	_	molecular_function:signal transducer activity(GO:0004871);biological_process:regulation of transcription, DNA-templated(GO:0006355);molecular_function:DNA binding(GO:0003677);molecular_function:protein dimerization activity(GO:0046983);biological_process:signal transduction(GO:0007165);cellular_component:nucleus(GO:0005634)
	CI01000012_00863269_00864644	-5.21761	7.60705	3.24e-11	3.88e-09		gi|1025241358|ref|XP_016366550.1| PREDICTED: zinc finger protein 36, C3H1 type-like 2 isoform X2 [Sinocyclocheilus rhinocerous]	K18753	_
	CI01000012_12526785_12534198	-5.15962	12.1049	3.31e-11	3.95e-09		gi|1025333569|ref|XP_016390167.1| PREDICTED: disintegrin and metalloproteinase domain-containing protein 8-like isoform X1 [Sinocyclocheilus rhinocerous]	K06540	_
	CI01000016_09181426_09182326	5.59518	4.82731	3.36e-11	3.99e-09		gi|1025072701|ref|XP_016337733.1| PREDICTED: tumor necrosis factor receptor superfamily member 1A-like isoform X1 [Sinocyclocheilus anshuiensis]<>gi|1025072703|ref|XP_016337734.1| PREDICTED: tumor necrosis factor receptor superfamily member 1A-like isoform X1 [Sinocyclocheilus anshuiensis]	_	_
	CI01000028_06969947_06983352	5.28075	6.48437	3.43e-11	4.06e-09		gi|1025170827|ref|XP_016357797.1| PREDICTED: trypsin-3-like [Sinocyclocheilus anshuiensis]	_	_
	CI01000113_00503311_00504977	5.76795	4.26966	3.44e-11	4.06e-09		gi|1025200231|ref|XP_016425853.1| PREDICTED: neural cell adhesion molecule 1-like [Sinocyclocheilus rhinocerous]	_	_
	CI01024613_00002676_00002994	5.60763	4.74106	3.55e-11	4.18e-09		gi|966668578|gb|KTG01959.1| hypothetical protein cypCar_00009736, partial [Cyprinus carpio]	_	_
	CI01000063_00188800_00192370	-10.2723	2.70259	3.64e-11	4.26e-09		gi|685560933|ref|XP_009212289.1| PREDICTED: glycylpeptide N-tetradecanoyltransferase 2 isoform X2 [Papio anubis]	_	_
	CI01000039_07077165_07115931	-6.70491	3.31358	3.78e-11	4.41e-09		gi|1020474162|ref|XP_016142308.1| PREDICTED: ectodysplasin-A isoform X2 [Sinocyclocheilus grahami]	K05480	_
	CI01000340_16184729_16192901	-5.185	7.85414	3.82e-11	4.44e-09		gi|587655614|gb|AHK09952.1| plasminogen [Ctenopharyngodon idella]	_	biological_process:proteolysis(GO:0006508);biological_process:bone mineralization(GO:0030282);molecular_function:serine-type endopeptidase activity(GO:0004252)
	CI01000030_04237332_04243409	-5.19996	7.37827	3.89e-11	4.51e-09		gi|1020466976|ref|XP_016138468.1| PREDICTED: SHC-transforming protein 2-like isoform X1 [Sinocyclocheilus grahami]<>gi|1020466978|ref|XP_016138469.1| PREDICTED: SHC-transforming protein 2-like isoform X1 [Sinocyclocheilus grahami]	K17447	_
	CI01000181_00174917_00242327	-6.13113	4.00669	4.04e-11	4.67e-09		gi|34555652|gb|AAQ74974.1| complement C3 [Ctenopharyngodon idella]	K03990	_
	CI01000051_00638200_00720543	5.35926	5.54044	4.45e-11	5.13e-09		gi|1025068740|ref|XP_016336643.1| PREDICTED: serine/threonine-protein kinase MRCK beta-like isoform X2 [Sinocyclocheilus anshuiensis]	K16307	_
	CI01000011_00202331_00204534	7.51714	2.99725	4.56e-11	5.23e-09		gi|161878880|gb|ABX79926.1| histidine-isoleucine/vasoactive intestinal polypeptide [Danio rerio]	K05264	cellular_component:extracellular region(GO:0005576);molecular_function:hormone activity(GO:0005179);biological_process:phospholipase C-activating G-protein coupled receptor signaling pathway(GO:0007200);biological_process:adenylate cyclase-modulating G-protein coupled receptor signaling pathway(GO:0007188)
	CI01000026_10730656_10743321	-5.11533	10.1041	4.69e-11	5.36e-09		gi|1024959332|ref|XP_016300658.1| PREDICTED: low choriolytic enzyme-like [Sinocyclocheilus anshuiensis]	_	_
	CI01000304_01560571_01565345	5.18742	6.90197	4.78e-11	5.45e-09		gi|1025115297|ref|XP_016403950.1| PREDICTED: hydroxymethylglutaryl-CoA synthase, cytoplasmic-like isoform X1 [Sinocyclocheilus rhinocerous]	K01641	_
	CI01000204_00009081_00017874	7.50112	2.98147	5.02e-11	5.7e-09		gi|1020420581|ref|XP_016129305.1| PREDICTED: mast cell protease 1A-like [Sinocyclocheilus grahami]	_	_
	CI01000302_00165901_00166714	5.15727	7.36213	5.09e-11	5.76e-09		gi|966670141|gb|KTG03522.1| hypothetical protein cypCar_00022916 [Cyprinus carpio]	_	_
	CI01000026_09900193_09906874	-5.24005	6.37778	5.14e-11	5.79e-09		gi|225579055|ref|NP_001139486.1| sal-like protein 1 [Danio rerio]	_	molecular_function:zinc ion binding(GO:0008270);molecular_function:nucleic acid binding(GO:0003676);cellular_component:intracellular(GO:0005622);biological_process:embryonic pectoral fin morphogenesis(GO:0035118);biological_process:positive regulation of fibroblast growth factor receptor signaling pathway(GO:0045743)
	CI01000047_03947036_03979744	5.15663	7.07923	5.38e-11	6.04e-09		gi|1025249669|ref|XP_016368827.1| PREDICTED: integrin alpha-X-like [Sinocyclocheilus rhinocerous]	K06462	_
	CI01000158_01561252_01564385	-5.12344	8.14381	5.42e-11	6.07e-09		gi|1024963203|ref|XP_016302725.1| PREDICTED: arrestin domain-containing protein 3-like isoform X1 [Sinocyclocheilus anshuiensis]	_	_
	CI01000000_17759341_17772818	10.2117	2.60405	5.56e-11	6.21e-09		gi|1025043113|ref|XP_016328212.1| PREDICTED: putative E3 ubiquitin-protein ligase SH3RF2 [Sinocyclocheilus anshuiensis]	_	_
	CI01000300_04484210_04500530	5.24323	6.05832	5.65e-11	6.29e-09		gi|1020527125|ref|XP_016103176.1| PREDICTED: rho GTPase-activating protein 7-like isoform X1 [Sinocyclocheilus grahami]	_	_
	CI01000086_01005334_01006342	5.1963	6.40216	5.97e-11	6.61e-09		gi|966706961|gb|KTG39202.1| hypothetical protein cypCar_00034842 [Cyprinus carpio]	K04328	_
	CI01000303_00191496_00193762	-5.26878	5.92334	6.06e-11	6.69e-09		gi|1025172864|ref|XP_016358168.1| PREDICTED: uncharacterized protein LOC107700857 [Sinocyclocheilus anshuiensis]<>gi|1025172870|ref|XP_016358169.1| PREDICTED: uncharacterized protein LOC107700857 [Sinocyclocheilus anshuiensis]	_	_
	CI01000030_10919162_10925437	6.81899	3.21456	6.11e-11	6.73e-09		gi|966647636|gb|KTF82546.1| hypothetical protein cypCar_00033036 [Cyprinus carpio]	_	_
	CI01000082_03793674_03817588	5.08072	9.0257	6.32e-11	6.94e-09		gi|1025099003|ref|XP_016344911.1| PREDICTED: anion exchange protein 2-like isoform X1 [Sinocyclocheilus anshuiensis]<>gi|1025099007|ref|XP_016344912.1| PREDICTED: anion exchange protein 2-like isoform X1 [Sinocyclocheilus anshuiensis]<>gi|1025099011|ref|XP_016344913.1| PREDICTED: anion exchange protein 2-like isoform X1 [Sinocyclocheilus anshuiensis]<>gi|1025099015|ref|XP_016344915.1| PREDICTED: …	K13856	_
	CI01025407_00002441_00002757	-5.1324	7.01289	6.92e-11	7.57e-09		gi|335987425|gb|AEH76780.1| immunoglobulin light chain L3.2, partial [Ctenopharyngodon idella]	_	_
	CI01000118_00366254_00372631	-5.49067	4.72695	6.97e-11	7.6e-09		gi|1025051505|ref|XP_016330443.1| PREDICTED: Krueppel-like factor 6 [Sinocyclocheilus anshuiensis]	K09207	molecular_function:binding(GO:0005488)
	CI01000069_03721128_03722393	6.79126	3.1873	7.53e-11	8.18e-09			_	_
	CI01000010_00388349_00390056	5.12795	6.53998	7.92e-11	8.58e-09		gi|1024990365|ref|XP_016315283.1| PREDICTED: tumor necrosis factor receptor superfamily member 14-like [Sinocyclocheilus anshuiensis]	_	_
	CI01000006_00627639_00634083	10.1367	2.53017	8.67e-11	9.32e-09		gi|1020445138|ref|XP_016132492.1| PREDICTED: ADP-ribosylation factor-like protein 3 [Sinocyclocheilus grahami]	K07944	molecular_function:GTP binding(GO:0005525);cellular_component:intracellular(GO:0005622);biological_process:small GTPase mediated signal transduction(GO:0007264)
	CI01000012_00223417_00223713	-10.1349	2.5701	8.67e-11	9.32e-09			_	_
	CI01000219_00492538_00495015	5.58103	4.23637	8.76e-11	9.35e-09		gi|1024945837|ref|XP_016361968.1| PREDICTED: CMRF35-like molecule 5 isoform X1 [Sinocyclocheilus anshuiensis]	_	_
	CI01040282_00000420_00001091	-6.01943	3.59005	8.76e-11	9.35e-09		gi|974054482|ref|XP_015251424.1| PREDICTED: cAMP-specific 3',5'-cyclic phosphodiesterase 4D isoform X1 [Cyprinodon variegatus]	K13293	_
	CI01000353_01958077_01995266	5.23855	5.60827	8.77e-11	9.35e-09		gi|966655344|gb|KTF90198.1| hypothetical protein cypCar_00034719 [Cyprinus carpio]	_	_
	CI01000316_00584409_00585328	5.89315	3.56456	9.35e-11	9.93e-09		gi|1020507720|ref|XP_016092878.1| PREDICTED: probable ergosterol biosynthetic protein 28 [Sinocyclocheilus grahami]<>gi|1020507722|ref|XP_016092879.1| PREDICTED: probable ergosterol biosynthetic protein 28 [Sinocyclocheilus grahami]	_	_
	CI01000006_06438579_06447777	-7.21474	2.9076	9.6e-11	1.02e-08		gi|1025060037|ref|XP_016332794.1| PREDICTED: ELMO domain-containing protein 1-like isoform X2 [Sinocyclocheilus anshuiensis]<>gi|1025060041|ref|XP_016332795.1| PREDICTED: ELMO domain-containing protein 1-like isoform X3 [Sinocyclocheilus anshuiensis]	_	_
	CI01000300_10698449_10700497	10.1145	2.50834	9.87e-11	1.04e-08		gi|966655847|gb|KTF90701.1| hypothetical protein cypCar_00035300 [Cyprinus carpio]	_	_
	CI01000070_04679660_04692608	5.04098	7.56579	1e-10	1.05e-08		gi|528519054|ref|XP_005170669.1| PREDICTED: integrin beta-1 isoform X2 [Danio rerio]	K05719	_
	CI01000340_11194496_11206585	-6.54855	3.16249	1.06e-10	1.11e-08		gi|61806472|ref|NP_001013468.1| uncharacterized protein LOC541322 [Danio rerio]<>gi|60649639|gb|AAH90471.1| Zgc:113054 [Danio rerio]	_	molecular_function:O-methyltransferase activity(GO:0008171);biological_process:metabolic process(GO:0008152);molecular_function:oxidoreductase activity(GO:0016491);molecular_function:nucleotide binding(GO:0000166)
	CI01000027_05781043_05784234	5.7758	3.70524	1.07e-10	1.12e-08		gi|1025324776|ref|XP_016387746.1| PREDICTED: kelch-like protein 38 isoform X2 [Sinocyclocheilus rhinocerous]	_	_
	CI01000019_05091209_05124800	-5.03156	7.5331	1.1e-10	1.14e-08		gi|688548595|ref|XP_009298713.1| PREDICTED: sialic acid-binding Ig-like lectin 13 [Danio rerio]	_	_
	CI01000019_05450121_05452246	4.99512	8.8125	1.11e-10	1.16e-08		gi|1025117122|ref|XP_016349274.1| PREDICTED: fibroleukin-like [Sinocyclocheilus anshuiensis]	_	_
	CI01000029_01941376_01941659	10.092	2.48619	1.13e-10	1.17e-08			_	_
	CI01000006_09004949_09014310	5.00382	7.88431	1.17e-10	1.2e-08		gi|966714648|gb|KTG46886.1| hypothetical protein cypCar_00004110 [Cyprinus carpio]	K05768	_
	CI01000319_03552377_03560881	10.0806	2.47498	1.2e-10	1.23e-08		gi|1025384285|ref|XP_016401392.1| PREDICTED: four and a half LIM domains protein 3-like [Sinocyclocheilus rhinocerous]<>gi|1025384289|ref|XP_016401393.1| PREDICTED: four and a half LIM domains protein 3-like [Sinocyclocheilus rhinocerous]<>gi|1025384293|ref|XP_016401394.1| PREDICTED: four and a half LIM domains protein 3-like [Sinocyclocheilus rhinocerous]<>gi|1025384297|ref|XP_016401395.1| PREDI…	_	_
	CI01000340_15539153_15542490	10.0691	2.46369	1.29e-10	1.32e-08		gi|966702535|gb|KTG34776.1| hypothetical protein cypCar_00007053 [Cyprinus carpio]	_	_
	CI01000228_00404742_00408753	4.96934	8.89924	1.3e-10	1.33e-08		gi|966671453|gb|KTG04834.1| hypothetical protein cypCar_00035137 [Cyprinus carpio]	K12561	_
	CI01000214_00340892_00350578	7.34832	2.83119	1.31e-10	1.33e-08		gi|1025090142|ref|XP_016342524.1| PREDICTED: uncharacterized protein LOC107689131 [Sinocyclocheilus anshuiensis]	_	_
	CI01000153_00189131_00203614	7.33934	2.82237	1.38e-10	1.4e-08		gi|1024951629|ref|XP_016296552.1| PREDICTED: low-density lipoprotein receptor-related protein 5-like [Sinocyclocheilus anshuiensis]	K03068	_
	CI01000055_05543598_05551750	-5.35012	4.69587	1.41e-10	1.43e-08		gi|1020524676|ref|XP_016101863.1| PREDICTED: carboxypeptidase A1-like [Sinocyclocheilus grahami]	K08779	_
	CI01000016_05781693_05789936	-5.80899	3.948	1.43e-10	1.44e-08		gi|966641533|gb|KTF76447.1| hypothetical protein cypCar_00034878 [Cyprinus carpio]	_	_
	CI01000154_00012002_00016527	10.0575	2.45231	1.48e-10	1.48e-08		gi|1024935117|ref|XP_016318578.1| PREDICTED: guanylyl cyclase-activating protein 1-like [Sinocyclocheilus anshuiensis]	K08328	_
	CI01000043_04818939_04819238	5.46557	4.2591	1.49e-10	1.49e-08			_	_
	CI01000203_00215147_00219630	-4.93181	9.59868	1.59e-10	1.58e-08		gi|1025098370|ref|XP_016344743.1| PREDICTED: protein C-ets-2-like [Sinocyclocheilus anshuiensis]	K02678	_
	CI01000006_03327370_03334117	5.08235	5.80281	1.66e-10	1.65e-08		gi|1024994709|ref|XP_016317000.1| PREDICTED: ras and Rab interactor 2-like [Sinocyclocheilus anshuiensis]<>gi|1024994711|ref|XP_016317001.1| PREDICTED: ras and Rab interactor 2-like [Sinocyclocheilus anshuiensis]<>gi|1024994715|ref|XP_016317002.1| PREDICTED: ras and Rab interactor 2-like [Sinocyclocheilus anshuiensis]<>gi|1024994719|ref|XP_016317003.1| PREDICTED: ras and Rab interactor 2-like [Si…	_	_
	CI01000333_00370455_00387579	-5.10767	5.7672	1.73e-10	1.71e-08		gi|1025301029|ref|XP_016381284.1| PREDICTED: tetratricopeptide repeat protein 39A [Sinocyclocheilus rhinocerous]	_	_
	CI01000146_01393005_01411381	5.08077	5.53944	1.83e-10	1.8e-08		gi|1024943091|ref|XP_016360736.1| PREDICTED: rab11 family-interacting protein 1 isoform X2 [Sinocyclocheilus anshuiensis]	K12484	_
	CI01000066_01479854_01525318	-5.15385	5.33093	1.87e-10	1.84e-08		gi|1024963999|ref|XP_016303139.1| PREDICTED: diacylglycerol kinase iota-like isoform X1 [Sinocyclocheilus anshuiensis]	K00901	_
	CI01000018_06370452_06384112	-4.9128	9.0967	1.88e-10	1.84e-08		gi|1042322318|ref|XP_017308749.1| PREDICTED: high affinity cAMP-specific 3',5'-cyclic phosphodiesterase 7A isoform X6 [Ictalurus punctatus]	K18436	_
	CI01000053_00328885_00333481	-5.09507	5.53452	1.96e-10	1.91e-08		gi|1025351594|ref|XP_016394998.1| PREDICTED: delta-like protein C isoform X2 [Sinocyclocheilus rhinocerous]	K06051	_
	CI01000043_05047820_05058629	-5.65512	4.01439	2.02e-10	1.96e-08		gi|1025079039|ref|XP_016339492.1| PREDICTED: polycystic kidney disease protein 1-like 2 [Sinocyclocheilus anshuiensis]	K04988	_
	CI01000315_00272349_00277104	5.32776	4.4681	2.17e-10	2.11e-08		gi|966687264|gb|KTG20199.1| hypothetical protein cypCar_00028867 [Cyprinus carpio]	_	_
	CI01000321_03634967_03638070	6.62056	3.01976	2.18e-10	2.11e-08		gi|1025326992|ref|XP_016388338.1| PREDICTED: C3a anaphylatoxin chemotactic receptor-like [Sinocyclocheilus rhinocerous]	_	_
	CI01000071_00341553_00341786	5.5823	3.73326	2.27e-10	2.19e-08			_	_
	CI01000092_03103762_03184280	-5.02372	5.87723	2.39e-10	2.3e-08		gi|688587046|ref|XP_009289749.1| PREDICTED: Down syndrome cell adhesion molecule homolog isoform X1 [Danio rerio]	K06767	_
	CI01180000_11438606_11440646	9.97376	2.37004	2.41e-10	2.31e-08		gi|929265709|ref|XP_014009399.1| PREDICTED: myozenin 1-like isoform X1 [Salmo salar]	_	_
	CI01000300_00555476_00647781	7.2463	2.73104	2.54e-10	2.43e-08		gi|1020403670|ref|XP_016105135.1| PREDICTED: glutamate receptor ionotropic, NMDA 2A-like [Sinocyclocheilus grahami]<>gi|1020403672|ref|XP_016105141.1| PREDICTED: glutamate receptor ionotropic, NMDA 2A-like [Sinocyclocheilus grahami]	K05209	_
	CI01000219_00516191_00524940	5.23362	4.73522	2.56e-10	2.45e-08		gi|1025244037|ref|XP_016367285.1| PREDICTED: B-cell receptor CD22-like [Sinocyclocheilus rhinocerous]	K06467	_
	CI01000222_00451564_00458980	-5.19736	4.9819	2.63e-10	2.5e-08		gi|1025005381|ref|XP_016321783.1| PREDICTED: mucolipin-1-like [Sinocyclocheilus anshuiensis]	K04992	_
	CI01000139_00208347_00223712	5.29236	4.43367	2.74e-10	2.6e-08		gi|1025054930|ref|XP_016331396.1| PREDICTED: NUAK family SNF1-like kinase 1 [Sinocyclocheilus anshuiensis]	K08800	_
	CI01000343_00617627_00630920	9.94891	2.34566	2.78e-10	2.63e-08		gi|1025108416|ref|XP_016347521.1| PREDICTED: ras and Rab interactor 2-like [Sinocyclocheilus anshuiensis]	_	_
	CI01000117_00218076_00225659	-5.31279	4.44166	2.79e-10	2.63e-08		gi|1025276998|ref|XP_016376218.1| PREDICTED: Golgi phosphoprotein 3-like [Sinocyclocheilus rhinocerous]<>gi|1025277002|ref|XP_016376220.1| PREDICTED: Golgi phosphoprotein 3-like [Sinocyclocheilus rhinocerous]	K15620	_
	CI01000142_00497199_00499022	4.86217	7.8929	2.92e-10	2.75e-08		gi|1025208445|ref|XP_016428062.1| PREDICTED: H-2 class II histocompatibility antigen, I-E beta chain-like [Sinocyclocheilus rhinocerous]	K06752	biological_process:antigen processing and presentation(GO:0019882);cellular_component:membrane part(GO:0044425)
	CI01111733_00002385_00003170	-5.12552	5.12126	2.96e-10	2.77e-08		gi|346652550|gb|AEO44578.1| hsp70 protein [Cyprinus carpio]	K03283	_
	CI01000001_04395469_04399381	-7.03733	2.7369	3.01e-10	2.81e-08		gi|1025244181|ref|XP_016367320.1| PREDICTED: peptidyl-prolyl cis-trans isomerase FKBP1A [Sinocyclocheilus rhinocerous]	K09568	biological_process:protein folding(GO:0006457);cellular_component:sarcoplasmic reticulum membrane(GO:0033017);molecular_function:FK506 binding(GO:0005528);biological_process:protein peptidyl-prolyl isomerization(GO:0000413);molecular_function:peptidyl-prolyl cis-trans isomerase activity(GO:0003755)
	CI01000075_01159479_01160597	-4.87753	7.4619	3.03e-10	2.83e-08		gi|1025084231|ref|XP_016340905.1| PREDICTED: Krueppel-like factor 2 isoform X1 [Sinocyclocheilus anshuiensis]	K17845	_
	CI01000304_17586057_17586464	-5.09219	5.21313	3.05e-10	2.83e-08			_	_
	CI01000187_00790581_00820900	5.04235	5.46057	3.08e-10	2.85e-08		gi|1025235670|ref|XP_016365010.1| PREDICTED: rap guanine nucleotide exchange factor 1-like isoform X4 [Sinocyclocheilus rhinocerous]	K06277	_
	CI01000139_00801423_00814780	5.0394	5.45772	3.13e-10	2.9e-08		gi|1020578173|ref|XP_016115083.1| PREDICTED: pseudopodium-enriched atypical kinase 1 [Sinocyclocheilus grahami]	K17538	_
	CI01000054_12106998_12109333	5.04915	5.33462	3.17e-10	2.92e-08		gi|1025360724|ref|XP_016402397.1| PREDICTED: aquaporin-11 [Sinocyclocheilus rhinocerous]	K09870	_
	CI01000001_05575469_05577709	4.91489	6.35444	3.18e-10	2.93e-08		gi|1025267233|ref|XP_016373573.1| PREDICTED: 3-beta-hydroxysteroid-Delta(8),Delta(7)-isomerase-like [Sinocyclocheilus rhinocerous]<>gi|1025267237|ref|XP_016373575.1| PREDICTED: 3-beta-hydroxysteroid-Delta(8),Delta(7)-isomerase-like [Sinocyclocheilus rhinocerous]	K01824	_
	CI01000030_01260932_01266392	5.59792	3.5318	3.32e-10	3.05e-08		gi|1024950372|ref|XP_016295888.1| PREDICTED: vascular cell adhesion protein 1-like [Sinocyclocheilus anshuiensis]	K06527	_
	CI01000009_02167959_02200058	9.91081	2.30829	3.47e-10	3.17e-08		gi|966657690|gb|KTF92544.1| hypothetical protein cypCar_00003812, partial [Cyprinus carpio]	_	_
	CI01000113_02293534_02295639	-5.04595	5.28271	3.5e-10	3.19e-08		gi|1020527846|ref|XP_016103559.1| PREDICTED: prostaglandin E2 receptor EP1 subtype-like [Sinocyclocheilus grahami]<>gi|1020527848|ref|XP_016103560.1| PREDICTED: prostaglandin E2 receptor EP1 subtype-like [Sinocyclocheilus grahami]	K04258	_
	CI01000030_05477128_05482150	-4.95996	5.85104	3.51e-10	3.19e-08		gi|1025177725|ref|XP_016359070.1| PREDICTED: complement factor H-like isoform X1 [Sinocyclocheilus anshuiensis]	_	_
	CI01000066_00002211_00003080	-4.80413	9.85457	3.58e-10	3.24e-08		gi|1020407220|ref|XP_016121575.1| PREDICTED: uncharacterized protein LOC107580374 [Sinocyclocheilus grahami]	_	_
	CI01000016_06069691_06109173	7.18745	2.67335	3.58e-10	3.24e-08		gi|1025005909|ref|XP_016321947.1| PREDICTED: integrin alpha-10-like [Sinocyclocheilus anshuiensis]	_	_
	CI01000304_06867535_06870134	5.44531	3.78824	3.72e-10	3.35e-08		gi|1025270135|ref|XP_016374347.1| PREDICTED: protein FAM166B-like [Sinocyclocheilus rhinocerous]	_	_
	CI01000030_04229653_04232271	-5.2294	4.4744	3.8e-10	3.42e-08		gi|1025305466|ref|XP_016382495.1| PREDICTED: SHC-transforming protein 2-like isoform X1 [Sinocyclocheilus rhinocerous]	K17447	_
	CI01000469_00036847_00041514	6.53118	2.93222	3.87e-10	3.47e-08		gi|657603359|gb|AID53082.1| cytosolic sulfotransferase 1 [Gobiocypris rarus]	K01025	_
	CI01000055_04565665_04574485	5.08268	4.73936	3.88e-10	3.47e-08		gi|1020480706|ref|XP_016145794.1| PREDICTED: putative interleukin-17 receptor E-like [Sinocyclocheilus grahami]	_	_
	CI01000320_03878507_03888507	-5.25413	4.3851	4.1e-10	3.66e-08		gi|1025121537|ref|XP_016412861.1| PREDICTED: thyroid hormone receptor beta-like isoform X1 [Sinocyclocheilus rhinocerous]	K08362	_
	CI01000311_00251598_00254804	-4.7713	10.3618	4.24e-10	3.77e-08		gi|1025083814|ref|XP_016340799.1| PREDICTED: ornithine decarboxylase-like isoform X1 [Sinocyclocheilus anshuiensis]	K01581	_
	CI01000082_01672709_01673776	6.51432	2.91572	4.28e-10	3.79e-08		gi|1020458220|ref|XP_016134442.1| PREDICTED: protein arginine N-methyltransferase 6 [Sinocyclocheilus grahami]	K11437	_
	CI01044758_00001408_00002262	-4.92036	5.84738	4.35e-10	3.85e-08		gi|1024959332|ref|XP_016300658.1| PREDICTED: low choriolytic enzyme-like [Sinocyclocheilus anshuiensis]	_	_
	CI01000055_06191356_06221464	4.7995	7.63991	4.6e-10	4.06e-08		gi|1025197888|ref|XP_016425213.1| PREDICTED: LOW QUALITY PROTEIN: interferon-induced GTP-binding protein Mx3-like [Sinocyclocheilus rhinocerous]	_	_
	CI01000032_00734946_00744860	-5.52676	3.89052	4.63e-10	4.07e-08		gi|1025208884|ref|XP_016428188.1| PREDICTED: transcription regulator protein BACH2-like [Sinocyclocheilus rhinocerous]	_	_
	CI01000113_00511782_00515713	4.79023	7.96208	4.64e-10	4.07e-08		gi|1025200188|ref|XP_016425841.1| PREDICTED: intercellular adhesion molecule 1-like [Sinocyclocheilus rhinocerous]	_	_
	CI01000055_05536718_05540416	-9.86052	2.30675	4.69e-10	4.1e-08		gi|1020524676|ref|XP_016101863.1| PREDICTED: carboxypeptidase A1-like [Sinocyclocheilus grahami]	K08779	_
	CI01000304_10093597_10099497	-4.7931	7.77555	4.81e-10	4.2e-08		gi|1025411535|ref|XP_016410763.1| PREDICTED: lysine-specific demethylase 6B-like isoform X1 [Sinocyclocheilus rhinocerous]<>gi|1025411539|ref|XP_016410764.1| PREDICTED: lysine-specific demethylase 6B-like isoform X1 [Sinocyclocheilus rhinocerous]<>gi|1025411543|ref|XP_016410766.1| PREDICTED: lysine-specific demethylase 6B-like isoform X1 [Sinocyclocheilus rhinocerous]<>gi|1025411547|ref|XP_016410…	K11448	_
	CI01000010_07135276_07196633	9.8584	2.25692	5.07e-10	4.4e-08		gi|1025333024|ref|XP_016390016.1| PREDICTED: uncharacterized protein LOC107725312 [Sinocyclocheilus rhinocerous]	K16359	_
	CI01000055_01897725_01900568	-4.75012	9.71763	5.1e-10	4.42e-08		gi|1020408220|ref|XP_016122687.1| PREDICTED: monocarboxylate transporter 4-like [Sinocyclocheilus grahami]<>gi|1020408222|ref|XP_016122690.1| PREDICTED: monocarboxylate transporter 4-like [Sinocyclocheilus grahami]	K08180	_
	CI01000054_04411682_04448848	-4.82017	6.6933	5.35e-10	4.62e-08		gi|1025317720|ref|XP_016385837.1| PREDICTED: nesprin-1-like [Sinocyclocheilus rhinocerous]	_	_
	CI01023825_00000669_00003199	4.81555	6.70352	5.46e-10	4.7e-08		gi|1025374778|ref|XP_016398824.1| PREDICTED: anion exchange protein 2-like [Sinocyclocheilus rhinocerous]	K06573	_
	CI01000062_03428921_03431581	-5.94514	3.12601	5.5e-10	4.72e-08		gi|1040667120|ref|XP_017207103.1| PREDICTED: tuberoinfundibular peptide of 39 residues isoform X1 [Danio rerio]	_	biological_process:cAMP biosynthetic process(GO:0006171);molecular_function:receptor agonist activity(GO:0048018)
	CI01000080_00597523_00605227	5.00092	4.86015	5.7e-10	4.88e-08		gi|1025211351|ref|XP_016428824.1| PREDICTED: lipoma HMGIC fusion partner-like 2 protein [Sinocyclocheilus rhinocerous]<>gi|1025211355|ref|XP_016428825.1| PREDICTED: lipoma HMGIC fusion partner-like 2 protein [Sinocyclocheilus rhinocerous]	_	_
	CI01000054_08252231_08263823	9.83146	2.23054	5.92e-10	5.06e-08			_	_
	CI01000026_10721380_10724373	-6.92124	2.62559	6.17e-10	5.26e-08		gi|61806624|ref|NP_001013544.1| six-cysteine containing astacin protease 3 precursor [Danio rerio]<>gi|60552332|gb|AAH90904.1| Six-cysteine containing astacin protease 3 [Danio rerio]<>gi|182890808|gb|AAI65449.1| C6ast3 protein [Danio rerio]	_	molecular_function:metalloendopeptidase activity(GO:0004222);biological_process:proteolysis(GO:0006508);molecular_function:zinc ion binding(GO:0008270)
	CI01000105_00154787_00207150	5.42389	3.57918	6.22e-10	5.28e-08		gi|1024920960|ref|XP_016346008.1| PREDICTED: protein ABHD17C [Sinocyclocheilus anshuiensis]	_	molecular_function:hydrolase activity(GO:0016787)
	CI01000005_04823360_04823708	-5.71055	3.29274	6.26e-10	5.31e-08		gi|54260402|dbj|BAD61007.1| heat shock protein 30 kDa [Carassius auratus]	_	_
	CI01000327_01644946_01696545	4.94934	5.14235	6.38e-10	5.39e-08		gi|1024978455|ref|XP_016310790.1| PREDICTED: bone morphogenetic protein 6-like isoform X2 [Sinocyclocheilus anshuiensis]	K16620	_
	CI01000046_06223230_06251304	-5.14786	4.3959	6.42e-10	5.42e-08		gi|1024952535|ref|XP_016297032.1| PREDICTED: caskin-1-like isoform X4 [Sinocyclocheilus anshuiensis]	_	_
	CI01000027_01303308_01319462	6.10488	3.06456	6.88e-10	5.78e-08		gi|562873353|ref|XP_006164579.1| PREDICTED: COUP transcription factor 1 [Tupaia chinensis]	K08702	biological_process:steroid hormone mediated signaling pathway(GO:0043401);molecular_function:zinc ion binding(GO:0008270);biological_process:regulation of transcription, DNA-templated(GO:0006355);molecular_function:sequence-specific DNA binding(GO:0043565);biological_process:visual perception(GO:0007601);biological_process:response to retinoic acid(GO:0032526);molecular_function:steroid hormone r…
	CI01000026_01587300_01603806	9.80401	2.20367	6.94e-10	5.8e-08		gi|1020426314|ref|XP_016131707.1| PREDICTED: cytochrome P450 26B1 [Sinocyclocheilus grahami]	K12664	_
	CI01000054_12811634_12819065	-9.80121	2.25005	6.94e-10	5.8e-08		gi|1025246518|ref|XP_016367966.1| PREDICTED: potassium/sodium hyperpolarization-activated cyclic nucleotide-gated channel 1-like [Sinocyclocheilus rhinocerous]	_	_
	CI01000004_13043279_13051835	7.08371	2.57178	6.99e-10	5.83e-08			_	_
	CI01000243_00284609_00301594	5.88531	3.24647	7.06e-10	5.88e-08		gi|1020577552|ref|XP_016114959.1| PREDICTED: uncharacterized protein LOC107573032 [Sinocyclocheilus grahami]	_	_
	CI01000033_00227674_00228681	-4.86199	5.68504	7.12e-10	5.92e-08		gi|1025129438|ref|XP_016414285.1| PREDICTED: cdc42 effector protein 4-like [Sinocyclocheilus rhinocerous]<>gi|1025129444|ref|XP_016414286.1| PREDICTED: cdc42 effector protein 4-like [Sinocyclocheilus rhinocerous]	_	_
	CI01180000_09046542_09058939	-5.67713	3.56769	7.31e-10	6.05e-08		gi|1020477900|ref|XP_016144299.1| PREDICTED: ammonium transporter Rh type A-like isoform X1 [Sinocyclocheilus grahami]<>gi|1020477902|ref|XP_016144300.1| PREDICTED: ammonium transporter Rh type A-like isoform X1 [Sinocyclocheilus grahami]	K06580	_
	CI01000325_04584231_04595363	-6.89306	2.59863	7.44e-10	6.15e-08		gi|1020468279|ref|XP_016139168.1| PREDICTED: cytochrome P450 2J5-like [Sinocyclocheilus grahami]	K17856	molecular_function:heme binding(GO:0020037);molecular_function:oxidoreductase activity, acting on paired donors, with incorporation or reduction of molecular oxygen(GO:0016705);molecular_function:monooxygenase activity(GO:0004497);molecular_function:iron ion binding(GO:0005506);molecular_function:electron carrier activity(GO:0009055);biological_process:oxidation-reduction process(GO:0055114)
	CI01000016_05960829_05963788	4.80858	5.95145	7.46e-10	6.15e-08		gi|966653116|gb|KTF88018.1| hypothetical protein cypCar_00030003 [Cyprinus carpio]	K00787	_
	CI01000304_08819813_08827793	4.73125	7.10029	7.74e-10	6.37e-08		gi|966663948|gb|KTF98037.1| hypothetical protein cypCar_00007666 [Cyprinus carpio]	K16545	_
	CI01000054_02200143_02200643	6.08169	3.04193	7.88e-10	6.47e-08		gi|1025317809|ref|XP_016385866.1| PREDICTED: uncharacterized protein LOC107722145 isoform X1 [Sinocyclocheilus rhinocerous]	_	_
	CI01000027_04464282_04466128	-5.05252	4.50675	8.11e-10	6.63e-08			_	_
	CI01000010_01050815_01053323	-5.43572	3.80291	8.17e-10	6.67e-08		gi|1024990229|ref|XP_016315211.1| PREDICTED: LOW QUALITY PROTEIN: organic solute transporter subunit alpha-like [Sinocyclocheilus anshuiensis]	K14360	_
	CI01000023_00184327_00190081	5.05034	4.55746	8.33e-10	6.78e-08		gi|1025038231|ref|XP_016326873.1| PREDICTED: transmembrane protease serine 6 [Sinocyclocheilus anshuiensis]	K09637	_
	CI01000004_04315741_04317415	-4.99241	4.85732	8.64e-10	7.02e-08		gi|31581593|ref|NP_853537.1| glutamine synthetase 1 [Danio rerio]<>gi|31419181|gb|AAH53146.1| Glutamate-ammonia ligase (glutamine synthase) a [Danio rerio]<>gi|213624635|gb|AAI71369.1| Glutamate-ammonia ligase (glutamine synthase) a [Danio rerio]<>gi|213625801|gb|AAI71365.1| Glutamate-ammonia ligase (glutamine synthase) a [Danio rerio]	K01915	molecular_function:glutamate-ammonia ligase activity(GO:0004356);molecular_function:ATP binding(GO:0005524);biological_process:glutamine biosynthetic process(GO:0006542)
	CI01000027_07690842_07692012	-4.72578	6.86157	8.88e-10	7.19e-08		gi|1025296795|ref|XP_016380128.1| PREDICTED: C-type lectin domain family 9 member A-like isoform X1 [Sinocyclocheilus rhinocerous]	_	_
	CI01000325_10266709_10324239	-5.04996	4.40663	9.78e-10	7.89e-08		gi|1025303361|ref|XP_016381913.1| PREDICTED: serine/threonine-protein kinase MRCK alpha-like isoform X9 [Sinocyclocheilus rhinocerous]	K16307	_
	CI01000018_07011537_07045271	-4.70662	6.87249	9.86e-10	7.93e-08		gi|688614401|ref|XP_009295755.1| PREDICTED: mitogen-activated protein kinase kinase kinase 15 isoform X1 [Danio rerio]	K13986	_
	CI01000047_03855710_03868781	4.64937	9.14132	9.98e-10	8.01e-08		gi|1025249665|ref|XP_016368826.1| PREDICTED: integrin alpha-M-like [Sinocyclocheilus rhinocerous]	K06462	_
	CI01000030_09861443_09865523	4.73343	6.17931	1.03e-09	8.22e-08		gi|1025096888|ref|XP_016344355.1| PREDICTED: T-cell surface antigen CD2-like [Sinocyclocheilus anshuiensis]	_	_
	CI01000340_07486593_07487826	-6.18168	2.81012	1.04e-09	8.29e-08		gi|1025320654|ref|XP_016386629.1| PREDICTED: leucine-rich repeat-containing protein 15-like [Sinocyclocheilus rhinocerous]	_	_
	CI01000003_01632757_01671893	-4.64048	8.65987	1.12e-09	8.9e-08		gi|1025225726|ref|XP_016368297.1| PREDICTED: epidermal growth factor receptor-like isoform X1 [Sinocyclocheilus rhinocerous]	K04361	_
	CI01000009_09031859_09038439	9.71838	2.11995	1.13e-09	9e-08		gi|1020508333|ref|XP_016093200.1| PREDICTED: tumor necrosis factor-inducible gene 6 protein [Sinocyclocheilus grahami]	K19018	_
	CI01000082_04619826_04620686	-5.02279	4.38056	1.16e-09	9.16e-08		gi|1020401343|ref|XP_016092738.1| PREDICTED: CCAAT/enhancer-binding protein delta-like [Sinocyclocheilus grahami]	K10050	_
	CI01000152_02190690_02206511	-4.6871	6.79445	1.16e-09	9.2e-08		gi|966714170|gb|KTG46408.1| hypothetical protein cypCar_00004355 [Cyprinus carpio]	_	_
	CI01000027_06373043_06379322	5.39499	3.33469	1.19e-09	9.37e-08		gi|1025083754|ref|XP_016340781.1| PREDICTED: serine/threonine-protein kinase Sgk1-like [Sinocyclocheilus anshuiensis]	K13302	biological_process:protein phosphorylation(GO:0006468);molecular_function:ATP binding(GO:0005524);molecular_function:protein serine/threonine kinase activity(GO:0004674)
	CI01000343_01222169_01224456	4.87233	4.8553	1.19e-09	9.39e-08		gi|966649100|gb|KTF84010.1| hypothetical protein cypCar_00038499 [Cyprinus carpio]	_	_
	CI01000013_01007844_01029438	5.26138	3.60973	1.21e-09	9.53e-08		gi|1025277074|ref|XP_016376240.1| PREDICTED: semaphorin-4B-like [Sinocyclocheilus rhinocerous]<>gi|1025277078|ref|XP_016376241.1| PREDICTED: semaphorin-4B-like [Sinocyclocheilus rhinocerous]	K06521	_
	CI01000195_00381134_00383203	9.7036	2.10552	1.23e-09	9.64e-08		gi|966701103|gb|KTG33344.1| hypothetical protein cypCar_00046195, partial [Cyprinus carpio]	_	_
	CI01000325_10370275_10385142	-4.64954	7.34669	1.24e-09	9.68e-08		gi|966663818|gb|KTF97924.1| hypothetical protein cypCar_00004439 [Cyprinus carpio]	_	_
	CI01000072_04577347_04600719	4.77149	5.43216	1.27e-09	9.88e-08		gi|1020487587|ref|XP_016149451.1| PREDICTED: ubiquitin-associated and SH3 domain-containing protein B-like [Sinocyclocheilus grahami]	K18993	_
	CI01000086_00629905_00632087	4.69977	6.08295	1.27e-09	9.89e-08		gi|530323579|gb|AGT19511.1| hepcidin [Hypophthalmichthys molitrix]<>gi|555432139|gb|AGZ15359.1| hepcidin [Hypophthalmichthys molitrix]<>gi|927030810|gb|ALD62533.1| hepcidin [Mylopharyngodon piceus]	_	_
	CI01000304_07051182_07056250	-9.68788	2.14196	1.34e-09	1.04e-07		gi|1025077339|ref|XP_016339027.1| PREDICTED: ras-related protein Rab-36-like [Sinocyclocheilus anshuiensis]	_	_
	CI01000030_03060378_03062683	-5.57764	3.4721	1.38e-09	1.07e-07		gi|1025305664|ref|XP_016382552.1| PREDICTED: duodenase-1-like [Sinocyclocheilus rhinocerous]	_	_
	CI01000325_03259833_03264532	-5.8005	2.98756	1.39e-09	1.07e-07		gi|1025299900|ref|XP_016380978.1| PREDICTED: sodium/bile acid cotransporter 4-like [Sinocyclocheilus rhinocerous]	K14344	_
	CI01000008_02654474_02655490	-4.76252	5.55229	1.4e-09	1.08e-07		gi|966638233|gb|KTF73337.1| hypothetical protein cypCar_00041098 [Cyprinus carpio]	_	_
	CI01000005_05157829_05163163	5.19146	3.7084	1.41e-09	1.08e-07		gi|1025220403|ref|XP_016422700.1| PREDICTED: BAG family molecular chaperone regulator 2 [Sinocyclocheilus rhinocerous]	_	_
	CI01000034_02688043_02705526	-6.13168	2.76235	1.45e-09	1.11e-07		gi|1025123132|ref|XP_016350185.1| PREDICTED: microtubule-associated protein tau-like isoform X1 [Sinocyclocheilus anshuiensis]<>gi|1025123138|ref|XP_016350187.1| PREDICTED: microtubule-associated protein tau-like isoform X1 [Sinocyclocheilus anshuiensis]<>gi|1025123144|ref|XP_016350188.1| PREDICTED: microtubule-associated protein tau-like isoform X1 [Sinocyclocheilus anshuiensis]<>gi|1025123150|r…	K04380	_
	CI01000059_07302561_07355925	-6.13168	2.76235	1.45e-09	1.11e-07		gi|1024971911|ref|XP_016307406.1| PREDICTED: ankyrin-1-like isoform X1 [Sinocyclocheilus anshuiensis]	K10380	_
	CI01000039_04569279_04580845	9.68867	2.09094	1.46e-09	1.11e-07		gi|1025151346|ref|XP_016416602.1| PREDICTED: dnaJ homolog subfamily B member 5-like isoform X1 [Sinocyclocheilus rhinocerous]<>gi|1025151351|ref|XP_016416603.1| PREDICTED: dnaJ homolog subfamily B member 5-like isoform X1 [Sinocyclocheilus rhinocerous]	K09511	_
	CI01000051_06041891_06047349	-5.19227	3.92074	1.52e-09	1.16e-07		gi|1025186499|ref|XP_016422452.1| PREDICTED: serine/threonine-protein kinase Nek2 isoform X1 [Sinocyclocheilus rhinocerous]	K08857	biological_process:protein phosphorylation(GO:0006468);molecular_function:ATP binding(GO:0005524);molecular_function:protein serine/threonine kinase activity(GO:0004674)
	CI01000321_04524751_04530395	-5.78593	2.97365	1.53e-09	1.16e-07		gi|1025397970|ref|XP_016407113.1| PREDICTED: circadian-associated transcriptional repressor-like [Sinocyclocheilus rhinocerous]	_	_
	CI01000090_01139147_01144211	-4.61719	7.26441	1.57e-09	1.19e-07		gi|1025288432|ref|XP_016376722.1| PREDICTED: leukotriene-B(4) omega-hydroxylase 2-like [Sinocyclocheilus rhinocerous]<>gi|1025288436|ref|XP_016376727.1| PREDICTED: leukotriene-B(4) omega-hydroxylase 2-like [Sinocyclocheilus rhinocerous]	K17726	molecular_function:heme binding(GO:0020037);molecular_function:oxidoreductase activity, acting on paired donors, with incorporation or reduction of molecular oxygen(GO:0016705);molecular_function:monooxygenase activity(GO:0004497);molecular_function:iron ion binding(GO:0005506);molecular_function:electron carrier activity(GO:0009055);biological_process:oxidation-reduction process(GO:0055114)
	CI01180000_08123227_08149912	-4.62383	6.97044	1.6e-09	1.21e-07		gi|1025329675|ref|XP_016389086.1| PREDICTED: actin-binding LIM protein 1-like [Sinocyclocheilus rhinocerous]	K07520	_
	CI01000033_00295796_00298229	-6.11462	2.74607	1.62e-09	1.22e-07		gi|1024971319|ref|XP_016307083.1| PREDICTED: C-factor-like [Sinocyclocheilus anshuiensis]	_	_
	CI01000304_08582404_08594691	-6.11462	2.74607	1.62e-09	1.22e-07		gi|1020419687|ref|XP_016128835.1| PREDICTED: dematin-like isoform X2 [Sinocyclocheilus grahami]	_	_
	CI01000105_01177457_01178043	4.80317	4.95097	1.68e-09	1.26e-07		gi|1025252077|ref|XP_016369467.1| PREDICTED: serum amyloid A-2 protein isoform X1 [Sinocyclocheilus rhinocerous]	_	_
	CI01000333_00319502_00325574	-4.86836	4.8076	1.7e-09	1.27e-07		gi|1025300756|ref|XP_016381206.1| PREDICTED: erythropoietin receptor-like [Sinocyclocheilus rhinocerous]	_	_
	CI01000055_01894794_01895020	-6.75379	2.46563	1.75e-09	1.31e-07			_	_
	CI01000018_06021105_06025859	-4.54914	11.673	1.76e-09	1.31e-07		gi|194303474|gb|ACF41166.1| C-type lysozyme [Ctenopharyngodon idella]<>gi|251815108|emb|CAZ68118.1| c-type lysozyme [Ctenopharyngodon idella]	K01185	_
	CI01000016_07178060_07180135	5.20185	3.55211	1.78e-09	1.33e-07		gi|1025194854|ref|XP_016424404.1| PREDICTED: uncharacterized protein LOC107752851 [Sinocyclocheilus rhinocerous]	_	_
	CI01000006_02665949_02677083	-4.56834	8.38315	1.79e-09	1.33e-07		gi|1020513301|ref|XP_016095840.1| PREDICTED: RAS guanyl-releasing protein 2-like [Sinocyclocheilus grahami]	K12361	_
	CI01000027_05757143_05758496	5.01384	4.05825	1.88e-09	1.39e-07		gi|966667530|gb|KTG01000.1| hypothetical protein cypCar_00006017 [Cyprinus carpio]	K07992	_
	CI01000340_06704533_06711160	5.14104	3.65962	1.89e-09	1.4e-07		gi|1020498613|ref|XP_016088010.1| PREDICTED: 3-keto-steroid reductase-like [Sinocyclocheilus grahami]<>gi|1020498615|ref|XP_016088011.1| PREDICTED: 3-keto-steroid reductase-like [Sinocyclocheilus grahami]	K13373	_
	CI01000411_00046428_00074876	5.09985	3.76891	1.94e-09	1.43e-07		gi|1024954971|ref|XP_016298339.1| PREDICTED: complement C3-like [Sinocyclocheilus anshuiensis]	_	_
	CI01000059_00991306_01000173	-4.72606	5.22632	1.98e-09	1.46e-07		gi|1020484863|ref|XP_016148005.1| PREDICTED: protein prune homolog 2-like [Sinocyclocheilus grahami]	K18449	_
	CI01000345_00724841_00729053	-5.09402	3.97449	2e-09	1.46e-07		gi|992190511|ref|XP_015459465.1| PREDICTED: death domain-containing protein 1 [Astyanax mexicanus]	_	_
	CI01000010_05494740_05504597	6.91259	2.4047	2.01e-09	1.47e-07		gi|1025243519|ref|XP_016367148.1| PREDICTED: breast cancer anti-estrogen resistance protein 3-like isoform X1 [Sinocyclocheilus rhinocerous]	_	_
	CI01000307_00007058_00022513	5.30918	3.25161	2.04e-09	1.49e-07		gi|1025320835|ref|XP_016386677.1| PREDICTED: solute carrier family 2, facilitated glucose transporter member 9 [Sinocyclocheilus rhinocerous]<>gi|1025320839|ref|XP_016386678.1| PREDICTED: solute carrier family 2, facilitated glucose transporter member 9 [Sinocyclocheilus rhinocerous]<>gi|1025320843|ref|XP_016386679.1| PREDICTED: solute carrier family 2, facilitated glucose transporter member 9 [S…	_	_
	CI01000016_06720165_06726223	-9.62085	2.07819	2.07e-09	1.51e-07		gi|1025072536|ref|XP_016337685.1| PREDICTED: stathmin-2-like [Sinocyclocheilus anshuiensis]<>gi|1025115983|ref|XP_016411810.1| PREDICTED: stathmin-2-like [Sinocyclocheilus rhinocerous]<>gi|1025115989|ref|XP_016411811.1| PREDICTED: stathmin-2-like [Sinocyclocheilus rhinocerous]	_	_
	CI01000039_06214039_06214808	5.23365	3.39484	2.12e-09	1.54e-07		gi|1020612839|ref|XP_016120009.1| PREDICTED: uncharacterized protein LOC107578576 [Sinocyclocheilus grahami]	_	_
	CI01000190_00818872_00919765	6.90043	2.39285	2.16e-09	1.57e-07		gi|688538532|ref|XP_009296995.1| PREDICTED: eph receptor A4b isoform X1 [Danio rerio]	K05105	biological_process:negative regulation of collateral sprouting of intact axon in response to injury(GO:0048685);biological_process:ephrin receptor signaling pathway(GO:0048013);biological_process:protein phosphorylation(GO:0006468);molecular_function:ephrin receptor activity(GO:0005003);biological_process:negative regulation of axon extension(GO:0030517);cellular_component:integral component of p…
	CI01000330_01348143_01348817	4.78193	4.70973	2.19e-09	1.59e-07		gi|1025243293|ref|XP_016367085.1| PREDICTED: mixed lineage kinase domain-like protein isoform X1 [Sinocyclocheilus rhinocerous]<>gi|1025243297|ref|XP_016367086.1| PREDICTED: mixed lineage kinase domain-like protein isoform X1 [Sinocyclocheilus rhinocerous]	_	_
	CI01000026_06167308_06171041	9.6116	2.01577	2.26e-09	1.64e-07		gi|41282113|ref|NP_571670.2| brain-derived neurotrophic factor isoform 2 precursor [Danio rerio]<>gi|821325131|ref|NP_001295578.1| brain-derived neurotrophic factor isoform 2 precursor [Danio rerio]<>gi|688564328|ref|XP_009301509.1| PREDICTED: brain-derived neurotrophic factor isoform X1 [Danio rerio]<>gi|34849504|gb|AAH58301.1| Brain-derived neurotrophic factor [Danio rerio]<>gi|42542440|gb|AAH6…	K04355	_
	CI01180000_06839627_06853120	6.88816	2.3809	2.32e-09	1.67e-07		gi|1020597694|ref|XP_016117423.1| PREDICTED: uncharacterized protein LOC107575583 [Sinocyclocheilus grahami]	_	_
	CI01000177_00095468_00096238	5.03376	3.84018	2.37e-09	1.71e-07		gi|966664534|gb|KTF98558.1| hypothetical protein cypCar_00028802 [Cyprinus carpio]	K13155	_
	CI01000046_00690567_00697727	-5.18341	3.74738	2.43e-09	1.75e-07		gi|966699627|gb|KTG31868.1| hypothetical protein cypCar_00031703 [Cyprinus carpio]	_	_
	CI01000024_02926237_02930534	-4.57812	6.49587	2.47e-09	1.75e-07		gi|1025042294|ref|XP_016327988.1| PREDICTED: pituitary tumor-transforming gene 1 protein-interacting protein-like [Sinocyclocheilus anshuiensis]	_	_
	CI01180000_11469674_11492740	4.66311	5.39797	2.47e-09	1.75e-07		gi|1025138276|ref|XP_016352940.1| PREDICTED: inactive ubiquitin carboxyl-terminal hydrolase 54-like isoform X3 [Sinocyclocheilus anshuiensis]	_	_
	CI01000029_01943164_01970772	9.59568	2.00026	2.48e-09	1.75e-07		gi|1020478834|ref|XP_016144801.1| PREDICTED: calcipressin-2-like isoform X3 [Sinocyclocheilus grahami]	K17903	_
	CI01000030_00945680_00950479	9.59568	2.00026	2.48e-09	1.75e-07		gi|1024980517|ref|XP_016311899.1| PREDICTED: lipoprotein lipase-like isoform X1 [Sinocyclocheilus anshuiensis]	K01059	_
	CI01000054_11162176_11165636	9.59568	2.00026	2.48e-09	1.75e-07		gi|1024927153|ref|XP_016360571.1| PREDICTED: XK-related protein 8-like [Sinocyclocheilus anshuiensis]	_	_
	CI01066589_00000881_00001606	9.59568	2.00026	2.48e-09	1.75e-07		gi|1025170827|ref|XP_016357797.1| PREDICTED: trypsin-3-like [Sinocyclocheilus anshuiensis]	_	_
	CI01000010_02530251_02538713	-4.50814	9.10934	2.48e-09	1.75e-07		gi|35903023|ref|NP_919383.1| MAP kinase interacting serine/threonine kinase 2b [Danio rerio]<>gi|27882487|gb|AAH44375.1| MAP kinase-interacting serine/threonine kinase 2b [Danio rerio]<>gi|182892048|gb|AAI65746.1| Mknk2b protein [Danio rerio]	K04372	biological_process:protein phosphorylation(GO:0006468);molecular_function:ATP binding(GO:0005524);molecular_function:protein serine/threonine kinase activity(GO:0004674)
	CI01000033_00523275_00559791	4.94643	4.09865	2.48e-09	1.75e-07		gi|1025260136|ref|XP_016371642.1| PREDICTED: phospholipid phosphatase 3-like [Sinocyclocheilus rhinocerous]	K01080	cellular_component:membrane(GO:0016020);molecular_function:catalytic activity(GO:0003824)
	CI01000005_05343556_05395924	6.87579	2.36885	2.49e-09	1.75e-07		gi|1025059529|ref|XP_016332646.1| PREDICTED: dystonin isoform X6 [Sinocyclocheilus anshuiensis]	K10382	_
	CI01000006_04989318_04992332	4.72279	5.06504	2.51e-09	1.76e-07		gi|1020491526|ref|XP_016084174.1| PREDICTED: lathosterol oxidase-like [Sinocyclocheilus grahami]	K00227	_
	CI01000330_03561340_03578253	-4.52682	7.61522	2.52e-09	1.77e-07		gi|966652294|gb|KTF87196.1| hypothetical protein cypCar_00025220 [Cyprinus carpio]	K09208	_
	CI01000345_02248442_02289456	-6.67876	2.3942	2.67e-09	1.87e-07		gi|966698831|gb|KTG31072.1| hypothetical protein cypCar_00017557 [Cyprinus carpio]	K08796	_
	CI01000112_00727125_00743789	9.57958	1.98458	2.71e-09	1.89e-07		gi|528482166|ref|XP_697127.4| PREDICTED: caspase recruitment domain-containing protein 14 [Danio rerio]	_	_
	CI01159001_00000010_00001176	-9.56489	2.02504	2.71e-09	1.89e-07		gi|34555652|gb|AAQ74974.1| complement C3 [Ctenopharyngodon idella]	K03990	_
	CI01000129_00868892_00870394	-5.16624	3.73096	2.73e-09	1.9e-07		gi|966642771|gb|KTF77683.1| hypothetical protein cypCar_00040236 [Cyprinus carpio]	K12497	molecular_function:binding(GO:0005488)
	CI01000043_01684344_01686432	6.22409	2.63253	2.75e-09	1.91e-07		gi|1025096971|ref|XP_016344374.1| PREDICTED: uncharacterized protein LOC107690531 [Sinocyclocheilus anshuiensis]	_	_
	CI01000013_08139954_08212837	4.9718	3.90392	2.91e-09	2.01e-07		gi|1025319462|ref|XP_016386314.1| PREDICTED: SLIT-ROBO Rho GTPase-activating protein 1 isoform X1 [Sinocyclocheilus rhinocerous]	K07526	_
	CI01000095_05439467_05440069	5.03163	3.70304	2.98e-09	2.06e-07		gi|1020418937|ref|XP_016128440.1| PREDICTED: rho-related GTP-binding protein RhoG-like [Sinocyclocheilus grahami]	K07863	_
	CI01000030_07842295_07842928	-4.97972	3.99914	3.02e-09	2.08e-07		gi|1020422024|ref|XP_016130077.1| PREDICTED: protein shisa-5-like [Sinocyclocheilus grahami]	_	_
	CI01000304_04263955_04264962	-4.48171	8.30483	3.1e-09	2.13e-07			_	_
	CI01000300_05952579_05954888	-5.01544	3.89934	3.22e-09	2.21e-07		gi|1025145360|ref|XP_016415558.1| PREDICTED: ankyrin repeat domain-containing protein 37-like [Sinocyclocheilus rhinocerous]	_	_
	CI01000049_07477191_07532163	4.70458	4.80402	3.25e-09	2.22e-07		gi|1025274543|ref|XP_016375535.1| PREDICTED: regulator of G-protein signaling 12-like [Sinocyclocheilus rhinocerous]	K16449	_
	CI01000071_01452292_01490229	4.70458	4.80402	3.25e-09	2.22e-07		gi|1020476990|ref|XP_016143806.1| PREDICTED: acetoacetyl-CoA synthetase [Sinocyclocheilus grahami]	K01907	molecular_function:acetoacetate-CoA ligase activity(GO:0030729);molecular_function:ATP binding(GO:0005524);biological_process:fatty acid metabolic process(GO:0006631);cellular_component:cytosol(GO:0005829)
	CI01000006_04645532_04679353	4.84029	4.27308	3.49e-09	2.38e-07		gi|47227743|emb|CAG08906.1| unnamed protein product [Tetraodon nigroviridis]	K06785	_
	CI01000050_03272821_03284544	4.56963	5.58724	3.49e-09	2.38e-07		gi|1025312545|ref|XP_016384422.1| PREDICTED: BTB/POZ domain-containing protein KCTD9 [Sinocyclocheilus rhinocerous]	_	_
	CI01000030_11017331_11024754	4.4556	8.70767	3.51e-09	2.39e-07		gi|1025198737|ref|XP_016425447.1| PREDICTED: megakaryocyte-associated tyrosine-protein kinase-like [Sinocyclocheilus rhinocerous]	K08888	_
	CI01000039_03118693_03132197	-4.65859	5.01658	3.61e-09	2.45e-07		gi|1025343453|ref|XP_016392798.1| PREDICTED: KN motif and ankyrin repeat domain-containing protein 1-like [Sinocyclocheilus rhinocerous]<>gi|1025343457|ref|XP_016392799.1| PREDICTED: KN motif and ankyrin repeat domain-containing protein 1-like [Sinocyclocheilus rhinocerous]<>gi|1025343461|ref|XP_016392800.1| PREDICTED: KN motif and ankyrin repeat domain-containing protein 1-like [Sinocyclocheilus…	_	_
	CI01000080_01490467_01490889	-5.11795	3.68481	3.67e-09	2.48e-07		gi|688557691|ref|XP_009300216.1| PREDICTED: notch-regulated ankyrin repeat-containing protein B isoform X1 [Danio rerio]	_	biological_process:regulation of cell-cell adhesion(GO:0022407);biological_process:regulation of transcription, DNA-templated(GO:0006355);biological_process:blood vessel endothelial cell proliferation involved in sprouting angiogenesis(GO:0002043);biological_process:Notch signaling pathway(GO:0007219);biological_process:patterning of blood vessels(GO:0001569)
	CI01048939_00002837_00004376	4.96407	3.77298	3.67e-09	2.48e-07		gi|966699734|gb|KTG31975.1| hypothetical protein cypCar_00022360 [Cyprinus carpio]	K00511	_
	CI01000306_09500798_09514840	4.59141	5.49074	3.73e-09	2.51e-07		gi|1024921095|ref|XP_016352320.1| PREDICTED: protein bicaudal D homolog 2-like isoform X1 [Sinocyclocheilus anshuiensis]	K18739	_
	CI01000321_03674424_03676748	5.03456	3.55684	3.77e-09	2.53e-07		gi|1025398413|ref|XP_016407232.1| PREDICTED: interleukin-11-like [Sinocyclocheilus rhinocerous]	_	_
	CI01180000_06984285_06989850	4.59477	5.36619	3.79e-09	2.54e-07		gi|1020410362|ref|XP_016123816.1| PREDICTED: apoptosis-inducing factor 2 [Sinocyclocheilus grahami]<>gi|1020410364|ref|XP_016123817.1| PREDICTED: apoptosis-inducing factor 2 [Sinocyclocheilus grahami]	_	_
	CI01000051_05996289_06007664	-4.57177	5.73362	3.85e-09	2.58e-07		gi|1025186507|ref|XP_016422454.1| PREDICTED: ammonium transporter Rh type A-like [Sinocyclocheilus rhinocerous]	K06580	_
	CI01000211_00202294_00214831	-4.42648	10.6867	3.88e-09	2.59e-07		gi|831287446|ref|XP_012675081.1| PREDICTED: arachidonate 15-lipoxygenase B-like [Clupea harengus]	K18684	_
	CI01000068_00655253_00658127	-4.5791	5.51991	3.88e-09	2.59e-07		gi|1025351029|ref|XP_016394851.1| PREDICTED: microtubule-associated protein RP/EB family member 3-like isoform X1 [Sinocyclocheilus rhinocerous]	K10436	_
	CI01000026_08474877_08483134	5.02347	3.54615	4.02e-09	2.68e-07		gi|1024959224|ref|XP_016300604.1| PREDICTED: dipeptidase 2-like isoform X1 [Sinocyclocheilus anshuiensis]	_	_
	CI01000086_00528152_00537757	-4.42142	9.83102	4.04e-09	2.69e-07		gi|1025350868|ref|XP_016394809.1| PREDICTED: nuclear receptor subfamily 1 group D member 2-like [Sinocyclocheilus rhinocerous]	K03728	_
	CI01000340_12532321_12545278	5.81727	2.78462	4.06e-09	2.69e-07		gi|938072131|gb|KPP70246.1| hypothetical protein Z043_110939 [Scleropages formosus]	K05103	_
	CI01000004_00812006_00813189	4.43875	8.24431	4.12e-09	2.72e-07		gi|966699600|gb|KTG31841.1| hypothetical protein cypCar_00024579 [Cyprinus carpio]	K16449	biological_process:termination of G-protein coupled receptor signaling pathway(GO:0038032);biological_process:positive regulation of GTPase activity(GO:0043547);molecular_function:GTPase activator activity(GO:0005096);cellular_component:cytoplasm(GO:0005737);cellular_component:plasma membrane(GO:0005886)
	CI01000055_01879814_01892778	-4.44454	7.88387	4.12e-09	2.72e-07		gi|1024942302|ref|XP_016360311.1| PREDICTED: coiled-coil domain-containing protein 57-like isoform X1 [Sinocyclocheilus anshuiensis]	_	_
	CI01000066_01829752_01832316	4.42948	8.18119	4.29e-09	2.83e-07		gi|1024963947|ref|XP_016303112.1| PREDICTED: V-type proton ATPase subunit E 1-like [Sinocyclocheilus anshuiensis]	K02150	biological_process:ATP hydrolysis coupled proton transport(GO:0015991);cellular_component:proton-transporting two-sector ATPase complex, catalytic domain(GO:0033178);molecular_function:proton-transporting ATPase activity, rotational mechanism(GO:0046961);biological_process:retina development in camera-type eye(GO:0060041)
	CI01000029_08654610_08655443	9.49627	1.90355	4.33e-09	2.84e-07		gi|1020513198|ref|XP_016095786.1| PREDICTED: thyroxine 5-deiodinase-like [Sinocyclocheilus grahami]	K07754	_
	CI01000361_00327051_00330442	-9.49174	1.9557	4.33e-09	2.84e-07		gi|1025166035|ref|XP_016418964.1| PREDICTED: uncharacterized protein LOC107748600 [Sinocyclocheilus rhinocerous]	_	_
	CI01000016_03072793_03080040	4.70523	4.37528	4.34e-09	2.84e-07		gi|587655612|gb|AHK09951.1| coagulation factor VIII [Ctenopharyngodon idella]	_	_
	CI01000325_07762711_07766606	4.50535	5.89641	4.42e-09	2.89e-07		gi|1025377343|ref|XP_016399519.1| PREDICTED: acetyl-CoA acetyltransferase, cytosolic-like [Sinocyclocheilus rhinocerous]	K00626	_
	CI01000071_00329399_00333840	5.59372	2.96295	4.43e-09	2.89e-07		gi|542232309|ref|XP_003449707.2| PREDICTED: ectoderm-neural cortex protein 1 [Oreochromis niloticus]	K10462	_
	CI01000070_04646935_04666885	5.80788	2.77551	4.53e-09	2.95e-07		gi|1025293779|ref|XP_016379300.1| PREDICTED: uncharacterized protein LOC107717148 [Sinocyclocheilus rhinocerous]	_	_
	CI01000335_00650139_00666910	9.47902	1.88679	4.77e-09	3.1e-07			_	_
	CI01000074_00039657_00045016	5.79843	2.76634	4.78e-09	3.1e-07		gi|1024956073|ref|XP_016298918.1| PREDICTED: polymeric immunoglobulin receptor-like [Sinocyclocheilus anshuiensis]	_	_
	CI01000024_02170481_02175158	-4.60285	5.01343	4.84e-09	3.13e-07		gi|1025253368|ref|XP_016369814.1| PREDICTED: nuclear receptor subfamily 4 group A member 2-like [Sinocyclocheilus rhinocerous]	K08558	_
	CI01000034_03869116_03883535	-4.50537	5.83577	5.01e-09	3.24e-07		gi|966699570|gb|KTG31811.1| hypothetical protein cypCar_00015732 [Cyprinus carpio]	K06573	molecular_function:inorganic anion exchanger activity(GO:0005452);biological_process:anion transport(GO:0006820);molecular_function:protein binding(GO:0005515);biological_process:embryonic hemopoiesis(GO:0035162);biological_process:erythrocyte differentiation(GO:0030218);cellular_component:integral component of membrane(GO:0016021)
	CI01000013_04943413_04948991	4.39362	9.2292	5.03e-09	3.24e-07		gi|1025003493|ref|XP_016320765.1| PREDICTED: interleukin-34-like [Sinocyclocheilus anshuiensis]<>gi|1025003495|ref|XP_016320766.1| PREDICTED: interleukin-34-like [Sinocyclocheilus anshuiensis]	_	_
	CI01000004_10290550_10295288	-4.54699	5.41947	5.12e-09	3.3e-07		gi|1025186849|ref|XP_016422556.1| PREDICTED: carbonic anhydrase-like [Sinocyclocheilus rhinocerous]	K18245	_
	CI01000137_00340054_00341951	-9.46141	1.92699	5.26e-09	3.38e-07			_	_
	CI01000338_00553606_00554414	4.93889	3.61369	5.29e-09	3.39e-07		gi|1024928038|ref|XP_016295238.1| PREDICTED: sesquipedalian-1-like [Sinocyclocheilus anshuiensis]<>gi|1024928041|ref|XP_016295247.1| PREDICTED: sesquipedalian-1-like [Sinocyclocheilus anshuiensis]	_	_
	CI01000043_04450220_04453014	5.77933	2.74783	5.34e-09	3.42e-07		gi|18858673|ref|NP_571710.1| fibroblast growth factor 4 precursor [Danio rerio]<>gi|10179934|gb|AAG13950.1| fibroblast growth factor 4 precursor [Danio rerio]<>gi|118763880|gb|AAI28818.1| Fibroblast growth factor 4 [Danio rerio]	K04358	molecular_function:growth factor activity(GO:0008083);biological_process:Kupffer's vesicle development(GO:0070121);biological_process:determination of left/right symmetry(GO:0007368);biological_process:cilium morphogenesis(GO:0060271)
	CI01000000_18779242_18784513	-5.36973	2.96749	5.38e-09	3.44e-07		gi|528499714|ref|XP_005173169.1| PREDICTED: gamma-aminobutyric acid receptor subunit alpha-6 isoform X1 [Danio rerio]	K05175	molecular_function:GABA-A receptor activity(GO:0004890);cellular_component:postsynaptic membrane(GO:0045211);cellular_component:cell junction(GO:0030054);cellular_component:plasma membrane(GO:0005886);molecular_function:extracellular ligand-gated ion channel activity(GO:0005230);biological_process:ion transport(GO:0006811);cellular_component:integral component of membrane(GO:0016021)
	CI01000012_03267719_03279187	-5.1322	3.51232	5.6e-09	3.57e-07		gi|1024932909|ref|XP_016310235.1| PREDICTED: putative thiamine transporter SLC35F3 isoform X1 [Sinocyclocheilus anshuiensis]	K15288	_
	CI01000306_05414347_05434965	-5.36231	2.96045	5.66e-09	3.6e-07		gi|528494496|ref|XP_003199545.2| PREDICTED: chromodomain-helicase-DNA-binding protein 5 isoform X3 [Danio rerio]	K14435	molecular_function:zinc ion binding(GO:0008270);biological_process:regulation of transcription, DNA-templated(GO:0006355);molecular_function:DNA binding(GO:0003677);molecular_function:ATP binding(GO:0005524);molecular_function:hydrolase activity, acting on acid anhydrides, in phosphorus-containing anhydrides(GO:0016818);cellular_component:nucleus(GO:0005634)
	CI01000172_00465313_00503388	-9.446	1.91242	5.8e-09	3.67e-07		gi|1020487365|ref|XP_016149330.1| PREDICTED: RNA binding protein fox-1 homolog 3-like isoform X1 [Sinocyclocheilus grahami]	K14946	_
	CI01000339_06747841_06748719	-9.446	1.91242	5.8e-09	3.67e-07		gi|1020423066|ref|XP_016130644.1| PREDICTED: transmembrane protein 119-like isoform X1 [Sinocyclocheilus grahami]<>gi|1020423068|ref|XP_016130645.1| PREDICTED: transmembrane protein 119-like isoform X1 [Sinocyclocheilus grahami]	_	_
	CI01000113_00013132_00029627	-4.83376	3.98236	5.9e-09	3.73e-07		gi|830260318|ref|NP_001296569.1| ribonucleoprotein PTB-binding 1 isoform 1 [Danio rerio]	_	_
	CI01000040_01627545_01661876	5.23055	2.92135	5.94e-09	3.75e-07		gi|1024971040|ref|XP_016306936.1| PREDICTED: PDZ and LIM domain protein 4-like [Sinocyclocheilus anshuiensis]	_	molecular_function:zinc ion binding(GO:0008270)
	CI01000009_01110684_01111118	-4.57054	5.16701	6e-09	3.78e-07		gi|1024992518|ref|XP_016316434.1| PREDICTED: dachshund homolog 1-like isoform X1 [Sinocyclocheilus anshuiensis]	_	_
	CI01000029_05361419_05364642	-4.59803	4.85321	6.14e-09	3.86e-07		gi|1020466807|ref|XP_016138375.1| PREDICTED: uncharacterized protein LOC107593255 [Sinocyclocheilus grahami]	_	_
	CI01000467_00022076_00049864	4.52562	5.12249	6.17e-09	3.87e-07		gi|1025151722|ref|XP_016416670.1| PREDICTED: anthrax toxin receptor 2-like [Sinocyclocheilus rhinocerous]	K06467	cellular_component:integral component of membrane(GO:0016021);molecular_function:receptor activity(GO:0004872)
	CI01000016_11034620_11091604	4.72089	4.31705	6.21e-09	3.89e-07		gi|1025152527|ref|XP_016416817.1| PREDICTED: growth factor receptor-bound protein 10-like isoform X1 [Sinocyclocheilus rhinocerous]<>gi|1025152533|ref|XP_016416818.1| PREDICTED: growth factor receptor-bound protein 10-like isoform X1 [Sinocyclocheilus rhinocerous]	_	_
	CI01000325_08571807_08594165	-4.70265	4.26353	6.26e-09	3.91e-07		gi|1025132012|ref|XP_016351796.1| PREDICTED: armadillo repeat-containing protein 2-like isoform X1 [Sinocyclocheilus anshuiensis]	_	_
	CI01000080_02896369_02900782	-5.55637	2.75518	6.32e-09	3.94e-07		gi|966711999|gb|KTG44237.1| hypothetical protein cypCar_00020077 [Cyprinus carpio]	K05768	_
	CI01000153_00227118_00245589	4.61981	4.49317	6.39e-09	3.98e-07		gi|966711781|gb|KTG44019.1| hypothetical protein cypCar_00029264, partial [Cyprinus carpio]	K03068	biological_process:regulation of canonical Wnt signaling pathway(GO:0060828)
	CI01000049_00732479_00766646	9.44388	1.85268	6.4e-09	3.98e-07		gi|1024952003|ref|XP_016296751.1| PREDICTED: cholecystokinin receptor-like [Sinocyclocheilus anshuiensis]	K04194	_
	CI01000052_01782593_01798674	-4.69664	4.25782	6.52e-09	4.04e-07		gi|1040121852|gb|OBS65321.1| hypothetical protein A6R68_06144 [Neotoma lepida]	K04630	_
	CI01000030_07804997_07807303	4.9066	3.58264	6.59e-09	4.08e-07		gi|1024947529|ref|XP_016362849.1| PREDICTED: cytochrome b561 domain-containing protein 2 [Sinocyclocheilus anshuiensis]	K08371	_
	CI01000012_12653960_12664480	6.07107	2.48395	6.62e-09	4.09e-07		gi|465972061|gb|EMP32921.1| Neutral amino acid transporter A [Chelonia mydas]	K05615	_
	CI01000006_11659293_11664444	-4.37964	7.49757	6.64e-09	4.09e-07		gi|966646918|gb|KTF81828.1| hypothetical protein cypCar_00029868 [Cyprinus carpio]	K04266	_
	CI01000039_07962128_07963720	4.94334	3.46901	6.64e-09	4.09e-07		gi|1020474289|ref|XP_016142374.1| PREDICTED: ependymin [Sinocyclocheilus grahami]	_	cellular_component:extracellular region(GO:0005576);molecular_function:calcium ion binding(GO:0005509);biological_process:cell-matrix adhesion(GO:0007160)
	CI01000027_02429134_02451902	5.12053	3.06961	6.67e-09	4.1e-07		gi|1024922878|ref|XP_016338969.1| PREDICTED: regulating synaptic membrane exocytosis protein 2 isoform X16 [Sinocyclocheilus anshuiensis]	K15297	molecular_function:metal ion binding(GO:0046872);biological_process:intracellular protein transport(GO:0006886);molecular_function:Rab GTPase binding(GO:0017137)
	CI01000218_00048845_00054766	-4.45612	5.81466	6.71e-09	4.12e-07		gi|966646634|gb|KTF81546.1| hypothetical protein cypCar_00042925, partial [Cyprinus carpio]	_	_
	CI01000027_09068632_09069609	4.36283	7.77875	6.85e-09	4.19e-07		gi|528504300|ref|XP_005158243.1| PREDICTED: uncharacterized protein LOC101883708 [Danio rerio]	_	_
	CI01000004_05920907_05931169	-4.37448	7.41481	6.87e-09	4.2e-07		gi|966708762|gb|KTG41000.1| hypothetical protein cypCar_00019303 [Cyprinus carpio]	K08524	_
	CI01105196_00000321_00004921	9.42599	1.83532	7.08e-09	4.31e-07		gi|1020462561|ref|XP_016136111.1| PREDICTED: dehydrogenase/reductase SDR family member 11-like [Sinocyclocheilus grahami]	_	biological_process:metabolic process(GO:0008152);molecular_function:oxidoreductase activity(GO:0016491);molecular_function:nucleotide binding(GO:0000166)
	CI01023036_00001462_00004069	-9.41468	1.88282	7.08e-09	4.31e-07		gi|966701366|gb|KTG33607.1| hypothetical protein cypCar_00032899 [Cyprinus carpio]	_	_
	CI01000010_12110651_12120420	-4.93687	3.67681	7.58e-09	4.61e-07		gi|1025201900|ref|XP_016426302.1| PREDICTED: tissue-type plasminogen activator-like [Sinocyclocheilus rhinocerous]	K01343	molecular_function:serine-type endopeptidase activity(GO:0004252);biological_process:proteolysis(GO:0006508)
	CI01140463_00000716_00001178	-5.30933	2.91021	7.63e-09	4.63e-07		gi|335987431|gb|AEH76783.1| immunoglobulin HY heavy chain [Ctenopharyngodon idella]	_	_
	CI01000037_03946645_03954021	-4.333	8.45925	7.77e-09	4.71e-07		gi|1025315369|ref|XP_016385201.1| PREDICTED: serine/threonine-protein kinase SIK2-like [Sinocyclocheilus rhinocerous]	K19008	_
	CI01068778_00000313_00002986	-4.87414	3.76467	7.87e-09	4.76e-07		gi|1025230065|ref|XP_016432035.1| PREDICTED: receptor-type tyrosine-protein phosphatase eta-like [Sinocyclocheilus rhinocerous]	_	_
	CI01000302_00156771_00157341	4.32286	8.929	7.95e-09	4.8e-07		gi|966707899|gb|KTG40139.1| hypothetical protein cypCar_00019745 [Cyprinus carpio]	_	_
	CI01000311_01659809_01695288	-4.71867	4.09012	7.98e-09	4.81e-07		gi|1025356215|ref|XP_016389998.1| PREDICTED: apoptosis-stimulating of p53 protein 1-like isoform X5 [Sinocyclocheilus rhinocerous]<>gi|1025356218|ref|XP_016390006.1| PREDICTED: apoptosis-stimulating of p53 protein 1-like isoform X6 [Sinocyclocheilus rhinocerous]	K17554	_
	CI01000344_00598734_00637342	-6.49103	2.21618	8.34e-09	5.01e-07		gi|1025374171|ref|XP_016398659.1| PREDICTED: regulator of G-protein signaling 12-like [Sinocyclocheilus rhinocerous]	K16449	_
	CI01000070_02659015_02664679	4.35509	6.71766	8.52e-09	5.11e-07		gi|1024939677|ref|XP_016335036.1| PREDICTED: isopentenyl-diphosphate Delta-isomerase 1-like [Sinocyclocheilus anshuiensis]	K01823	_
	CI01000020_00668211_00680679	9.38951	1.79996	8.67e-09	5.19e-07		gi|1025334933|ref|XP_016390535.1| PREDICTED: chloride anion exchanger-like [Sinocyclocheilus rhinocerous]<>gi|1025334937|ref|XP_016390536.1| PREDICTED: chloride anion exchanger-like [Sinocyclocheilus rhinocerous]	K14078	cellular_component:integral component of membrane(GO:0016021);molecular_function:secondary active sulfate transmembrane transporter activity(GO:0008271);biological_process:sulfate transport(GO:0008272);biological_process:transmembrane transport(GO:0055085)
	CI01000306_11480178_11484239	-5.15667	3.32182	8.7e-09	5.2e-07		gi|1024952388|ref|XP_016296954.1| PREDICTED: ERBB receptor feedback inhibitor 1-like [Sinocyclocheilus anshuiensis]	_	_
	CI01000049_07212725_07215168	4.45781	5.30044	8.83e-09	5.27e-07		gi|1020511996|ref|XP_016095138.1| PREDICTED: ras-related protein Rab-33B-like isoform X1 [Sinocyclocheilus grahami]	_	_
	CI01000047_05862382_05868129	4.94226	3.30189	9.04e-09	5.38e-07		gi|1025249886|ref|XP_016368888.1| PREDICTED: uncharacterized protein LOC107709005 [Sinocyclocheilus rhinocerous]	_	_
	CI01000012_05565127_05567009	-4.48754	5.172	9.15e-09	5.44e-07		gi|1020503892|ref|XP_016090828.1| PREDICTED: programmed cell death 1 ligand 1-like [Sinocyclocheilus grahami]	_	_
	CI01000304_08165245_08217042	-5.14509	3.31081	9.39e-09	5.57e-07		gi|1025367098|ref|XP_016396755.1| PREDICTED: probable flavin-containing monoamine oxidase A [Sinocyclocheilus rhinocerous]	K00274	_
	CI01000340_18138369_18161399	4.50916	4.90437	9.48e-09	5.61e-07		gi|1025061001|ref|XP_016333061.1| PREDICTED: alpha-1-syntrophin-like [Sinocyclocheilus anshuiensis]	_	_
	CI01000082_00167971_00175044	-4.30931	7.92599	9.48e-09	5.61e-07		gi|1025071897|ref|XP_016337511.1| PREDICTED: ski-like protein [Sinocyclocheilus anshuiensis]	_	molecular_function:binding(GO:0005488)
	CI01000000_13926605_13928231	-4.28189	10.839	9.69e-09	5.72e-07		gi|315620158|gb|ADU52987.1| leukocyte cell-derived chemotaxin 2 [Ctenopharyngodon idella]	_	_
	CI01000206_00029745_00051502	6.64742	2.14706	9.8e-09	5.78e-07		gi|1025135309|ref|XP_016410633.1| PREDICTED: inactive dipeptidyl peptidase 10-like isoform X1 [Sinocyclocheilus rhinocerous]	_	_
	CI01000189_00797964_00824109	-5.82059	2.46674	9.89e-09	5.82e-07		gi|1020461094|ref|XP_016135324.1| PREDICTED: mitochondrial peptide methionine sulfoxide reductase-like isoform X2 [Sinocyclocheilus grahami]	K07304	_
	CI01180000_07491283_07505536	5.05714	3.00868	1.01e-08	5.91e-07		gi|123889730|sp|Q1RLY6.1|KMO_DANRE RecName: Full=Kynurenine 3-monooxygenase; AltName: Full=Kynurenine 3-hydroxylase<>gi|92096447|gb|AAI15228.1| Kynurenine 3-monooxygenase [Danio rerio]	K00486	biological_process:pyridine nucleotide biosynthetic process(GO:0019363);biological_process:oxidation-reduction process(GO:0055114);cellular_component:integral component of membrane(GO:0016021);cellular_component:mitochondrial outer membrane(GO:0005741);biological_process:NAD metabolic process(GO:0019674);molecular_function:kynurenine 3-monooxygenase activity(GO:0004502)
	CI01000049_07723874_07725512	-4.35929	6.19788	1.06e-08	6.18e-07		gi|335987415|gb|AEH76775.1| C-type lectin 1 [Ctenopharyngodon idella]	_	_
	CI01000333_00353408_00362911	-5.81003	2.45676	1.06e-08	6.18e-07		gi|1024971264|ref|XP_016307055.1| PREDICTED: tetraspanin-1-like [Sinocyclocheilus anshuiensis]	_	cellular_component:membrane(GO:0016020)
	CI01000403_00124430_00128235	-5.81003	2.45676	1.06e-08	6.18e-07		gi|1025119182|ref|XP_016349628.1| PREDICTED: uncharacterized protein LOC107694444 [Sinocyclocheilus anshuiensis]	_	_
	CI01000312_00518402_00527302	9.3521	1.76373	1.07e-08	6.21e-07		gi|1025293359|ref|XP_016379185.1| PREDICTED: shootin-1-like [Sinocyclocheilus rhinocerous]	_	_
	CI01158966_00000781_00001642	-9.33328	1.80602	1.07e-08	6.21e-07		gi|1025263919|ref|XP_016372666.1| PREDICTED: complement C3-like, partial [Sinocyclocheilus rhinocerous]	_	_
	CI01000010_01766564_01771836	-4.46874	4.88584	1.12e-08	6.52e-07		gi|157389012|ref|NP_840082.2| selenoprotein Pa precursor [Danio rerio]	_	molecular_function:selenium binding(GO:0008430);cellular_component:extracellular region(GO:0005576)
	CI01000319_01466666_01489124	4.66544	4.01875	1.15e-08	6.68e-07		gi|1025188069|ref|XP_016422897.1| PREDICTED: DENN domain-containing protein 3-like [Sinocyclocheilus rhinocerous]	_	_
	CI01094892_00000380_00000955	4.66544	4.01875	1.15e-08	6.68e-07		gi|1020591314|ref|XP_016116202.1| PREDICTED: B-cell receptor CD22-like [Sinocyclocheilus grahami]	_	_
	CI01000019_01238694_01247650	4.43117	4.9143	1.17e-08	6.75e-07		gi|95147670|ref|NP_001035583.1| methionine aminopeptidase 2 [Bos taurus]<>gi|110278814|sp|Q3ZC89.1|MAP2_BOVIN RecName: Full=Methionine aminopeptidase 2; Short=MAP 2; Short=MetAP 2; AltName: Full=Initiation factor 2-associated 67 kDa glycoprotein; Short=p67; Short=p67eIF2; AltName: Full=Peptidase M<>gi|73586904|gb|AAI02825.1| Methionyl aminopeptidase 2 [Bos taurus]	K01265	cellular_component:cytoplasm(GO:0005737);molecular_function:metal ion binding(GO:0046872);biological_process:N-terminal protein amino acid modification(GO:0031365);molecular_function:metalloexopeptidase activity(GO:0008235);biological_process:protein processing(GO:0016485);molecular_function:aminopeptidase activity(GO:0004177);biological_process:peptidyl-methionine modification(GO:0018206);biolog…
	CI01000015_06127820_06146715	-4.27469	7.96133	1.17e-08	6.77e-07		gi|1025309169|ref|XP_016383523.1| PREDICTED: max-interacting protein 1 isoform X1 [Sinocyclocheilus rhinocerous]	K09114	_
	CI01000071_00335696_00339048	9.33302	1.74527	1.19e-08	6.83e-07			_	_
	CI01000029_09371783_09394715	-5.44954	2.65406	1.2e-08	6.89e-07		gi|1020530298|ref|XP_016104867.1| PREDICTED: 1-phosphatidylinositol 4,5-bisphosphate phosphodiesterase beta-4-like isoform X2 [Sinocyclocheilus grahami]	K05858	_
	CI01062162_00000443_00007828	-4.32186	6.38371	1.25e-08	7.14e-07		gi|1025171690|ref|XP_016419996.1| PREDICTED: supervillin-like isoform X3 [Sinocyclocheilus rhinocerous]	K10369	_
	CI01000012_03280454_03281289	-6.42698	2.15568	1.26e-08	7.2e-07			_	_
	CI01000026_00898521_00902621	4.2316	11.0063	1.33e-08	7.58e-07		gi|1025199621|ref|XP_016425688.1| PREDICTED: thioredoxin-like [Sinocyclocheilus rhinocerous]	K03671	_
	CI01000353_01727960_01729027	6.60307	2.10415	1.37e-08	7.79e-07		gi|1025193803|ref|XP_016424108.1| PREDICTED: G-protein coupled receptor 1-like isoform X1 [Sinocyclocheilus rhinocerous]	K04310	_
	CI01000329_00157119_00159586	-6.41382	2.14327	1.37e-08	7.79e-07			_	_
	CI01000306_02807061_02829421	4.39504	4.92028	1.43e-08	8.14e-07		gi|1025345438|ref|XP_016393335.1| PREDICTED: rho GTPase-activating protein 39-like [Sinocyclocheilus rhinocerous]	_	_
	CI01000115_01269163_01291151	-4.36681	5.50894	1.45e-08	8.22e-07		gi|41053307|ref|NP_956336.1| metallophosphoesterase domain containing 2b [Danio rerio]<>gi|528521258|ref|XP_005174365.1| PREDICTED: metallophosphoesterase domain containing 2b isoform X1 [Danio rerio]<>gi|29179485|gb|AAH49341.1| Metallophosphoesterase domain containing 2 [Danio rerio]<>gi|49183034|gb|AAT57876.1| fetal brain protein 239 [Danio rerio]<>gi|157423285|gb|AAI53489.1| Mpped2 protein [Da…	_	molecular_function:hydrolase activity(GO:0016787)
	CI01000024_03003928_03015038	4.99085	2.94507	1.47e-08	8.35e-07		gi|1025042274|ref|XP_016327982.1| PREDICTED: carboxylesterase notum2-like [Sinocyclocheilus anshuiensis]	_	_
	CI01000049_04296486_04310931	4.25754	7.03092	1.51e-08	8.56e-07		gi|21264049|sp|Q9I8V2.1|SMAD1_DANRE RecName: Full=Mothers against decapentaplegic homolog 1; Short=MAD homolog 1; Short=Mothers against DPP homolog 1; AltName: Full=SMAD family member 1; Short=SMAD 1; Short=Smad1<>gi|9049514|gb|AAF82402.1|AF174434_1 mad-related protein Smad1 [Danio rerio]	K04676	biological_process:embryonic pattern specification(GO:0009880);molecular_function:metal ion binding(GO:0046872);cellular_component:transcription factor complex(GO:0005667);biological_process:BMP signaling pathway(GO:0030509);molecular_function:DNA binding(GO:0003677);molecular_function:sequence-specific DNA binding transcription factor activity(GO:0003700);biological_process:transforming growth f…
	CI01000158_01602975_01638158	-4.24316	7.09322	1.6e-08	9.01e-07		gi|1025408382|ref|XP_016409916.1| PREDICTED: multiple C2 and transmembrane domain-containing protein 1-like isoform X1 [Sinocyclocheilus rhinocerous]	_	_
	CI01000046_06399300_06413564	-4.53248	4.18778	1.6e-08	9.03e-07		gi|1020486502|ref|XP_016148871.1| PREDICTED: rab11 family-interacting protein 4A [Sinocyclocheilus grahami]	K12485	_
	CI01000012_09082056_09083285	5.92561	2.34324	1.61e-08	9.09e-07		gi|597771638|ref|XP_007249592.1| PREDICTED: protein DEPP [Astyanax mexicanus]	_	_
	CI01000054_07385840_07388475	4.28183	6.20739	1.64e-08	9.19e-07		gi|374463495|gb|AEZ53130.1| fatty acid-binding protein [Onychostoma macrolepis]	K08756	biological_process:transport(GO:0006810);molecular_function:lipid binding(GO:0008289);molecular_function:transporter activity(GO:0005215)
	CI01000315_00279909_00284043	9.27422	1.68845	1.64e-08	9.19e-07		gi|1024978041|ref|XP_016310570.1| PREDICTED: protein ZNF365-like isoform X1 [Sinocyclocheilus anshuiensis]	K16737	_
	CI01000062_00576651_00595216	-4.50664	4.2442	1.65e-08	9.25e-07		gi|1024973416|ref|XP_016308215.1| PREDICTED: spectrin beta chain, erythrocytic-like isoform X1 [Sinocyclocheilus anshuiensis]	K06115	_
	CI01000340_07543307_07544545	-5.04893	3.21952	1.7e-08	9.51e-07		gi|830260109|ref|NP_571154.2| transcription factor HES-1 [Danio rerio]<>gi|37590864|gb|AAH59551.1| Her6 protein [Danio rerio]	K06054	biological_process:somite specification(GO:0001757);biological_process:regulation of neuron differentiation(GO:0045664);biological_process:regulation of transcription, DNA-templated(GO:0006355);biological_process:thalamus development(GO:0021794);biological_process:Notch signaling pathway(GO:0007219);molecular_function:DNA binding(GO:0003677);molecular_function:protein dimerization activity(GO:004…
	CI01000043_04746456_04753978	4.35624	4.99819	1.77e-08	9.89e-07		gi|597782291|ref|XP_007254692.1| PREDICTED: 7-dehydrocholesterol reductase [Astyanax mexicanus]	K00213	_
	CI01000026_10421310_10440151	4.78157	3.31384	1.82e-08	1.01e-06		gi|1025136808|ref|XP_016352679.1| PREDICTED: multidrug resistance-associated protein 9-like [Sinocyclocheilus anshuiensis]<>gi|1025136814|ref|XP_016352680.1| PREDICTED: multidrug resistance-associated protein 9-like [Sinocyclocheilus anshuiensis]	K05672	_
	CI01000189_03687102_03695400	9.25407	1.669	1.83e-08	1.02e-06		gi|1024975000|ref|XP_016308959.1| PREDICTED: transmembrane protein 26-like [Sinocyclocheilus anshuiensis]	_	_
	CI01000028_00443151_00444100	4.95652	2.91218	1.88e-08	1.05e-06		gi|966640039|gb|KTF74953.1| hypothetical protein cypCar_00035071 [Cyprinus carpio]	_	_
	CI01000026_13356327_13411385	-5.36388	2.57324	1.96e-08	1.09e-06		gi|1024968479|ref|XP_016305544.1| PREDICTED: A disintegrin and metalloproteinase with thrombospondin motifs 18-like [Sinocyclocheilus anshuiensis]	K08632	_
	CI01000062_04021845_04022218	4.94781	2.90385	1.98e-08	1.09e-06		gi|1020470872|ref|XP_016140545.1| PREDICTED: protein eva-1 homolog A [Sinocyclocheilus grahami]	_	_
	CI01000012_07556881_07563284	-4.16935	10.0718	1.98e-08	1.09e-06		gi|966712994|gb|KTG45232.1| hypothetical protein cypCar_00014964 [Cyprinus carpio]	K01476	_
	CI01000006_06061727_06090026	5.35062	2.7281	1.99e-08	1.1e-06		gi|1025302598|ref|XP_016381704.1| PREDICTED: rho GTPase-activating protein 42-like isoform X3 [Sinocyclocheilus rhinocerous]	_	_
	CI01000325_05991862_05992674	4.3219	5.29327	2.02e-08	1.11e-06		gi|1020526536|ref|XP_016102861.1| PREDICTED: uncharacterized protein LOC107562690 [Sinocyclocheilus grahami]	_	_
	CI01000069_02652051_02660623	9.23364	1.6493	2.04e-08	1.12e-06		gi|125812587|ref|XP_697258.2| PREDICTED: protein kinase C and casein kinase substrate in neurons protein 3 [Danio rerio]	_	_
	CI01000009_01183737_01206031	-4.34665	4.91049	2.05e-08	1.13e-06		gi|928058518|ref|XP_013878659.1| PREDICTED: dachshund homolog 1-like isoform X1 [Austrofundulus limnaeus]	_	_
	CI01000340_08808101_08822062	-4.4869	4.37479	2.11e-08	1.16e-06		gi|966659191|gb|KTF94045.1| hypothetical protein cypCar_00032263 [Cyprinus carpio]	K08539	biological_process:steroid hormone mediated signaling pathway(GO:0043401);molecular_function:calcitriol receptor activity(GO:0008434);molecular_function:zinc ion binding(GO:0008270);biological_process:regulation of transcription, DNA-templated(GO:0006355);molecular_function:sequence-specific DNA binding(GO:0043565);molecular_function:steroid hormone receptor activity(GO:0003707);cellular_componen…
	CI01000049_09483465_09491174	-4.16243	9.18677	2.16e-08	1.18e-06		gi|1025091726|ref|XP_016342956.1| PREDICTED: spermine oxidase-like [Sinocyclocheilus anshuiensis]	K12259	_
	CI01000006_02164837_02173343	-4.35413	4.82556	2.17e-08	1.19e-06		gi|836469816|ref|NP_001296774.1| cyclin-J-like protein [Danio rerio]	_	_
	CI01000027_05037013_05040668	9.21292	1.62932	2.29e-08	1.24e-06		gi|1025324351|ref|XP_016387630.1| PREDICTED: LOW QUALITY PROTEIN: oxidative stress-induced growth inhibitor 2-like [Sinocyclocheilus rhinocerous]	_	_
	CI01000006_02448953_02467739	4.18296	6.96858	2.29e-08	1.24e-06		gi|1024924662|ref|XP_016348652.1| PREDICTED: SH2 domain-containing protein 4A-like isoform X1 [Sinocyclocheilus anshuiensis]<>gi|1024924664|ref|XP_016348659.1| PREDICTED: SH2 domain-containing protein 4A-like isoform X1 [Sinocyclocheilus anshuiensis]<>gi|1024924666|ref|XP_016348666.1| PREDICTED: SH2 domain-containing protein 4A-like isoform X1 [Sinocyclocheilus anshuiensis]<>gi|1024924668|ref|XP_…	K17577	_
	CI01000105_01491470_01504942	4.42292	4.24163	2.29e-08	1.24e-06		gi|1020485236|ref|XP_016148202.1| PREDICTED: ankyrin repeat and death domain-containing protein 1A isoform X2 [Sinocyclocheilus grahami]	_	_
	CI01000112_02565726_02573879	-4.14448	11.0706	2.29e-08	1.24e-06		gi|315585128|gb|ADU34086.1| tissue inhibitor of metalloproteinase 2 [Ctenopharyngodon idella]	_	_
	CI01000092_05043766_05046720	6.51008	2.01434	2.3e-08	1.24e-06		gi|966642244|gb|KTF77156.1| hypothetical protein cypCar_00032462 [Cyprinus carpio]	_	_
	CI01000055_03392185_03445744	-4.1965	6.83183	2.3e-08	1.24e-06		gi|1025094231|ref|XP_016343643.1| PREDICTED: actin-binding LIM protein 1-like isoform X18 [Sinocyclocheilus anshuiensis]	K07520	_
	CI01000027_01134221_01143363	4.20264	6.40732	2.33e-08	1.26e-06		gi|1025339719|ref|XP_016391799.1| PREDICTED: uncharacterized protein LOC107726651 [Sinocyclocheilus rhinocerous]	_	_
	CI01000054_08228712_08238666	4.18902	6.71832	2.33e-08	1.26e-06		gi|57768874|ref|NP_001003606.1| uncharacterized protein LOC445212 [Danio rerio]<>gi|528510147|ref|XP_005159673.1| PREDICTED: uncharacterized protein LOC445212 isoform X2 [Danio rerio]<>gi|50418521|gb|AAH78262.1| Family with sequence similarity 49, member A [Danio rerio]	_	_
	CI01000300_07689056_07718164	-4.54626	3.92672	2.34e-08	1.26e-06		gi|47551321|ref|NP_999975.1| carboxypeptidase E precursor [Danio rerio]<>gi|1040654241|ref|XP_017209096.1| PREDICTED: carboxypeptidase E isoform X1 [Danio rerio]<>gi|47123275|gb|AAH70026.1| Zgc:85981 [Danio rerio]	K01294	biological_process:proteolysis(GO:0006508);molecular_function:metallocarboxypeptidase activity(GO:0004181);molecular_function:zinc ion binding(GO:0008270)
	CI01000304_07464639_07466430	-4.99188	3.16549	2.37e-08	1.27e-06		gi|1025123310|ref|XP_016413176.1| PREDICTED: protein phosphatase 1 regulatory subunit 3C-B-like isoform X1 [Sinocyclocheilus rhinocerous]	_	_
	CI01000051_03658445_03675223	-4.74431	3.49421	2.46e-08	1.32e-06		gi|966708857|gb|KTG41095.1| hypothetical protein cypCar_00002545 [Cyprinus carpio]	_	_
	CI01000319_03328863_03353336	4.18937	6.66775	2.47e-08	1.32e-06		gi|966698081|gb|KTG30373.1| hypothetical protein cypCar_00009145 [Cyprinus carpio]	K16806	_
	CI01000174_00646247_00646453	-4.9854	3.15936	2.47e-08	1.32e-06			_	_
	CI01000092_00964013_00967452	-5.66524	2.32022	2.51e-08	1.34e-06		gi|1025122157|ref|XP_016412963.1| PREDICTED: mastermind-like protein 2 isoform X1 [Sinocyclocheilus rhinocerous]<>gi|1025122162|ref|XP_016412964.1| PREDICTED: mastermind-like protein 2 isoform X1 [Sinocyclocheilus rhinocerous]	_	_
	CI01000051_01965924_01969562	6.49398	1.99881	2.51e-08	1.34e-06		gi|1025285562|ref|XP_016378513.1| PREDICTED: barttin-like [Sinocyclocheilus rhinocerous]	K19331	_
	CI01000307_00030238_00031458	5.51652	2.49396	2.53e-08	1.35e-06		gi|966702536|gb|KTG34777.1| hypothetical protein cypCar_00025032 [Cyprinus carpio]	K05840	_
	CI01000030_04219745_04223677	-9.19264	1.67385	2.56e-08	1.36e-06		gi|1020467067|ref|XP_016138517.1| PREDICTED: outer dense fiber protein 3-like [Sinocyclocheilus grahami]	_	biological_process:spermatid development(GO:0007286)
	CI01000027_02950348_02954214	4.35834	4.62399	2.6e-08	1.38e-06		gi|597801635|ref|XP_007242168.1| PREDICTED: squalene monooxygenase [Astyanax mexicanus]	K00511	molecular_function:flavin adenine dinucleotide binding(GO:0050660);molecular_function:3-hydroxyacyl-CoA dehydrogenase activity(GO:0003857);molecular_function:squalene monooxygenase activity(GO:0004506);biological_process:fatty acid metabolic process(GO:0006631);cellular_component:integral component of membrane(GO:0016021);biological_process:oxidation-reduction process(GO:0055114)
	CI01000304_06844730_06857162	4.82295	3.00004	2.7e-08	1.43e-06		gi|1025270147|ref|XP_016374350.1| PREDICTED: phospholipid-transporting ATPase ID-like [Sinocyclocheilus rhinocerous]	K01530	_
	CI01000315_00227422_00233554	4.49685	4.02557	2.73e-08	1.44e-06		gi|1025290544|ref|XP_016382409.1| PREDICTED: signal peptide, CUB and EGF-like domain-containing protein 2 isoform X1 [Sinocyclocheilus rhinocerous]	_	_
	CI01000251_00329454_00398328	4.5211	3.88085	2.8e-08	1.48e-06		gi|1020430565|ref|XP_016131993.1| PREDICTED: interferon-induced very large GTPase 1-like [Sinocyclocheilus grahami]	_	_
	CI01000010_02719044_02722011	-5.30382	2.51672	2.89e-08	1.52e-06			_	_
	CI01000018_06045598_06051674	-5.30382	2.51672	2.89e-08	1.52e-06		gi|1025316532|ref|XP_016385522.1| PREDICTED: lipase member H-like [Sinocyclocheilus rhinocerous]	K19404	_
	CI01000012_12173747_12212480	5.83345	2.25439	2.92e-08	1.53e-06		gi|1024983219|ref|XP_016313346.1| PREDICTED: vinculin isoform X2 [Sinocyclocheilus anshuiensis]	K05700	_
	CI01000020_02164441_02174201	-5.64161	2.29801	2.92e-08	1.53e-06		gi|1025334889|ref|XP_016390523.1| PREDICTED: LOW QUALITY PROTEIN: plakophilin-2-like [Sinocyclocheilus rhinocerous]	K12642	_
	CI01000300_10082094_10086801	4.57008	3.6323	3.01e-08	1.58e-06		gi|1024925184|ref|XP_016351464.1| PREDICTED: transmembrane protein 154-like isoform X2 [Sinocyclocheilus anshuiensis]	_	_
	CI01043947_00002189_00002482	-5.29356	2.50708	3.08e-08	1.61e-06			_	_
	CI01000049_01312448_01313521	-4.10895	8.44062	3.14e-08	1.64e-06		gi|1025306186|ref|XP_016382701.1| PREDICTED: G-protein coupled receptor 183-B-like [Sinocyclocheilus rhinocerous]	_	_
	CI01000192_00315657_00323729	-4.3117	4.68723	3.19e-08	1.66e-06		gi|117606299|ref|NP_001071084.1| serine/threonine kinase 35 [Danio rerio]<>gi|116487578|gb|AAI25864.1| Serine/threonine kinase 35 [Danio rerio]<>gi|182888998|gb|AAI64504.1| Stk35 protein [Danio rerio]	K08859	biological_process:protein phosphorylation(GO:0006468);molecular_function:ATP binding(GO:0005524);molecular_function:protein serine/threonine kinase activity(GO:0004674)
	CI01000327_00230933_00241220	4.73643	3.10485	3.2e-08	1.66e-06		gi|1020425132|ref|XP_016131491.1| PREDICTED: annexin A13-like [Sinocyclocheilus grahami]	K17099	molecular_function:calcium ion binding(GO:0005509);molecular_function:calcium-dependent phospholipid binding(GO:0005544)
	CI01000053_03120615_03122486	-4.55765	3.72067	3.23e-08	1.68e-06		gi|966681087|gb|KTG14248.1| hypothetical protein cypCar_00010768 [Cyprinus carpio]	_	_
	CI01000028_01770721_01773265	-4.14175	6.76938	3.27e-08	1.69e-06		gi|1024998585|ref|XP_016318725.1| PREDICTED: C5a anaphylatoxin chemotactic receptor 1-like [Sinocyclocheilus anshuiensis]	K04010	_
	CI01000012_06380300_06388370	-6.26054	1.99911	3.3e-08	1.71e-06		gi|1025399650|ref|XP_016407565.1| PREDICTED: isthmin-1 isoform X1 [Sinocyclocheilus rhinocerous]	_	cellular_component:extracellular region(GO:0005576);biological_process:angiogenesis(GO:0001525)
	CI01000158_00781706_00786082	4.85767	2.81771	3.3e-08	1.71e-06		gi|966698934|gb|KTG31175.1| hypothetical protein cypCar_00018616, partial [Cyprinus carpio]	K04490	_
	CI01000195_01137307_01158283	4.34368	4.34907	3.33e-08	1.72e-06		gi|966653864|gb|KTF88718.1| hypothetical protein cypCar_00017046 [Cyprinus carpio]	K01794	_
	CI01000027_06335278_06348176	-4.3889	4.13302	3.38e-08	1.74e-06		gi|1025224672|ref|XP_016365535.1| PREDICTED: trichohyalin-like [Sinocyclocheilus rhinocerous]	_	cellular_component:extrinsic component of plasma membrane(GO:0019897);biological_process:embryonic hemopoiesis(GO:0035162);biological_process:erythrocyte differentiation(GO:0030218);molecular_function:calmodulin binding(GO:0005516)
	CI01000333_00090098_00102025	4.6037	3.42754	3.48e-08	1.79e-06		gi|1020487247|ref|XP_016149269.1| PREDICTED: ecto-ADP-ribosyltransferase 4-like [Sinocyclocheilus grahami]	_	_
	CI01000004_03324524_03348961	-4.12242	7.01519	3.49e-08	1.79e-06		gi|1020446128|ref|XP_016132631.1| PREDICTED: coiled-coil domain-containing protein 18 isoform X2 [Sinocyclocheilus grahami]	_	_
	CI01000340_16001904_16003536	-4.68115	3.43458	3.6e-08	1.85e-06		gi|1025326294|ref|XP_016388145.1| PREDICTED: protein FAM212A-like [Sinocyclocheilus rhinocerous]<>gi|1025326300|ref|XP_016388146.1| PREDICTED: protein FAM212A-like [Sinocyclocheilus rhinocerous]	_	_
	CI01000095_04150824_04163142	6.42773	1.93502	3.62e-08	1.85e-06		gi|966655044|gb|KTF89898.1| hypothetical protein cypCar_00029407 [Cyprinus carpio]	K08117	_
	CI01000163_00033781_00040009	-9.13616	1.62095	3.63e-08	1.86e-06		gi|1040668485|ref|XP_017207360.1| PREDICTED: uncharacterized protein wu:fc27b11 [Danio rerio]	_	_
	CI01000339_07306865_07312762	-4.34914	4.4429	3.64e-08	1.86e-06		gi|966714601|gb|KTG46839.1| hypothetical protein cypCar_00001309 [Cyprinus carpio]	_	_
	CI01000300_06674794_06711484	5.79207	2.21458	3.67e-08	1.87e-06		gi|1040654453|ref|XP_017210587.1| PREDICTED: LIM and calponin homology domains-containing protein 1 isoform X3 [Danio rerio]	_	_
	CI01000046_00702360_00703954	-4.07833	9.03419	3.68e-08	1.87e-06		gi|1025250469|ref|XP_016369036.1| PREDICTED: cell adhesion molecule 4-like isoform X2 [Sinocyclocheilus rhinocerous]	_	_
	CI01000090_00397826_00398584	-4.0663	9.78912	3.78e-08	1.92e-06		gi|966700127|gb|KTG32368.1| hypothetical protein cypCar_00040991 [Cyprinus carpio]	K08270	_
	CI01000027_07981813_07992141	4.12408	6.33298	3.79e-08	1.92e-06		gi|966645894|gb|KTF80806.1| hypothetical protein cypCar_00030505 [Cyprinus carpio]	K01368	_
	CI01000006_06142449_06142925	4.57905	3.40406	4e-08	2.03e-06		gi|31580626|gb|AAP49829.1| interferon-inducible protein Gig2 [Carassius auratus]<>gi|242134020|gb|ACS87977.1| interferon inducible protein [Carassius auratus]<>gi|453055250|gb|AGG20155.1| GCHV-induced protein 2 [Ctenopharyngodon idella]	_	_
	CI01000000_01176488_01180221	-4.25757	4.91281	4.04e-08	2.04e-06		gi|1020422252|ref|XP_016130199.1| PREDICTED: eukaryotic translation initiation factor 4E-binding protein 3-like [Sinocyclocheilus grahami]	_	_
	CI01000041_00478810_00481674	4.07714	7.55533	4.17e-08	2.11e-06		gi|358627679|gb|ADX97523.2| toll-like receptor 22 [Ctenopharyngodon idella]	K18808	_
	CI01000013_06025196_06025887	-5.02944	2.64631	4.22e-08	2.13e-06		gi|125843411|ref|XP_698627.2| PREDICTED: ADM-like [Danio rerio]	_	_
	CI01000016_00251025_00251471	-4.18972	5.15053	4.45e-08	2.24e-06		gi|1024990951|ref|XP_016315589.1| PREDICTED: GSK-3-binding protein-like [Sinocyclocheilus anshuiensis]	K03096	molecular_function:kinase activity(GO:0016301);biological_process:phosphorylation(GO:0016310)
	CI01000082_01097596_01106806	-4.11011	6.24517	4.46e-08	2.24e-06		gi|189536881|ref|XP_001333987.2| PREDICTED: cytochrome c oxidase subunit 4 isoform 1, mitochondrial [Danio rerio]	K02263	_
	CI01000010_02527705_02527980	-4.05754	7.8501	4.48e-08	2.25e-06			_	_
	CI01000059_06560307_06561286	4.52768	3.47839	4.56e-08	2.29e-06		gi|966652129|gb|KTF87031.1| hypothetical protein cypCar_00034587 [Cyprinus carpio]	K09310	_
	CI01000113_01072283_01091398	9.10458	1.52512	4.62e-08	2.31e-06		gi|1020424913|ref|XP_016131396.1| PREDICTED: neurogenic locus notch homolog protein 2-like [Sinocyclocheilus grahami]	K02599	_
	CI01000306_05456160_05473514	-9.07737	1.56601	4.62e-08	2.31e-06		gi|1025185854|ref|XP_016422256.1| PREDICTED: RING finger protein 207-like [Sinocyclocheilus rhinocerous]	_	_
	CI01000321_02433523_02469055	4.15642	5.32827	4.62e-08	2.31e-06		gi|642122224|emb|CDQ63705.1| unnamed protein product [Oncorhynchus mykiss]	K04446	_
	CI01000055_01852604_01874289	-4.02995	9.63816	4.74e-08	2.36e-06		gi|530453440|gb|AGT29869.1| fatty acid synthase [Hypophthalmichthys nobilis]	K00665	_
	CI01000069_04603992_04607459	-4.99559	2.91836	5.05e-08	2.51e-06		gi|1025093005|ref|XP_016343308.1| PREDICTED: brorin-like [Sinocyclocheilus anshuiensis]	_	_
	CI01000026_10347872_10351783	-4.01808	10.1953	5.07e-08	2.52e-06		gi|966699677|gb|KTG31918.1| hypothetical protein cypCar_00001286, partial [Cyprinus carpio]	K09055	biological_process:hemopoiesis(GO:0030097);molecular_function:sequence-specific DNA binding transcription factor activity(GO:0003700);molecular_function:sequence-specific DNA binding(GO:0043565);biological_process:regulation of transcription, DNA-templated(GO:0006355)
	CI01000033_01792241_01801250	-4.11729	5.5927	5.14e-08	2.55e-06		gi|966714250|gb|KTG46488.1| hypothetical protein cypCar_00040943 [Cyprinus carpio]	K17480	_
	CI01000027_09203231_09208317	-6.1851	1.92845	5.3e-08	2.62e-06		gi|1020503002|ref|XP_016090344.1| PREDICTED: protein Wnt-4-like [Sinocyclocheilus grahami]	K00408	biological_process:tertiary branching involved in mammary gland duct morphogenesis(GO:0060748);biological_process:endoderm development(GO:0007492);biological_process:canonical Wnt signaling pathway(GO:0060070);biological_process:renal vesicle formation(GO:0072033);biological_process:metanephros development(GO:0001656);biological_process:somatotropin secreting cell differentiation(GO:0060126);biol…
	CI01000030_04246567_04263697	-6.1851	1.92845	5.3e-08	2.62e-06		gi|1025305483|ref|XP_016382501.1| PREDICTED: ankyrin repeat domain-containing protein 24-like [Sinocyclocheilus rhinocerous]	_	_
	CI01000035_00018796_00020662	-4.10274	5.57901	5.61e-08	2.77e-06		gi|584086179|ref|XP_006762816.1| PREDICTED: heat shock cognate 71 kDa protein [Myotis davidii]<>gi|432104160|gb|ELK30986.1| 78 kDa glucose-regulated protein like protein [Myotis davidii]	K03283	molecular_function:nucleotide binding(GO:0000166)
	CI01000190_01374793_01382729	4.77144	2.73556	5.67e-08	2.79e-06			_	_
	CI01000092_01050305_01051867	-4.30354	4.05273	5.79e-08	2.85e-06		gi|1025122172|ref|XP_016412966.1| PREDICTED: mastermind-like protein 2 isoform X3 [Sinocyclocheilus rhinocerous]	K06061	_
	CI01000001_07531945_07539781	4.69453	2.87764	5.86e-08	2.88e-06		gi|966714095|gb|KTG46333.1| hypothetical protein cypCar_00034794 [Cyprinus carpio]	_	_
	CI01000063_05639341_05650366	5.70559	2.13154	5.93e-08	2.91e-06		gi|966641714|gb|KTF76628.1| hypothetical protein cypCar_00040849 [Cyprinus carpio]	_	_
	CI01000019_03587518_03616053	-4.00271	8.47274	6.02e-08	2.95e-06		gi|966637223|gb|KTF72327.1| hypothetical protein cypCar_00031589, partial [Cyprinus carpio]	K11445	_
	CI01000339_02706842_02710233	5.16234	2.54733	6.09e-08	2.98e-06		gi|1025125449|ref|XP_016413572.1| PREDICTED: GAS2-like protein 1 [Sinocyclocheilus rhinocerous]<>gi|1025125455|ref|XP_016413575.1| PREDICTED: GAS2-like protein 1 [Sinocyclocheilus rhinocerous]	_	_
	CI01000047_03449375_03457830	-4.96442	2.889	6.17e-08	3.01e-06		gi|1040659587|ref|XP_017213988.1| PREDICTED: serine/threonine-protein kinase BRSK2-like isoform X2 [Danio rerio]	K08796	_
	CI01000074_00143345_00144521	4.04714	6.34547	6.2e-08	3.02e-06		gi|1020601657|ref|XP_016117892.1| PREDICTED: protein THEM6 [Sinocyclocheilus grahami]	_	_
	CI01000325_06993469_06997933	-4.19203	4.6245	6.28e-08	3.06e-06		gi|1040673820|ref|XP_017207983.1| PREDICTED: Krueppel-like factor 11 isoform X1 [Danio rerio]	K09209	_
	CI01000347_00576004_00576843	-3.9821	11.3321	6.29e-08	3.06e-06		gi|1020511491|ref|XP_016094874.1| PREDICTED: CCAAT/enhancer-binding protein beta-like [Sinocyclocheilus grahami]	K10048	_
	CI01000000_10333352_10335572	-3.99697	8.24317	6.32e-08	3.07e-06		gi|1025189196|ref|XP_016423220.1| PREDICTED: fos-related antigen 1-like isoform X1 [Sinocyclocheilus rhinocerous]	_	_
	CI01000189_01310217_01313204	4.15149	4.76686	6.4e-08	3.1e-06		gi|1025286693|ref|XP_016372118.1| PREDICTED: leucine zipper protein 1-like [Sinocyclocheilus rhinocerous]<>gi|1025286697|ref|XP_016372126.1| PREDICTED: leucine zipper protein 1-like [Sinocyclocheilus rhinocerous]<>gi|1025286701|ref|XP_016372134.1| PREDICTED: leucine zipper protein 1-like [Sinocyclocheilus rhinocerous]	_	_
	CI01000319_05481484_05503159	4.50247	3.33124	6.42e-08	3.1e-06		gi|1020506678|ref|XP_016092322.1| PREDICTED: nectin-2-like isoform X1 [Sinocyclocheilus grahami]	_	_
	CI01000010_12250574_12262875	-5.50427	2.16928	6.43e-08	3.1e-06		gi|657558078|ref|XP_008283133.1| PREDICTED: phosphatidylinositol 4-kinase alpha isoform X1 [Stegastes partitus]	K00888	biological_process:phosphatidylinositol phosphorylation(GO:0046854);cellular_component:plasma membrane(GO:0005886);molecular_function:1-phosphatidylinositol 4-kinase activity(GO:0004430);biological_process:phosphatidylinositol-mediated signaling(GO:0048015)
	CI01000180_00796407_00812041	-3.98755	9.03797	6.43e-08	3.1e-06		gi|966701330|gb|KTG33571.1| hypothetical protein cypCar_00014043 [Cyprinus carpio]	K00911	_
	CI01000047_06983414_06988271	-4.04543	6.058	6.67e-08	3.21e-06		gi|1024951204|ref|XP_016296329.1| PREDICTED: cerebellar degeneration-related protein 2-like [Sinocyclocheilus anshuiensis]	_	_
	CI01000304_09494392_09503344	9.03545	1.45884	6.69e-08	3.21e-06		gi|1025310908|ref|XP_016383985.1| PREDICTED: protocadherin gamma-C5-like isoform X2 [Sinocyclocheilus rhinocerous]	K16497	cellular_component:integral component of membrane(GO:0016021);biological_process:homophilic cell adhesion via plasma membrane adhesion molecules(GO:0007156);molecular_function:calcium ion binding(GO:0005509);cellular_component:plasma membrane(GO:0005886)
	CI01000312_00909410_00935747	9.03545	1.45884	6.69e-08	3.21e-06		gi|966655180|gb|KTF90034.1| hypothetical protein cypCar_00008068 [Cyprinus carpio]	K08784	_
	CI01105196_00005590_00005772	9.03545	1.45884	6.69e-08	3.21e-06			_	_
	CI01033333_00000158_00000477	-9.01609	1.50887	6.69e-08	3.21e-06		gi|688543912|ref|XP_009297896.1| PREDICTED: uncharacterized protein ighv4-5 [Danio rerio]	_	_
	CI01000010_09598506_09604197	-4.94264	2.56503	6.91e-08	3.3e-06		gi|1025138525|ref|XP_016352983.1| PREDICTED: protein SSUH2 homolog [Sinocyclocheilus anshuiensis]	_	_
	CI01000039_07259359_07263181	-4.64077	3.23269	6.93e-08	3.31e-06		gi|1025147827|ref|XP_016416011.1| PREDICTED: protein phosphatase 1 regulatory subunit 14A-like [Sinocyclocheilus rhinocerous]	K12328	_
	CI01000021_01791577_01796792	-3.9816	8.18229	6.96e-08	3.32e-06		gi|1025234373|ref|XP_016364657.1| PREDICTED: src-like-adapter 2 isoform X1 [Sinocyclocheilus rhinocerous]	_	_
	CI01000030_00914537_00924799	4.0066	6.71577	7.1e-08	3.38e-06		gi|1011615389|gb|KYO49037.1| tropomyosin alpha-3 chain isoform A [Alligator mississippiensis]	K10375	_
	CI01000009_08632210_08646938	-6.13786	1.88431	7.11e-08	3.38e-06		gi|1024920794|ref|XP_016336342.1| PREDICTED: SH3 domain-binding protein 4-like [Sinocyclocheilus anshuiensis]<>gi|1024920796|ref|XP_016336412.1| PREDICTED: SH3 domain-binding protein 4-like [Sinocyclocheilus anshuiensis]	_	_
	CI01000325_05941338_05958627	-4.28672	4.18597	7.15e-08	3.39e-06		gi|1020399433|ref|XP_016150134.1| PREDICTED: C-1-tetrahydrofolate synthase, cytoplasmic-like isoform X1 [Sinocyclocheilus grahami]<>gi|1020399435|ref|XP_016150141.1| PREDICTED: C-1-tetrahydrofolate synthase, cytoplasmic-like isoform X1 [Sinocyclocheilus grahami]	K00288	_
	CI01000012_01671522_01672166	4.51516	3.20862	7.21e-08	3.41e-06		gi|966645200|gb|KTF80112.1| hypothetical protein cypCar_00022466 [Cyprinus carpio]	K01097	_
	CI01000016_03726678_03729904	4.51516	3.20862	7.21e-08	3.41e-06		gi|966641093|gb|KTF76007.1| hypothetical protein cypCar_00043820 [Cyprinus carpio]	_	_
	CI01000015_06736494_06753296	4.18071	4.5922	7.23e-08	3.42e-06		gi|1025296235|ref|XP_016379981.1| PREDICTED: apoptosis-stimulating of p53 protein 2-like isoform X1 [Sinocyclocheilus rhinocerous]	K16823	_
	CI01000069_00000091_00001650	-3.96982	8.77367	7.26e-08	3.43e-06		gi|346652550|gb|AEO44578.1| hsp70 protein [Cyprinus carpio]	K03283	_
	CI01000012_13324234_13357963	-4.14729	4.67744	7.36e-08	3.47e-06		gi|1020487790|ref|XP_016149561.1| PREDICTED: sorbin and SH3 domain-containing protein 1-like, partial [Sinocyclocheilus grahami]	K06086	_
	CI01000026_03950848_03969190	-4.38933	3.67473	7.45e-08	3.51e-06		gi|1020419447|ref|XP_016128707.1| PREDICTED: tripartite motif-containing protein 66-like [Sinocyclocheilus grahami]	K12032	_
	CI01000188_00114857_00142923	-4.0215	6.30556	7.56e-08	3.55e-06		gi|1025033823|ref|XP_016325693.1| PREDICTED: phospholipid-transporting ATPase IC-like [Sinocyclocheilus anshuiensis]	K01530	_
	CI01000053_00094748_00113755	-4.00502	6.6513	7.56e-08	3.55e-06		gi|1024960372|ref|XP_016301197.1| PREDICTED: serine/threonine-protein kinase ULK2-like isoform X1 [Sinocyclocheilus anshuiensis]	K08269	_
	CI01000066_00832790_00856736	9.01165	1.43606	7.6e-08	3.55e-06		gi|1024963649|ref|XP_016302959.1| PREDICTED: signal peptide, CUB and EGF-like domain-containing protein 1 isoform X2 [Sinocyclocheilus anshuiensis]	_	_
	CI01120186_00000229_00001274	9.01165	1.43606	7.6e-08	3.55e-06		gi|1025115531|ref|XP_016404327.1| PREDICTED: polymeric immunoglobulin receptor-like [Sinocyclocheilus rhinocerous]	_	_
	CI01000004_03126603_03131458	-8.99507	1.4893	7.6e-08	3.55e-06		gi|1025292844|ref|XP_016379048.1| PREDICTED: protein FAM151A [Sinocyclocheilus rhinocerous]	_	_
	CI01000047_00558772_00579870	-4.03351	5.92641	7.81e-08	3.64e-06		gi|966656847|gb|KTF91701.1| hypothetical protein cypCar_00013370 [Cyprinus carpio]	K08292	_
	CI01141296_00000089_00000878	5.11694	2.50391	7.84e-08	3.66e-06		gi|1024964947|ref|XP_016303644.1| PREDICTED: carcinoembryonic antigen-related cell adhesion molecule 21-like [Sinocyclocheilus anshuiensis]	_	_
	CI01000008_01457543_01508756	6.30392	1.81617	7.86e-08	3.66e-06		gi|1025311866|ref|XP_016384237.1| PREDICTED: high affinity cAMP-specific and IBMX-insensitive 3',5'-cyclic phosphodiesterase 8B [Sinocyclocheilus rhinocerous]	K18437	_
	CI01000030_02843446_02856037	4.30598	3.92135	8.14e-08	3.78e-06		gi|1024954596|ref|XP_016298147.1| PREDICTED: voltage-dependent calcium channel beta subunit-associated regulatory protein-like isoform X1 [Sinocyclocheilus anshuiensis]	_	_
	CI01160407_00001396_00005788	-4.01648	6.11102	8.23e-08	3.82e-06		gi|1025288432|ref|XP_016376722.1| PREDICTED: leukotriene-B(4) omega-hydroxylase 2-like [Sinocyclocheilus rhinocerous]<>gi|1025288436|ref|XP_016376727.1| PREDICTED: leukotriene-B(4) omega-hydroxylase 2-like [Sinocyclocheilus rhinocerous]	K17726	molecular_function:heme binding(GO:0020037);molecular_function:oxidoreductase activity, acting on paired donors, with incorporation or reduction of molecular oxygen(GO:0016705);molecular_function:monooxygenase activity(GO:0004497);molecular_function:iron ion binding(GO:0005506);molecular_function:electron carrier activity(GO:0009055);biological_process:oxidation-reduction process(GO:0055114)
	CI01000345_01154151_01154582	-5.46442	2.13207	8.26e-08	3.83e-06		gi|169135202|gb|ACA48501.1| Cbp/p300-interacting transactivator 1 [Ctenopharyngodon idella]<>gi|169160090|gb|ACA49546.1| Cbp/p300-interacting transactivator with Glu/Asp-rich carboxy-terminal domain 1 [Ctenopharyngodon idella]	_	_
	CI01000027_07692521_07693509	-4.05187	5.57819	8.39e-08	3.88e-06		gi|1025296795|ref|XP_016380128.1| PREDICTED: C-type lectin domain family 9 member A-like isoform X1 [Sinocyclocheilus rhinocerous]	_	_
	CI01000127_01693638_01696404	4.05999	5.2114	8.4e-08	3.88e-06		gi|1020499449|ref|XP_016088459.1| PREDICTED: vesicle transport protein GOT1B-like [Sinocyclocheilus grahami]	_	_
	CI01000009_00222702_00228950	3.97658	6.87883	8.48e-08	3.91e-06		gi|1020508769|ref|XP_016093422.1| PREDICTED: dnaJ homolog subfamily C member 3 [Sinocyclocheilus grahami]	K09523	_
	CI01000138_00429867_00441975	4.05381	5.33062	8.6e-08	3.96e-06		gi|1024949722|ref|XP_016295547.1| PREDICTED: programmed cell death 1 ligand 1-like [Sinocyclocheilus anshuiensis]	_	_
	CI01042083_00000445_00001546	4.52263	3.06719	8.61e-08	3.96e-06		gi|1025045800|ref|XP_016328952.1| PREDICTED: TRPM8 channel-associated factor homolog isoform X1 [Sinocyclocheilus anshuiensis]	_	_
	CI01000105_00218267_00227612	8.98745	1.41292	8.64e-08	3.96e-06			_	_
	CI01000189_00693840_00694391	-8.97374	1.46946	8.64e-08	3.96e-06		gi|657532835|ref|XP_008305108.1| PREDICTED: TMF-regulated nuclear protein 1 [Stegastes partitus]	_	_
	CI01000340_15396096_15416084	-8.97374	1.46946	8.64e-08	3.96e-06		gi|1020414331|ref|XP_016125961.1| PREDICTED: LOW QUALITY PROTEIN: protein FAM65C [Sinocyclocheilus grahami]	_	_
	CI01000055_04312501_04314406	4.44906	3.28057	8.68e-08	3.97e-06		gi|1025198227|ref|XP_016425308.1| PREDICTED: uncharacterized protein LOC107753617 isoform X1 [Sinocyclocheilus rhinocerous]<>gi|1025198231|ref|XP_016425309.1| PREDICTED: uncharacterized protein LOC107753617 isoform X2 [Sinocyclocheilus rhinocerous]	_	_
	CI01000004_06273065_06297895	-6.10549	1.8541	8.69e-08	3.97e-06		gi|1024924120|ref|XP_016345741.1| PREDICTED: unconventional myosin-VIIa-like [Sinocyclocheilus anshuiensis]	K10359	_
	CI01000319_05882023_05885700	-6.10549	1.8541	8.69e-08	3.97e-06		gi|1024924782|ref|XP_016349313.1| PREDICTED: SLA class II histocompatibility antigen, DQ haplotype D beta chain-like [Sinocyclocheilus anshuiensis]	_	_
	CI01000047_06327240_06328630	4.47902	3.17435	8.84e-08	4.03e-06		gi|1024951128|ref|XP_016296289.1| PREDICTED: 6-pyruvoyl tetrahydrobiopterin synthase [Sinocyclocheilus anshuiensis]	_	_
	CI01000010_02088040_02092555	-4.35692	3.64435	8.92e-08	4.06e-06		gi|1025143701|ref|XP_016415253.1| PREDICTED: 5-aminolevulinate synthase, erythroid-specific, mitochondrial [Sinocyclocheilus rhinocerous]	K00643	biological_process:response to hypoxia(GO:0001666);biological_process:heme biosynthetic process(GO:0006783);cellular_component:mitochondrial inner membrane(GO:0005743);molecular_function:5-aminolevulinate synthase activity(GO:0003870);biological_process:embryonic hemopoiesis(GO:0035162);biological_process:erythrocyte differentiation(GO:0030218);cellular_component:mitochondrial matrix(GO:0005759);…
	CI01000197_00216471_00217039	-3.95181	7.55561	8.96e-08	4.07e-06			_	_
	CI01000013_00537410_00556704	4.03671	5.4073	9.41e-08	4.27e-06		gi|1025279184|ref|XP_016376798.1| PREDICTED: alpha-protein kinase 3-like isoform X1 [Sinocyclocheilus rhinocerous]	K08868	_
	CI01000026_11266022_11278889	-3.93706	7.73685	9.43e-08	4.27e-06		gi|1024944731|ref|XP_016361368.1| PREDICTED: lymphocyte-specific protein 1-like isoform X1 [Sinocyclocheilus anshuiensis]	_	_
	CI01000063_04594405_04629754	-3.95676	6.81395	9.49e-08	4.3e-06		gi|1024960111|ref|XP_016301060.1| PREDICTED: supervillin-like isoform X1 [Sinocyclocheilus anshuiensis]	K10369	_
	CI01000325_03548202_03550329	4.03888	5.08307	9.57e-08	4.33e-06		gi|1025115531|ref|XP_016404327.1| PREDICTED: polymeric immunoglobulin receptor-like [Sinocyclocheilus rhinocerous]	_	_
	CI01000012_13041401_13060443	-6.07237	1.82325	9.63e-08	4.34e-06		gi|528498226|ref|XP_690089.4| PREDICTED: pecanex-like protein 2 isoform X1 [Danio rerio]	_	_
	CI01000036_02022324_02026053	-5.43723	2.10671	9.8e-08	4.42e-06		gi|1040670091|ref|XP_017207691.1| PREDICTED: OTU domain-containing protein 6B isoform X1 [Danio rerio]	_	_
	CI01000027_01775507_01793407	8.96283	1.3894	9.84e-08	4.43e-06		gi|1020465060|ref|XP_016137450.1| PREDICTED: PHD finger protein 1-like [Sinocyclocheilus grahami]	K11467	_
	CI01000142_00523476_00525518	3.91028	10.1401	9.85e-08	4.43e-06		gi|18858227|ref|NP_571565.1| major histocompatibility complex class II integral membrane alpha chain precursor [Danio rerio]<>gi|311205|gb|AAA72019.1| unnamed protein product [Danio rerio]	K06752	cellular_component:membrane(GO:0016020);biological_process:immune system process(GO:0002376)
	CI01000006_01649163_01661667	-4.01404	5.61041	9.94e-08	4.46e-06		gi|1025115651|ref|XP_016404669.1| PREDICTED: rap1 GTPase-activating protein 2-like isoform X3 [Sinocyclocheilus rhinocerous]	K17708	_
	CI01000333_00306908_00314083	-4.00834	5.49041	1e-07	4.49e-06		gi|1024970867|ref|XP_016306842.1| PREDICTED: ras-related protein Rab-3D-like [Sinocyclocheilus anshuiensis]<>gi|1024970869|ref|XP_016306843.1| PREDICTED: ras-related protein Rab-3D-like [Sinocyclocheilus anshuiensis]<>gi|1024970871|ref|XP_016306844.1| PREDICTED: ras-related protein Rab-3D-like [Sinocyclocheilus anshuiensis]	K07884	_
	CI01000009_15726357_15736168	4.00348	5.56524	1.01e-07	4.52e-06		gi|966706619|gb|KTG38860.1| hypothetical protein cypCar_00036436 [Cyprinus carpio]	K00058	molecular_function:NAD binding(GO:0051287);molecular_function:phosphoglycerate dehydrogenase activity(GO:0004617);biological_process:L-serine biosynthetic process(GO:0006564);biological_process:oxidation-reduction process(GO:0055114)
	CI01000395_00108634_00111326	4.76935	2.48057	1.02e-07	4.54e-06		gi|1020569489|ref|XP_016113364.1| PREDICTED: reticulon-4-like [Sinocyclocheilus grahami]	_	_
	CI01000118_00380301_00394726	3.94397	6.648	1.04e-07	4.64e-06		gi|1020577358|ref|XP_016114921.1| PREDICTED: presequence protease, mitochondrial [Sinocyclocheilus grahami]	K06972	_
	CI01000339_00416204_00453589	-4.02612	5.32948	1.04e-07	4.64e-06		gi|972948172|ref|XP_015214544.1| PREDICTED: calcium/calmodulin-dependent protein kinase type II subunit beta isoform X10 [Lepisosteus oculatus]	K04515	_
	CI01000006_11436920_11440304	-5.42345	2.09386	1.07e-07	4.75e-06		gi|1025361601|ref|XP_016403732.1| PREDICTED: neural proliferation differentiation and control protein 1-like isoform X1 [Sinocyclocheilus rhinocerous]	_	_
	CI01000147_00426318_00471016	4.34259	3.52145	1.07e-07	4.75e-06		gi|1025092342|ref|XP_016343126.1| PREDICTED: LOW QUALITY PROTEIN: cytoplasmic dynein 2 heavy chain 1 [Sinocyclocheilus anshuiensis]	K10414	_
	CI01000319_01772963_01786837	4.17993	3.94502	1.07e-07	4.77e-06		gi|1025376488|ref|XP_016399286.1| PREDICTED: SH3 domain-binding protein 5-like isoform X2 [Sinocyclocheilus rhinocerous]	_	_
	CI01000140_00043760_00065477	4.01827	5.14579	1.08e-07	4.79e-06		gi|1020578832|ref|XP_016115201.1| PREDICTED: aryl hydrocarbon receptor repressor-like [Sinocyclocheilus grahami]	K09094	_
	CI01000027_04008272_04011121	8.93779	1.36551	1.12e-07	4.97e-06		gi|1024983809|ref|XP_016313650.1| PREDICTED: sialic acid-binding Ig-like lectin 15 [Sinocyclocheilus anshuiensis]	K16352	_
	CI01000024_03669290_03670963	5.0581	2.44774	1.16e-07	5.12e-06		gi|1025233283|ref|XP_016364353.1| PREDICTED: frizzled-7 [Sinocyclocheilus rhinocerous]	K02432	_
	CI01000051_03576487_03580370	5.59766	2.02827	1.17e-07	5.14e-06			_	_
	CI01000136_00283083_00288092	4.52306	2.90207	1.17e-07	5.16e-06		gi|317419601|emb|CBN81638.1| Tektin-3 [Dicentrarchus labrax]	K18630	_
	CI01000189_00537167_00546397	-4.63082	3.03844	1.18e-07	5.19e-06		gi|1024991535|ref|XP_016315907.1| PREDICTED: grainyhead-like protein 3 homolog [Sinocyclocheilus anshuiensis]	K09275	_
	CI01039383_00002862_00005538	-6.03848	1.79171	1.18e-07	5.2e-06		gi|966696270|gb|KTG28668.1| hypothetical protein cypCar_00028320 [Cyprinus carpio]	_	_
	CI01000212_00097571_00110480	3.90877	6.94188	1.21e-07	5.29e-06		gi|545604907|gb|AGW43283.1| interleukin-1 receptor 2 [Ctenopharyngodon idella]	_	_
	CI01000339_03376850_03378630	-3.89437	7.76255	1.22e-07	5.33e-06		gi|127519397|gb|ABO28528.1| BTEB transcription factor [Pimephales promelas]	_	_
	CI01000340_14121598_14122814	-3.92266	6.70628	1.22e-07	5.36e-06		gi|1025245493|ref|XP_016367693.1| PREDICTED: uncharacterized protein LOC107708059 [Sinocyclocheilus rhinocerous]	_	_
	CI01000304_11272501_11275583	3.95583	5.88426	1.23e-07	5.37e-06		gi|597777750|ref|XP_007252525.1| PREDICTED: erythrocyte band 7 integral membrane protein-like [Astyanax mexicanus]	K17286	_
	CI01000170_00020847_00026330	-3.91708	6.5035	1.27e-07	5.53e-06		gi|1020528296|ref|XP_016103799.1| PREDICTED: cytosolic phospholipase A2 gamma-like [Sinocyclocheilus grahami]	K16342	_
	CI01000304_06331541_06373056	-5.05934	2.288	1.27e-07	5.54e-06		gi|989973215|ref|XP_015448307.1| PREDICTED: chondroitin sulfate N-acetylgalactosaminyltransferase 1 isoform X1 [Pteropus alecto]<>gi|431902212|gb|ELK08713.1| Chondroitin sulfate N-acetylgalactosaminyltransferase 1 [Pteropus alecto]	K00746	_
	CI01024401_00001523_00004464	-5.38127	2.0546	1.27e-07	5.54e-06		gi|966651730|gb|KTF86632.1| hypothetical protein cypCar_00041122, partial [Cyprinus carpio]	_	_
	CI01000027_05205628_05209568	8.91231	1.34121	1.28e-07	5.54e-06		gi|1042245370|ref|XP_017323305.1| PREDICTED: adenosine receptor A2b-like [Ictalurus punctatus]	_	_
	CI01000030_09876738_09883981	8.91231	1.34121	1.28e-07	5.54e-06		gi|966705555|gb|KTG37796.1| hypothetical protein cypCar_00039479 [Cyprinus carpio]	_	_
	CI01000047_06487774_06496807	8.91231	1.34121	1.28e-07	5.54e-06		gi|966650069|gb|KTF84979.1| hypothetical protein cypCar_00012336 [Cyprinus carpio]	K11167	cellular_component:extracellular region(GO:0005576);molecular_function:oxidoreductase activity(GO:0016491);biological_process:oxidation-reduction process(GO:0055114);molecular_function:nucleotide binding(GO:0000166)
	CI01022453_00001520_00002797	8.91231	1.34121	1.28e-07	5.54e-06		gi|1020398983|ref|XP_016147804.1| PREDICTED: Wilms tumor protein 1-interacting protein homolog [Sinocyclocheilus grahami]	K16682	biological_process:transcription, DNA-templated(GO:0006351);biological_process:regulation of cell morphogenesis(GO:0022604);molecular_function:transcription corepressor activity(GO:0003714);biological_process:cloaca development(GO:0035844);biological_process:establishment of mitotic spindle orientation(GO:0000132);biological_process:neural crest cell development(GO:0014032);cellular_component:cil…
	CI01000005_04296779_04299727	-8.90778	1.40822	1.28e-07	5.54e-06		gi|966712453|gb|KTG44691.1| hypothetical protein cypCar_00028080 [Cyprinus carpio]	_	_
	CI01000117_00236562_00241580	-4.71472	2.90463	1.29e-07	5.58e-06		gi|1025277018|ref|XP_016376225.1| PREDICTED: cathepsin L1-like [Sinocyclocheilus rhinocerous]	_	_
	CI01000054_08091223_08096443	3.90544	6.61188	1.31e-07	5.67e-06		gi|1020414982|ref|XP_016126315.1| PREDICTED: tyrosine--tRNA ligase, cytoplasmic [Sinocyclocheilus grahami]	K01866	molecular_function:ATP binding(GO:0005524);biological_process:tyrosyl-tRNA aminoacylation(GO:0006437);molecular_function:tRNA binding(GO:0000049);molecular_function:tyrosine-tRNA ligase activity(GO:0004831);cellular_component:cytoplasm(GO:0005737)
	CI01000028_02165692_02171949	-4.22966	3.72644	1.35e-07	5.8e-06		gi|1025106846|ref|XP_016347075.1| PREDICTED: uncharacterized protein LOC107692501 [Sinocyclocheilus anshuiensis]	_	_
	CI01000251_00121390_00133839	-4.0963	4.37956	1.37e-07	5.9e-06		gi|1025141741|ref|XP_016414901.1| PREDICTED: phosphomannomutase 1 isoform X1 [Sinocyclocheilus rhinocerous]	K17497	_
	CI01000152_00964426_00993642	-3.93357	5.98576	1.41e-07	6.07e-06		gi|966642138|gb|KTF77050.1| hypothetical protein cypCar_00025611 [Cyprinus carpio]	_	_
	CI01000063_01537233_01540577	-6.00377	1.75946	1.46e-07	6.28e-06		gi|1020414809|ref|XP_016126223.1| PREDICTED: meiosis-specific with OB domain-containing protein-like [Sinocyclocheilus grahami]	_	_
	CI01000119_01289193_01294766	8.88637	1.31651	1.47e-07	6.29e-06		gi|1025038675|ref|XP_016326999.1| PREDICTED: leucine-rich repeat-containing protein 58-like [Sinocyclocheilus anshuiensis]	_	_
	CI01151006_00000713_00001279	-4.59468	3.00463	1.49e-07	6.36e-06		gi|1020554940|ref|XP_016110443.1| PREDICTED: tetratricopeptide repeat protein 39B-like [Sinocyclocheilus grahami]	_	_
	CI01000153_00204992_00211181	5.54882	1.98167	1.52e-07	6.49e-06		gi|1025309917|ref|XP_016383720.1| PREDICTED: low-density lipoprotein receptor-related protein 5-like [Sinocyclocheilus rhinocerous]	K03068	cellular_component:integral component of membrane(GO:0016021);biological_process:regulation of canonical Wnt signaling pathway(GO:0060828)
	CI01000118_00497168_00498145	-3.86545	7.41298	1.52e-07	6.49e-06		gi|1025387869|ref|XP_016404377.1| PREDICTED: lysophosphatidic acid receptor 6-like [Sinocyclocheilus rhinocerous]	_	_
	CI01000317_00060869_00070360	-3.94213	5.37994	1.56e-07	6.63e-06		gi|1020472171|ref|XP_016141236.1| PREDICTED: homer protein homolog 2-like isoform X1 [Sinocyclocheilus grahami]	_	_
	CI01000024_04390651_04399366	-3.91503	5.85088	1.57e-07	6.66e-06		gi|1025045439|ref|XP_016328856.1| PREDICTED: protein Wiz-like isoform X1 [Sinocyclocheilus anshuiensis]<>gi|1025045443|ref|XP_016328857.1| PREDICTED: protein Wiz-like isoform X1 [Sinocyclocheilus anshuiensis]	_	_
	CI01000013_04186280_04202524	6.16847	1.68677	1.63e-07	6.93e-06		gi|1025393880|ref|XP_016406002.1| PREDICTED: uveal autoantigen with coiled-coil domains and ankyrin repeats-like isoform X2 [Sinocyclocheilus rhinocerous]	_	_
	CI01000001_00238241_00249437	3.98709	4.68573	1.7e-07	7.2e-06		gi|1025204533|ref|XP_016427020.1| PREDICTED: G-protein-signaling modulator 2-like isoform X1 [Sinocyclocheilus rhinocerous]	K15837	_
	CI01141302_00000010_00000326	-4.28678	3.46659	1.71e-07	7.23e-06		gi|335987425|gb|AEH76780.1| immunoglobulin light chain L3.2, partial [Ctenopharyngodon idella]	_	_
	CI01000059_06743553_06768560	4.98417	2.37734	1.74e-07	7.38e-06		gi|1025400351|ref|XP_016407760.1| PREDICTED: kinesin-like protein KIF1C isoform X1 [Sinocyclocheilus rhinocerous]	K10392	_
	CI01000196_00440127_00455708	-4.11722	4.09632	1.8e-07	7.6e-06		gi|1025081152|ref|XP_016340069.1| PREDICTED: RNA-binding protein 10-like [Sinocyclocheilus anshuiensis]	K13094	_
	CI01021200_00004809_00010096	3.8209	8.61183	1.8e-07	7.62e-06		gi|1025034596|ref|XP_016325908.1| PREDICTED: guanylate-binding protein 1-like [Sinocyclocheilus anshuiensis]	_	_
	CI01000304_07183432_07198305	-5.9682	1.72646	1.82e-07	7.66e-06		gi|1020509547|ref|XP_016093836.1| PREDICTED: cytosolic purine 5'-nucleotidase-like [Sinocyclocheilus grahami]	K01081	molecular_function:metal ion binding(GO:0046872);biological_process:response to chemical(GO:0042221)
	CI01000029_02742245_02743081	3.82389	8.22008	1.82e-07	7.66e-06		gi|1025289362|ref|XP_016379318.1| PREDICTED: gap junction Cx32.2 protein-like [Sinocyclocheilus rhinocerous]	K07372	_
	CI01000182_00041262_00051412	3.87619	5.85488	1.83e-07	7.68e-06		gi|1025273829|ref|XP_016375345.1| PREDICTED: CD209 antigen-like protein E isoform X1 [Sinocyclocheilus rhinocerous]<>gi|1025273833|ref|XP_016375346.1| PREDICTED: CD209 antigen-like protein E isoform X2 [Sinocyclocheilus rhinocerous]	_	_
	CI01000010_06731227_06734221	-3.9158	5.47377	1.89e-07	7.92e-06		gi|1025332963|ref|XP_016389999.1| PREDICTED: uncharacterized protein LOC107725298 isoform X1 [Sinocyclocheilus rhinocerous]	_	_
	CI01000304_10528999_10530630	-3.87557	5.88239	1.9e-07	7.96e-06		gi|966642876|gb|KTF77788.1| hypothetical protein cypCar_00038057 [Cyprinus carpio]	_	_
	CI01000000_00588173_00605818	4.22655	3.50988	1.9e-07	7.96e-06		gi|1024967234|ref|XP_016304886.1| PREDICTED: SH2 domain-containing protein 4A-like [Sinocyclocheilus anshuiensis]	_	_
	CI01000018_04832762_04833610	-3.99075	4.53107	1.91e-07	8.01e-06		gi|1024951863|ref|XP_016296675.1| PREDICTED: arylamine N-acetyltransferase, pineal gland isozyme NAT-3-like [Sinocyclocheilus anshuiensis]	_	_
	CI01000180_00789489_00792679	-3.98566	4.52632	1.98e-07	8.27e-06		gi|1025162041|ref|XP_016418436.1| PREDICTED: UPF0692 protein C19orf54 homolog isoform X1 [Sinocyclocheilus rhinocerous]	_	_
	CI01044550_00000123_00001326	-5.95009	1.70967	2.03e-07	8.47e-06		gi|528510293|ref|XP_685984.6| PREDICTED: nesprin-1 isoform X1 [Danio rerio]	_	_
	CI01000010_06641409_06655700	-3.91666	4.99332	2.14e-07	8.91e-06		gi|1020481001|ref|XP_016145953.1| PREDICTED: LOW QUALITY PROTEIN: sperm-associated antigen 17-like [Sinocyclocheilus grahami]	_	_
	CI01000006_01531182_01543508	3.83894	6.34836	2.14e-07	8.91e-06		gi|966673495|gb|KTG06876.1| hypothetical protein cypCar_00002119 [Cyprinus carpio]	K01755	molecular_function:catalytic activity(GO:0003824)
	CI01000082_02786089_02793623	-3.81998	6.70442	2.17e-07	9.02e-06		gi|1025395633|ref|XP_016406482.1| PREDICTED: cAMP-responsive element modulator-like [Sinocyclocheilus rhinocerous]	_	_
	CI01000063_02195608_02203412	3.90509	4.92915	2.18e-07	9.05e-06		gi|66472867|ref|NP_001018618.1| meiotic recombination protein DMC1/LIM15 homolog [Danio rerio]<>gi|63852092|dbj|BAD98462.1| RecA homolog Dmc1 [Danio rerio]	K10872	molecular_function:DNA binding(GO:0003677);molecular_function:ATP binding(GO:0005524);biological_process:reciprocal meiotic recombination(GO:0007131);molecular_function:DNA-dependent ATPase activity(GO:0008094);cellular_component:nucleus(GO:0005634)
	CI01000029_03324084_03378615	-3.80569	7.21884	2.2e-07	9.11e-06		gi|1025344314|ref|XP_016393029.1| PREDICTED: LOW QUALITY PROTEIN: centrosomal protein of 85 kDa-like [Sinocyclocheilus rhinocerous]	_	_
	CI01000018_01005482_01007949	5.15104	2.14438	2.2e-07	9.11e-06		gi|1025114502|ref|XP_016348802.1| PREDICTED: thiamine-triphosphatase-like isoform X2 [Sinocyclocheilus anshuiensis]	K05307	_
	CI01000325_04744053_04749874	4.15162	3.69863	2.21e-07	9.13e-06		gi|1025314016|ref|XP_016384826.1| PREDICTED: carbohydrate sulfotransferase 14 [Sinocyclocheilus rhinocerous]	K08105	_
	CI01000027_05805062_05805690	3.84335	5.82419	2.23e-07	9.16e-06		gi|1025288385|ref|XP_016376603.1| PREDICTED: uncharacterized protein LOC107715075 [Sinocyclocheilus rhinocerous]	_	_
	CI01000018_03661621_03698552	8.83305	1.26581	2.23e-07	9.16e-06			_	_
	CI01000028_01716012_01751372	8.83305	1.26581	2.23e-07	9.16e-06		gi|966701739|gb|KTG33980.1| hypothetical protein cypCar_00012080 [Cyprinus carpio]	_	_
	CI01000055_05925014_05930723	8.83305	1.26581	2.23e-07	9.16e-06		gi|1025052460|ref|XP_016330720.1| PREDICTED: aggrecan core protein-like [Sinocyclocheilus anshuiensis]	_	_
	CI01112128_00000441_00000847	-8.81487	1.32224	2.23e-07	9.16e-06		gi|966704670|gb|KTG36911.1| hypothetical protein cypCar_00036484 [Cyprinus carpio]	K12047	_
	CI01000304_17605385_17608254	-3.78335	8.92136	2.25e-07	9.24e-06		gi|1020412543|ref|XP_016125001.1| PREDICTED: arachidonate 5-lipoxygenase-activating protein-like [Sinocyclocheilus grahami]	_	_
	CI01000034_04985101_04985760	6.10629	1.6276	2.27e-07	9.3e-06		gi|966636750|gb|KTF71854.1| hypothetical protein cypCar_00045093 [Cyprinus carpio]	K01557	_
	CI01000189_00557254_00592764	-3.81214	6.85231	2.29e-07	9.38e-06		gi|1025286775|ref|XP_016372298.1| PREDICTED: connector enhancer of kinase suppressor of ras 2-like isoform X5 [Sinocyclocheilus rhinocerous]	_	_
	CI01000010_07051047_07053923	-3.98007	4.6101	2.3e-07	9.41e-06		gi|966707168|gb|KTG39409.1| hypothetical protein cypCar_00045827 [Cyprinus carpio]	_	_
	CI01000340_14509233_14513910	-4.51185	2.92733	2.4e-07	9.79e-06		gi|1028908878|ref|NP_001313351.1| tubulin beta-1 chain [Danio rerio]	K07375	_
	CI01000133_01271640_01272900	-5.27779	1.95857	2.41e-07	9.81e-06		gi|1025160432|ref|XP_016355886.1| PREDICTED: cyclin-dependent kinase inhibitor 1-like isoform X1 [Sinocyclocheilus anshuiensis]	_	_
	CI01000218_00189439_00192976	-3.78163	7.52278	2.45e-07	9.99e-06		gi|292621869|ref|XP_002664803.1| PREDICTED: delta(14)-sterol reductase [Danio rerio]	_	_
	CI01000004_12764916_12775989	-3.81235	6.36049	2.47e-07	1.01e-05		gi|1025399482|ref|XP_016407520.1| PREDICTED: sodium- and chloride-dependent glycine transporter 1-like isoform X1 [Sinocyclocheilus rhinocerous]	K05038	_
	CI01000027_07581095_07587079	4.9327	2.32843	2.48e-07	1.01e-05		gi|1025093810|ref|XP_016343528.1| PREDICTED: synaptotagmin-11-like isoform X1 [Sinocyclocheilus anshuiensis]	_	_
	CI01000060_01212798_01226746	-3.82633	5.99437	2.51e-07	1.02e-05		gi|1025339332|ref|XP_016391692.1| PREDICTED: pleckstrin homology domain-containing family G member 3-like isoform X1 [Sinocyclocheilus rhinocerous]	_	_
	CI01000012_12540676_12541954	-5.91316	1.67549	2.54e-07	1.03e-05		gi|1025118363|ref|XP_016412259.1| PREDICTED: homeobox protein MSH-C [Sinocyclocheilus rhinocerous]	K09341	biological_process:regulation of transcription, DNA-templated(GO:0006355);molecular_function:sequence-specific DNA binding(GO:0043565);biological_process:otic placode formation(GO:0043049);molecular_function:sequence-specific DNA binding transcription factor activity(GO:0003700);cellular_component:nucleus(GO:0005634)
	CI01000071_01076503_01085064	4.24095	3.20713	2.56e-07	1.03e-05		gi|1025406498|ref|XP_016409405.1| PREDICTED: mevalonate kinase-like isoform X1 [Sinocyclocheilus rhinocerous]	K00869	_
	CI01000004_00756665_00768994	8.80563	1.23979	2.57e-07	1.03e-05		gi|1025280449|ref|XP_016377146.1| PREDICTED: discoidin domain-containing receptor 2-like [Sinocyclocheilus rhinocerous]	K05125	_
	CI01000006_04776793_04779651	8.80563	1.23979	2.57e-07	1.03e-05		gi|528513795|ref|XP_698041.5| PREDICTED: protein turtle homolog B-like isoform X4 [Danio rerio]	_	_
	CI01000020_00648652_00656756	8.80563	1.23979	2.57e-07	1.03e-05		gi|1025130044|ref|XP_016351433.1| PREDICTED: chloride anion exchanger-like [Sinocyclocheilus anshuiensis]	_	biological_process:sulfate transport(GO:0008272);biological_process:anion homeostasis(GO:0055081);molecular_function:sodium:bicarbonate symporter activity(GO:0008510);biological_process:transmembrane transport(GO:0055085);cellular_component:integral component of membrane(GO:0016021);molecular_function:secondary active sulfate transmembrane transporter activity(GO:0008271);biological_process:respo…
	CI01000340_04748822_04770480	8.80563	1.23979	2.57e-07	1.03e-05		gi|1024964375|ref|XP_016303340.1| PREDICTED: putative tyrosine-protein phosphatase auxilin isoform X1 [Sinocyclocheilus anshuiensis]	K09526	_
	CI01072798_00000101_00001693	8.80563	1.23979	2.57e-07	1.03e-05		gi|1020512049|ref|XP_016095167.1| PREDICTED: von Willebrand factor A domain-containing protein 7-like [Sinocyclocheilus grahami]	_	_
	CI01000052_01775176_01778348	-8.79068	1.29991	2.57e-07	1.03e-05		gi|148524794|dbj|BAF63404.1| cone transducin alpha subunit [Cyprinus carpio]<>gi|966670597|gb|KTG03978.1| hypothetical protein cypCar_00020647 [Cyprinus carpio]	K04631	_
	CI01000330_03888075_03898310	-3.75045	9.10695	2.65e-07	1.06e-05		gi|1020405777|ref|XP_016115313.1| PREDICTED: circadian-associated transcriptional repressor-like [Sinocyclocheilus grahami]<>gi|1020405779|ref|XP_016115320.1| PREDICTED: circadian-associated transcriptional repressor-like [Sinocyclocheilus grahami]	_	_
	CI01000016_02817855_02829699	-3.79209	6.51476	2.67e-07	1.07e-05		gi|1020436547|ref|XP_016132095.1| PREDICTED: thyroid hormone receptor-associated protein 3-like isoform X3 [Sinocyclocheilus grahami]	_	_
	CI01000069_03854857_03870627	-4.14405	3.54977	2.7e-07	1.08e-05		gi|1025092956|ref|XP_016343296.1| PREDICTED: proline-rich protein 12-like [Sinocyclocheilus anshuiensis]	_	_
	CI01000008_02280309_02281220	-4.34995	3.12433	2.7e-07	1.08e-05			_	_
	CI01000113_02491883_02493061	-3.75805	8.09165	2.74e-07	1.09e-05		gi|1024965676|ref|XP_016304042.1| PREDICTED: nuclear factor interleukin-3-regulated protein-like [Sinocyclocheilus anshuiensis]	_	_
	CI01000012_12521676_12524692	-4.17237	3.47217	2.74e-07	1.09e-05		gi|1025333774|ref|XP_016390225.1| PREDICTED: sperm flagellar protein 1-like [Sinocyclocheilus rhinocerous]	_	_
	CI01000000_12973944_12984087	-4.11423	3.61894	2.74e-07	1.09e-05		gi|688585902|ref|XP_009289482.1| PREDICTED: transcription factor COE1 isoform X1 [Danio rerio]	K09103	_
	CI01000314_01398459_01474471	-3.92004	4.71719	2.76e-07	1.1e-05		gi|1025350792|ref|XP_016394787.1| PREDICTED: T-lymphoma invasion and metastasis-inducing protein 2-like isoform X3 [Sinocyclocheilus rhinocerous]	K16847	_
	CI01000049_00139220_00150293	-3.73928	9.26713	2.83e-07	1.12e-05		gi|973191989|ref|XP_015219570.1| PREDICTED: glycerol kinase [Lepisosteus oculatus]	K00864	_
	CI01000310_02562834_02569144	-5.89433	1.65809	2.84e-07	1.13e-05		gi|966649512|gb|KTF84422.1| hypothetical protein cypCar_00008845 [Cyprinus carpio]	_	_
	CI01000190_01343151_01349849	4.90625	2.30335	2.86e-07	1.14e-05		gi|966714503|gb|KTG46741.1| hypothetical protein cypCar_00015195 [Cyprinus carpio]	K10343	biological_process:intracellular signal transduction(GO:0035556)
	CI01064543_00000646_00001629	4.02106	3.72622	2.9e-07	1.15e-05		gi|1025033812|ref|XP_016325691.1| PREDICTED: prostate stem cell antigen-like [Sinocyclocheilus anshuiensis]	_	_
	CI01000340_09649643_09655912	5.44587	1.88373	2.91e-07	1.15e-05		gi|1020417093|ref|XP_016127447.1| PREDICTED: FYVE, RhoGEF and PH domain-containing protein 5-like [Sinocyclocheilus grahami]	_	_
	CI01000092_03551674_03573437	-3.76003	7.16365	2.92e-07	1.15e-05		gi|1025407794|ref|XP_016409757.1| PREDICTED: ras and Rab interactor 2-like isoform X1 [Sinocyclocheilus rhinocerous]	_	_
	CI01000055_05338403_05341971	8.77767	1.2133	2.97e-07	1.17e-05		gi|1024981137|ref|XP_016312227.1| PREDICTED: kit ligand-like [Sinocyclocheilus anshuiensis]	K05461	_
	CI01000113_00907179_00957938	8.77767	1.2133	2.97e-07	1.17e-05		gi|1025216781|ref|XP_016430266.1| PREDICTED: collagen alpha-1(XI) chain-like [Sinocyclocheilus rhinocerous]	K06236	_
	CI01154414_00002179_00003861	8.77767	1.2133	2.97e-07	1.17e-05		gi|1020597379|ref|XP_016117364.1| PREDICTED: E3 ubiquitin-protein ligase RNF19B-like [Sinocyclocheilus grahami]	_	_
	CI01000024_04713262_04732736	-3.73706	8.64646	3.01e-07	1.18e-05		gi|1024966684|ref|XP_016304585.1| PREDICTED: myosin-9-like [Sinocyclocheilus anshuiensis]	K10352	_
	CI01000092_03271224_03274775	-4.90617	2.14589	3.05e-07	1.2e-05		gi|597740402|ref|XP_007232359.1| PREDICTED: Down syndrome cell adhesion molecule-like [Astyanax mexicanus]	K06767	_
	CI01000001_13378656_13384362	-4.47256	2.89076	3.07e-07	1.2e-05			_	_
	CI01000000_01489740_01508942	3.80274	5.57927	3.08e-07	1.21e-05		gi|1025149646|ref|XP_016416289.1| PREDICTED: TBC1 domain family member 2A-like isoform X1 [Sinocyclocheilus rhinocerous]	_	_
	CI01000001_12058281_12060612	3.73432	7.87816	3.15e-07	1.23e-05		gi|1025249014|ref|XP_016368645.1| PREDICTED: tumor necrosis factor receptor superfamily member 9-like isoform X1 [Sinocyclocheilus rhinocerous]	_	_
	CI01000027_07561011_07562818	-3.91223	4.63075	3.17e-07	1.24e-05		gi|966668876|gb|KTG02257.1| hypothetical protein cypCar_00004478 [Cyprinus carpio]	_	_
	CI01000229_00293752_00293963	3.88677	4.48009	3.18e-07	1.24e-05		gi|82088332|sp|Q6SXP0.1|CI016_CTEID RecName: Full=UPF0184 protein C9orf16 homolog [Ctenopharyngodon idella]<>gi|46361698|gb|AAS89344.1| similar to C9 orf16 [Ctenopharyngodon idella]	_	_
	CI01000119_02615353_02618837	-5.87526	1.64047	3.19e-07	1.24e-05		gi|1025039101|ref|XP_016327117.1| PREDICTED: epithelial membrane protein 2-like isoform X1 [Sinocyclocheilus anshuiensis]	_	_
	CI01000006_08557710_08600107	-3.85553	4.90439	3.19e-07	1.24e-05		gi|688605353|ref|XP_009293636.1| PREDICTED: guanine nucleotide exchange factor VAV2 isoform X8 [Danio rerio]	K05730	_
	CI01000012_04722087_04836261	-3.75201	6.75492	3.22e-07	1.25e-05		gi|1024922145|ref|XP_016335138.1| PREDICTED: nesprin-2-like [Sinocyclocheilus anshuiensis]	_	_
	CI01000306_00571360_00574170	-3.76121	6.47582	3.24e-07	1.26e-05		gi|1025356916|ref|XP_016391960.1| PREDICTED: LOW QUALITY PROTEIN: thymidine kinase, cytosolic-like [Sinocyclocheilus rhinocerous]	K00857	biological_process:DNA replication(GO:0006260);molecular_function:thymidine kinase activity(GO:0004797);biological_process:phosphorylation(GO:0016310);molecular_function:ATP binding(GO:0005524)
	CI01000398_00022693_00027312	-4.38287	2.99171	3.3e-07	1.28e-05		gi|51559415|gb|AAU06726.1| immunoglobulin zeta heavy chain [Danio rerio]	_	_
	CI01000300_00676223_00681470	3.78843	5.5998	3.37e-07	1.3e-05		gi|1020460764|ref|XP_016135153.1| PREDICTED: suppressor of cytokine signaling 1-like [Sinocyclocheilus grahami]	_	biological_process:intracellular signal transduction(GO:0035556)
	CI01000003_00719773_00720087	3.97414	3.88165	3.38e-07	1.31e-05		gi|1025232144|ref|XP_016364047.1| PREDICTED: uncharacterized protein NCBP2-AS2-like [Sinocyclocheilus rhinocerous]	_	_
	CI01000352_00558495_00562831	-8.74104	1.25417	3.45e-07	1.33e-05		gi|1025034344|ref|XP_016325846.1| PREDICTED: heat shock cognate 71 kDa protein-like isoform X1 [Sinocyclocheilus anshuiensis]	K03283	molecular_function:ATP binding(GO:0005524)
	CI01000000_12960402_12973367	-8.71557	1.23073	3.45e-07	1.33e-05			_	_
	CI01000016_03942653_03949757	4.33435	2.72417	3.5e-07	1.35e-05		gi|1024942826|ref|XP_016360588.1| PREDICTED: uncharacterized protein LOC107702704 [Sinocyclocheilus anshuiensis]	_	_
	CI01000016_03082653_03084658	4.55308	2.27657	3.57e-07	1.37e-05		gi|587655612|gb|AHK09951.1| coagulation factor VIII [Ctenopharyngodon idella]	_	_
	CI01000008_02426713_02440284	-3.9471	4.18498	3.58e-07	1.37e-05		gi|966656902|gb|KTF91756.1| hypothetical protein cypCar_00039105 [Cyprinus carpio]	K00318	_
	CI01000092_05003845_05017069	6.04131	1.56592	3.58e-07	1.37e-05		gi|962018612|ref|XP_014833189.1| PREDICTED: uncharacterized protein LOC106910967 [Poecilia mexicana]	_	_
	CI01000308_01132580_01134190	-4.29476	3.07306	3.66e-07	1.4e-05		gi|1025160513|ref|XP_016355899.1| PREDICTED: fukutin-related protein-like [Sinocyclocheilus anshuiensis]	_	biological_process:vasculogenesis(GO:0001570);biological_process:regulation of protein glycosylation(GO:0060049);biological_process:muscle fiber development(GO:0048747);biological_process:striated muscle tissue development(GO:0014706);biological_process:extracellular matrix organization(GO:0030198)
	CI01000105_01104888_01119177	-3.71968	7.34446	3.67e-07	1.4e-05		gi|1025252083|ref|XP_016369469.1| PREDICTED: endophilin-A3-like isoform X1 [Sinocyclocheilus rhinocerous]	K11247	_
	CI01000344_01921180_01925008	3.70936	7.9359	3.69e-07	1.41e-05		gi|1025391034|ref|XP_016405230.1| PREDICTED: uncharacterized protein LOC107738066 [Sinocyclocheilus rhinocerous]	_	_
	CI01000154_01327192_01327848	3.90857	4.3793	3.72e-07	1.42e-05		gi|1020410719|ref|XP_016124011.1| PREDICTED: 14-3-3 protein gamma-B [Sinocyclocheilus grahami]<>gi|1025004068|ref|XP_016321073.1| PREDICTED: 14-3-3 protein gamma-B-like [Sinocyclocheilus anshuiensis]<>gi|1025191238|ref|XP_016423822.1| PREDICTED: 14-3-3 protein gamma-B [Sinocyclocheilus rhinocerous]<>gi|1025223892|ref|XP_016431933.1| PREDICTED: 14-3-3 protein gamma-B [Sinocyclocheilus rhinocerous]…	K16198	molecular_function:protein domain specific binding(GO:0019904)
	CI01000339_04734544_04737942	-4.15307	3.34225	3.72e-07	1.42e-05			_	_
	CI01000304_17584110_17585466	-3.72964	6.79992	3.73e-07	1.42e-05		gi|28279681|gb|AAH45917.1| High-mobility group box 1 [Danio rerio]<>gi|182891806|gb|AAI65307.1| Hmgb1 protein [Danio rerio]	K10802	biological_process:response to cold(GO:0009409);molecular_function:DNA binding(GO:0003677);cellular_component:plasma membrane(GO:0005886);biological_process:forebrain development(GO:0030900);cellular_component:nucleus(GO:0005634)
	CI01000040_00554753_00561571	3.72861	6.75942	3.76e-07	1.43e-05		gi|528514544|ref|XP_005170345.1| PREDICTED: SH3 and PX domain-containing protein 2B isoform X1 [Danio rerio]	_	_
	CI01000233_00188705_00190167	3.85444	4.48816	3.83e-07	1.46e-05		gi|1020599094|ref|XP_016117683.1| PREDICTED: tumor necrosis factor receptor superfamily member 11B-like [Sinocyclocheilus grahami]	_	_
	CI01000129_00482387_00491783	4.53929	2.26363	3.85e-07	1.46e-05		gi|1025230228|ref|XP_016432080.1| PREDICTED: protein-glutamine gamma-glutamyltransferase K-like [Sinocyclocheilus rhinocerous]	K05619	_
	CI01000070_01221859_01224836	5.3915	1.83218	3.89e-07	1.48e-05		gi|1020514564|ref|XP_016096516.1| PREDICTED: phospholipid scramblase 1-like isoform X1 [Sinocyclocheilus grahami]	_	_
	CI01000054_11209592_11214961	-3.68481	10.0164	3.89e-07	1.48e-05		gi|974116195|ref|XP_015257546.1| PREDICTED: serine/threonine-protein kinase Sgk1-like isoform X1 [Cyprinodon variegatus]<>gi|974116197|ref|XP_015257548.1| PREDICTED: serine/threonine-protein kinase Sgk1-like isoform X1 [Cyprinodon variegatus]	K13302	_
	CI01000006_06136379_06136891	4.31405	2.70512	3.92e-07	1.48e-05		gi|1020499991|ref|XP_016088751.1| PREDICTED: uncharacterized protein LOC107551599 [Sinocyclocheilus grahami]	_	_
	CI01000110_02316009_02320829	-8.68963	1.20691	4e-07	1.51e-05		gi|966704062|gb|KTG36303.1| hypothetical protein cypCar_00005698 [Cyprinus carpio]	_	_
	CI01000027_04725469_04727486	6.01899	1.54477	4.03e-07	1.52e-05		gi|1020397673|ref|XP_016140757.1| PREDICTED: ephrin-A1-like [Sinocyclocheilus grahami]	K05462	_
	CI01000311_00233188_00240845	-5.81647	1.58627	4.03e-07	1.52e-05		gi|1025084303|ref|XP_016340925.1| PREDICTED: glioma tumor suppressor candidate region gene 1 protein-like [Sinocyclocheilus anshuiensis]	_	_
	CI01000054_02486241_02489469	-3.86595	4.41513	4.05e-07	1.53e-05		gi|1025359167|ref|XP_016398266.1| PREDICTED: neurabin-1-like isoform X1 [Sinocyclocheilus rhinocerous]<>gi|1025359171|ref|XP_016398275.1| PREDICTED: neurabin-1-like isoform X2 [Sinocyclocheilus rhinocerous]<>gi|1025359175|ref|XP_016398284.1| PREDICTED: neurabin-1-like isoform X1 [Sinocyclocheilus rhinocerous]<>gi|1025359179|ref|XP_016398290.1| PREDICTED: neurabin-1-like isoform X1 [Sinocyclocheil…	K17551	_
	CI01180000_06762114_06762590	3.71046	6.79214	4.06e-07	1.53e-05		gi|1040661015|ref|XP_017214261.1| PREDICTED: brain creatine kinase isoform X2 [Danio rerio]	K00933	molecular_function:transferase activity, transferring phosphorus-containing groups(GO:0016772);molecular_function:nucleotide binding(GO:0000166)
	CI01000069_03835903_03837843	-4.51325	2.71682	4.14e-07	1.56e-05		gi|1024962879|ref|XP_016302550.1| PREDICTED: dual specificity protein phosphatase 16-like [Sinocyclocheilus anshuiensis]	_	_
	CI01000344_02756871_02861561	-4.01014	3.85524	4.26e-07	1.6e-05		gi|1025181922|ref|XP_016421787.1| PREDICTED: neuroligin-2-like [Sinocyclocheilus rhinocerous]	K07378	biological_process:cell adhesion(GO:0007155);cellular_component:membrane(GO:0016020)
	CI01000315_00270327_00272251	4.42742	2.41063	4.28e-07	1.6e-05		gi|1020524221|ref|XP_016101628.1| PREDICTED: cilia- and flagella-associated protein 99-like [Sinocyclocheilus grahami]	_	_
	CI01000055_00988065_01021037	3.76229	5.39768	4.37e-07	1.64e-05		gi|909784838|ref|XP_013160982.1| PREDICTED: protein quaking isoform X5 [Falco peregrinus]	K14945	_
	CI01000063_00839103_00843726	4.05331	3.52506	4.39e-07	1.64e-05		gi|742095184|ref|XP_010863143.1| PREDICTED: actin, aortic smooth muscle [Esox lucius]<>gi|1020414595|ref|XP_016126105.1| PREDICTED: actin, aortic smooth muscle [Sinocyclocheilus grahami]<>gi|1025228688|ref|XP_016431660.1| PREDICTED: actin, aortic smooth muscle [Sinocyclocheilus rhinocerous]<>gi|49901223|gb|AAH75896.1| Actin, alpha 2, smooth muscle, aorta [Danio rerio]<>gi|224712554|gb|ACN61632.1|…	K12313	_
	CI01000049_01887038_01898993	3.7585	5.25523	4.47e-07	1.67e-05		gi|1025392823|ref|XP_016405725.1| PREDICTED: arsenite methyltransferase-like [Sinocyclocheilus rhinocerous]	K07755	molecular_function:arsenite methyltransferase activity(GO:0030791);cellular_component:cytosol(GO:0005829)
	CI01000009_01219880_01224537	-3.86482	4.503	4.59e-07	1.71e-05		gi|938056009|gb|KPP60830.1| hypothetical protein Z043_121135, partial [Scleropages formosus]	_	_
	CI01000013_05508865_05515065	-3.83411	4.43081	4.64e-07	1.73e-05		gi|1025394133|ref|XP_016406068.1| PREDICTED: cholesteryl ester transfer protein isoform X1 [Sinocyclocheilus rhinocerous]	K16835	molecular_function:cholesterol transporter activity(GO:0017127);biological_process:reverse cholesterol transport(GO:0043691);cellular_component:high-density lipoprotein particle(GO:0034364);molecular_function:lipid binding(GO:0008289)
	CI01000027_05413809_05434967	-3.83411	4.43081	4.64e-07	1.73e-05		gi|1025276767|ref|XP_016376162.1| PREDICTED: FXYD domain-containing ion transport regulator 6-like [Sinocyclocheilus rhinocerous]<>gi|1025276773|ref|XP_016376163.1| PREDICTED: FXYD domain-containing ion transport regulator 6-like [Sinocyclocheilus rhinocerous]	_	_
	CI01000304_16816039_16828777	8.69042	1.13083	4.66e-07	1.73e-05		gi|1020396232|ref|XP_016132986.1| PREDICTED: receptor-interacting serine/threonine-protein kinase 4-like isoform X1 [Sinocyclocheilus grahami]	K08848	_
	CI01000158_00335340_00336533	-8.66322	1.18267	4.66e-07	1.73e-05		gi|1020412785|ref|XP_016125128.1| PREDICTED: beta-2 adrenergic receptor-like [Sinocyclocheilus grahami]	K04142	_
	CI01000325_03538609_03541055	3.67844	7.21823	4.66e-07	1.73e-05		gi|966709748|gb|KTG41986.1| hypothetical protein cypCar_00031987, partial [Cyprinus carpio]	_	_
	CI01000070_02016971_02021321	-3.65715	8.94951	4.76e-07	1.77e-05		gi|1025082245|ref|XP_016340364.1| PREDICTED: Krueppel-like factor 6 [Sinocyclocheilus anshuiensis]	K09207	biological_process:pancreas development(GO:0031016);cellular_component:intracellular(GO:0005622);molecular_function:enhancer sequence-specific DNA binding(GO:0001158);biological_process:liver development(GO:0001889);biological_process:optic nerve formation(GO:0021634);biological_process:organ growth(GO:0035265);molecular_function:zinc ion binding(GO:0008270);biological_process:digestive tract dev…
	CI01000213_00415079_00445017	-3.71595	5.92151	4.77e-07	1.77e-05		gi|1025377094|ref|XP_016399451.1| PREDICTED: calcium/calmodulin-dependent protein kinase type II delta 1 chain isoform X3 [Sinocyclocheilus rhinocerous]	K04515	_
	CI01000365_00230779_00243664	-4.31439	2.92819	4.84e-07	1.79e-05		gi|1025094816|ref|XP_016343802.1| PREDICTED: integrin alpha-M-like [Sinocyclocheilus anshuiensis]	_	_
	CI01000129_00988343_00994247	-4.39063	2.81471	4.88e-07	1.8e-05		gi|1025006845|ref|XP_016322158.1| PREDICTED: FH2 domain-containing protein 1-like isoform X2 [Sinocyclocheilus anshuiensis]	_	_
	CI01024400_00001444_00009622	-4.19301	3.1251	4.95e-07	1.83e-05		gi|1025000744|ref|XP_016319303.1| PREDICTED: phosphatidylinositol 4-kinase alpha-like [Sinocyclocheilus anshuiensis]	K00888	_
	CI01000006_06803516_06806038	3.71069	5.73009	4.97e-07	1.83e-05		gi|1025060292|ref|XP_016332866.1| PREDICTED: carbonyl reductase [NADPH] 1-like [Sinocyclocheilus anshuiensis]	K00079	biological_process:metabolic process(GO:0008152);molecular_function:oxidoreductase activity(GO:0016491);molecular_function:nucleotide binding(GO:0000166)
	CI01000029_02750295_02751549	3.73955	5.25831	5.01e-07	1.84e-05		gi|1025344130|ref|XP_016392979.1| PREDICTED: gap junction Cx32.2 protein-like [Sinocyclocheilus rhinocerous]	_	_
	CI01000112_02425312_02445848	-3.68606	6.50532	5.07e-07	1.86e-05		gi|1025295311|ref|XP_016379721.1| PREDICTED: transmembrane channel-like protein 6, partial [Sinocyclocheilus rhinocerous]	_	_
	CI01000006_11429439_11432136	-4.80868	2.05597	5.08e-07	1.87e-05		gi|1025105637|ref|XP_016346731.1| PREDICTED: neural proliferation differentiation and control protein 1-like isoform X2 [Sinocyclocheilus anshuiensis]	_	_
	CI01012525_00000065_00000439	-3.66808	7.06557	5.1e-07	1.87e-05		gi|323146385|gb|ADX32514.1| heat shock 70 kDa protein [Ctenopharyngodon idella]	K03283	_
	CI01000009_11660386_11668299	5.97327	1.50153	5.12e-07	1.88e-05		gi|1025275022|ref|XP_016375671.1| PREDICTED: GDP-fucose protein O-fucosyltransferase 2-like isoform X1 [Sinocyclocheilus rhinocerous]	K03691	molecular_function:transferase activity, transferring glycosyl groups(GO:0016757)
	CI01000119_01772540_01773244	-5.7759	1.54895	5.12e-07	1.88e-05		gi|1025038722|ref|XP_016327013.1| PREDICTED: ADP-ribosylation factor-like protein 11 [Sinocyclocheilus anshuiensis]	_	_
	CI01000027_01204940_01206121	3.64503	8.45886	5.18e-07	1.89e-05		gi|1025339777|ref|XP_016391814.1| PREDICTED: uncharacterized protein LOC107726664 [Sinocyclocheilus rhinocerous]<>gi|1025339781|ref|XP_016391815.1| PREDICTED: uncharacterized protein LOC107726664 [Sinocyclocheilus rhinocerous]	_	_
	CI01000050_00362015_00370409	-3.67547	6.57024	5.18e-07	1.89e-05		gi|1020532698|ref|XP_016106110.1| PREDICTED: transmembrane and coiled-coil domains protein 1-like isoform X3 [Sinocyclocheilus grahami]	_	_
	CI01000303_00346678_00347501	3.87861	4.02152	5.25e-07	1.91e-05		gi|966673478|gb|KTG06859.1| hypothetical protein cypCar_00035663 [Cyprinus carpio]	_	_
	CI01000026_04971470_04972391	3.71348	5.51332	5.25e-07	1.91e-05		gi|1025180548|ref|XP_016421402.1| PREDICTED: transmembrane emp24 domain-containing protein 3-like [Sinocyclocheilus rhinocerous]	K14825	_
	CI01000097_00359081_00360290	3.80763	4.32678	5.27e-07	1.92e-05		gi|1020463781|ref|XP_016136760.1| PREDICTED: probable thiopurine S-methyltransferase isoform X1 [Sinocyclocheilus grahami]	K00569	_
	CI01000006_01164852_01247197	-3.75496	5.07703	5.36e-07	1.95e-05		gi|1025214193|ref|XP_016429584.1| PREDICTED: teneurin-2-like isoform X1 [Sinocyclocheilus rhinocerous]	_	_
	CI01000000_17644414_17655141	3.79943	4.43696	5.39e-07	1.96e-05		gi|1020479467|ref|XP_016145135.1| PREDICTED: cytoplasmic polyadenylation element-binding protein 4 isoform X2 [Sinocyclocheilus grahami]	K02602	_
	CI01000005_00278622_00282152	-8.63632	1.15802	5.43e-07	1.97e-05		gi|1020554662|ref|XP_016110389.1| PREDICTED: microcephalin-like [Sinocyclocheilus grahami]	K19403	_
	CI01000029_03534096_03563671	4.262	2.65637	5.5e-07	2e-05		gi|1025116839|ref|XP_016411964.1| PREDICTED: discoidin, CUB and LCCL domain-containing protein 1-like isoform X4 [Sinocyclocheilus rhinocerous]	_	_
	CI01000186_00295882_00296578	-3.63502	8.53603	5.52e-07	2e-05		gi|1025001933|ref|XP_016319934.1| PREDICTED: protein BTG2-like isoform X1 [Sinocyclocheilus anshuiensis]	_	_
	CI01000353_01581811_01636404	4.99427	1.99592	5.55e-07	2e-05		gi|1025091810|ref|XP_016342976.1| PREDICTED: dedicator of cytokinesis protein 9-like isoform X1 [Sinocyclocheilus anshuiensis]	_	_
	CI01050414_00000270_00000618	4.99427	1.99592	5.55e-07	2e-05		gi|966636780|gb|KTF71884.1| hypothetical protein cypCar_00026541 [Cyprinus carpio]	_	_
	CI01000304_16754929_16761111	3.71852	5.4308	5.65e-07	2.04e-05		gi|1025386180|ref|XP_016401897.1| PREDICTED: dolichyl-phosphate beta-glucosyltransferase [Sinocyclocheilus rhinocerous]	K00729	molecular_function:transferase activity, transferring glycosyl groups(GO:0016757)
	CI01180000_06854398_06859861	3.63675	7.67695	5.69e-07	2.05e-05		gi|1025247123|ref|XP_016368127.1| PREDICTED: tumor necrosis factor alpha-induced protein 2-like [Sinocyclocheilus rhinocerous]	_	_
	CI01000019_05044759_05045945	5.94985	1.47942	5.79e-07	2.08e-05		gi|966645393|gb|KTF80305.1| hypothetical protein cypCar_00039984, partial [Cyprinus carpio]	_	_
	CI01000040_06323496_06341244	-5.11576	1.80911	5.82e-07	2.09e-05		gi|1025375783|ref|XP_016399096.1| PREDICTED: histone-lysine N-methyltransferase, H3 lysine-36 and H4 lysine-20 specific-like [Sinocyclocheilus rhinocerous]	_	_
	CI01000116_00811417_00813218	-3.64552	6.88161	5.89e-07	2.12e-05		gi|148229357|ref|NP_001082996.1| putative P2Y purinoceptor 10 [Danio rerio]<>gi|126631630|gb|AAI34132.1| Zgc:162893 protein [Danio rerio]	K04274	molecular_function:G-protein coupled purinergic nucleotide receptor activity(GO:0045028);cellular_component:integral component of membrane(GO:0016021);biological_process:G-protein coupled purinergic nucleotide receptor signaling pathway(GO:0035589)
	CI01000029_01293143_01293964	3.77066	4.71505	5.91e-07	2.12e-05		gi|1020517634|ref|XP_016098124.1| PREDICTED: basic leucine zipper transcriptional factor ATF-like 3 [Sinocyclocheilus grahami]<>gi|1025289051|ref|XP_016378490.1| PREDICTED: basic leucine zipper transcriptional factor ATF-like 3 [Sinocyclocheilus rhinocerous]	K09034	molecular_function:sequence-specific DNA binding transcription factor activity(GO:0003700);molecular_function:sequence-specific DNA binding(GO:0043565);cellular_component:nucleus(GO:0005634);biological_process:regulation of transcription, DNA-templated(GO:0006355)
	CI01000189_03794645_03856786	-3.63471	7.36108	6e-07	2.15e-05		gi|1025293348|ref|XP_016379182.1| PREDICTED: ankyrin-3-like [Sinocyclocheilus rhinocerous]	K10380	_
	CI01000054_08149724_08152046	-3.76062	4.91063	6.05e-07	2.17e-05		gi|1025101627|ref|XP_016345644.1| PREDICTED: protein L-Myc-1b [Sinocyclocheilus anshuiensis]	K09110	molecular_function:sequence-specific DNA binding transcription factor activity(GO:0003700);molecular_function:DNA binding(GO:0003677);molecular_function:protein dimerization activity(GO:0046983);cellular_component:nucleus(GO:0005634);biological_process:regulation of transcription, DNA-templated(GO:0006355)
	CI01000030_10705288_10715416	-3.65369	6.58605	6.06e-07	2.17e-05		gi|1025300107|ref|XP_016381032.1| PREDICTED: gamma-glutamyl hydrolase-like [Sinocyclocheilus rhinocerous]	K01307	_
	CI01000072_03173455_03175888	4.04938	3.2458	6.09e-07	2.18e-05		gi|1025299183|ref|XP_016380775.1| PREDICTED: cdc42 effector protein 2-like [Sinocyclocheilus rhinocerous]<>gi|1025299186|ref|XP_016380776.1| PREDICTED: cdc42 effector protein 2-like [Sinocyclocheilus rhinocerous]	_	_
	CI01000055_05886107_05906704	3.65072	6.58262	6.11e-07	2.18e-05		gi|1025052430|ref|XP_016330711.1| PREDICTED: lactadherin-like isoform X1 [Sinocyclocheilus anshuiensis]	K17253	_
	CI01000081_01241322_01259737	-3.64717	6.54407	6.14e-07	2.19e-05		gi|1024967666|ref|XP_016305108.1| PREDICTED: integrin alpha-X-like isoform X1 [Sinocyclocheilus anshuiensis]	_	_
	CI01000306_09536090_09548281	-3.97294	3.48816	6.3e-07	2.24e-05		gi|1025186132|ref|XP_016422341.1| PREDICTED: serine/threonine-protein kinase WNK2-like isoform X1 [Sinocyclocheilus rhinocerous]	K08867	_
	CI01000158_01116779_01131501	8.62917	1.07314	6.35e-07	2.26e-05		gi|966661907|gb|KTF96435.1| hypothetical protein cypCar_00028430 [Cyprinus carpio]	K01067	_
	CI01000009_15975897_15978506	-8.60891	1.13293	6.35e-07	2.26e-05		gi|966658223|gb|KTF93077.1| hypothetical protein cypCar_00007595 [Cyprinus carpio]	_	biological_process:endocrine pancreas development(GO:0031018);biological_process:retinol metabolic process(GO:0042572);biological_process:retinal metabolic process(GO:0042574);biological_process:exocrine pancreas development(GO:0031017);biological_process:embryonic pectoral fin morphogenesis(GO:0035118);molecular_function:retinol dehydrogenase activity(GO:0004745);biological_process:skeletal syst…
	CI01000340_09064514_09065350	-8.60891	1.13293	6.35e-07	2.26e-05		gi|1025259455|ref|XP_016371464.1| PREDICTED: putative fidgetin-like protein 2 [Sinocyclocheilus rhinocerous]	_	_
	CI01000004_03361436_03375825	-3.60091	10.6883	6.41e-07	2.27e-05		gi|1020446131|ref|XP_016132632.1| PREDICTED: adseverin-like [Sinocyclocheilus grahami]	K05768	_
	CI01000340_09833384_09843244	-4.1446	3.08036	6.42e-07	2.28e-05		gi|160332465|dbj|BAF93223.1| myosin heavy chain fast skeletal type 2 [Hypophthalmichthys molitrix]	K10352	_
	CI01000098_02974320_02985981	-5.09851	1.79326	6.45e-07	2.28e-05		gi|966685847|gb|KTG18822.1| hypothetical protein cypCar_00017302 [Cyprinus carpio]	K07430	_
	CI01000005_01587815_01629740	-3.87238	3.99772	6.46e-07	2.29e-05		gi|1025203780|ref|XP_016426831.1| PREDICTED: cAMP and cAMP-inhibited cGMP 3',5'-cyclic phosphodiesterase 10A-like isoform X1 [Sinocyclocheilus rhinocerous]	K18438	_
	CI01000139_00198607_00207873	4.36335	2.35068	6.48e-07	2.29e-05		gi|1025007194|ref|XP_016322257.1| PREDICTED: DEP domain-containing protein 7-like [Sinocyclocheilus anshuiensis]	_	_
	CI01000002_00488351_00509976	-5.73416	1.51063	6.55e-07	2.31e-05		gi|1025242443|ref|XP_016366847.1| PREDICTED: myosin-binding protein H-like [Sinocyclocheilus rhinocerous]	_	_
	CI01000304_14231227_14261460	-4.43931	2.64832	6.55e-07	2.31e-05		gi|351710104|gb|EHB13023.1| Disks large-like protein 2 [Heterocephalus glaber]	K12075	_
	CI01180000_05869142_05871227	-4.55759	2.50924	6.75e-07	2.38e-05		gi|82238283|sp|Q6UFS5.1|ZN503_DANRE RecName: Full=Zinc finger protein 503; AltName: Full=NocA-like zinc finger protein 2<>gi|34452614|gb|AAQ72694.1| nocA-like zinc-finger protein 2 [Danio rerio]	_	molecular_function:metal ion binding(GO:0046872);biological_process:regulation of RNA biosynthetic process(GO:2001141);biological_process:hindbrain development(GO:0030902);molecular_function:protein binding(GO:0005515);biological_process:transcription, DNA-templated(GO:0006351);biological_process:embryonic camera-type eye morphogenesis(GO:0048596);molecular_function:protein binding transcription …
	CI01000306_08061250_08076179	3.64421	6.07168	6.76e-07	2.38e-05		gi|808871946|gb|KKF21518.1| MAP kinase-activated protein kinase 3 [Larimichthys crocea]	K04444	_
	CI01000340_14114751_14121172	-3.79292	4.47896	6.78e-07	2.38e-05		gi|1025073875|ref|XP_016338055.1| PREDICTED: synaptonemal complex protein 1-like [Sinocyclocheilus anshuiensis]	K19533	_
	CI01000001_13373261_13375516	-3.59058	10.201	6.84e-07	2.4e-05		gi|1025002787|ref|XP_016320382.1| PREDICTED: nuclear receptor subfamily 4 group A member 1-like [Sinocyclocheilus anshuiensis]<>gi|1025002789|ref|XP_016320383.1| PREDICTED: nuclear receptor subfamily 4 group A member 1-like [Sinocyclocheilus anshuiensis]	K04465	_
	CI01000339_01860747_01871902	-3.58907	10.4535	6.89e-07	2.41e-05		gi|966651917|gb|KTF86819.1| hypothetical protein cypCar_00006730 [Cyprinus carpio]	K01897	_
	CI01000343_00208872_00217919	-3.58843	10.6475	6.91e-07	2.42e-05		gi|966715266|gb|KTG47504.1| hypothetical protein cypCar_00037873 [Cyprinus carpio]	K04296	_
	CI01000009_03164135_03169470	-4.18521	2.97169	6.94e-07	2.43e-05		gi|1025161347|ref|XP_016418315.1| PREDICTED: G-protein coupled receptor 161 [Sinocyclocheilus rhinocerous]	K08439	_
	CI01000071_00295772_00298707	3.82639	4.02492	6.95e-07	2.43e-05		gi|1020565770|ref|XP_016112631.1| PREDICTED: allograft inflammatory factor 1-like [Sinocyclocheilus grahami]	K18617	_
	CI01000340_02936853_02939837	-3.5988	7.60664	7.22e-07	2.52e-05		gi|1025193918|ref|XP_016424143.1| PREDICTED: B-cell lymphoma 6 protein homolog isoform X2 [Sinocyclocheilus rhinocerous]	K15618	_
	CI01000112_01120464_01124295	-3.90092	3.5976	7.24e-07	2.52e-05		gi|1025204327|ref|XP_016426967.1| PREDICTED: trinucleotide repeat-containing gene 6C protein-like [Sinocyclocheilus rhinocerous]<>gi|1025204331|ref|XP_016426968.1| PREDICTED: trinucleotide repeat-containing gene 6C protein-like [Sinocyclocheilus rhinocerous]	K18412	_
	CI01000005_00358864_00426242	-4.74987	2.00192	7.25e-07	2.53e-05		gi|1025181778|ref|XP_016421744.1| PREDICTED: microcephalin isoform X1 [Sinocyclocheilus rhinocerous]	K19403	_
	CI01000054_02840361_02849268	-3.84071	4.02873	7.27e-07	2.53e-05		gi|1024934906|ref|XP_016317778.1| PREDICTED: HEPACAM family member 2-like isoform X1 [Sinocyclocheilus anshuiensis]	_	_
	CI01000055_04815417_04830336	-3.70855	4.9792	7.38e-07	2.57e-05		gi|1020480584|ref|XP_016145731.1| PREDICTED: proline-rich protein 5-like [Sinocyclocheilus grahami]<>gi|1020480586|ref|XP_016145732.1| PREDICTED: proline-rich protein 5-like [Sinocyclocheilus grahami]<>gi|1020480588|ref|XP_016145733.1| PREDICTED: proline-rich protein 5-like [Sinocyclocheilus grahami]<>gi|1020480590|ref|XP_016145734.1| PREDICTED: proline-rich protein 5-like [Sinocyclocheilus graha…	_	_
	CI01000012_12490611_12503873	-5.71283	1.49108	7.42e-07	2.57e-05		gi|1025333907|ref|XP_016390257.1| PREDICTED: cilia- and flagella-associated protein 43 [Sinocyclocheilus rhinocerous]	_	_
	CI01000422_00002768_00004635	-5.71283	1.49108	7.42e-07	2.57e-05		gi|1024995508|ref|XP_016317315.1| PREDICTED: piggyBac transposable element-derived protein 4-like [Sinocyclocheilus anshuiensis]	_	_
	CI01000304_09342385_09345935	-8.58097	1.10739	7.45e-07	2.58e-05		gi|966694951|gb|KTG27453.1| hypothetical protein cypCar_00027990 [Cyprinus carpio]	_	_
	CI01000027_02125080_02146147	-3.91716	3.52736	7.46e-07	2.58e-05		gi|1025226200|ref|XP_016369613.1| PREDICTED: neural cell adhesion molecule 1-B-like isoform X4 [Sinocyclocheilus rhinocerous]	_	_
	CI01000050_04591548_04592778	-3.65467	5.46208	7.54e-07	2.61e-05		gi|966702760|gb|KTG35001.1| hypothetical protein cypCar_00015152 [Cyprinus carpio]	_	_
	CI01000129_01012551_01019774	3.61168	6.3386	7.75e-07	2.68e-05		gi|1031986204|ref|NP_001037808.2| procollagen-lysine,2-oxoglutarate 5-dioxygenase 3 precursor [Danio rerio]<>gi|126631809|gb|AAI33840.1| Plod3 protein [Danio rerio]	K13646	biological_process:oxidation-reduction process(GO:0055114);cellular_component:collagen trimer(GO:0005581);biological_process:motor neuron axon guidance(GO:0008045);molecular_function:oxidoreductase activity, acting on single donors with incorporation of molecular oxygen, incorporation of two atoms of oxygen(GO:0016702);molecular_function:procollagen-lysine 5-dioxygenase activity(GO:0008475);molec…
	CI01000115_02270339_02301367	-3.58127	7.96095	7.8e-07	2.69e-05		gi|1025378082|ref|XP_016399707.1| PREDICTED: cat eye syndrome critical region protein 2-like isoform X2 [Sinocyclocheilus rhinocerous]	_	_
	CI01000176_00038075_00047416	-3.56681	9.93477	7.9e-07	2.72e-05		gi|1024973510|ref|XP_016308264.1| PREDICTED: CD97 antigen-like isoform X1 [Sinocyclocheilus anshuiensis]	K08446	_
	CI01000026_02650632_02651292	-5.06338	1.76104	7.95e-07	2.74e-05			_	_
	CI01000015_05933024_05940210	-4.22601	2.84652	7.97e-07	2.74e-05		gi|1024959698|ref|XP_016300841.1| PREDICTED: protein SSUH2 homolog [Sinocyclocheilus anshuiensis]	_	_
	CI01000030_07174087_07174921	-3.82239	4.01183	8.16e-07	2.81e-05		gi|1020466395|ref|XP_016138150.1| PREDICTED: transmembrane and immunoglobulin domain-containing protein 1-like [Sinocyclocheilus grahami]	_	_
	CI01000016_04400456_04412173	-3.58727	7.07819	8.17e-07	2.81e-05		gi|966703841|gb|KTG36082.1| hypothetical protein cypCar_00011416 [Cyprinus carpio]	K01539	_
	CI01000005_02885300_02890664	-4.29479	2.72612	8.36e-07	2.87e-05		gi|966637135|gb|KTF72239.1| hypothetical protein cypCar_00047224, partial [Cyprinus carpio]	K13903	_
	CI01000071_00285166_00287049	4.72143	2.12884	8.38e-07	2.87e-05			_	_
	CI01000092_01270604_01273133	4.72143	2.12884	8.38e-07	2.87e-05		gi|966646956|gb|KTF81866.1| hypothetical protein cypCar_00043935, partial [Cyprinus carpio]	_	_
	CI01000027_06066013_06067182	4.0701	2.92434	8.39e-07	2.87e-05		gi|1024960738|ref|XP_016301397.1| PREDICTED: interferon-inducible GTPase 5-like isoform X2 [Sinocyclocheilus anshuiensis]	_	_
	CI01000013_01029597_01029830	5.87724	1.41102	8.42e-07	2.87e-05			_	_
	CI01180000_07146950_07151404	-3.71063	4.63447	8.54e-07	2.91e-05		gi|1020451955|ref|XP_016133526.1| PREDICTED: core histone macro-H2A.2 [Sinocyclocheilus grahami]<>gi|1020451957|ref|XP_016133527.1| PREDICTED: core histone macro-H2A.2 [Sinocyclocheilus grahami]<>gi|1020451996|ref|XP_016133528.1| PREDICTED: core histone macro-H2A.2 [Sinocyclocheilus grahami]	K11251	cellular_component:nucleosome(GO:0000786);biological_process:nucleosome assembly(GO:0006334);molecular_function:transcription regulatory region DNA binding(GO:0044212);cellular_component:nucleus(GO:0005634);molecular_function:protein heterodimerization activity(GO:0046982)
	CI01180000_06755090_06760583	3.5637	8.13917	8.63e-07	2.94e-05		gi|966653220|gb|KTF88122.1| hypothetical protein cypCar_00025324, partial [Cyprinus carpio]	K00933	_
	CI01000043_07667056_07673079	3.78021	4.08069	8.66e-07	2.95e-05		gi|1025219534|ref|XP_016420254.1| PREDICTED: SLAM family member 9-like, partial [Sinocyclocheilus rhinocerous]	_	_
	CI01000063_00299119_00371545	-3.62892	5.71894	8.7e-07	2.96e-05		gi|1025033279|ref|XP_016325544.1| PREDICTED: supervillin-like [Sinocyclocheilus anshuiensis]	_	_
	CI01000055_06472841_06481094	8.5652	1.0131	8.76e-07	2.97e-05		gi|1020405972|ref|XP_016116208.1| PREDICTED: caldesmon-like [Sinocyclocheilus grahami]	K12327	_
	CI01000105_00261977_00273284	8.5652	1.0131	8.76e-07	2.97e-05			_	_
	CI01000010_09914036_09925541	-8.55248	1.08138	8.76e-07	2.97e-05		gi|1025268637|ref|XP_016373947.1| PREDICTED: cell cycle checkpoint control protein RAD9A-like [Sinocyclocheilus rhinocerous]	K10994	biological_process:DNA damage checkpoint(GO:0000077);cellular_component:checkpoint clamp complex(GO:0030896);biological_process:DNA repair(GO:0006281)
	CI01000027_08064283_08072145	-8.55248	1.08138	8.76e-07	2.97e-05		gi|1025093669|ref|XP_016343490.1| PREDICTED: tropomodulin-4-like isoform X1 [Sinocyclocheilus anshuiensis]	K10370	cellular_component:cytoskeleton(GO:0005856);molecular_function:tropomyosin binding(GO:0005523)
	CI01000001_09824213_09894721	5.23562	1.68509	8.84e-07	2.99e-05		gi|1025283138|ref|XP_016377876.1| PREDICTED: basement membrane-specific heparan sulfate proteoglycan core protein-like [Sinocyclocheilus rhinocerous]	K06255	_
	CI01000034_01842093_01847705	-3.83216	3.89777	9.09e-07	3.07e-05		gi|1020411413|ref|XP_016124391.1| PREDICTED: nuclear receptor subfamily 1 group D member 1-like isoform X1 [Sinocyclocheilus grahami]<>gi|1020411415|ref|XP_016124392.1| PREDICTED: nuclear receptor subfamily 1 group D member 1-like isoform X2 [Sinocyclocheilus grahami]	K03728	biological_process:steroid hormone mediated signaling pathway(GO:0043401);molecular_function:zinc ion binding(GO:0008270);biological_process:regulation of transcription, DNA-templated(GO:0006355);molecular_function:thyroid hormone receptor activity(GO:0004887);molecular_function:sequence-specific DNA binding(GO:0043565);molecular_function:steroid hormone receptor activity(GO:0003707);molecular_fu…
	CI01000081_00332119_00340465	-3.70573	4.59389	9.12e-07	3.08e-05		gi|1024979303|ref|XP_016311242.1| PREDICTED: adenosine receptor A2b-like [Sinocyclocheilus anshuiensis]	K04267	_
	CI01000043_00691551_00693132	-3.54439	9.08238	9.12e-07	3.08e-05		gi|1025349412|ref|XP_016394409.1| PREDICTED: protein phosphatase 1 regulatory subunit 15A-like isoform X1 [Sinocyclocheilus rhinocerous]	_	_
	CI01097140_00000771_00002412	4.0235	3.00365	9.17e-07	3.09e-05		gi|1020549802|ref|XP_016109420.1| PREDICTED: rasGAP-activating-like protein 1 [Sinocyclocheilus grahami]	_	_
	CI01000013_04781357_04784880	-3.57108	7.02031	9.22e-07	3.1e-05		gi|1025003787|ref|XP_016320921.1| PREDICTED: very-long-chain (3R)-3-hydroxyacyl-CoA dehydratase [Sinocyclocheilus anshuiensis]	K10703	_
	CI01000339_07813830_07855935	4.29631	2.28815	9.29e-07	3.12e-05		gi|597797782|ref|XP_007260448.1| PREDICTED: disabled homolog 2-interacting protein isoform X1 [Astyanax mexicanus]	_	_
	CI01000000_01105760_01112812	-3.99269	3.19419	9.41e-07	3.16e-05		gi|1024967266|ref|XP_016304904.1| PREDICTED: mucin-17-like [Sinocyclocheilus anshuiensis]	_	_
	CI01000173_00306872_00319686	-3.83369	3.61619	9.49e-07	3.18e-05		gi|556990495|ref|XP_005999997.1| PREDICTED: hepatic leukemia factor isoform X1 [Latimeria chalumnae]	K09057	_
	CI01000024_07697986_07832289	-3.73956	4.3873	9.63e-07	3.23e-05		gi|1025250211|ref|XP_016368974.1| PREDICTED: receptor-type tyrosine-protein phosphatase F-like isoform X2 [Sinocyclocheilus rhinocerous]	K05695	_
	CI01000637_00000433_00003236	-3.53055	10.7501	9.74e-07	3.26e-05		gi|1025229488|ref|XP_016431877.1| PREDICTED: collagenase 3-like [Sinocyclocheilus rhinocerous]	_	_
	CI01000027_06137526_06155474	-3.67078	4.88726	9.74e-07	3.26e-05		gi|1025324299|ref|XP_016387613.1| PREDICTED: hormone-sensitive lipase-like isoform X2 [Sinocyclocheilus rhinocerous]	K07188	_
	CI01000161_00957654_00987212	-5.02737	1.72806	9.85e-07	3.29e-05		gi|189525905|ref|XP_001919896.1| PREDICTED: alanine aminotransferase 2-like [Danio rerio]<>gi|528495670|ref|XP_005156168.1| PREDICTED: alanine aminotransferase 2-like [Danio rerio]	K00814	_
	CI01000344_01916267_01918847	4.00664	2.98797	1.01e-06	3.35e-05		gi|1024939871|ref|XP_016335116.1| PREDICTED: uncharacterized protein LOC107683551 [Sinocyclocheilus anshuiensis]	_	_
	CI01000020_04220852_04223533	3.60401	5.36039	1.01e-06	3.36e-05		gi|831309999|ref|XP_012687384.1| PREDICTED: calumenin [Clupea harengus]	_	_
	CI01000327_04109517_04120130	3.62015	5.22768	1.01e-06	3.37e-05		gi|1025346865|ref|XP_016393720.1| PREDICTED: PX domain-containing protein 1-like isoform X2 [Sinocyclocheilus rhinocerous]	_	_
	CI01000277_00219921_00228923	-3.70186	4.3089	1.01e-06	3.38e-05		gi|1024997286|ref|XP_016318025.1| PREDICTED: nuclear mitotic apparatus protein 1-like [Sinocyclocheilus anshuiensis]	K16808	_
	CI01000024_04375843_04386015	-3.52474	9.03316	1.03e-06	3.41e-05		gi|1025239181|ref|XP_016365962.1| PREDICTED: RAS protein activator like-3-like isoform X1 [Sinocyclocheilus rhinocerous]	_	_
	CI01000025_00129796_00145019	8.53213	0.982132	1.03e-06	3.41e-05		gi|808865503|gb|KKF16360.1| Wilms tumor protein 1-interacting protein, partial [Larimichthys crocea]	K16682	_
	CI01000028_07470324_07471346	8.53213	0.982132	1.03e-06	3.41e-05		gi|1024950722|ref|XP_016296074.1| PREDICTED: C3a anaphylatoxin chemotactic receptor-like [Sinocyclocheilus anshuiensis]	K04245	_
	CI01000046_04532653_04542785	8.53213	0.982132	1.03e-06	3.41e-05		gi|1025027892|ref|XP_016324086.1| PREDICTED: 1-phosphatidylinositol 4,5-bisphosphate phosphodiesterase delta-3-A-like [Sinocyclocheilus anshuiensis]	_	_
	CI01057984_00000211_00001178	8.53213	0.982132	1.03e-06	3.41e-05		gi|1020462632|ref|XP_016136150.1| PREDICTED: uncharacterized protein LOC107591507 [Sinocyclocheilus grahami]	_	_
	CI01000092_03086245_03088783	-8.52341	1.05489	1.03e-06	3.41e-05		gi|929087025|ref|XP_014054124.1| PREDICTED: uncharacterized protein LOC106604207 [Salmo salar]	_	_
	CI01000012_07537907_07544112	3.89383	3.45759	1.04e-06	3.42e-05		gi|1025232486|ref|XP_016364134.1| PREDICTED: retinol dehydrogenase 11-like [Sinocyclocheilus rhinocerous]	K11153	biological_process:metabolic process(GO:0008152);molecular_function:oxidoreductase activity(GO:0016491);molecular_function:nucleotide binding(GO:0000166)
	CI01000340_09235680_09248928	3.78494	3.64225	1.06e-06	3.49e-05		gi|1024985560|ref|XP_016314543.1| PREDICTED: integrin beta-7-like [Sinocyclocheilus anshuiensis]	_	_
	CI01000301_00851555_00904753	-3.58471	5.88569	1.06e-06	3.5e-05		gi|1025215120|ref|XP_016429838.1| PREDICTED: protein FAM13A-like isoform X1 [Sinocyclocheilus rhinocerous]	_	_
	CI01000059_08334902_08338268	3.67068	4.49486	1.09e-06	3.58e-05		gi|966671293|gb|KTG04674.1| hypothetical protein cypCar_00015477 [Cyprinus carpio]	_	_
	CI01000030_09169745_09175576	-5.64688	1.43075	1.09e-06	3.59e-05		gi|1024924830|ref|XP_016349601.1| PREDICTED: glycerol-3-phosphate dehydrogenase [NAD(+)], cytoplasmic-like [Sinocyclocheilus anshuiensis]	K00006	biological_process:carbohydrate metabolic process(GO:0005975);molecular_function:NAD binding(GO:0051287);molecular_function:glycerol-3-phosphate dehydrogenase [NAD+] activity(GO:0004367);biological_process:glycerol-3-phosphate catabolic process(GO:0046168);cellular_component:glycerol-3-phosphate dehydrogenase complex(GO:0009331);molecular_function:protein homodimerization activity(GO:0042803);bio…
	CI01000051_03431193_03432454	-3.51331	9.41291	1.09e-06	3.59e-05		gi|83267784|gb|ABB99425.1| c-Jun protein [Ctenopharyngodon idella]<>gi|83267788|gb|ABB99427.1| c-Jun protein [Ctenopharyngodon idella]	K04448	_
	CI01000340_16175837_16177624	-3.51142	10.3913	1.09e-06	3.59e-05			_	_
	CI01000113_00496299_00500634	3.67036	4.52753	1.09e-06	3.59e-05		gi|966649942|gb|KTF84852.1| hypothetical protein cypCar_00037817 [Cyprinus carpio]	_	_
	CI01000050_03306831_03324064	5.19387	1.64588	1.1e-06	3.59e-05		gi|1020518867|ref|XP_016098769.1| PREDICTED: fibroblast growth factor receptor 1-A-like [Sinocyclocheilus grahami]	K04362	_
	CI01000053_06182140_06229627	5.19387	1.64588	1.1e-06	3.59e-05		gi|1025348213|ref|XP_016394079.1| PREDICTED: multiple epidermal growth factor-like domains protein 9 [Sinocyclocheilus rhinocerous]	_	_
	CI01000030_02911153_02916952	-3.51211	8.93667	1.11e-06	3.62e-05		gi|938047043|gb|KPP57593.1| basigin-like [Scleropages formosus]	K06535	_
	CI01000057_05664038_05668068	3.57371	5.66047	1.14e-06	3.71e-05		gi|283831540|gb|ADB44208.1| natural resistance-associated macrophage protein [Ctenopharyngodon idella]	K12347	_
	CI01000180_00957453_00969397	-3.57773	5.58989	1.15e-06	3.74e-05		gi|1025227731|ref|XP_016431403.1| PREDICTED: heterogeneous nuclear ribonucleoprotein U-like protein 1 isoform X3 [Sinocyclocheilus rhinocerous]	K15047	_
	CI01000092_03828205_03831437	4.04709	2.76881	1.15e-06	3.74e-05		gi|1025178506|ref|XP_016420859.1| PREDICTED: tyrosine-protein kinase receptor UFO-like [Sinocyclocheilus rhinocerous]	K07370	_
	CI01000321_04204706_04214819	4.87342	1.88221	1.15e-06	3.75e-05		gi|528509347|ref|XP_690165.5| PREDICTED: intermediate filament family orphan 1 [Danio rerio]	_	_
	CI01000213_00522148_00551251	4.65945	2.07065	1.17e-06	3.79e-05		gi|688565619|ref|XP_009301761.1| PREDICTED: cGMP-specific 3',5'-cyclic phosphodiesterase isoform X2 [Danio rerio]	K13762	molecular_function:metal ion binding(GO:0046872);biological_process:signal transduction(GO:0007165);molecular_function:3',5'-cyclic-nucleotide phosphodiesterase activity(GO:0004114)
	CI01000012_07210006_07251043	-4.23969	2.67538	1.17e-06	3.81e-05		gi|1025032965|ref|XP_016325463.1| PREDICTED: protein jagged-2-like [Sinocyclocheilus anshuiensis]	_	_
	CI01000018_04243337_04245807	3.51555	7.11283	1.21e-06	3.93e-05		gi|1025359809|ref|XP_016400068.1| PREDICTED: protein FAM162B-like [Sinocyclocheilus rhinocerous]	_	_
	CI01000368_00192239_00217602	-4.15816	2.78406	1.21e-06	3.93e-05		gi|1024923302|ref|XP_016341315.1| PREDICTED: uncharacterized protein LOC107688212 isoform X1 [Sinocyclocheilus anshuiensis]<>gi|1024923304|ref|XP_016341323.1| PREDICTED: uncharacterized protein LOC107688212 isoform X2 [Sinocyclocheilus anshuiensis]	_	_
	CI01000345_01252071_01253566	3.54504	5.98021	1.22e-06	3.95e-05		gi|1025244866|ref|XP_016367516.1| PREDICTED: transmembrane protein 208 [Sinocyclocheilus rhinocerous]<>gi|1025244870|ref|XP_016367517.1| PREDICTED: transmembrane protein 208 [Sinocyclocheilus rhinocerous]	_	cellular_component:integral component of membrane(GO:0016021)
	CI01000033_00326195_00369841	-8.49374	1.02789	1.22e-06	3.95e-05		gi|657578885|ref|XP_008293335.1| PREDICTED: potassium channel subfamily T member 2-like [Stegastes partitus]	K04947	_
	CI01000321_01789650_01796167	3.56168	5.69071	1.22e-06	3.95e-05		gi|966714216|gb|KTG46454.1| hypothetical protein cypCar_00045945 [Cyprinus carpio]	K08660	molecular_function:metallopeptidase activity(GO:0008237);molecular_function:dipeptidase activity(GO:0016805);biological_process:proteolysis(GO:0006508);molecular_function:tripeptidase activity(GO:0034701)
	CI01000069_02818349_02821933	3.90771	3.21168	1.22e-06	3.95e-05		gi|966667136|gb|KTG00711.1| hypothetical protein cypCar_00015897 [Cyprinus carpio]	K06087	_
	CI01000320_01176457_01181900	-3.67143	4.28098	1.23e-06	3.97e-05		gi|1020497603|ref|XP_016087459.1| PREDICTED: protein 4.1-like [Sinocyclocheilus grahami]	K06107	_
	CI01000139_00827118_00835747	-3.98735	3.06811	1.23e-06	3.98e-05		gi|1025007394|ref|XP_016322315.1| PREDICTED: protein regulator of cytokinesis 1-like isoform X1 [Sinocyclocheilus anshuiensis]	K16732	_
	CI01000004_08847888_08849951	-5.6242	1.41006	1.24e-06	4e-05		gi|1024965838|ref|XP_016304128.1| PREDICTED: contactin-3-like [Sinocyclocheilus anshuiensis]	_	_
	CI01000040_06055205_06060690	-5.6242	1.41006	1.24e-06	4e-05		gi|1020524315|ref|XP_016101673.1| PREDICTED: proline-rich protein 7-like isoform X1 [Sinocyclocheilus grahami]	_	_
	CI01000301_01077165_01081346	-5.6242	1.41006	1.24e-06	4e-05		gi|1025215175|ref|XP_016429852.1| PREDICTED: 3-oxo-5-alpha-steroid 4-dehydrogenase 2-like isoform X1 [Sinocyclocheilus rhinocerous]	K12344	_
	CI01000186_00422121_00422913	-3.54929	5.81115	1.25e-06	4.01e-05		gi|326678021|ref|XP_003200962.1| PREDICTED: cyclin-dependent kinase inhibitor 1 isoform X1 [Danio rerio]	_	biological_process:cell cycle arrest(GO:0007050);biological_process:skeletal muscle cell differentiation(GO:0035914);molecular_function:cyclin-dependent protein serine/threonine kinase inhibitor activity(GO:0004861);cellular_component:nucleus(GO:0005634);biological_process:response to X-ray(GO:0010165)
	CI01000015_05170340_05172275	3.49887	8.10666	1.26e-06	4.04e-05		gi|1020465915|ref|XP_016137895.1| PREDICTED: mesencephalic astrocyte-derived neurotrophic factor-like [Sinocyclocheilus grahami]	_	_
	CI01000312_00612826_00621610	3.73308	3.83258	1.27e-06	4.06e-05		gi|1020400965|ref|XP_016090767.1| PREDICTED: cytosolic phospholipase A2 delta-like [Sinocyclocheilus grahami]	K16342	_
	CI01000090_00228378_00253750	-4.65689	1.91682	1.27e-06	4.06e-05		gi|966701366|gb|KTG33607.1| hypothetical protein cypCar_00032899 [Cyprinus carpio]	_	_
	CI01000089_00639241_00649290	-4.07487	2.87014	1.3e-06	4.17e-05		gi|1020471721|ref|XP_016140996.1| PREDICTED: zinc finger MIZ domain-containing protein 1-like [Sinocyclocheilus grahami]	_	_
	CI01000339_05968915_05972679	3.60187	4.70402	1.31e-06	4.19e-05		gi|1020422953|ref|XP_016130583.1| PREDICTED: UDP-N-acetylglucosamine--dolichyl-phosphate N-acetylglucosaminephosphotransferase-like isoform X2 [Sinocyclocheilus grahami]	K01001	_
	CI01012531_00000804_00001065	4.1585	2.37377	1.31e-06	4.19e-05		gi|1020569107|ref|XP_016113289.1| PREDICTED: uncharacterized protein LOC107571481 [Sinocyclocheilus grahami]	_	_
	CI01000150_00355809_00362668	-3.821	3.43905	1.31e-06	4.19e-05		gi|1025069185|ref|XP_016336764.1| PREDICTED: serine/threonine-protein kinase Sgk2-like [Sinocyclocheilus anshuiensis]	K13303	_
	CI01000338_00374920_00384216	-3.58221	5.20978	1.33e-06	4.25e-05		gi|1025332357|ref|XP_016389828.1| PREDICTED: sushi domain-containing protein 1, partial [Sinocyclocheilus rhinocerous]	_	_
	CI01000009_15981692_15985027	-3.5222	6.3447	1.35e-06	4.28e-05		gi|1025128573|ref|XP_016414134.1| PREDICTED: retinol dehydrogenase 3-like [Sinocyclocheilus rhinocerous]<>gi|1025128579|ref|XP_016414135.1| PREDICTED: retinol dehydrogenase 3-like [Sinocyclocheilus rhinocerous]	_	biological_process:retinal metabolic process(GO:0042574);biological_process:skeletal system development(GO:0001501);biological_process:digestive tract morphogenesis(GO:0048546);biological_process:retinol metabolic process(GO:0042572);biological_process:pectoral fin morphogenesis(GO:0035138);molecular_function:retinol dehydrogenase activity(GO:0004745);biological_process:exocrine pancreas developm…
	CI01000299_00151569_00153623	3.55431	5.34928	1.35e-06	4.28e-05		gi|966644485|gb|KTF79397.1| hypothetical protein cypCar_00035617 [Cyprinus carpio]	K14383	_
	CI01000154_01057020_01083988	3.51412	6.40942	1.36e-06	4.31e-05		gi|1020465527|ref|XP_016137692.1| PREDICTED: rho GTPase-activating protein 35-like [Sinocyclocheilus grahami]	K05732	_
	CI01000027_04419264_04422151	-3.81546	3.43398	1.36e-06	4.31e-05		gi|1020397640|ref|XP_016140610.1| PREDICTED: toll-like receptor 12 isoform X1 [Sinocyclocheilus grahami]<>gi|1020533101|ref|XP_016120510.1| PREDICTED: toll-like receptor 12 isoform X1 [Sinocyclocheilus grahami]	_	_
	CI01000302_00542684_00570843	-3.60513	4.88407	1.37e-06	4.33e-05		gi|1042350625|ref|XP_017319078.1| PREDICTED: type II inositol 3,4-bisphosphate 4-phosphatase isoform X1 [Ictalurus punctatus]	K01109	_
	CI01000024_05295273_05311854	-3.54038	5.85871	1.37e-06	4.33e-05		gi|1025045645|ref|XP_016328909.1| PREDICTED: ras and Rab interactor 2-like [Sinocyclocheilus anshuiensis]	_	_
	CI01000009_09490460_09493598	3.53504	5.89195	1.37e-06	4.33e-05		gi|1025328954|ref|XP_016388885.1| PREDICTED: cis-aconitate decarboxylase-like [Sinocyclocheilus rhinocerous]	K17724	_
	CI01000339_04723905_04731220	-3.58423	5.14403	1.38e-06	4.38e-05		gi|966671510|gb|KTG04891.1| hypothetical protein cypCar_00038260, partial [Cyprinus carpio]	_	_
	CI01000054_02868603_02911589	-3.59359	4.92842	1.39e-06	4.38e-05		gi|966713733|gb|KTG45971.1| hypothetical protein cypCar_00008675 [Cyprinus carpio]	K02091	_
	CI01000046_06989298_06993467	-4.6408	1.90212	1.39e-06	4.39e-05		gi|966644591|gb|KTF79503.1| hypothetical protein cypCar_00005910 [Cyprinus carpio]	K07861	molecular_function:GTP binding(GO:0005525);cellular_component:intracellular(GO:0005622);cellular_component:membrane(GO:0016020);biological_process:small GTPase mediated signal transduction(GO:0007264)
	CI01000119_01655173_01656399	-4.6408	1.90212	1.39e-06	4.39e-05		gi|523704390|ref|NP_001265740.1| leukemia-associated protein 7 [Danio rerio]<>gi|398471429|gb|AFO84714.1| Dleu7 [Danio rerio]	_	_
	CI01000301_01648849_01703249	-4.6408	1.90212	1.39e-06	4.39e-05		gi|1025122077|ref|XP_016349994.1| PREDICTED: nuclear factor 1 X-type-like isoform X1 [Sinocyclocheilus anshuiensis]	K09171	_
	CI01000036_02002492_02003292	-4.21133	2.64932	1.39e-06	4.39e-05		gi|47203587|emb|CAF92714.1| unnamed protein product, partial [Tetraodon nigroviridis]	_	_
	CI01000004_03432787_03433110	-3.56827	5.21884	1.42e-06	4.46e-05			_	_
	CI01000043_05261569_05299427	4.00705	2.73164	1.42e-06	4.46e-05		gi|1025341814|ref|XP_016392354.1| PREDICTED: protein-methionine sulfoxide oxidase MICAL2-like isoform X1 [Sinocyclocheilus rhinocerous]<>gi|1025341818|ref|XP_016392355.1| PREDICTED: protein-methionine sulfoxide oxidase MICAL2-like isoform X1 [Sinocyclocheilus rhinocerous]	_	_
	CI01000006_11452997_11455817	-3.55047	5.34682	1.42e-06	4.46e-05		gi|966700601|gb|KTG32842.1| hypothetical protein cypCar_00006614 [Cyprinus carpio]	K09369	_
	CI01000028_05820436_05825019	3.50337	6.37534	1.44e-06	4.5e-05		gi|1025286449|ref|XP_016371357.1| PREDICTED: vasodilator-stimulated phosphoprotein-like isoform X1 [Sinocyclocheilus rhinocerous]	K06274	_
	CI01000025_00123918_00129618	8.4636	0.918163	1.45e-06	4.52e-05			_	_
	CI01000028_07496320_07497330	8.4636	0.918163	1.45e-06	4.52e-05		gi|1024950722|ref|XP_016296074.1| PREDICTED: C3a anaphylatoxin chemotactic receptor-like [Sinocyclocheilus anshuiensis]	_	_
	CI01000055_06164325_06174472	8.4636	0.918163	1.45e-06	4.52e-05		gi|1025291522|ref|XP_016378687.1| PREDICTED: interferon-induced GTP-binding protein Mx3-like [Sinocyclocheilus rhinocerous]	_	_
	CI01000034_04101415_04114654	-3.52228	5.80052	1.46e-06	4.55e-05		gi|1025221967|ref|XP_016426755.1| PREDICTED: integrin beta-3-like isoform X1 [Sinocyclocheilus rhinocerous]	_	biological_process:platelet aggregation(GO:0070527);cellular_component:integrin complex(GO:0008305);biological_process:angiogenesis involved in wound healing(GO:0060055);biological_process:integrin-mediated signaling pathway(GO:0007229);biological_process:cell-substrate junction assembly(GO:0007044);molecular_function:receptor activity(GO:0004872);biological_process:cell-matrix adhesion(GO:000716…
	CI01000313_01063333_01083888	-3.64777	4.21422	1.46e-06	4.56e-05		gi|1025282561|ref|XP_016377717.1| PREDICTED: multiple inositol polyphosphate phosphatase 1-like [Sinocyclocheilus rhinocerous]	K03103	_
	CI01000000_05535196_05536658	-3.53031	5.83574	1.47e-06	4.57e-05		gi|1025037154|ref|XP_016326574.1| PREDICTED: nocturnin-like [Sinocyclocheilus anshuiensis]	_	_
	CI01000047_01558151_01580512	-3.47506	7.6143	1.48e-06	4.61e-05		gi|1025148577|ref|XP_016416158.1| PREDICTED: ankyrin-3-like [Sinocyclocheilus rhinocerous]	K10380	_
	CI01000049_03790418_03842410	-3.71919	3.91701	1.48e-06	4.62e-05		gi|1025386703|ref|XP_016402035.1| PREDICTED: progesterone-induced-blocking factor 1 [Sinocyclocheilus rhinocerous]	K16538	_
	CI01000020_02444149_02444833	-3.49263	6.60523	1.5e-06	4.67e-05		gi|597792041|ref|XP_007259068.1| PREDICTED: uncharacterized protein LOC103022110 [Astyanax mexicanus]<>gi|597792044|ref|XP_007259069.1| PREDICTED: uncharacterized protein LOC103022110 [Astyanax mexicanus]	_	_
	CI01000319_05406910_05407110	3.73305	3.52804	1.51e-06	4.7e-05		gi|1025221488|ref|XP_016425501.1| PREDICTED: nectin-2-like isoform X3 [Sinocyclocheilus rhinocerous]	_	_
	CI01000050_00793175_00797131	5.15088	1.60559	1.53e-06	4.75e-05		gi|224148001|ref|XP_002197777.1| PREDICTED: matrix metalloproteinase-23-like, partial [Taeniopygia guttata]	K08001	molecular_function:peptidase activity(GO:0008233)
	CI01000057_04543887_04545600	-4.62452	1.88728	1.54e-06	4.76e-05		gi|1025171166|ref|XP_016357857.1| PREDICTED: kinetochore protein Nuf2 isoform X1 [Sinocyclocheilus anshuiensis]	K11548	cellular_component:Ndc80 complex(GO:0031262);biological_process:mitotic nuclear division(GO:0007067);biological_process:heart development(GO:0007507);cellular_component:condensed chromosome kinetochore(GO:0000777);cellular_component:nucleus(GO:0005634);biological_process:cell division(GO:0051301)
	CI01000016_04385978_04389107	-3.9122	3.12034	1.55e-06	4.79e-05			_	_
	CI01000047_04606043_04610846	3.61806	4.3064	1.55e-06	4.79e-05		gi|1025249442|ref|XP_016368764.1| PREDICTED: glucose-6-phosphatase 3 [Sinocyclocheilus rhinocerous]	_	cellular_component:endoplasmic reticulum membrane(GO:0005789);biological_process:gluconeogenesis(GO:0006094);cellular_component:integral component of membrane(GO:0016021);molecular_function:glucose-6-phosphatase activity(GO:0004346)
	CI01000004_03433963_03436906	-3.46251	8.22156	1.56e-06	4.83e-05		gi|1025292871|ref|XP_016379056.1| PREDICTED: growth arrest and DNA damage-inducible protein GADD45 alpha-like [Sinocyclocheilus rhinocerous]	K04402	biological_process:response to stress(GO:0006950);cellular_component:nucleus(GO:0005634);biological_process:regulation of cell cycle(GO:0051726)
	CI01000072_02282323_02282873	-4.19211	2.63168	1.57e-06	4.84e-05		gi|1025096701|ref|XP_016344305.1| PREDICTED: max-binding protein MNT-like [Sinocyclocheilus anshuiensis]	_	_
	CI01000288_00050351_00060483	-4.19211	2.63168	1.57e-06	4.84e-05		gi|966702131|gb|KTG34372.1| hypothetical protein cypCar_00050059 [Cyprinus carpio]	_	_
	CI01000013_11623313_11627487	3.59965	4.64568	1.58e-06	4.88e-05		gi|1020398888|ref|XP_016147329.1| PREDICTED: calumenin-B-like [Sinocyclocheilus grahami]<>gi|1020398890|ref|XP_016147337.1| PREDICTED: calumenin-B-like [Sinocyclocheilus grahami]	_	_
	CI01000054_01231236_01238870	-3.70726	3.90607	1.6e-06	4.92e-05		gi|966713436|gb|KTG45674.1| hypothetical protein cypCar_00000666 [Cyprinus carpio]	K03231	_
	CI01000118_00160704_00167805	-3.89834	3.10765	1.61e-06	4.96e-05		gi|52219114|ref|NP_001004635.1| AP-1 complex subunit sigma-3 [Danio rerio]<>gi|51858832|gb|AAH81385.1| Zgc:101676 [Danio rerio]<>gi|152013106|gb|AAI50445.1| Zgc:101676 protein [Danio rerio]	K12395	cellular_component:membrane coat(GO:0030117);molecular_function:protein transporter activity(GO:0008565);biological_process:vesicle-mediated transport(GO:0016192);biological_process:intracellular protein transport(GO:0006886)
	CI01000000_18721338_18772372	-4.40342	2.36714	1.62e-06	4.96e-05		gi|1020507536|ref|XP_016092779.1| PREDICTED: gamma-aminobutyric acid receptor subunit beta-2-like isoform X1 [Sinocyclocheilus grahami]	K05181	_
	CI01000010_01083156_01088679	-4.40342	2.36714	1.62e-06	4.96e-05		gi|1024938408|ref|XP_016331243.1| PREDICTED: forkhead box protein P1-like [Sinocyclocheilus anshuiensis]	K09409	_
	CI01000398_00046520_00046961	-5.57776	1.36776	1.63e-06	4.98e-05		gi|13375189|gb|AAK20222.1|AF273879_1 immunoglobulin heavy chain variable region, partial [Danio rerio]	_	_
	CI01159320_00003828_00004377	-5.57776	1.36776	1.63e-06	4.98e-05		gi|1020579234|ref|XP_016115280.1| PREDICTED: CD209 antigen-like protein C [Sinocyclocheilus grahami]	_	_
	CI01000000_15091223_15092317	-3.56906	4.87875	1.65e-06	5.06e-05		gi|1024983502|ref|XP_016313489.1| PREDICTED: uncharacterized protein LOC107666597 [Sinocyclocheilus anshuiensis]	_	_
	CI01000311_00407170_00435116	3.65526	4.14422	1.65e-06	5.06e-05		gi|1020452512|ref|XP_016133615.1| PREDICTED: EMILIN-1-like isoform X2 [Sinocyclocheilus grahami]	_	_
	CI01000335_01029328_01043603	-3.75608	3.46476	1.67e-06	5.1e-05		gi|1024957444|ref|XP_016299652.1| PREDICTED: non-muscle caldesmon-like isoform X2 [Sinocyclocheilus anshuiensis]	K12327	_
	CI01000053_01751833_01753354	4.18211	2.18217	1.7e-06	5.18e-05		gi|1020477521|ref|XP_016144095.1| PREDICTED: uncharacterized protein LOC107597512 [Sinocyclocheilus grahami]	K09044	_
	CI01000153_01321593_01322636	4.18211	2.18217	1.7e-06	5.18e-05		gi|966642899|gb|KTF77811.1| hypothetical protein cypCar_00037446 [Cyprinus carpio]	_	_
	CI01000053_00236043_00262938	-4.93321	1.64213	1.72e-06	5.19e-05		gi|1025347173|ref|XP_016393804.1| PREDICTED: small G protein signaling modulator 2-like [Sinocyclocheilus rhinocerous]	_	_
	CI01000221_00386840_00419107	-4.93321	1.64213	1.72e-06	5.19e-05		gi|1020427708|ref|XP_016131845.1| PREDICTED: testican-1-like isoform X1 [Sinocyclocheilus grahami]<>gi|1020427710|ref|XP_016131846.1| PREDICTED: testican-1-like isoform X1 [Sinocyclocheilus grahami]	K08136	_
	CI01000304_14318806_14323940	-4.93321	1.64213	1.72e-06	5.19e-05		gi|1020396062|ref|XP_016132167.1| PREDICTED: zona pellucida-like domain-containing protein 1 [Sinocyclocheilus grahami]	_	_
	CI01000304_18522814_18538374	-3.45014	7.59149	1.72e-06	5.19e-05		gi|1025117716|ref|XP_016412132.1| PREDICTED: SAM and SH3 domain-containing protein 1-like isoform X1 [Sinocyclocheilus rhinocerous]	_	_
	CI01000053_04276080_04288879	-8.43252	0.972303	1.72e-06	5.19e-05		gi|55742420|ref|NP_001007032.1| protein FAM101A [Danio rerio]<>gi|126631815|gb|AAI33867.1| Family with sequence similarity 101, member A [Danio rerio]	_	_
	CI01000398_00017770_00018224	-8.43252	0.972303	1.72e-06	5.19e-05		gi|1041529453|gb|ANO53445.1| immunoglobulin mu heavy chain [Squaliobarbus curriculus]	_	_
	CI01000000_07818095_07875687	8.42808	0.885102	1.72e-06	5.19e-05		gi|1025059188|ref|XP_016332553.1| PREDICTED: dystrophin-related protein 2 isoform X2 [Sinocyclocheilus anshuiensis]	_	_
	CI01000004_11598169_11606266	8.42808	0.885102	1.72e-06	5.19e-05		gi|1025273000|ref|XP_016375123.1| PREDICTED: MAM and LDL-receptor class A domain-containing protein 1-like [Sinocyclocheilus rhinocerous]	_	_
	CI01000018_03513125_03558562	8.42808	0.885102	1.72e-06	5.19e-05		gi|966644064|gb|KTF78976.1| hypothetical protein cypCar_00009052 [Cyprinus carpio]	K14356	_
	CI01000030_06940324_06983295	8.42808	0.885102	1.72e-06	5.19e-05		gi|1025175409|ref|XP_016420279.1| PREDICTED: uncharacterized protein LOC107749630 [Sinocyclocheilus rhinocerous]	_	_
	CI01000176_00144075_00155699	8.42808	0.885102	1.72e-06	5.19e-05		gi|1024973521|ref|XP_016308269.1| PREDICTED: long-chain fatty acid transport protein 1-like [Sinocyclocheilus anshuiensis]<>gi|1024973523|ref|XP_016308271.1| PREDICTED: long-chain fatty acid transport protein 1-like [Sinocyclocheilus anshuiensis]	_	molecular_function:catalytic activity(GO:0003824);biological_process:metabolic process(GO:0008152)
	CI01000063_01739754_01764028	-3.7704	3.39277	1.73e-06	5.23e-05		gi|1025385093|ref|XP_016401606.1| PREDICTED: inactive rhomboid protein 1-like isoform X2 [Sinocyclocheilus rhinocerous]	_	_
	CI01000325_09788977_09798073	-3.43228	11.0866	1.74e-06	5.23e-05		gi|449507967|ref|XP_004176252.1| PREDICTED: LOW QUALITY PROTEIN: influenza virus NS1A-binding protein [Taeniopygia guttata]	K15046	_
	CI01000325_05137802_05168331	3.5518	4.8634	1.74e-06	5.23e-05		gi|966669539|gb|KTG02920.1| hypothetical protein cypCar_00032852 [Cyprinus carpio]	K13402	biological_process:single-organism metabolic process(GO:0044710);molecular_function:nucleotide binding(GO:0000166);molecular_function:catalytic activity(GO:0003824)
	CI01000344_01946446_01954355	3.68067	3.72824	1.74e-06	5.25e-05		gi|545693664|gb|AGW47747.1| tumor necrosis factor superfamily member 12 [Ctenopharyngodon idella]	K05474	_
	CI01000027_05800016_05802929	4.57803	1.99448	1.79e-06	5.37e-05		gi|938063716|gb|KPP64933.1| protein slowmo1-like [Scleropages formosus]	_	_
	CI01000006_01897638_01904724	-3.4267	9.11541	1.82e-06	5.48e-05		gi|1025018471|ref|XP_016323097.1| PREDICTED: cationic amino acid transporter 3-like isoform X1 [Sinocyclocheilus anshuiensis]	K13865	_
	CI01000054_02589793_02592201	3.51872	5.24642	1.85e-06	5.54e-05		gi|1024934896|ref|XP_016317740.1| PREDICTED: BET1 homolog [Sinocyclocheilus anshuiensis]	K08504	_
	CI01000050_02785728_02797909	-3.47015	6.27761	1.85e-06	5.54e-05		gi|1025312667|ref|XP_016384453.1| PREDICTED: phytanoyl-CoA hydroxylase-interacting protein-like [Sinocyclocheilus rhinocerous]<>gi|1025312671|ref|XP_016384455.1| PREDICTED: phytanoyl-CoA hydroxylase-interacting protein-like [Sinocyclocheilus rhinocerous]	_	_
	CI01000027_06115259_06133739	-4.37998	2.34564	1.86e-06	5.57e-05		gi|1025224740|ref|XP_016365679.1| PREDICTED: transmembrane protein 145-like, partial [Sinocyclocheilus rhinocerous]	_	_
	CI01000344_00908257_00909213	-5.55397	1.34612	1.87e-06	5.58e-05		gi|966661553|gb|KTF96167.1| hypothetical protein cypCar_00041909 [Cyprinus carpio]	_	_
	CI01000069_04942590_04973602	-3.41949	12.0917	1.87e-06	5.58e-05		gi|89520723|gb|ABD76396.1| immunoglobulin mu heavy chain [Ctenopharyngodon idella]	_	_
	CI01000398_00053958_00054412	-3.64213	4.01318	1.87e-06	5.58e-05		gi|966702133|gb|KTG34374.1| hypothetical protein cypCar_00048177 [Cyprinus carpio]	_	_
	CI01000043_01383746_01406582	4.78045	1.79518	1.87e-06	5.58e-05		gi|1025336885|ref|XP_016391036.1| PREDICTED: peroxisome proliferator-activated receptor gamma coactivator 1-alpha isoform X3 [Sinocyclocheilus rhinocerous]	K07202	_
	CI01000016_01659416_01671969	3.49749	5.26245	1.88e-06	5.59e-05		gi|62122921|ref|NP_001014381.1| uncharacterized protein LOC541546 isoform 1 precursor [Danio rerio]<>gi|61402601|gb|AAH91810.1| Zgc:113232 [Danio rerio]<>gi|182891984|gb|AAI65639.1| Zgc:113232 protein [Danio rerio]	_	_
	CI01180000_05566677_05569815	-3.49112	5.5273	1.88e-06	5.59e-05		gi|1020410478|ref|XP_016123878.1| PREDICTED: arachidonate 5-lipoxygenase-like isoform X1 [Sinocyclocheilus grahami]	K00461	_
	CI01000006_04145907_04147044	3.65051	3.91238	1.89e-06	5.63e-05		gi|1025166062|ref|XP_016356933.1| PREDICTED: stromal cell-derived factor 2-like [Sinocyclocheilus anshuiensis]	_	_
	CI01000060_00446541_00456393	-3.5708	4.54137	1.89e-06	5.63e-05		gi|1025080689|ref|XP_016339938.1| PREDICTED: rho GTPase-activating protein 11A-like isoform X1 [Sinocyclocheilus anshuiensis]	_	_
	CI01000118_00505922_00510970	-3.49995	5.43175	1.91e-06	5.67e-05		gi|1025155436|ref|XP_016354990.1| PREDICTED: integral membrane protein 2C-like isoform X1 [Sinocyclocheilus anshuiensis]	K18265	_
	CI01000072_00178958_00188889	5.10657	1.56415	1.92e-06	5.7e-05		gi|1024944056|ref|XP_016361004.1| PREDICTED: tripartite motif-containing protein 16-like [Sinocyclocheilus anshuiensis]	_	_
	CI01000000_13087976_13097052	-4.91362	1.62431	1.92e-06	5.7e-05		gi|1025400801|ref|XP_016407880.1| PREDICTED: sushi repeat-containing protein SRPX2 [Sinocyclocheilus rhinocerous]	K19408	_
	CI01000006_04455069_04463903	-3.47798	5.71715	1.93e-06	5.71e-05		gi|966651185|gb|KTF86087.1| hypothetical protein cypCar_00025962 [Cyprinus carpio]	K00802	biological_process:spermine biosynthetic process(GO:0006597);molecular_function:spermine synthase activity(GO:0016768)
	CI01000304_07282197_07285838	-3.9571	2.90811	1.95e-06	5.77e-05		gi|1025044723|ref|XP_016328659.1| PREDICTED: protein phosphatase 1 regulatory subunit 3B-like isoform X1 [Sinocyclocheilus anshuiensis]	_	_
	CI01000138_01216390_01239640	-3.44919	6.45039	1.98e-06	5.84e-05		gi|1025388059|ref|XP_016404423.1| PREDICTED: alpha-adducin-like isoform X1 [Sinocyclocheilus rhinocerous]	K18622	_
	CI01180000_09062947_09063618	3.48998	5.40533	1.98e-06	5.86e-05		gi|1025382637|ref|XP_016400944.1| PREDICTED: probable N-acetyltransferase camello isoform X1 [Sinocyclocheilus rhinocerous]	_	_
	CI01000027_05769594_05773182	4.16718	2.16836	1.99e-06	5.86e-05		gi|1025323803|ref|XP_016387460.1| PREDICTED: protein FAM84B-like [Sinocyclocheilus rhinocerous]	_	_
	CI01000010_01954571_01961365	-3.47736	5.54769	1.99e-06	5.88e-05		gi|966651654|gb|KTF86556.1| hypothetical protein cypCar_00008142 [Cyprinus carpio]	K14640	_
	CI01000306_03704267_03746574	-3.42943	7.0495	2.02e-06	5.95e-05		gi|966639420|gb|KTF74524.1| hypothetical protein cypCar_00027163 [Cyprinus carpio]	K12488	_
	CI01000339_00986443_01008656	-3.5515	4.55807	2.04e-06	6e-05		gi|189518885|ref|XP_001923441.1| PREDICTED: rho guanine nucleotide exchange factor 9 isoform X3 [Danio rerio]	K05769	_
	CI01000013_11280259_11284882	-8.4009	0.943672	2.05e-06	6.01e-05		gi|1020398864|ref|XP_016147206.1| PREDICTED: protein tyrosine phosphatase domain-containing protein 1-like [Sinocyclocheilus grahami]	_	_
	CI01000027_08091338_08097220	-8.4009	0.943672	2.05e-06	6.01e-05		gi|1020424582|ref|XP_016131320.1| PREDICTED: soluble guanylate cyclase 88E-like [Sinocyclocheilus grahami]	K01769	_
	CI01000046_06456550_06456910	-8.4009	0.943672	2.05e-06	6.01e-05		gi|966660443|gb|KTF95297.1| hypothetical protein cypCar_00036785 [Cyprinus carpio]	K12485	molecular_function:Rab GTPase binding(GO:0017137);biological_process:cytokinesis(GO:0000910);biological_process:regulation of cell cycle(GO:0051726);cellular_component:midbody(GO:0030496);cellular_component:endocytic vesicle(GO:0030139);biological_process:eye morphogenesis(GO:0048592);cellular_component:cleavage furrow(GO:0032154);molecular_function:ADP-ribosylation factor binding(GO:0030306);cel…
	CI01000030_09181881_09195357	-3.9992	2.80085	2.07e-06	6.07e-05		gi|1025367049|ref|XP_016396741.1| PREDICTED: uncharacterized protein LOC107730409 [Sinocyclocheilus rhinocerous]	_	_
	CI01000001_00231916_00237164	5.72003	1.26379	2.14e-06	6.24e-05		gi|1020572975|ref|XP_016114056.1| PREDICTED: protein-glutamine gamma-glutamyltransferase K-like [Sinocyclocheilus grahami]	_	_
	CI01000039_07738530_07773662	5.72003	1.26379	2.14e-06	6.24e-05		gi|185134552|ref|NP_001117921.1| latent transforming growth factor binding protein precursor [Oncorhynchus mykiss]<>gi|27549564|gb|AAO17057.1| latent transforming growth factor binding protein [Oncorhynchus mykiss]	K08023	molecular_function:calcium ion binding(GO:0005509)
	CI01000072_00824625_00842268	5.72003	1.26379	2.14e-06	6.24e-05		gi|1024978998|ref|XP_016311079.1| PREDICTED: T-box transcription factor TBX4-like [Sinocyclocheilus anshuiensis]<>gi|1024979000|ref|XP_016311080.1| PREDICTED: T-box transcription factor TBX4-like [Sinocyclocheilus anshuiensis]	K10178	_
	CI01106876_00000483_00001383	5.72003	1.26379	2.14e-06	6.24e-05		gi|966652105|gb|KTF87007.1| hypothetical protein cypCar_00041942 [Cyprinus carpio]	_	_
	CI01000030_01384095_01386916	-5.52977	1.32416	2.14e-06	6.24e-05		gi|1024996650|ref|XP_016317679.1| PREDICTED: cathepsin L1-like [Sinocyclocheilus anshuiensis]	_	molecular_function:cysteine-type peptidase activity(GO:0008234);biological_process:proteolysis(GO:0006508)
	CI01000050_03129712_03134758	-5.52977	1.32416	2.14e-06	6.24e-05		gi|1025147005|ref|XP_016354490.1| PREDICTED: T-box-containing protein TBX6L-like [Sinocyclocheilus anshuiensis]	K10180	_
	CI01000213_00218497_00224213	-5.52977	1.32416	2.14e-06	6.24e-05		gi|836467419|ref|NP_999963.2| syntenin-1 [Danio rerio]	_	_
	CI01000119_02626427_02635046	-3.73565	3.36107	2.15e-06	6.25e-05		gi|1040655485|ref|XP_002667644.4| PREDICTED: uncharacterized protein LOC100334275 [Danio rerio]	_	_
	CI01000186_00215443_00223579	-3.50446	4.95084	2.16e-06	6.27e-05		gi|1024986112|ref|XP_016314836.1| PREDICTED: serine/threonine-protein kinase 38-like [Sinocyclocheilus anshuiensis]	_	_
	CI01000051_03715317_03785390	-3.99054	2.79294	2.18e-06	6.34e-05		gi|966708859|gb|KTG41097.1| hypothetical protein cypCar_00002547 [Cyprinus carpio]	_	_
	CI01000016_04557546_04579200	-3.4168	7.20628	2.18e-06	6.34e-05		gi|1025327401|ref|XP_016388450.1| PREDICTED: ETS domain-containing transcription factor ERF-like isoform X1 [Sinocyclocheilus rhinocerous]<>gi|1025327405|ref|XP_016388451.1| PREDICTED: ETS domain-containing transcription factor ERF-like isoform X2 [Sinocyclocheilus rhinocerous]	K09434	_
	CI01000158_01595127_01599555	3.82831	3.04051	2.19e-06	6.34e-05		gi|1024963042|ref|XP_016302639.1| PREDICTED: toll-like receptor 8 [Sinocyclocheilus anshuiensis]	K10170	_
	CI01000016_08513514_08545976	-3.42967	6.41534	2.23e-06	6.46e-05		gi|966639881|gb|KTF74795.1| hypothetical protein cypCar_00035453 [Cyprinus carpio]	_	_
	CI01000030_10865700_10868055	-3.72664	3.59423	2.24e-06	6.49e-05			_	_
	CI01000302_01133042_01149570	-3.44289	6.09806	2.25e-06	6.52e-05		gi|1025146169|ref|XP_016415711.1| PREDICTED: uncharacterized protein LOC107746128 [Sinocyclocheilus rhinocerous]	_	_
	CI01000306_08690665_08696165	3.40847	7.09135	2.25e-06	6.52e-05		gi|395824549|ref|XP_003785525.1| PREDICTED: ADP-ribosylation factor-like protein 8B [Otolemur garnettii]	K07955	molecular_function:GTP binding(GO:0005525);cellular_component:intracellular(GO:0005622);biological_process:small GTPase mediated signal transduction(GO:0007264)
	CI01000047_02945353_02965219	-3.40406	7.43635	2.27e-06	6.54e-05		gi|1024978352|ref|XP_016310733.1| PREDICTED: TBC1 domain family member 12-like isoform X1 [Sinocyclocheilus anshuiensis]	_	_
	CI01000124_00045042_00052252	-3.39563	8.42108	2.28e-06	6.58e-05		gi|642127196|emb|CDQ60379.1| unnamed protein product [Oncorhynchus mykiss]	_	_
	CI01000030_07868597_07886123	3.40217	7.47916	2.29e-06	6.59e-05		gi|1025128246|ref|XP_016351112.1| PREDICTED: protein shisa-5-like [Sinocyclocheilus anshuiensis]<>gi|1025128252|ref|XP_016351113.1| PREDICTED: protein shisa-5-like [Sinocyclocheilus anshuiensis]<>gi|1025128257|ref|XP_016351114.1| PREDICTED: protein shisa-5-like [Sinocyclocheilus anshuiensis]	K10135	_
	CI01000001_13225062_13233285	3.42205	6.47685	2.31e-06	6.65e-05		gi|1025002761|ref|XP_016320368.1| PREDICTED: NACHT, LRR and PYD domains-containing protein 12-like isoform X1 [Sinocyclocheilus anshuiensis]	_	_
	CI01000010_02243991_02251195	-3.72166	3.58968	2.31e-06	6.65e-05		gi|966656551|gb|KTF91405.1| hypothetical protein cypCar_00009075 [Cyprinus carpio]	K00149	_
	CI01000059_08673319_08708127	3.84058	2.94712	2.33e-06	6.69e-05		gi|1025029742|ref|XP_016324564.1| PREDICTED: uncharacterized protein LOC107674925 isoform X1 [Sinocyclocheilus anshuiensis]<>gi|1025029745|ref|XP_016324565.1| PREDICTED: uncharacterized protein LOC107674925 isoform X1 [Sinocyclocheilus anshuiensis]	_	_
	CI01000211_00277426_00283175	4.39361	2.12749	2.33e-06	6.69e-05		gi|966714832|gb|KTG47070.1| hypothetical protein cypCar_00043138 [Cyprinus carpio]	_	_
	CI01000026_05051542_05067517	3.45888	5.29558	2.37e-06	6.8e-05		gi|190337771|gb|AAI63897.1| Aldehyde dehydrogenase 1 family, member A2 [Danio rerio]	K07249	biological_process:camera-type eye morphogenesis(GO:0048593);molecular_function:oxidoreductase activity, acting on the aldehyde or oxo group of donors, NAD or NADP as acceptor(GO:0016620);biological_process:retinoic acid receptor signaling pathway(GO:0048384);biological_process:myelination in peripheral nervous system(GO:0022011);biological_process:face morphogenesis(GO:0060325);biological_proces…
	CI01000046_00589815_00591549	-3.42242	6.19437	2.37e-06	6.8e-05		gi|1025038488|ref|XP_016326949.1| PREDICTED: microfibril-associated glycoprotein 4-like [Sinocyclocheilus anshuiensis]	_	_
	CI01000010_02459092_02463170	3.39705	7.32101	2.4e-06	6.89e-05		gi|1025370314|ref|XP_016397619.1| PREDICTED: major facilitator superfamily domain-containing protein 12 isoform X2 [Sinocyclocheilus rhinocerous]	_	_
	CI01000178_00723152_00735586	-3.48342	5.09723	2.41e-06	6.89e-05		gi|1024981208|ref|XP_016312267.1| PREDICTED: myosin-IIIb-like [Sinocyclocheilus anshuiensis]	_	_
	CI01000027_05586817_05589381	-4.85319	1.56945	2.43e-06	6.96e-05		gi|1025323950|ref|XP_016387502.1| PREDICTED: hyaluronan synthase 1-like [Sinocyclocheilus rhinocerous]	K00752	_
	CI01000146_01105336_01109459	8.39166	0.85128	2.45e-06	6.99e-05		gi|1024943087|ref|XP_016360734.1| PREDICTED: uncharacterized protein LOC107702830 [Sinocyclocheilus anshuiensis]	_	_
	CI01000160_00932989_00937494	8.39166	0.85128	2.45e-06	6.99e-05		gi|966709652|gb|KTG41890.1| hypothetical protein cypCar_00042962 [Cyprinus carpio]	_	_
	CI01000339_03101791_03105729	-8.36858	0.914451	2.45e-06	6.99e-05		gi|966664743|gb|KTF98745.1| hypothetical protein cypCar_00014736, partial [Cyprinus carpio]	K17813	molecular_function:heme binding(GO:0020037);molecular_function:oxidoreductase activity, acting on paired donors, with incorporation or reduction of molecular oxygen, reduced flavin or flavoprotein as one donor, and incorporation of one atom of oxygen(GO:0016712);molecular_function:iron ion binding(GO:0005506);molecular_function:electron carrier activity(GO:0009055);biological_process:oxidation-re…
	CI01000000_02496792_02498535	-3.3877	7.63925	2.46e-06	7e-05		gi|431897118|gb|ELK06380.1| Sodium/hydrogen exchanger-like domain-containing protein 1 [Pteropus alecto]	K06689	_
	CI01000020_02445017_02445376	-3.42802	5.87399	2.46e-06	7e-05			_	_
	CI01000340_00151447_00155343	5.69208	1.23775	2.47e-06	7.02e-05		gi|1020580080|ref|XP_016115444.1| PREDICTED: growth factor receptor-bound protein 2-like, partial [Sinocyclocheilus grahami]	K04364	_
	CI01000417_00011640_00036840	3.38973	7.36859	2.49e-06	7.08e-05		gi|1025091101|ref|XP_016342782.1| PREDICTED: band 4.1-like protein 3 isoform X3 [Sinocyclocheilus anshuiensis]	K06107	_
	CI01000330_04056691_04059922	3.80338	3.01751	2.5e-06	7.09e-05		gi|1025191116|ref|XP_016423786.1| PREDICTED: COMM domain-containing protein 4-like [Sinocyclocheilus rhinocerous]	_	_
	CI01000013_02999657_03003223	4.3782	2.11315	2.52e-06	7.17e-05		gi|1020413496|ref|XP_016125510.1| PREDICTED: C-factor-like isoform X1 [Sinocyclocheilus grahami]	_	_
	CI01000027_07695223_07701346	-3.51834	4.49352	2.54e-06	7.2e-05		gi|1025093781|ref|XP_016343520.1| PREDICTED: nestin-like [Sinocyclocheilus anshuiensis]	K07609	_
	CI01000219_00395766_00406379	4.50941	1.93054	2.55e-06	7.22e-05		gi|1025228802|ref|XP_016431690.1| PREDICTED: sialoadhesin-like [Sinocyclocheilus rhinocerous]	K06467	_
	CI01000142_00578281_00590749	3.46221	5.15824	2.55e-06	7.22e-05		gi|688549291|ref|XP_009298801.1| PREDICTED: guanylate-binding protein 1 isoform X2 [Danio rerio]	_	_
	CI01000158_00757981_00771461	3.62167	3.61578	2.56e-06	7.25e-05		gi|1020515832|ref|XP_016097210.1| PREDICTED: transcription factor 7-like 1-A [Sinocyclocheilus grahami]	K04490	_
	CI01000000_10417521_10426279	-3.38408	7.37984	2.59e-06	7.32e-05		gi|966702774|gb|KTG35015.1| hypothetical protein cypCar_00003410, partial [Cyprinus carpio]	K13865	_
	CI01000021_02378299_02383589	-3.81961	3.0358	2.61e-06	7.37e-05		gi|1020414859|ref|XP_016126250.1| PREDICTED: lectin-B-like isoform X13 [Sinocyclocheilus grahami]	_	_
	CI01000145_01053618_01065287	-3.57494	4.00341	2.61e-06	7.37e-05		gi|1024926787|ref|XP_016359243.1| PREDICTED: zinc-alpha-2-glycoprotein-like isoform X1 [Sinocyclocheilus anshuiensis]	_	_
	CI01000030_07307842_07309188	3.43196	5.57174	2.61e-06	7.37e-05		gi|1024947486|ref|XP_016362826.1| PREDICTED: mid1-interacting protein 1-B [Sinocyclocheilus anshuiensis]<>gi|1024947488|ref|XP_016362827.1| PREDICTED: mid1-interacting protein 1-B [Sinocyclocheilus anshuiensis]	_	cellular_component:cytoplasm(GO:0005737);cellular_component:microtubule(GO:0005874);cellular_component:nucleus(GO:0005634)
	CI01000300_00985328_00994984	3.60697	3.66049	2.67e-06	7.51e-05		gi|1024942371|ref|XP_016360347.1| PREDICTED: MICAL-like protein 2 isoform X1 [Sinocyclocheilus anshuiensis]	_	_
	CI01000021_01519982_01528860	3.40677	6.09574	2.7e-06	7.59e-05		gi|1025139022|ref|XP_016353074.1| PREDICTED: glutathione synthetase [Sinocyclocheilus anshuiensis]<>gi|1025139028|ref|XP_016353075.1| PREDICTED: glutathione synthetase [Sinocyclocheilus anshuiensis]	K01920	_
	CI01000004_07903583_07906667	3.35676	9.58944	2.72e-06	7.65e-05		gi|1025319653|ref|XP_016386362.1| PREDICTED: gamma-interferon-inducible lysosomal thiol reductase-like [Sinocyclocheilus rhinocerous]	_	_
	CI01000006_01525438_01530330	5.03743	1.49971	2.74e-06	7.69e-05		gi|1025177715|ref|XP_016420677.1| PREDICTED: carbonic anhydrase 4-like [Sinocyclocheilus rhinocerous]	K18246	_
	CI01000242_00013049_00016550	3.56398	4.06029	2.77e-06	7.76e-05		gi|974075414|ref|XP_015235220.1| PREDICTED: cysteine and histidine-rich domain-containing protein 1 [Cyprinodon variegatus]	K16729	_
	CI01000251_00096267_00097427	-3.43652	5.22301	2.8e-06	7.84e-05		gi|1020573655|ref|XP_016114189.1| PREDICTED: protein Tob2-like [Sinocyclocheilus grahami]	K14443	_
	CI01000008_02492407_02497767	-3.35925	8.3121	2.81e-06	7.88e-05		gi|1025311784|ref|XP_016384214.1| PREDICTED: cyclin-G2-like [Sinocyclocheilus rhinocerous]<>gi|1025311788|ref|XP_016384215.1| PREDICTED: cyclin-G2-like [Sinocyclocheilus rhinocerous]	K10146	_
	CI01000037_00112427_00135114	3.39205	6.17235	2.83e-06	7.92e-05		gi|1025043425|ref|XP_016328295.1| PREDICTED: unconventional myosin-X-like [Sinocyclocheilus anshuiensis]	K12559	_
	CI01000075_01478557_01486032	-5.48014	1.27917	2.85e-06	7.95e-05		gi|528472369|ref|XP_005171520.1| PREDICTED: phosphatidylinositol 4-phosphate 5-kinase type-1 gamma isoform X1 [Danio rerio]	K00889	_
	CI01000030_02678940_02684491	-5.45466	1.25614	2.85e-06	7.95e-05		gi|1025305729|ref|XP_016382569.1| PREDICTED: granzyme-like protein 1 [Sinocyclocheilus rhinocerous]	_	_
	CI01000033_01805479_01816594	-5.45466	1.25614	2.85e-06	7.95e-05		gi|1020424965|ref|XP_016131421.1| PREDICTED: serine/threonine-protein kinase LMTK1-like isoform X2 [Sinocyclocheilus grahami]	K17480	_
	CI01000325_10200118_10220665	-3.38521	6.25761	2.94e-06	8.2e-05		gi|1025154441|ref|XP_016354814.1| PREDICTED: saccharopine dehydrogenase-like oxidoreductase isoform X1 [Sinocyclocheilus anshuiensis]	K17581	molecular_function:oxidoreductase activity(GO:0016491);biological_process:oxidation-reduction process(GO:0055114);molecular_function:nucleotide binding(GO:0000166)
	CI01000013_02321895_02371964	3.36122	7.01522	3.02e-06	8.43e-05		gi|1025280857|ref|XP_016377244.1| PREDICTED: myocyte-specific enhancer factor 2A-like isoform X6 [Sinocyclocheilus rhinocerous]	K09260	_
	CI01000020_01383268_01384854	3.39893	5.76731	3.03e-06	8.44e-05		gi|966709095|gb|KTG41333.1| hypothetical protein cypCar_00007474, partial [Cyprinus carpio]	_	_
	CI01000004_07043037_07053182	-4.28706	1.96144	3.06e-06	8.51e-05		gi|966701853|gb|KTG34094.1| hypothetical protein cypCar_00038972 [Cyprinus carpio]	K05857	_
	CI01000060_00381508_00427320	-4.81145	1.53167	3.09e-06	8.58e-05		gi|1025047976|ref|XP_016329558.1| PREDICTED: ryanodine receptor 3-like [Sinocyclocheilus anshuiensis]	K04963	_
	CI01000277_00210643_00215597	-4.81145	1.53167	3.09e-06	8.58e-05		gi|1025236165|ref|XP_016365141.1| PREDICTED: leucine-rich repeat-containing protein 51-like isoform X2 [Sinocyclocheilus rhinocerous]	_	_
	CI01000347_00464673_00477209	-3.52744	4.05797	3.09e-06	8.58e-05		gi|1025262748|ref|XP_016372344.1| PREDICTED: CMRF35-like molecule 3 [Sinocyclocheilus rhinocerous]	_	_
	CI01000165_00286033_00288403	-4.28225	2.25625	3.1e-06	8.6e-05			_	_
	CI01000069_03991989_03994139	-3.99272	2.6327	3.13e-06	8.67e-05		gi|1025092791|ref|XP_016343249.1| PREDICTED: protein unc-119 homolog B-B-like [Sinocyclocheilus anshuiensis]	_	_
	CI01000052_01740725_01756746	-3.74867	3.08272	3.15e-06	8.73e-05		gi|966656039|gb|KTF90893.1| hypothetical protein cypCar_00014886, partial [Cyprinus carpio]	K01490	_
	CI01000347_00640439_00641061	3.41028	5.33246	3.17e-06	8.76e-05		gi|1024938480|ref|XP_016331659.1| PREDICTED: sulfiredoxin-1 [Sinocyclocheilus anshuiensis]	K12260	biological_process:oxidation-reduction process(GO:0055114);molecular_function:DNA binding(GO:0003677);molecular_function:sulfiredoxin activity(GO:0032542)
	CI01000258_00038193_00041078	-4.15744	2.38948	3.2e-06	8.84e-05		gi|974104817|ref|XP_015251326.1| PREDICTED: uncharacterized protein LOC107098268 [Cyprinodon variegatus]	_	_
	CI01000218_00064161_00064417	-3.8662	2.82524	3.22e-06	8.89e-05		gi|1020514730|ref|XP_016096605.1| PREDICTED: PCTP-like protein [Sinocyclocheilus grahami]	_	_
	CI01000059_07614355_07620651	3.49407	4.07808	3.23e-06	8.92e-05		gi|41054183|ref|NP_956113.1| phosphoserine aminotransferase isoform 1 [Danio rerio]<>gi|27881918|gb|AAH44467.1| Phosphoserine aminotransferase 1 [Danio rerio]	K00831	molecular_function:pyridoxal phosphate binding(GO:0030170);molecular_function:O-phospho-L-serine:2-oxoglutarate aminotransferase activity(GO:0004648);biological_process:L-serine biosynthetic process(GO:0006564)
	CI01000112_00943876_00960636	-4.06053	2.51141	3.27e-06	9e-05		gi|1024995426|ref|XP_016317294.1| PREDICTED: ATPase family AAA domain-containing protein 5-like [Sinocyclocheilus anshuiensis]<>gi|1024995430|ref|XP_016317296.1| PREDICTED: ATPase family AAA domain-containing protein 5-like [Sinocyclocheilus anshuiensis]	_	_
	CI01000339_06486384_06493464	-4.06053	2.51141	3.27e-06	9e-05		gi|39752653|ref|NP_945333.1| P2X purinoceptor 1 [Danio rerio]<>gi|33520716|gb|AAQ21194.1| ATP-gated ionotropic P2X receptor subunit 1 [Danio rerio]	K05215	biological_process:purinergic nucleotide receptor signaling pathway(GO:0035590);cellular_component:integral component of membrane(GO:0016021);molecular_function:ATP binding(GO:0005524);molecular_function:extracellular ATP-gated cation channel activity(GO:0004931);molecular_function:purinergic nucleotide receptor activity(GO:0001614);biological_process:cation transport(GO:0006812)
	CI01000093_01155146_01166220	3.44229	4.8102	3.28e-06	9.01e-05		gi|1025150454|ref|XP_016416435.1| PREDICTED: CUE domain-containing protein 1-like [Sinocyclocheilus rhinocerous]<>gi|1025150459|ref|XP_016416436.1| PREDICTED: CUE domain-containing protein 1-like [Sinocyclocheilus rhinocerous]	_	_
	CI01000340_18523374_18528658	-3.33324	8.19423	3.28e-06	9.02e-05		gi|1024944313|ref|XP_016361142.1| PREDICTED: PRELI domain containing protein 3B [Sinocyclocheilus anshuiensis]	_	_
	CI01000012_04966772_04976751	5.6345	1.18424	3.29e-06	9.04e-05		gi|975106245|ref|XP_015268502.1| PREDICTED: glycogen phosphorylase, brain form [Gekko japonicus]	K00688	_
	CI01000098_00573428_00576294	-4.27132	1.9472	3.35e-06	9.21e-05		gi|1024967837|ref|XP_016305201.1| PREDICTED: aquaporin-1-like [Sinocyclocheilus anshuiensis]	K09864	_
	CI01000300_01225430_01228695	3.39677	5.22206	3.38e-06	9.28e-05		gi|1025107594|ref|XP_016347290.1| PREDICTED: phosphomannomutase 2-like [Sinocyclocheilus anshuiensis]	K17497	molecular_function:phosphomannomutase activity(GO:0004615);cellular_component:cytoplasm(GO:0005737);biological_process:mannose biosynthetic process(GO:0019307)
	CI01000052_01688014_01697072	-3.34947	6.7276	3.41e-06	9.34e-05		gi|1025370531|ref|XP_016397674.1| PREDICTED: TRAF3-interacting JNK-activating modulator-like [Sinocyclocheilus rhinocerous]	K11995	_
	CI01000334_00016497_00019305	-3.40438	5.15348	3.46e-06	9.47e-05		gi|148614117|gb|ABQ96287.1| immunoglobulin light chain [Danio rerio]	_	_
	CI01000288_00046760_00048176	-4.46912	1.74623	3.46e-06	9.47e-05		gi|335987437|gb|AEH76786.1| immunoglobulin HY heavy chain [Ctenopharyngodon idella]	_	_
	CI01000315_00028012_00032029	3.37255	5.63483	3.46e-06	9.47e-05		gi|528506808|ref|XP_005158931.1| PREDICTED: GSK3-beta interaction protein isoform X1 [Danio rerio]	_	_
	CI01000063_05563124_05584474	-4.79012	1.5124	3.49e-06	9.53e-05		gi|752808690|gb|AJG42203.1| hypoxia-inducible factor 2 alpha A [Hypophthalmichthys nobilis]	K09095	_
	CI01000219_00491137_00491488	8.31595	0.781206	3.54e-06	9.61e-05		gi|1024966139|ref|XP_016304289.1| PREDICTED: CMRF35-like molecule 2 [Sinocyclocheilus anshuiensis]	_	_
	CI01000037_00458429_00460090	-8.30167	0.854139	3.54e-06	9.61e-05		gi|1025187476|ref|XP_016422731.1| PREDICTED: frizzled-7-A-like [Sinocyclocheilus rhinocerous]	K02432	_
	CI01000054_02434020_02435538	-8.30167	0.854139	3.54e-06	9.61e-05		gi|966646330|gb|KTF81242.1| hypothetical protein cypCar_00032212 [Cyprinus carpio]	K10326	_
	CI01000069_04574882_04576116	-8.30167	0.854139	3.54e-06	9.61e-05		gi|966670874|gb|KTG04255.1| hypothetical protein cypCar_00032336, partial [Cyprinus carpio]	_	_
	CI01000189_00527327_00527614	-8.30167	0.854139	3.54e-06	9.61e-05			_	_
	CI01000050_02211327_02213220	-8.26702	0.822993	3.54e-06	9.61e-05		gi|919081010|ref|XP_013421627.1| PREDICTED: 52 kDa repressor of the inhibitor of the protein kinase-like [Lingula anatina]	_	_
	CI01000055_06745713_06774627	-8.26702	0.822993	3.54e-06	9.61e-05		gi|1020405950|ref|XP_016116115.1| PREDICTED: membrane-associated guanylate kinase, WW and PDZ domain-containing protein 2-like [Sinocyclocheilus grahami]	K06112	_
	CI01180000_00470482_00492406	-8.26702	0.822993	3.54e-06	9.61e-05		gi|1024920887|ref|XP_016341659.1| PREDICTED: integrin alpha-9-like [Sinocyclocheilus anshuiensis]	_	_
	CI01000023_00119570_00124698	-3.84904	2.80964	3.57e-06	9.67e-05		gi|966714192|gb|KTG46430.1| hypothetical protein cypCar_00018546 [Cyprinus carpio]	_	_
	CI01000346_01616693_01617965	3.56684	3.50491	3.58e-06	9.71e-05		gi|700674257|ref|NP_001289553.1| small integral membrane protein 20 [Danio rerio]	_	_
	CI01000000_12943231_12957101	-4.25674	2.233	3.61e-06	9.77e-05		gi|119569544|gb|EAW49159.1| early B-cell factor 3, isoform CRA_a, partial [Homo sapiens]	K09103	molecular_function:binding(GO:0005488);biological_process:regulation of transcription, DNA-templated(GO:0006355)
	CI01000057_05553430_05562372	-3.34307	6.27459	3.64e-06	9.84e-05		gi|1020530170|ref|XP_016104801.1| PREDICTED: metalloproteinase inhibitor 2-like isoform X1 [Sinocyclocheilus grahami]	_	_
	CI01000339_04114570_04117684	-3.41743	4.82063	3.68e-06	9.96e-05		gi|1025315015|ref|XP_016385102.1| PREDICTED: tumor necrosis factor receptor superfamily member 10B-like [Sinocyclocheilus rhinocerous]	K04722	_
	CI01000113_00160200_00207259	3.34255	6.12728	3.77e-06	0.000101799		gi|1025200097|ref|XP_016425815.1| PREDICTED: dedicator of cytokinesis protein 7-like isoform X3 [Sinocyclocheilus rhinocerous]	_	_
	CI01000013_03019688_03044233	4.29857	2.03924	3.81e-06	0.000102846		gi|966710779|gb|KTG43017.1| hypothetical protein cypCar_00004964 [Cyprinus carpio]	K06093	_
	CI01000027_02119227_02124423	-3.53111	3.85871	3.83e-06	0.000103213		gi|1020465055|ref|XP_016137447.1| PREDICTED: B-cell receptor CD22-like [Sinocyclocheilus grahami]	_	_
	CI01000020_02199397_02227367	-3.31081	7.72001	3.86e-06	0.000103988		gi|1024966367|ref|XP_016304408.1| PREDICTED: DENN domain-containing protein 5B isoform X1 [Sinocyclocheilus anshuiensis]	_	_
	CI01000037_01538390_01570296	3.29376	11.1767	3.88e-06	0.000104456		gi|1025088213|ref|XP_016341989.1| PREDICTED: fibronectin-like [Sinocyclocheilus anshuiensis]	K05717	biological_process:single organismal cell-cell adhesion(GO:0016337);molecular_function:integrin binding(GO:0005178);biological_process:endocardial cell differentiation(GO:0060956);biological_process:establishment of epithelial cell apical/basal polarity(GO:0045198);biological_process:somite specification(GO:0001757);biological_process:embryonic heart tube development(GO:0035050);biological_proces…
	CI01000306_05650597_05655729	3.44463	4.44507	3.92e-06	0.000105357		gi|777763308|gb|AJY53641.1| interleukin-1 receptor antagonist [Ctenopharyngodon idella]	_	_
	CI01000330_02272290_02277018	-4.01751	2.47228	3.96e-06	0.000106303		gi|528522003|ref|XP_005163214.1| PREDICTED: insulin gene enhancer protein isl-2a isoform X1 [Danio rerio]	K18492	biological_process:axon extension(GO:0048675);molecular_function:zinc ion binding(GO:0008270);biological_process:neuron fate specification(GO:0048665);biological_process:regulation of transcription, DNA-templated(GO:0006355);molecular_function:sequence-specific DNA binding(GO:0043565);molecular_function:sequence-specific DNA binding transcription factor activity(GO:0003700);cellular_component:nuc…
	CI01000013_11776137_11791017	-3.36888	5.16158	4.11e-06	0.000110363		gi|1025077594|ref|XP_016339100.1| PREDICTED: lipase maturation factor 2-like isoform X1 [Sinocyclocheilus anshuiensis]	_	_
	CI01000189_01832010_01841129	-3.51434	3.8435	4.14e-06	0.000110881		gi|1025305095|ref|XP_016382389.1| PREDICTED: G2/M phase-specific E3 ubiquitin-protein ligase-like [Sinocyclocheilus rhinocerous]	_	molecular_function:ubiquitin-protein transferase activity(GO:0004842);cellular_component:intracellular(GO:0005622);biological_process:cellular protein modification process(GO:0006464);molecular_function:zinc ion binding(GO:0008270)
	CI01000092_03816152_03827312	4.28211	2.024	4.15e-06	0.000111194		gi|1020574192|ref|XP_016114297.1| PREDICTED: tyrosine-protein kinase receptor UFO-like isoform X1 [Sinocyclocheilus grahami]	_	_
	CI01000029_09159075_09162036	-3.32874	6.15857	4.17e-06	0.000111514		gi|966704023|gb|KTG36264.1| hypothetical protein cypCar_00042643 [Cyprinus carpio]	_	_
	CI01053961_00000825_00001132	-3.81409	2.77793	4.17e-06	0.000111528		gi|1024946754|ref|XP_016362447.1| PREDICTED: myosin-IIIb-like [Sinocyclocheilus anshuiensis]	_	_
	CI01000030_05769783_05771898	3.7573	2.75768	4.17e-06	0.000111528		gi|528516260|ref|XP_005161791.1| PREDICTED: glutaredoxin 2 isoform X1 [Danio rerio]	K03676	biological_process:cell redox homeostasis(GO:0045454);cellular_component:cytosol(GO:0005829);biological_process:central nervous system development(GO:0007417);molecular_function:electron carrier activity(GO:0009055);molecular_function:protein disulfide oxidoreductase activity(GO:0015035)
	CI01000047_04826817_04834995	3.35901	5.11841	4.18e-06	0.000111611		gi|1025290736|ref|XP_016382866.1| PREDICTED: arf-GAP with dual PH domain-containing protein 1-like isoform X1 [Sinocyclocheilus rhinocerous]	_	_
	CI01047330_00000563_00003525	3.44653	4.07393	4.19e-06	0.000111728		gi|1025274621|ref|XP_016375557.1| PREDICTED: protein lifeguard 1-like [Sinocyclocheilus rhinocerous]<>gi|1025274625|ref|XP_016375558.1| PREDICTED: protein lifeguard 1-like [Sinocyclocheilus rhinocerous]	_	_
	CI01066296_00003122_00004429	3.85296	2.44201	4.22e-06	0.000112595		gi|966655853|gb|KTF90707.1| hypothetical protein cypCar_00048209 [Cyprinus carpio]	_	_
	CI01000338_00230859_00245194	-3.37312	5.08365	4.25e-06	0.000113197		gi|1025332120|ref|XP_016389764.1| PREDICTED: glycerol-3-phosphate acyltransferase 3-like [Sinocyclocheilus rhinocerous]	K13506	cellular_component:endoplasmic reticulum membrane(GO:0005789);molecular_function:glycerol-3-phosphate O-acyltransferase activity(GO:0004366);biological_process:triglyceride biosynthetic process(GO:0019432);biological_process:phospholipid biosynthetic process(GO:0008654);cellular_component:integral component of membrane(GO:0016021)
	CI01000251_00086675_00089603	-3.2926	7.76088	4.25e-06	0.000113197		gi|966650341|gb|KTF85251.1| hypothetical protein cypCar_00040761 [Cyprinus carpio]	K09057	_
	CI01000057_00220530_00241371	-3.57273	3.37834	4.28e-06	0.00011321		gi|795146503|ref|XP_011793685.1| PREDICTED: voltage-gated potassium channel subunit beta-2 isoform X5 [Colobus angolensis palliatus]	K04883	biological_process:protein heterooligomerization(GO:0051291);molecular_function:voltage-gated potassium channel activity(GO:0005249);cellular_component:integral component of membrane(GO:0016021);molecular_function:potassium channel regulator activity(GO:0015459);cellular_component:juxtaparanode region of axon(GO:0044224);biological_process:synaptic transmission(GO:0007268);cellular_component:cyto…
	CI01000030_01186486_01187574	8.27654	0.744876	4.28e-06	0.00011321		gi|1025278569|ref|XP_016376636.1| PREDICTED: sphingosine 1-phosphate receptor 1 [Sinocyclocheilus rhinocerous]	K04288	_
	CI01000050_01039500_01042679	8.27654	0.744876	4.28e-06	0.00011321		gi|407020532|gb|ADB96920.1| toll-like receptor 9 [Ctenopharyngodon idella]	K10161	_
	CI01000120_00477162_00480891	8.27654	0.744876	4.28e-06	0.00011321		gi|1025230119|ref|XP_016432049.1| PREDICTED: adhesive plaque matrix protein-like [Sinocyclocheilus rhinocerous]	_	_
	CI01000047_02507950_02519956	-8.23151	0.791148	4.28e-06	0.00011321		gi|1024951148|ref|XP_016296300.1| PREDICTED: neutral ceramidase [Sinocyclocheilus anshuiensis]	K12349	cellular_component:Golgi membrane(GO:0000139);cellular_component:endoplasmic reticulum membrane(GO:0005789);cellular_component:integral component of plasma membrane(GO:0005887);cellular_component:apical plasma membrane(GO:0016324);biological_process:multicellular organismal development(GO:0007275);biological_process:ceramide metabolic process(GO:0006672);molecular_function:ceramidase activity(GO:…
	CI01000075_01161238_01161465	-8.23151	0.791148	4.28e-06	0.00011321			_	_
	CI01000080_00840896_00847444	-8.23151	0.791148	4.28e-06	0.00011321		gi|1020509442|ref|XP_016093780.1| PREDICTED: urea transporter 2-like [Sinocyclocheilus grahami]	K08716	biological_process:urea transport(GO:0015840)
	CI01000039_03802776_03816031	-3.80522	2.76989	4.4e-06	0.000116333		gi|1025037856|ref|XP_016326769.1| PREDICTED: drebrin-like protein A isoform X2 [Sinocyclocheilus anshuiensis]	_	_
	CI01000340_14449294_14453161	3.27546	8.69231	4.4e-06	0.000116333		gi|1025245569|ref|XP_016367717.1| PREDICTED: cathepsin Z-like [Sinocyclocheilus rhinocerous]	K08568	_
	CI01000115_02577134_02587408	-5.37542	1.1847	4.42e-06	0.000116789			_	_
	CI01000071_00731652_00748851	4.93978	1.40912	4.47e-06	0.000117841		gi|966654186|gb|KTF89040.1| hypothetical protein cypCar_00007938, partial [Cyprinus carpio]	_	_
	CI01000214_00280486_00283091	-4.74648	1.47305	4.47e-06	0.000117841		gi|966669762|gb|KTG03143.1| hypothetical protein cypCar_00034607 [Cyprinus carpio]	_	_
	CI01000000_08962721_08970678	3.27452	8.33926	4.55e-06	0.000119862		gi|1025412154|ref|XP_016410931.1| PREDICTED: glutathione reductase-like isoform X1 [Sinocyclocheilus rhinocerous]	K00383	_
	CI01000368_00165221_00181526	-3.75557	2.85683	4.59e-06	0.000120647		gi|1024983463|ref|XP_016313472.1| PREDICTED: band 4.1-like protein 1 isoform X1 [Sinocyclocheilus anshuiensis]	_	_
	CI01000063_07525686_07551770	-3.31206	6.13371	4.61e-06	0.000121241		gi|528496386|ref|XP_005156402.1| PREDICTED: dynamin-binding protein isoform X2 [Danio rerio]	_	_
	CI01000010_03915860_03918633	3.4336	3.98266	4.65e-06	0.000122069		gi|966645734|gb|KTF80646.1| hypothetical protein cypCar_00032909 [Cyprinus carpio]	K00976	_
	CI01000340_06277603_06288451	-3.3743	4.80726	4.65e-06	0.000122138		gi|1025106312|ref|XP_016346925.1| PREDICTED: thrombopoietin receptor [Sinocyclocheilus anshuiensis]	K05082	_
	CI01000058_01280337_01289153	3.34184	5.25428	4.67e-06	0.000122469		gi|1020521331|ref|XP_016100090.1| PREDICTED: deoxyribonuclease-2-beta [Sinocyclocheilus grahami]	K01158	_
	CI01000339_04578475_04585876	-3.40738	4.58728	4.77e-06	0.000124882		gi|1025253904|ref|XP_016369975.1| PREDICTED: condensin complex subunit 2-like isoform X1 [Sinocyclocheilus rhinocerous]<>gi|1025253912|ref|XP_016369977.1| PREDICTED: condensin complex subunit 2-like isoform X1 [Sinocyclocheilus rhinocerous]	K06676	_
	CI01000027_10609852_10616902	3.35313	4.90332	4.77e-06	0.000124882		gi|118150624|ref|NP_001071274.1| uncharacterized protein LOC777768 [Danio rerio]<>gi|117558202|gb|AAI27403.1| Family with sequence similarity 46, member B [Danio rerio]	_	_
	CI01000018_01924489_01985310	-4.41336	1.69594	4.77e-06	0.000124922		gi|831280980|ref|XP_012671553.1| PREDICTED: semaphorin-5A [Clupea harengus]	K06841	_
	CI01000344_00437433_00452908	-3.33581	5.45117	4.82e-06	0.000125949		gi|1025373983|ref|XP_016398605.1| PREDICTED: E3 ubiquitin-protein ligase pellino homolog 1-like [Sinocyclocheilus rhinocerous]	K11964	_
	CI01000180_00126766_00129830	3.4204	4.08831	4.84e-06	0.00012635		gi|1025160827|ref|XP_016418223.1| PREDICTED: acetyl-coenzyme A transporter 1-like [Sinocyclocheilus rhinocerous]<>gi|1025160833|ref|XP_016418224.1| PREDICTED: acetyl-coenzyme A transporter 1-like [Sinocyclocheilus rhinocerous]<>gi|1025160837|ref|XP_016418225.1| PREDICTED: acetyl-coenzyme A transporter 1-like [Sinocyclocheilus rhinocerous]<>gi|1025160843|ref|XP_016418226.1| PREDICTED: acetyl-coenz…	K03372	biological_process:central nervous system neuron axonogenesis(GO:0021955);molecular_function:acetyl-CoA transporter activity(GO:0008521);cellular_component:integral component of membrane(GO:0016021)
	CI01000304_16232120_16237285	-4.08655	2.32501	4.87e-06	0.00012708		gi|1025075508|ref|XP_016338505.1| PREDICTED: protein eva-1 homolog C-like [Sinocyclocheilus anshuiensis]	_	_
	CI01000053_03587596_03590525	4.39995	1.82905	4.9e-06	0.000127667		gi|1025196083|ref|XP_016424744.1| PREDICTED: rano class II histocompatibility antigen, A beta chain-like [Sinocyclocheilus rhinocerous]	K06752	_
	CI01000027_10641759_10654240	-3.30403	5.79868	4.9e-06	0.000127667		gi|688591554|ref|XP_009290725.1| PREDICTED: transcription elongation factor A protein 3 isoform X12 [Danio rerio]	K03145	_
	CI01000005_03530548_03573901	3.99183	2.00716	4.93e-06	0.000128283		gi|992204509|ref|XP_015460842.1| PREDICTED: protein quaking isoform X2 [Astyanax mexicanus]	K14945	_
	CI01000340_18531560_18536515	-3.43617	4.02174	4.93e-06	0.000128283		gi|966652060|gb|KTF86962.1| hypothetical protein cypCar_00046133 [Cyprinus carpio]	K11481	molecular_function:transferase activity, transferring phosphorus-containing groups(GO:0016772)
	CI01000069_04579172_04593867	-3.28033	6.65158	4.93e-06	0.000128283		gi|1025228870|ref|XP_016431708.1| PREDICTED: ABI gene family member 3-like isoform X2 [Sinocyclocheilus rhinocerous]	_	_
	CI01000004_01302094_01304391	3.26281	7.91319	4.94e-06	0.00012842		gi|927030818|gb|ALD62537.1| peroxiredoxin 1 [Mylopharyngodon piceus]	K13279	_
	CI01000203_00184424_00196181	-3.30438	5.78668	4.95e-06	0.00012842		gi|966709403|gb|KTG41641.1| hypothetical protein cypCar_00032671, partial [Cyprinus carpio]	K09435	_
	CI01000010_08015262_08018732	-3.25067	10.5564	4.99e-06	0.000129501		gi|116517274|ref|NP_001070859.1| proto-oncogene serine/threonine-protein kinase pim-1 [Danio rerio]<>gi|115528632|gb|AAI24790.1| Zgc:153997 [Danio rerio]<>gi|182890432|gb|AAI64347.1| Zgc:153997 protein [Danio rerio]	K04702	_
	CI01000300_06873593_06881540	3.41511	4.12068	5e-06	0.000129564		gi|1024929176|ref|XP_016299413.1| PREDICTED: RNA-binding protein 47-like isoform X2 [Sinocyclocheilus anshuiensis]	_	_
	CI01000325_00664382_00671214	-3.90229	2.55057	5.06e-06	0.000130983		gi|1025372171|ref|XP_016398115.1| PREDICTED: gamma-aminobutyric acid receptor subunit rho-2-like [Sinocyclocheilus rhinocerous]	K05190	_
	CI01000321_01290633_01292869	4.91429	1.38557	5.07e-06	0.000131189			_	_
	CI01000335_00000144_00000957	-4.72416	1.45296	5.07e-06	0.000131189		gi|1020399131|ref|XP_016148661.1| PREDICTED: hemagglutinin/amebocyte aggregation factor-like [Sinocyclocheilus grahami]	_	_
	CI01000027_04424958_04434987	-3.4019	4.3527	5.16e-06	0.000133207		gi|1025276567|ref|XP_016376103.1| PREDICTED: pre-B-cell leukemia transcription factor-interacting protein 1-like isoform X2 [Sinocyclocheilus rhinocerous]	_	_
	CI01000016_03912450_03917198	3.33865	5.08206	5.18e-06	0.000133405		gi|966648709|gb|KTF83619.1| hypothetical protein cypCar_00016748 [Cyprinus carpio]	_	_
	CI01000002_00718489_00718872	8.23603	0.707624	5.19e-06	0.000133405		gi|966714944|gb|KTG47182.1| hypothetical protein cypCar_00047867 [Cyprinus carpio]	_	_
	CI01000028_08302370_08504940	8.23603	0.707624	5.19e-06	0.000133405		gi|1025409334|ref|XP_016410174.1| PREDICTED: spondin-1-like [Sinocyclocheilus rhinocerous]	_	_
	CI01000071_00544529_00545575	8.23603	0.707624	5.19e-06	0.000133405		gi|966706047|gb|KTG38288.1| hypothetical protein cypCar_00019096 [Cyprinus carpio]	K09397	_
	CI01000018_06015189_06019310	-8.19511	0.758571	5.19e-06	0.000133405		gi|1020421226|ref|XP_016129644.1| PREDICTED: chondrolectin-like [Sinocyclocheilus grahami]<>gi|1024983580|ref|XP_016313532.1| PREDICTED: chondrolectin-like [Sinocyclocheilus anshuiensis]	K10078	biological_process:axonogenesis(GO:0007409);molecular_function:carbohydrate binding(GO:0030246)
	CI01000230_00265286_00267419	-8.19511	0.758571	5.19e-06	0.000133405			_	_
	CI01000129_01008408_01011402	3.5247	3.26767	5.19e-06	0.000133405		gi|1025250851|ref|XP_016369135.1| PREDICTED: procollagen-lysine,2-oxoglutarate 5-dioxygenase 3-like, partial [Sinocyclocheilus rhinocerous]	K13646	_
	CI01000000_12018146_12030528	-3.62833	3.07702	5.26e-06	0.000135142		gi|1024977585|ref|XP_016310326.1| PREDICTED: xaa-Pro aminopeptidase 2-like [Sinocyclocheilus anshuiensis]	K14208	biological_process:cellular process(GO:0009987);molecular_function:hydrolase activity(GO:0016787)
	CI01000000_05829574_05832335	-3.8348	2.65133	5.27e-06	0.00013515		gi|1025212507|ref|XP_016429139.1| PREDICTED: protein shisa-3 homolog isoform X1 [Sinocyclocheilus rhinocerous]<>gi|1025212510|ref|XP_016429140.1| PREDICTED: protein shisa-3 homolog isoform X2 [Sinocyclocheilus rhinocerous]	_	_
	CI01000548_00011600_00016935	3.60992	3.19585	5.28e-06	0.000135453		gi|1025375340|ref|XP_016398977.1| PREDICTED: CMRF35-like molecule 3 [Sinocyclocheilus rhinocerous]	_	_
	CI01000304_05740151_05758028	-3.24917	8.18527	5.31e-06	0.00013589		gi|1025070491|ref|XP_016337123.1| PREDICTED: roquin-2-like [Sinocyclocheilus anshuiensis]	K15690	_
	CI01000030_10577987_10580431	3.33456	4.98559	5.34e-06	0.000136781		gi|1020552147|ref|XP_016109896.1| PREDICTED: natural killer cell receptor 2B4-like [Sinocyclocheilus grahami]	_	_
	CI01000043_04813811_04816237	4.38087	1.81143	5.4e-06	0.000137973			_	_
	CI01000320_01207179_01217428	-3.31295	5.44633	5.4e-06	0.000138019		gi|1020556935|ref|XP_016110851.1| PREDICTED: protein 4.1-like isoform X1 [Sinocyclocheilus grahami]	K06107	_
	CI01000050_02187334_02202572	-3.26385	6.75235	5.48e-06	0.000139839		gi|1020595922|ref|XP_016117096.1| PREDICTED: uncharacterized protein LOC107575193, partial [Sinocyclocheilus grahami]	_	_
	CI01000051_06175507_06185039	-3.53128	3.3409	5.49e-06	0.000140056		gi|1020525698|ref|XP_016102415.1| PREDICTED: synaptotagmin-like protein 3 [Sinocyclocheilus grahami]	K17598	_
	CI01000004_03133701_03141953	-3.6211	3.07049	5.5e-06	0.000140128		gi|1025170278|ref|XP_016357698.1| PREDICTED: acyl-coenzyme A thioesterase 11 isoform X1 [Sinocyclocheilus anshuiensis]	K12417	_
	CI01000012_11000305_11008211	3.35251	4.58238	5.51e-06	0.000140469		gi|1024921001|ref|XP_016348367.1| PREDICTED: sodium/potassium/calcium exchanger 3-like [Sinocyclocheilus anshuiensis]	K13751	_
	CI01000086_02018950_02030464	-3.29595	5.66319	5.53e-06	0.000140725		gi|1025202150|ref|XP_016426373.1| PREDICTED: probable palmitoyltransferase ZDHHC11 [Sinocyclocheilus rhinocerous]	K18932	_
	CI01000056_01929886_01934773	3.27562	6.10955	5.6e-06	0.00014243		gi|1024940047|ref|XP_016335187.1| PREDICTED: sulfite oxidase-like [Sinocyclocheilus anshuiensis]<>gi|1024940050|ref|XP_016335188.1| PREDICTED: sulfite oxidase-like [Sinocyclocheilus anshuiensis]<>gi|1024940052|ref|XP_016335189.1| PREDICTED: sulfite oxidase-like [Sinocyclocheilus anshuiensis]	K00387	_
	CI01000352_00574884_00583420	-3.44743	3.83634	5.71e-06	0.000145157		gi|1025130851|ref|XP_016414532.1| PREDICTED: TBC1 domain family member 15-like isoform X1 [Sinocyclocheilus rhinocerous]	_	_
	CI01000037_03800223_03800920	3.65334	2.87984	5.76e-06	0.000146109		gi|966673337|gb|KTG06718.1| hypothetical protein cypCar_00022982 [Cyprinus carpio]	K07911	_
	CI01000390_00107278_00109207	4.88835	1.36163	5.77e-06	0.000146109		gi|1025096971|ref|XP_016344374.1| PREDICTED: uncharacterized protein LOC107690531 [Sinocyclocheilus anshuiensis]	_	_
	CI01000147_00389706_00411983	-4.70149	1.43258	5.77e-06	0.000146109		gi|1025092238|ref|XP_016343096.1| PREDICTED: platelet-derived growth factor D-like isoform X2 [Sinocyclocheilus anshuiensis]	K05450	_
	CI01044552_00000001_00001219	-4.70149	1.43258	5.77e-06	0.000146109		gi|1020527895|ref|XP_016103583.1| PREDICTED: LOW QUALITY PROTEIN: nuclear anchorage protein 1-like [Sinocyclocheilus grahami]	_	_
	CI01000071_04291587_04312647	-3.55805	3.44097	5.86e-06	0.000148134		gi|1025208992|ref|XP_016428219.1| PREDICTED: cytoskeleton-associated protein 2-like [Sinocyclocheilus rhinocerous]	K16769	_
	CI01000034_01900645_01947187	3.4798	3.42554	5.86e-06	0.000148134		gi|528473914|ref|XP_001921020.3| PREDICTED: rap guanine nucleotide exchange factor-like 1 [Danio rerio]	_	_
	CI01070424_00000689_00003912	-3.44317	3.8325	5.86e-06	0.000148134		gi|966641093|gb|KTF76007.1| hypothetical protein cypCar_00043820 [Cyprinus carpio]	_	_
	CI01000319_03354708_03355063	3.61244	3.03123	6e-06	0.000151462		gi|966706713|gb|KTG38954.1| hypothetical protein cypCar_00013986, partial [Cyprinus carpio]	_	_
	CI01000093_00116357_00121990	-5.32007	1.135	6e-06	0.000151476		gi|1020395834|ref|XP_016130869.1| PREDICTED: nuclear receptor-interacting protein 1-like [Sinocyclocheilus grahami]<>gi|1020395836|ref|XP_016130878.1| PREDICTED: nuclear receptor-interacting protein 1-like [Sinocyclocheilus grahami]<>gi|1020395838|ref|XP_016130886.1| PREDICTED: nuclear receptor-interacting protein 1-like [Sinocyclocheilus grahami]<>gi|1020395840|ref|XP_016130895.1| PREDICTED: nuc…	K17965	_
	CI01000306_02881627_02896122	-3.33883	4.69662	6.01e-06	0.000151476		gi|1024954212|ref|XP_016297944.1| PREDICTED: protein NDRG3-like isoform X2 [Sinocyclocheilus anshuiensis]	_	_
	CI01000010_02821021_02827050	-3.23491	7.07063	6.16e-06	0.000155319		gi|1025220155|ref|XP_016421971.1| PREDICTED: leupaxin-like isoform X1 [Sinocyclocheilus rhinocerous]	_	_
	CI01000027_08483034_08503082	3.33154	4.5375	6.21e-06	0.0001564		gi|23308641|ref|NP_694503.1| lamin [Danio rerio]<>gi|16660150|gb|AAL27547.1|AF397016_1 nuclear lamin A [Danio rerio]	K12641	biological_process:regulation of cell aging(GO:0090342);biological_process:heart contraction(GO:0060047)
	CI01000192_00012853_00114661	3.88796	2.12478	6.23e-06	0.000156676		gi|1020398678|ref|XP_016146219.1| PREDICTED: Nance-Horan syndrome protein-like isoform X4 [Sinocyclocheilus grahami]	_	_
	CI01000142_00593244_00613363	3.23506	6.80204	6.23e-06	0.000156709		gi|1020591554|ref|XP_016116250.1| PREDICTED: guanylate-binding protein 1-like [Sinocyclocheilus grahami]	_	_
	CI01045632_00000447_00006063	-3.79558	2.61587	6.27e-06	0.000157531		gi|1024942947|ref|XP_016360654.1| PREDICTED: kelch-like protein 33 [Sinocyclocheilus anshuiensis]	_	_
	CI01000009_10477699_10485965	8.19435	0.669405	6.32e-06	0.000158092		gi|1020510559|ref|XP_016094379.1| PREDICTED: protein HEG-like isoform X1 [Sinocyclocheilus grahami]	_	_
	CI01000009_12863333_13023317	8.19435	0.669405	6.32e-06	0.000158092		gi|961838214|ref|XP_014839620.1| PREDICTED: titin [Poecilia mexicana]	K12567	_
	CI01000001_07807093_07808245	-8.15776	0.725226	6.32e-06	0.000158092			_	_
	CI01000174_00470886_00481464	-8.15776	0.725226	6.32e-06	0.000158092		gi|1024973506|ref|XP_016308262.1| PREDICTED: breast cancer anti-estrogen resistance protein 3-like isoform X2 [Sinocyclocheilus anshuiensis]	_	_
	CI01000301_01232828_01235230	-8.15776	0.725226	6.32e-06	0.000158092			_	_
	CI01000075_00093704_00094561	-3.23083	7.16563	6.33e-06	0.000158245		gi|1025402967|ref|XP_016408475.1| PREDICTED: transcription factor jun-D-like [Sinocyclocheilus rhinocerous]	K04449	molecular_function:sequence-specific DNA binding transcription factor activity(GO:0003700);molecular_function:sequence-specific DNA binding(GO:0043565);cellular_component:nucleus(GO:0005634);biological_process:regulation of transcription, DNA-templated(GO:0006355)
	CI01000444_00066503_00069599	3.43212	3.80784	6.33e-06	0.000158245		gi|966669762|gb|KTG03143.1| hypothetical protein cypCar_00034607 [Cyprinus carpio]	_	_
	CI01000047_07119977_07126126	-3.26873	5.779	6.35e-06	0.000158595		gi|1024951245|ref|XP_016296351.1| PREDICTED: dual specificity mitogen-activated protein kinase kinase 4 isoform X1 [Sinocyclocheilus anshuiensis]	K04430	biological_process:convergent extension involved in gastrulation(GO:0060027);biological_process:protein phosphorylation(GO:0006468);molecular_function:ATP binding(GO:0005524);molecular_function:protein serine/threonine kinase activity(GO:0004674)
	CI01021774_00000549_00001350	-3.33396	4.4903	6.36e-06	0.000158691		gi|1025303749|ref|XP_016382020.1| PREDICTED: semaphorin-4B-like [Sinocyclocheilus rhinocerous]	_	_
	CI01000009_03145417_03159851	-3.24049	6.38384	6.45e-06	0.000160777		gi|1025017547|ref|XP_016322864.1| PREDICTED: venom prothrombin activator omicarin-C non-catalytic subunit-like [Sinocyclocheilus anshuiensis]	K03902	_
	CI01000052_01863516_01880476	-3.20911	8.60068	6.47e-06	0.000161145		gi|1020497228|ref|XP_016087255.1| PREDICTED: sortilin-like [Sinocyclocheilus grahami]<>gi|1020497230|ref|XP_016087256.1| PREDICTED: sortilin-like [Sinocyclocheilus grahami]	K12388	_
	CI01000036_01475403_01476425	3.74019	2.48613	6.49e-06	0.000161371		gi|966705790|gb|KTG38031.1| hypothetical protein cypCar_00035012 [Cyprinus carpio]	_	_
	CI01000028_05720768_05728674	-3.25751	5.73193	6.49e-06	0.000161371		gi|966701960|gb|KTG34201.1| hypothetical protein cypCar_00021463 [Cyprinus carpio]	_	_
	CI01000288_00003704_00011169	-3.59183	3.04409	6.55e-06	0.000162732		gi|291170998|gb|ADD82676.1| immunoglobulin mu heavy chain [Ctenopharyngodon idella]	_	_
	CI01000046_03953528_03957334	3.29698	4.95154	6.6e-06	0.00016399		gi|938077790|gb|KPP74209.1| 28 kDa heat- and acid-stable phosphoprotein-like [Scleropages formosus]	_	_
	CI01000339_01369376_01372564	3.46452	3.34842	6.65e-06	0.000165011		gi|1025406741|ref|XP_016409469.1| PREDICTED: tumor necrosis factor ligand superfamily member 6-like [Sinocyclocheilus rhinocerous]	_	_
	CI01000021_03438153_03448377	4.55202	1.58326	6.66e-06	0.000165011		gi|583980961|ref|XP_006785791.1| PREDICTED: mitogen-activated protein kinase 14A-like [Neolamprologus brichardi]	K04441	_
	CI01009482_00001800_00003357	-4.35536	1.6438	6.66e-06	0.000165011		gi|966673177|gb|KTG06558.1| hypothetical protein cypCar_00010137 [Cyprinus carpio]	_	_
	CI01000318_00068957_00083764	3.87221	2.11042	6.75e-06	0.000167109		gi|1025360756|ref|XP_016402453.1| PREDICTED: tumor necrosis factor receptor superfamily member 19L-like [Sinocyclocheilus rhinocerous]<>gi|1025360760|ref|XP_016402460.1| PREDICTED: tumor necrosis factor receptor superfamily member 19L-like [Sinocyclocheilus rhinocerous]<>gi|1025360764|ref|XP_016402465.1| PREDICTED: tumor necrosis factor receptor superfamily member 19L-like [Sinocyclocheilus rhino…	K05156	_
	CI01000270_00121314_00122221	-3.73222	2.7039	6.79e-06	0.000167902		gi|1025320820|ref|XP_016386673.1| PREDICTED: heparan sulfate glucosamine 3-O-sulfotransferase 1-like [Sinocyclocheilus rhinocerous]	K01024	_
	CI01000024_03311028_03319956	-3.25842	5.64266	6.81e-06	0.000168264		gi|1025042407|ref|XP_016328020.1| PREDICTED: uncharacterized protein LOC107677592 isoform X1 [Sinocyclocheilus anshuiensis]	_	_
	CI01000086_01413340_01416793	-3.37687	4.18036	6.82e-06	0.000168521		gi|1020502184|ref|XP_016089919.1| PREDICTED: mannosyl-oligosaccharide 1,2-alpha-mannosidase IC-like isoform X1 [Sinocyclocheilus grahami]	_	_
	CI01000300_06872537_06872950	3.58707	3.00809	6.84e-06	0.000168932			_	_
	CI01000127_01092621_01093592	-3.21595	6.9105	6.94e-06	0.000171246		gi|1025141939|ref|XP_016414937.1| PREDICTED: cyclin-dependent kinase inhibitor 1B-like isoform X1 [Sinocyclocheilus rhinocerous]	K06624	biological_process:cell cycle arrest(GO:0007050);molecular_function:kinase activity(GO:0016301);biological_process:phosphorylation(GO:0016310);molecular_function:cyclin-dependent protein serine/threonine kinase inhibitor activity(GO:0004861);cellular_component:nucleus(GO:0005634)
	CI01000026_00511242_00512961	-5.29157	1.10948	7.02e-06	0.00017302			_	_
	CI01000140_01885335_01887127	3.35756	3.91365	7.11e-06	0.000175113			_	_
	CI01000030_02785349_02803666	-3.1995	7.83633	7.2e-06	0.000177174		gi|1020482098|ref|XP_016146543.1| PREDICTED: midnolin [Sinocyclocheilus grahami]<>gi|1020482100|ref|XP_016146544.1| PREDICTED: midnolin [Sinocyclocheilus grahami]<>gi|1020482102|ref|XP_016146545.1| PREDICTED: midnolin [Sinocyclocheilus grahami]<>gi|1020482104|ref|XP_016146546.1| PREDICTED: midnolin [Sinocyclocheilus grahami]	_	_
	CI01000047_01114782_01116379	3.18926	8.65347	7.21e-06	0.000177403		gi|966671680|gb|KTG05061.1| hypothetical protein cypCar_00015913 [Cyprinus carpio]	K12496	_
	CI01000015_00206441_00217247	3.22143	6.23586	7.22e-06	0.000177483		gi|1042317404|ref|XP_017306140.1| PREDICTED: mannose-1-phosphate guanyltransferase beta [Ictalurus punctatus]<>gi|1042317406|ref|XP_017306141.1| PREDICTED: mannose-1-phosphate guanyltransferase beta [Ictalurus punctatus]<>gi|1042317408|ref|XP_017306142.1| PREDICTED: mannose-1-phosphate guanyltransferase beta [Ictalurus punctatus]<>gi|1042317410|ref|XP_017306143.1| PREDICTED: mannose-1-phosphate g…	K00966	molecular_function:mannose-1-phosphate guanylyltransferase activity(GO:0004475);biological_process:biosynthetic process(GO:0009058);molecular_function:GTP binding(GO:0005525)
	CI01000004_11731995_11744636	-4.12131	1.81219	7.26e-06	0.000178198		gi|1025187697|ref|XP_016422792.1| PREDICTED: reticulophagy receptor FAM134B-like [Sinocyclocheilus rhinocerous]	_	_
	CI01000343_00987229_00990346	-3.2879	4.94215	7.26e-06	0.000178242		gi|1040694602|ref|XP_017212447.1| PREDICTED: uncharacterized protein LOC100003349 [Danio rerio]	_	_
	CI01000039_03412217_03425459	3.20438	6.98332	7.28e-06	0.000178523		gi|966671931|gb|KTG05312.1| hypothetical protein cypCar_00001044 [Cyprinus carpio]	K01868	_
	CI01000049_07806682_07825156	-3.19559	7.98407	7.3e-06	0.000178956		gi|335987405|gb|AEH76770.1| C-type lectin 2 [Ctenopharyngodon idella]<>gi|335987417|gb|AEH76776.1| C-type lectin 2 [Ctenopharyngodon idella]<>gi|339831024|gb|AEK20854.1| C-type lectin [Ctenopharyngodon idella]	_	_
	CI01000006_08797043_08827629	-4.12198	2.11071	7.32e-06	0.000179063		gi|238859643|ref|NP_001155023.1| retinoic acid receptor RXR-alpha-A [Danio rerio]	K08524	biological_process:steroid hormone mediated signaling pathway(GO:0043401);molecular_function:zinc ion binding(GO:0008270);biological_process:regulation of transcription, DNA-templated(GO:0006355);molecular_function:sequence-specific DNA binding(GO:0043565);molecular_function:sequence-specific DNA binding transcription factor activity(GO:0003700);molecular_function:steroid hormone receptor activit…
	CI01062173_00008966_00010264	-3.49428	3.2275	7.32e-06	0.000179063		gi|19702295|gb|AAL93244.1|AF487501_1 transposase [Mamestra brassicae]	_	_
	CI01000028_03334040_03380006	3.2019	7.06274	7.37e-06	0.000180231		gi|966653414|gb|KTF88316.1| hypothetical protein cypCar_00035017, partial [Cyprinus carpio]	K08117	cellular_component:integral component of membrane(GO:0016021);molecular_function:transition metal ion binding(GO:0046914);molecular_function:serine-type endopeptidase inhibitor activity(GO:0004867);molecular_function:heparin binding(GO:0008201)
	CI01000339_00376587_00383412	-4.31536	1.60795	7.46e-06	0.000182202		gi|1020603602|ref|XP_016118247.1| PREDICTED: phosphoinositide-3-kinase-interacting protein 1-like isoform X2 [Sinocyclocheilus grahami]	_	cellular_component:integral component of membrane(GO:0016021);biological_process:negative regulation of phosphatidylinositol 3-kinase activity(GO:0043553)
	CI01000043_07551619_07563172	-4.65505	1.39093	7.49e-06	0.000182627		gi|1024974264|ref|XP_016308663.1| PREDICTED: B-cadherin-like isoform X2 [Sinocyclocheilus anshuiensis]	_	_
	CI01000304_15423818_15456305	-4.65505	1.39093	7.49e-06	0.000182627		gi|1020396347|ref|XP_016133679.1| PREDICTED: lipoma HMGIC fusion partner homolog [Sinocyclocheilus grahami]	_	_
	CI01000001_12934002_12952770	-3.46058	3.5592	7.51e-06	0.000183155		gi|1025211812|ref|XP_016428949.1| PREDICTED: eyes absent homolog 4-like isoform X13 [Sinocyclocheilus rhinocerous]	K17622	_
	CI01000339_01125117_01140044	-3.31555	4.37771	7.61e-06	0.000185356		gi|1020477069|ref|XP_016143851.1| PREDICTED: adrenodoxin-like [Sinocyclocheilus grahami]	_	_
	CI01000184_00089016_00094624	-3.6603	2.77083	7.66e-06	0.000186508		gi|1025181665|ref|XP_016421714.1| PREDICTED: intestinal mucin-like protein [Sinocyclocheilus rhinocerous]	_	_
	CI01000049_08056071_08059039	3.26985	4.927	7.71e-06	0.000187364		gi|50540424|ref|NP_001002678.1| mitochondrial import inner membrane translocase subunit Tim10 [Danio rerio]<>gi|1020400610|ref|XP_016088703.1| PREDICTED: mitochondrial import inner membrane translocase subunit Tim10 [Sinocyclocheilus grahami]<>gi|1024978196|ref|XP_016310652.1| PREDICTED: mitochondrial import inner membrane translocase subunit Tim10 [Sinocyclocheilus anshuiensis]<>gi|1025367456|re…	_	molecular_function:metal ion binding(GO:0046872);biological_process:protein import into mitochondrial inner membrane(GO:0045039);cellular_component:mitochondrial inner membrane(GO:0005743)
	CI01000001_04085864_04225894	-8.11942	0.691079	7.72e-06	0.000187364		gi|1042290173|ref|XP_017342048.1| PREDICTED: LOW QUALITY PROTEIN: plexin-A2 [Ictalurus punctatus]	K06820	_
	CI01000026_07070470_07091280	-8.11942	0.691079	7.72e-06	0.000187364		gi|966668510|gb|KTG01891.1| hypothetical protein cypCar_00013437 [Cyprinus carpio]	K13887	_
	CI01000306_07836379_07838734	-8.11942	0.691079	7.72e-06	0.000187364			_	_
	CI01000129_01319076_01332232	3.58235	2.91254	7.78e-06	0.000188637		gi|966670482|gb|KTG03863.1| hypothetical protein cypCar_00023785 [Cyprinus carpio]	_	_
	CI01000063_06641523_06649617	3.26659	4.84533	7.8e-06	0.000189019		gi|1020502808|ref|XP_016090247.1| PREDICTED: ETS translocation variant 4 isoform X2 [Sinocyclocheilus grahami]	K15592	_
	CI01000029_00238295_00240090	-3.81686	2.47338	7.85e-06	0.000190062		gi|1025376837|ref|XP_016399384.1| PREDICTED: tumor necrosis factor receptor superfamily member 21-like [Sinocyclocheilus rhinocerous]	K05157	_
	CI01000072_04992647_05006768	-3.17996	8.25484	7.89e-06	0.000190861		gi|1025070212|ref|XP_016337046.1| PREDICTED: protein phosphatase Slingshot homolog 2-like isoform X1 [Sinocyclocheilus anshuiensis]	K05766	_
	CI01000027_05612215_05613339	3.18751	6.92777	8.12e-06	0.000196389		gi|966640444|gb|KTF75358.1| hypothetical protein cypCar_00033286 [Cyprinus carpio]	K04245	_
	CI01000343_01120612_01125380	3.77495	2.2068	8.14e-06	0.000196598		gi|966647170|gb|KTF82080.1| hypothetical protein cypCar_00048914 [Cyprinus carpio]	_	_
	CI01000026_11792044_11807684	-3.32411	4.24656	8.18e-06	0.000197588		gi|1020461370|ref|XP_016135471.1| PREDICTED: condensin-2 complex subunit G2 [Sinocyclocheilus grahami]	K11492	_
	CI01000006_09192219_09195918	-3.50063	3.14841	8.22e-06	0.000198006		gi|1025079213|ref|XP_016339538.1| PREDICTED: zinc finger protein Gfi-1b-like [Sinocyclocheilus anshuiensis]	K09223	_
	CI01000030_04362878_04366419	5.44653	1.01087	8.23e-06	0.000198006		gi|1025039607|ref|XP_016327253.1| PREDICTED: phospholipid phosphatase 2-like [Sinocyclocheilus anshuiensis]	K01080	_
	CI01000115_02124660_02136912	5.44653	1.01087	8.23e-06	0.000198006		gi|1020405589|ref|XP_016114415.1| PREDICTED: transcriptional enhancer factor TEF-1 [Sinocyclocheilus grahami]<>gi|1020405591|ref|XP_016114421.1| PREDICTED: transcriptional enhancer factor TEF-1 [Sinocyclocheilus grahami]<>gi|1020405593|ref|XP_016114428.1| PREDICTED: transcriptional enhancer factor TEF-1 [Sinocyclocheilus grahami]<>gi|1025077918|ref|XP_016339187.1| PREDICTED: transcriptional enhan…	K09448	molecular_function:sequence-specific DNA binding transcription factor activity(GO:0003700);biological_process:hippo signaling(GO:0035329);cellular_component:nucleus(GO:0005634);biological_process:regulation of transcription, DNA-templated(GO:0006355)
	CI01000005_05769088_05775489	-5.26251	1.08349	8.23e-06	0.000198006		gi|1025220319|ref|XP_016422443.1| PREDICTED: uncharacterized protein YMR317W-like isoform X1 [Sinocyclocheilus rhinocerous]	_	_
	CI01000320_03653954_03661389	-3.19772	6.32952	8.3e-06	0.000199547		gi|50233771|ref|NP_571140.1| nuclear receptor subfamily 1 group D member 2 [Danio rerio]<>gi|49257184|gb|AAH74065.1| Nuclear receptor subfamily 1, group D, member 2b [Danio rerio]<>gi|182890554|gb|AAI64697.1| Nr1d2b protein [Danio rerio]	K08531	molecular_function:metal ion binding(GO:0046872);molecular_function:DNA binding(GO:0003677);biological_process:regulation of cellular process(GO:0050794);biological_process:transcription, DNA-templated(GO:0006351)
	CI01000026_12536781_12546106	-4.29494	1.58968	8.36e-06	0.000200894		gi|1020461419|ref|XP_016135497.1| PREDICTED: kinesin-like protein KIF9 [Sinocyclocheilus grahami]	K10397	_
	CI01000304_14179009_14221165	-4.29494	1.58968	8.36e-06	0.000200894		gi|688574595|ref|XP_009303676.1| PREDICTED: disks large homolog 2 isoform X1 [Danio rerio]	K12075	_
	CI01000044_00152627_00154457	4.16126	1.9126	8.39e-06	0.000201349		gi|1025313888|ref|XP_016384790.1| PREDICTED: leukocyte elastase inhibitor-like isoform X1 [Sinocyclocheilus rhinocerous]	K13963	_
	CI01000066_00109609_00131845	-3.19273	6.50406	8.41e-06	0.000201804		gi|1024957089|ref|XP_016299470.1| PREDICTED: calcium/calmodulin-dependent protein kinase type 1D-like [Sinocyclocheilus anshuiensis]	K08794	_
	CI01000145_00726116_00726772	3.63096	2.64231	8.49e-06	0.000203385		gi|1020412063|ref|XP_016124743.1| PREDICTED: zinc finger CCHC domain-containing protein 14-like [Sinocyclocheilus grahami]	_	_
	CI01000304_05173869_05175309	-3.45098	3.26867	8.55e-06	0.000204066		gi|31377821|ref|NP_852472.1| notch-regulated ankyrin repeat-containing protein A [Danio rerio]<>gi|1024963328|ref|XP_016302792.1| PREDICTED: notch-regulated ankyrin repeat-containing protein A [Sinocyclocheilus anshuiensis]<>gi|1025123738|ref|XP_016413257.1| PREDICTED: notch-regulated ankyrin repeat-containing protein A [Sinocyclocheilus rhinocerous]<>gi|82208377|sp|Q7T3Y0.1|NARPA_DANRE RecName: …	_	biological_process:pigment cell differentiation(GO:0050931);biological_process:regulation of cell-cell adhesion(GO:0022407);biological_process:regulation of transcription, DNA-templated(GO:0006355);biological_process:blood vessel endothelial cell proliferation involved in sprouting angiogenesis(GO:0002043);biological_process:Notch signaling pathway(GO:0007219);biological_process:neural crest cell…
	CI01000016_03895417_03896392	4.83503	1.31255	8.55e-06	0.000204066		gi|966648709|gb|KTF83619.1| hypothetical protein cypCar_00016748 [Cyprinus carpio]	_	_
	CI01000054_09761729_09811401	-4.63125	1.36964	8.55e-06	0.000204066		gi|1025101453|ref|XP_016345597.1| PREDICTED: adenylate cyclase type 2-like isoform X3 [Sinocyclocheilus anshuiensis]	K08042	biological_process:intracellular signal transduction(GO:0035556);molecular_function:adenylate cyclase activity(GO:0004016);biological_process:cyclic nucleotide biosynthetic process(GO:0009190);cellular_component:integral component of membrane(GO:0016021);molecular_function:nucleotide binding(GO:0000166)
	CI01000179_00618398_00629398	-4.63125	1.36964	8.55e-06	0.000204066		gi|1025326500|ref|XP_016388201.1| PREDICTED: estradiol 17-beta-dehydrogenase 2-like [Sinocyclocheilus rhinocerous]	K13368	_
	CI01000300_09093955_09134495	-4.63125	1.36964	8.55e-06	0.000204066		gi|1025218143|ref|XP_016430626.1| PREDICTED: protein FAM184B-like isoform X3 [Sinocyclocheilus rhinocerous]	_	_
	CI01000324_01473716_01505928	-4.63125	1.36964	8.55e-06	0.000204066		gi|1025347769|ref|XP_016393963.1| PREDICTED: thyrotropin receptor-like [Sinocyclocheilus rhinocerous]	K04249	_
	CI01000300_01963369_01973641	-3.27155	4.6627	8.61e-06	0.000205323		gi|1025107491|ref|XP_016347259.1| PREDICTED: protein CASC5 [Sinocyclocheilus anshuiensis]<>gi|1025107495|ref|XP_016347260.1| PREDICTED: protein CASC5 [Sinocyclocheilus anshuiensis]<>gi|1025107499|ref|XP_016347262.1| PREDICTED: protein CASC5 [Sinocyclocheilus anshuiensis]	K11542	_
	CI01000013_07119401_07124434	-3.25513	4.74991	8.81e-06	0.000209818		gi|1024997550|ref|XP_016318163.1| PREDICTED: teashirt homolog 3-like [Sinocyclocheilus anshuiensis]	K09236	_
	CI01000339_03192684_03218127	-3.19603	5.95895	8.83e-06	0.00021019		gi|1025007988|ref|XP_016322481.1| PREDICTED: transmembrane protein 2 [Sinocyclocheilus anshuiensis]	_	biological_process:endocardial cushion development(GO:0003197);biological_process:cell migration involved in heart formation(GO:0060974);biological_process:heart looping(GO:0001947);biological_process:cell migration to the midline involved in heart development(GO:0003318);biological_process:atrioventricular valve formation(GO:0003190);cellular_component:integral component of membrane(GO:0016021)
	CI01000098_02886335_02890733	3.26595	4.69569	8.83e-06	0.00021019		gi|1025316016|ref|XP_016385380.1| PREDICTED: guanylate-binding protein 1-like [Sinocyclocheilus rhinocerous]	_	molecular_function:GTPase activity(GO:0003924);molecular_function:GTP binding(GO:0005525)
	CI01000050_02230904_02233429	-3.27598	4.43815	8.87e-06	0.000211011		gi|1020595922|ref|XP_016117096.1| PREDICTED: uncharacterized protein LOC107575193, partial [Sinocyclocheilus grahami]	_	_
	CI01000000_12563108_12564521	-4.08574	1.78037	8.88e-06	0.000211079		gi|1024993447|ref|XP_016316654.1| PREDICTED: forkhead box protein I1-like [Sinocyclocheilus anshuiensis]	K09401	_
	CI01000012_10934571_10937915	-3.17575	6.69135	8.96e-06	0.00021264		gi|1024921005|ref|XP_016348574.1| PREDICTED: cyclic GMP-AMP synthase [Sinocyclocheilus anshuiensis]	K17834	_
	CI01002562_00000078_00000729	3.61992	2.63227	8.98e-06	0.000213068		gi|1020492166|ref|XP_016084523.1| PREDICTED: annexin A5-like [Sinocyclocheilus grahami]	_	_
	CI01000310_02572928_02575251	-3.17966	6.49931	9.01e-06	0.000213666		gi|1024928200|ref|XP_016295864.1| PREDICTED: F-box only protein 30-like isoform X1 [Sinocyclocheilus anshuiensis]<>gi|1024928203|ref|XP_016295871.1| PREDICTED: F-box only protein 30-like isoform X2 [Sinocyclocheilus anshuiensis]	K10307	_
	CI01000206_00000045_00001349	3.40932	3.2984	9.19e-06	0.000217691		gi|1025030731|ref|XP_016324835.1| PREDICTED: interleukin-1 receptor-like 1 [Sinocyclocheilus anshuiensis]	_	_
	CI01180000_09106473_09108762	3.29134	4.36445	9.23e-06	0.000218536		gi|1020424517|ref|XP_016131293.1| PREDICTED: desumoylating isopeptidase 2 [Sinocyclocheilus grahami]<>gi|1024984798|ref|XP_016314163.1| PREDICTED: desumoylating isopeptidase 2 [Sinocyclocheilus anshuiensis]	_	cellular_component:cytoplasm(GO:0005737);biological_process:proteolysis(GO:0006508);biological_process:convergent extension involved in gastrulation(GO:0060027);molecular_function:peptidase activity(GO:0008233)
	CI01000189_03573515_03603610	3.51727	3.03041	9.34e-06	0.000220543		gi|1025379589|ref|XP_016400116.1| PREDICTED: rho GTPase-activating protein 5-like [Sinocyclocheilus rhinocerous]	K13709	_
	CI01000300_02582812_02584177	3.51727	3.03041	9.34e-06	0.000220543		gi|966643107|gb|KTF78019.1| hypothetical protein cypCar_00028198 [Cyprinus carpio]	K01047	_
	CI01000368_00035912_00069341	-3.50046	3.05815	9.34e-06	0.000220543		gi|923791669|ref|XP_013764676.1| PREDICTED: band 4.1-like protein 1 [Pundamilia nyererei]	K06107	_
	CI01000288_00029004_00039721	-4.27422	1.57117	9.39e-06	0.000221379		gi|966702131|gb|KTG34372.1| hypothetical protein cypCar_00050059 [Cyprinus carpio]	_	_
	CI01063481_00001605_00001871	-4.27422	1.57117	9.39e-06	0.000221379		gi|966669025|gb|KTG02406.1| hypothetical protein cypCar_00007287 [Cyprinus carpio]	K07527	molecular_function:protein tyrosine kinase activity(GO:0004713);biological_process:peptidyl-tyrosine phosphorylation(GO:0018108);molecular_function:ATP binding(GO:0005524)
	CI01000327_00086889_00174897	-3.58878	2.82706	9.45e-06	0.000222528		gi|972986664|ref|XP_015209399.1| PREDICTED: myosin-IIIa isoform X4 [Lepisosteus oculatus]	K08834	cellular_component:myosin complex(GO:0016459);molecular_function:protein kinase activity(GO:0004672);biological_process:protein phosphorylation(GO:0006468);molecular_function:ATP binding(GO:0005524);molecular_function:motor activity(GO:0003774)
	CI01000054_02439354_02469735	-3.21025	5.2561	9.47e-06	0.000222699		gi|1025317825|ref|XP_016385871.1| PREDICTED: neurabin-1-like isoform X2 [Sinocyclocheilus rhinocerous]	K17551	_
	CI01000030_10567314_10570556	8.1072	0.589853	9.48e-06	0.000222699		gi|1020599231|ref|XP_016117711.1| PREDICTED: uncharacterized protein LOC107575914 isoform X1 [Sinocyclocheilus grahami]	_	_
	CI01000325_05526039_05530187	8.1072	0.589853	9.48e-06	0.000222699		gi|966708604|gb|KTG40842.1| hypothetical protein cypCar_00001586 [Cyprinus carpio]	_	_
	CI01000001_13405095_13420029	-3.14588	8.37151	9.48e-06	0.000222699		gi|1025325648|ref|XP_016387968.1| PREDICTED: general receptor for phosphoinositides 1-associated scaffold protein-like [Sinocyclocheilus rhinocerous]	_	_
	CI01000340_19115929_19119348	-3.14676	8.12437	9.49e-06	0.000222756		gi|1026691661|gb|AND46800.1| DNA-damage-inducible transcript 3 [Ctenopharyngodon idella]	_	_
	CI01000034_03407574_03419313	-3.2355	4.78069	9.51e-06	0.000223006		gi|1025048833|ref|XP_016329790.1| PREDICTED: protein FAM117A-like isoform X1 [Sinocyclocheilus anshuiensis]	_	_
	CI01000010_00964665_01011716	-3.2214	5.02858	9.55e-06	0.000223857		gi|1025144063|ref|XP_016415325.1| PREDICTED: nucleolar protein 4-like [Sinocyclocheilus rhinocerous]	_	_
	CI01000310_00631552_00635392	3.37881	3.50856	9.65e-06	0.000225683		gi|1024974492|ref|XP_016308785.1| PREDICTED: cardiolipin synthase (CMP-forming)-like isoform X1 [Sinocyclocheilus anshuiensis]	K08744	_
	CI01000073_00835943_00849810	5.41268	0.979871	9.66e-06	0.000225683		gi|1025155584|ref|XP_016355018.1| PREDICTED: signal-transducing adaptor protein 2-like [Sinocyclocheilus anshuiensis]	_	_
	CI01000343_00000049_00008777	5.41268	0.979871	9.66e-06	0.000225683		gi|1025141615|ref|XP_016414878.1| PREDICTED: B-cell receptor CD22-like, partial [Sinocyclocheilus rhinocerous]	_	_
	CI01020888_00001001_00002762	-5.23284	1.05702	9.66e-06	0.000225683		gi|1025285821|ref|XP_016378586.1| PREDICTED: rho GTPase-activating protein 6-like isoform X1 [Sinocyclocheilus rhinocerous]	_	_
	CI01052153_00000082_00000528	-5.23284	1.05702	9.66e-06	0.000225683		gi|1020411054|ref|XP_016124196.1| PREDICTED: carboxypeptidase N subunit 2-like isoform X1 [Sinocyclocheilus grahami]<>gi|1020411056|ref|XP_016124197.1| PREDICTED: carboxypeptidase N subunit 2-like isoform X2 [Sinocyclocheilus grahami]	_	_
	CI01000006_06809736_06812112	3.15384	6.85598	9.7e-06	0.000226323		gi|156571774|gb|ABU84814.1| transforming growth factor beta 1 [Ctenopharyngodon idella]	K13375	_
	CI01000082_02041993_02050233	3.14016	8.06593	9.81e-06	0.000228626		gi|966704245|gb|KTG36486.1| hypothetical protein cypCar_00003193 [Cyprinus carpio]	K01953	_
	CI01000028_00710081_00723407	-3.14809	7.39696	9.82e-06	0.000228673		gi|973212482|ref|XP_015192990.1| PREDICTED: protein C-ets-1 isoform X1 [Lepisosteus oculatus]	K02678	_
	CI01000021_00336727_00346126	3.17354	5.93913	9.83e-06	0.000228684			_	_
	CI01000322_00125564_00126829	-3.38646	3.61516	9.84e-06	0.000228713		gi|1020523232|ref|XP_016101110.1| PREDICTED: probable G-protein coupled receptor 19 [Sinocyclocheilus grahami]<>gi|1020523234|ref|XP_016101111.1| PREDICTED: probable G-protein coupled receptor 19 [Sinocyclocheilus grahami]	K04316	_
	CI01000439_00026526_00032402	4.26077	1.70098	9.85e-06	0.00022879		gi|1025145028|ref|XP_016354149.1| PREDICTED: septin-8-like isoform X1 [Sinocyclocheilus anshuiensis]	K16940	molecular_function:GTP binding(GO:0005525);biological_process:cell cycle(GO:0007049);cellular_component:septin complex(GO:0031105)
	CI01000152_00562189_00571618	-3.13709	8.43998	9.94e-06	0.000230871		gi|1025316069|ref|XP_016385395.1| PREDICTED: cAMP-responsive element modulator-like isoform X1 [Sinocyclocheilus rhinocerous]	K09052	_
	CI01000057_04218508_04219283	-3.13848	8.08783	9.95e-06	0.000230871		gi|1025057086|ref|XP_016331979.1| PREDICTED: growth arrest and DNA damage-inducible protein GADD45 beta-like [Sinocyclocheilus anshuiensis]<>gi|1025138904|ref|XP_016417061.1| PREDICTED: growth arrest and DNA damage-inducible protein GADD45 beta-like [Sinocyclocheilus rhinocerous]	K04402	_
	CI01000080_01732531_01763618	-3.32562	4.05312	9.98e-06	0.000231434		gi|1020502364|ref|XP_016090014.1| PREDICTED: potassium channel subfamily T member 1-like [Sinocyclocheilus grahami]	K04946	_
	CI01000063_01103201_01112981	-3.25924	4.54191	1.01e-05	0.000234463		gi|966649905|gb|KTF84815.1| hypothetical protein cypCar_00026939 [Cyprinus carpio]	K16804	_
	CI01000001_13309045_13319725	-4.06434	2.0587	1.02e-05	0.000235778		gi|1025002648|ref|XP_016320311.1| PREDICTED: myosin light chain kinase 2, skeletal/cardiac muscle-like isoform X1 [Sinocyclocheilus anshuiensis]	K00907	_
	CI01000016_02884294_02912568	3.79079	2.03641	1.02e-05	0.000235778		gi|1025222408|ref|XP_016427906.1| PREDICTED: MAP7 domain-containing protein 1-like isoform X2 [Sinocyclocheilus rhinocerous]	K16806	_
	CI01000039_06240103_06241511	3.3965	3.22071	1.03e-05	0.000239232		gi|688573412|ref|XP_009303434.1| PREDICTED: uncharacterized protein si:dkey-27b3.4 [Danio rerio]	_	_
	CI01000115_01942605_01975616	3.17149	5.59581	1.04e-05	0.000240677		gi|1020405558|ref|XP_016114315.1| PREDICTED: liprin-beta-2-like isoform X5 [Sinocyclocheilus grahami]	_	_
	CI01000049_00239838_00240443	3.47144	3.14647	1.04e-05	0.000241052		gi|1024986190|ref|XP_016314877.1| PREDICTED: ras-related protein Rab-9A-like [Sinocyclocheilus anshuiensis]	K07925	_
	CI01000024_02890130_02920901	-4.2532	1.55242	1.06e-05	0.000243678		gi|1025233059|ref|XP_016364290.1| PREDICTED: unconventional myosin-X-like [Sinocyclocheilus rhinocerous]	K12559	_
	CI01000010_06954712_06970665	3.15546	6.21352	1.06e-05	0.000243745		gi|93117589|gb|ABE99697.1| TNF receptor associated factor 1 [Ctenopharyngodon idella]	K03172	_
	CI01000001_13297434_13300865	3.38091	3.27272	1.06e-05	0.000245281		gi|1020576248|ref|XP_016114704.1| PREDICTED: trafficking protein particle complex subunit 6B [Sinocyclocheilus grahami]<>gi|1025002717|ref|XP_016320347.1| PREDICTED: trafficking protein particle complex subunit 6B [Sinocyclocheilus anshuiensis]<>gi|1025325527|ref|XP_016387942.1| PREDICTED: trafficking protein particle complex subunit 6B [Sinocyclocheilus rhinocerous]	_	_
	CI01000013_02859975_02863496	3.58626	2.60172	1.07e-05	0.00024559		gi|1020475989|ref|XP_016143260.1| PREDICTED: transmembrane protein 170A-like [Sinocyclocheilus grahami]	_	_
	CI01000051_04165819_04167331	3.16366	5.84743	1.07e-05	0.000246989		gi|1024978827|ref|XP_016310987.1| PREDICTED: proteasome subunit alpha type-6 isoform X1 [Sinocyclocheilus anshuiensis]<>gi|1025410476|ref|XP_016410476.1| PREDICTED: proteasome subunit alpha type-6-like isoform X1 [Sinocyclocheilus rhinocerous]	K02730	_
	CI01000301_01756221_01772903	-3.76077	2.42294	1.09e-05	0.00025001		gi|221219216|gb|ACM08269.1| Tetraspanin-1 [Salmo salar]<>gi|223647054|gb|ACN10285.1| Tetraspanin-1 [Salmo salar]<>gi|223672923|gb|ACN12643.1| Tetraspanin-1 [Salmo salar]	_	_
	CI01035324_00000157_00000861	-4.04928	1.74782	1.09e-05	0.0002508		gi|1020448400|ref|XP_016132974.1| PREDICTED: sorting nexin-25-like [Sinocyclocheilus grahami]	K17887	_
	CI01000027_05061061_05063086	4.1062	1.86213	1.11e-05	0.000253706		gi|966698983|gb|KTG31224.1| hypothetical protein cypCar_00041879 [Cyprinus carpio]	K04524	_
	CI01000344_01645893_01646501	4.1062	1.86213	1.11e-05	0.000253706		gi|1020472076|ref|XP_016141186.1| PREDICTED: E3 ubiquitin-protein ligase RNF152-like [Sinocyclocheilus grahami]	_	_
	CI01000004_07172745_07186598	-3.42067	3.1615	1.13e-05	0.00025929		gi|1020395258|ref|XP_016127856.1| PREDICTED: phosphatidylinositol 5-phosphate 4-kinase type-2 alpha-like isoform X1 [Sinocyclocheilus grahami]<>gi|1025320401|ref|XP_016386558.1| PREDICTED: phosphatidylinositol 5-phosphate 4-kinase type-2 alpha-like isoform X1 [Sinocyclocheilus rhinocerous]	K00920	_
	CI01000081_01137104_01147739	-3.14359	6.16524	1.14e-05	0.000262092		gi|1025114546|ref|XP_016393169.1| PREDICTED: integrin alpha-X-like [Sinocyclocheilus rhinocerous]	_	_
	CI01000009_01061214_01063408	3.63901	2.39413	1.16e-05	0.000265733		gi|1025308194|ref|XP_016383258.1| PREDICTED: Krueppel-like factor 5 [Sinocyclocheilus rhinocerous]<>gi|1025308198|ref|XP_016383259.1| PREDICTED: Krueppel-like factor 5 [Sinocyclocheilus rhinocerous]	K09206	_
	CI01000020_07029337_07034375	3.26327	4.01951	1.17e-05	0.000265733		gi|1025255081|ref|XP_016370295.1| PREDICTED: phosphoacetylglucosamine mutase isoform X2 [Sinocyclocheilus rhinocerous]	K01836	_
	CI01180000_04375200_04414909	-3.20117	4.88606	1.17e-05	0.000265733		gi|1040660923|ref|XP_017214242.1| PREDICTED: sodium bicarbonate transporter-like protein 11 isoform X4 [Danio rerio]	K13862	molecular_function:inorganic anion exchanger activity(GO:0005452);biological_process:anion transport(GO:0006820);biological_process:phosphoenolpyruvate-dependent sugar phosphotransferase system(GO:0009401);molecular_function:sugar:proton symporter activity(GO:0005351);cellular_component:integral component of membrane(GO:0016021)
	CI01000050_03759473_03767344	8.06156	0.548404	1.17e-05	0.000265733		gi|966706685|gb|KTG38926.1| hypothetical protein cypCar_00034827 [Cyprinus carpio]	_	_
	CI01000051_04199737_04203141	8.06156	0.548404	1.17e-05	0.000265733		gi|1020605581|ref|XP_016118621.1| PREDICTED: protein FAM177A1-like isoform X1 [Sinocyclocheilus grahami]	_	_
	CI01000306_05506906_05508492	8.06156	0.548404	1.17e-05	0.000265733		gi|966692917|gb|KTG25576.1| hypothetical protein cypCar_00020617 [Cyprinus carpio]	_	_
	CI01000321_02656580_02666438	8.06156	0.548404	1.17e-05	0.000265733		gi|1024958004|ref|XP_016299955.1| PREDICTED: plectin-like [Sinocyclocheilus anshuiensis]	_	_
	CI01000304_11170412_11182604	-8.03955	0.62021	1.17e-05	0.000265733		gi|966659655|gb|KTF94509.1| hypothetical protein cypCar_00002279 [Cyprinus carpio]	K13863	_
	CI01035488_00001596_00005638	-8.03955	0.62021	1.17e-05	0.000265733		gi|1039360580|ref|XP_017162645.1| PREDICTED: uncharacterized protein LOC108166655 [Poecilia reticulata]	_	_
	CI01000020_01745382_01768397	-3.24298	4.27912	1.18e-05	0.000268819		gi|1025129097|ref|XP_016414224.1| PREDICTED: LOW QUALITY PROTEIN: lymphoid-restricted membrane protein-like [Sinocyclocheilus rhinocerous]	_	_
	CI01000000_07927871_07930406	-4.23186	1.53342	1.19e-05	0.000270201			_	_
	CI01156070_00000074_00001654	-3.29212	4.02308	1.19e-05	0.000270631		gi|1040678511|ref|XP_017208958.1| PREDICTED: serine/threonine-protein kinase 38 [Danio rerio]	K08790	_
	CI01000012_13538979_13549803	-3.91985	2.17445	1.19e-05	0.000270732		gi|1020487890|ref|XP_016149619.1| PREDICTED: DNA replication ATP-dependent helicase/nuclease DNA2-like [Sinocyclocheilus grahami]	K10742	_
	CI01000146_01118482_01121194	3.71427	2.15175	1.19e-05	0.000270732		gi|1025405177|ref|XP_016409060.1| PREDICTED: E3 ubiquitin-protein ligase NEURL3-like [Sinocyclocheilus rhinocerous]	_	_
	CI01045512_00002127_00002770	-3.6254	2.6079	1.2e-05	0.000271305		gi|1024975638|ref|XP_016309296.1| PREDICTED: putative nuclease HARBI1 [Sinocyclocheilus anshuiensis]	_	_
	CI01000329_00964720_00979084	3.56338	2.581	1.2e-05	0.000271305		gi|1024984841|ref|XP_016314188.1| PREDICTED: ankyrin repeat and fibronectin type-III domain-containing protein 1-like [Sinocyclocheilus anshuiensis]	_	_
	CI01000254_00220929_00229133	3.25609	3.97684	1.2e-05	0.000272337		gi|1020566915|ref|XP_016112854.1| PREDICTED: apolipoprotein L3-like isoform X1 [Sinocyclocheilus grahami]	_	_
	CI01151226_00000072_00000512	-4.03463	2.03197	1.21e-05	0.000272822		gi|1020416026|ref|XP_016126872.1| PREDICTED: proteinase-activated receptor 1-like [Sinocyclocheilus grahami]	_	_
	CI01000049_06796385_06798395	3.75688	2.00572	1.21e-05	0.000272822		gi|966705814|gb|KTG38055.1| hypothetical protein cypCar_00037940 [Cyprinus carpio]	_	_
	CI01000095_00740485_00753498	3.8306	1.86058	1.22e-05	0.000274492		gi|1025220932|ref|XP_016423970.1| PREDICTED: FH2 domain-containing protein 1-like [Sinocyclocheilus rhinocerous]	_	_
	CI01000300_09136541_09152739	-3.20609	4.63017	1.22e-05	0.00027486		gi|1025168561|ref|XP_016357397.1| PREDICTED: condensin complex subunit 3-like isoform X1 [Sinocyclocheilus anshuiensis]	K06678	cellular_component:cytoplasm(GO:0005737);cellular_component:condensin complex(GO:0000796);biological_process:mitotic chromosome condensation(GO:0007076)
	CI01000302_00045349_00078600	-3.10631	7.55506	1.23e-05	0.000276747		gi|1020571614|ref|XP_016113780.1| PREDICTED: ATP-binding cassette sub-family A member 1-like isoform X3 [Sinocyclocheilus grahami]	K05641	_
	CI01000000_05754551_05762914	3.09227	9.72378	1.23e-05	0.000277697		gi|1025212484|ref|XP_016429132.1| PREDICTED: EH domain-containing protein 1-like [Sinocyclocheilus rhinocerous]	K12483	_
	CI01000340_04491232_04534682	-3.09005	9.807	1.25e-05	0.000281153		gi|1025106118|ref|XP_016346874.1| PREDICTED: cAMP-specific 3',5'-cyclic phosphodiesterase 4B-like isoform X1 [Sinocyclocheilus anshuiensis]	K13293	_
	CI01000018_04843213_04852105	-3.09853	8.12912	1.25e-05	0.000281153		gi|966703436|gb|KTG35677.1| hypothetical protein cypCar_00000057 [Cyprinus carpio]	_	_
	CI01000130_01650215_01665219	-3.50003	2.85862	1.26e-05	0.000283629		gi|1024956821|ref|XP_016299323.1| PREDICTED: cytosolic 10-formyltetrahydrofolate dehydrogenase-like [Sinocyclocheilus anshuiensis]	K00289	_
	CI01000445_00004969_00017998	-3.20054	4.77297	1.26e-05	0.000284012		gi|1025123381|ref|XP_016413190.1| PREDICTED: receptor-type tyrosine-protein phosphatase eta-like isoform X1 [Sinocyclocheilus rhinocerous]	K05698	_
	CI01000398_00072700_00075351	-3.35483	3.52684	1.27e-05	0.000284929		gi|966640628|gb|KTF75542.1| hypothetical protein cypCar_00031982, partial [Cyprinus carpio]	_	_
	CI01000306_01927392_02010649	3.12861	5.92539	1.27e-05	0.000285302		gi|1025139148|ref|XP_016417395.1| PREDICTED: filamin-B isoform X1 [Sinocyclocheilus rhinocerous]<>gi|1025139153|ref|XP_016417405.1| PREDICTED: filamin-B isoform X2 [Sinocyclocheilus rhinocerous]	K04437	_
	CI01000299_02761916_02788258	-3.10493	6.90438	1.28e-05	0.000287005		gi|1025178262|ref|XP_016420797.1| PREDICTED: fibronectin-like isoform X2 [Sinocyclocheilus rhinocerous]	K05717	_
	CI01000065_02856492_02888060	-3.10562	7.06218	1.28e-05	0.000287005		gi|1025214738|ref|XP_016429736.1| PREDICTED: type II inositol 1,4,5-trisphosphate 5-phosphatase [Sinocyclocheilus rhinocerous]	K01099	_
	CI01000009_08444920_08447297	-3.23277	4.23574	1.29e-05	0.000287927		gi|1020508424|ref|XP_016093244.1| PREDICTED: glycophorin-C-like [Sinocyclocheilus grahami]	K06576	_
	CI01000027_04750483_04762663	4.75116	1.23571	1.29e-05	0.000287927		gi|1025324262|ref|XP_016387600.1| PREDICTED: tripartite motif-containing protein 46-like [Sinocyclocheilus rhinocerous]<>gi|1025324265|ref|XP_016387601.1| PREDICTED: tripartite motif-containing protein 46-like [Sinocyclocheilus rhinocerous]	K12022	_
	CI01000029_05433797_05436469	-4.55742	1.30377	1.29e-05	0.000287927		gi|1025304598|ref|XP_016382249.1| PREDICTED: proto-oncogene c-Fos-like isoform X1 [Sinocyclocheilus rhinocerous]	K04379	_
	CI01000115_01163758_01228741	-4.53195	1.28112	1.29e-05	0.000287927		gi|929126599|ref|XP_013981004.1| PREDICTED: neuron navigator 2-like isoform X5 [Salmo salar]	_	_
	CI01000304_00772995_00827316	-3.26915	4.04362	1.29e-05	0.000287927		gi|148675278|gb|EDL07225.1| mCG19971 [Mus musculus]	K13499	_
	CI01000327_03662022_03727071	-3.118	6.18473	1.29e-05	0.000288152		gi|1025061684|ref|XP_016333249.1| PREDICTED: arf-GAP with SH3 domain, ANK repeat and PH domain-containing protein 1-like isoform X2 [Sinocyclocheilus anshuiensis]	K12488	_
	CI01000051_01669393_01716229	3.15948	4.95588	1.29e-05	0.00028849		gi|1025267952|ref|XP_016373765.1| PREDICTED: tensin-3-like isoform X3 [Sinocyclocheilus rhinocerous]	K18080	_
	CI01000026_11497016_11677778	-3.67107	2.5039	1.3e-05	0.000289423		gi|1020510890|ref|XP_016094555.1| PREDICTED: VPS10 domain-containing receptor SorCS2-like isoform X4 [Sinocyclocheilus grahami]	_	_
	CI01000072_03210624_03244667	-3.09388	7.64612	1.3e-05	0.000289448		gi|1020418285|ref|XP_016128093.1| PREDICTED: MAP/microtubule affinity-regulating kinase 4-like isoform X2 [Sinocyclocheilus grahami]	K08798	_
	CI01000027_01466387_01475758	3.12186	5.85654	1.3e-05	0.000289477		gi|1025085841|ref|XP_016341348.1| PREDICTED: OTU domain-containing protein 7B isoform X1 [Sinocyclocheilus anshuiensis]	K11860	_
	CI01000304_05295266_05357773	-4.01955	2.01842	1.32e-05	0.000292653		gi|1025269637|ref|XP_016374211.1| PREDICTED: sarcosine dehydrogenase, mitochondrial-like [Sinocyclocheilus rhinocerous]	K00314	_
	CI01000024_04775678_04783105	-3.38592	3.13047	1.33e-05	0.000296164		gi|565323579|gb|ETE74142.1| Myosin-10, partial [Ophiophagus hannah]	K10352	_
	CI01000013_01115756_01164524	3.22765	4.21839	1.34e-05	0.000297262		gi|1025277085|ref|XP_016376242.1| PREDICTED: RNA polymerase II elongation factor ELL2-like [Sinocyclocheilus rhinocerous]	K15183	_
	CI01000199_00109267_00181493	4.41027	1.45325	1.34e-05	0.000297262		gi|1020416388|ref|XP_016127070.1| PREDICTED: protein TANC1-like [Sinocyclocheilus grahami]	_	_
	CI01000016_05508930_05523828	-4.21021	1.51416	1.34e-05	0.000297262		gi|1025005699|ref|XP_016321874.1| PREDICTED: voltage-dependent calcium channel gamma-4 subunit-like [Sinocyclocheilus anshuiensis]	K04873	_
	CI01000288_00073310_00085164	-4.21021	1.51416	1.34e-05	0.000297262		gi|966646329|gb|KTF81241.1| hypothetical protein cypCar_00041517, partial [Cyprinus carpio]	_	_
	CI01000000_17672091_17673742	5.34249	0.915847	1.34e-05	0.000297709		gi|1024978617|ref|XP_016310874.1| PREDICTED: homeobox protein MSH-A-like [Sinocyclocheilus anshuiensis]	K09341	_
	CI01000030_02466855_02469633	-5.17161	1.00254	1.34e-05	0.000297709			_	_
	CI01000080_01423592_01425914	-3.31783	3.61125	1.35e-05	0.000298198		gi|966668894|gb|KTG02275.1| hypothetical protein cypCar_00016321 [Cyprinus carpio]	_	_
	CI01000169_00769848_00794717	3.07554	10.2945	1.35e-05	0.000298198		gi|1020474599|ref|XP_016142535.1| PREDICTED: coagulation factor VIII-like isoform X1 [Sinocyclocheilus grahami]	K03899	_
	CI01000168_01219310_01220521	-3.20246	4.34104	1.36e-05	0.000299881		gi|1025239531|ref|XP_016366057.1| PREDICTED: torsin-4A-like [Sinocyclocheilus rhinocerous]	_	_
	CI01000000_15120586_15123050	-3.07584	9.15557	1.36e-05	0.000300482		gi|966707859|gb|KTG40099.1| hypothetical protein cypCar_00017640 [Cyprinus carpio]	_	molecular_function:sequence-specific DNA binding transcription factor activity(GO:0003700);biological_process:regulation of transcription, DNA-templated(GO:0006355)
	CI01000339_05932828_05933256	-3.26935	4.0027	1.36e-05	0.000300875		gi|1025041565|ref|XP_016327791.1| PREDICTED: histone H2AX [Sinocyclocheilus anshuiensis]<>gi|1025321108|ref|XP_016386752.1| PREDICTED: histone H2AX [Sinocyclocheilus rhinocerous]<>gi|966640762|gb|KTF75676.1| hypothetical protein cypCar_00032986 [Cyprinus carpio]	K11251	cellular_component:nucleosome(GO:0000786);biological_process:DNA recombination(GO:0006310);biological_process:meiotic nuclear division(GO:0007126);biological_process:DNA repair(GO:0006281);molecular_function:DNA binding(GO:0003677);biological_process:nucleosome assembly(GO:0006334);molecular_function:protein heterodimerization activity(GO:0046982);cellular_component:nucleus(GO:0005634)
	CI01000009_14476688_14573629	-3.148	5.31369	1.36e-05	0.000300875		gi|1020521772|ref|XP_016100329.1| PREDICTED: histone deacetylase 4-like [Sinocyclocheilus grahami]	K11406	_
	CI01000398_00055974_00066044	-3.1598	5.06945	1.38e-05	0.000305168		gi|966648589|gb|KTF83499.1| hypothetical protein cypCar_00048456 [Cyprinus carpio]	_	_
	CI01180000_07958912_07969452	-3.07837	8.10033	1.39e-05	0.000305621		gi|1025050076|ref|XP_016330141.1| PREDICTED: V-type immunoglobulin domain-containing suppressor of T-cell activation-like [Sinocyclocheilus anshuiensis]	_	_
	CI01000030_05791222_05793350	-3.07016	9.96951	1.39e-05	0.000306766		gi|1024954909|ref|XP_016298307.1| PREDICTED: regulator of G-protein signaling 13-like isoform X2 [Sinocyclocheilus anshuiensis]	K16449	_
	CI01000072_02452424_02456657	3.22225	4.08615	1.4e-05	0.000308376		gi|597764125|ref|XP_007245990.1| PREDICTED: aryl-hydrocarbon-interacting protein-like 1 [Astyanax mexicanus]	K17767	_
	CI01000046_01098117_01099160	-3.08866	7.10453	1.4e-05	0.000308566		gi|1020535697|ref|XP_016106524.1| PREDICTED: probable G-protein coupled receptor 146 isoform X1 [Sinocyclocheilus grahami]	K08431	_
	CI01000018_05888431_05897614	-3.25286	3.81073	1.43e-05	0.00031402		gi|1024983626|ref|XP_016313554.1| PREDICTED: myb-related protein A [Sinocyclocheilus anshuiensis]	K09421	_
	CI01000000_17696710_17697801	8.01444	0.505755	1.45e-05	0.000316071		gi|148508789|gb|ABQ81650.1| dopamine D1A receptor [Ctenopharyngodon idella]<>gi|163658555|gb|ABY28385.1| dopamine receptor D1A subtype [Ctenopharyngodon idella]	K04144	_
	CI01000004_11407198_11412220	8.01444	0.505755	1.45e-05	0.000316071		gi|148508787|gb|ABQ81649.1| pitutary adenylate cyclase-activating polypeptide [Ctenopharyngodon idella]	K05262	biological_process:brain development(GO:0007420);cellular_component:extracellular region(GO:0005576);molecular_function:hormone activity(GO:0005179);biological_process:camera-type eye development(GO:0043010)
	CI01000026_02795613_02801257	8.01444	0.505755	1.45e-05	0.000316071		gi|1020419248|ref|XP_016128601.1| PREDICTED: tetraspanin-18-like isoform X1 [Sinocyclocheilus grahami]<>gi|1025085376|ref|XP_016341223.1| PREDICTED: tetraspanin-18-like isoform X1 [Sinocyclocheilus anshuiensis]	K17353	_
	CI01000034_02563086_02564052	8.01444	0.505755	1.45e-05	0.000316071		gi|1013855068|gb|AMT92190.1| interferon 2 [Ctenopharyngodon idella]	_	_
	CI01000070_00272836_00275886	8.01444	0.505755	1.45e-05	0.000316071		gi|1020538197|ref|XP_016107030.1| PREDICTED: uncharacterized protein LOC107566166 [Sinocyclocheilus grahami]	_	_
	CI01000306_09296908_09305617	-7.99789	0.5834	1.45e-05	0.000316071		gi|1024965655|ref|XP_016304029.1| PREDICTED: uncharacterized protein LOC107659555 [Sinocyclocheilus anshuiensis]	_	_
	CI01000306_11125557_11128262	-7.99789	0.5834	1.45e-05	0.000316071		gi|1020410323|ref|XP_016123796.1| PREDICTED: prepro-urotensin II-beta-like [Sinocyclocheilus grahami]	_	_
	CI01000000_18003913_18078426	-3.35749	3.40126	1.45e-05	0.000316662		gi|528499821|ref|XP_005173205.1| PREDICTED: ecto-NOX disulfide-thiol exchanger 2 isoform X1 [Danio rerio]<>gi|1040662981|ref|XP_017214607.1| PREDICTED: ecto-NOX disulfide-thiol exchanger 2 isoform X1 [Danio rerio]	_	_
	CI01000068_00663458_00672380	-3.47437	2.83569	1.46e-05	0.000319742		gi|667304129|ref|XP_008582227.1| PREDICTED: dihydropyrimidinase-related protein 5 [Galeopterus variegatus]	K07529	cellular_component:cytoplasm(GO:0005737);biological_process:pyrimidine nucleobase catabolic process(GO:0006208);molecular_function:hydrolase activity, acting on carbon-nitrogen (but not peptide) bonds, in cyclic amides(GO:0016812)
	CI01000018_05217404_05218896	3.50566	2.64128	1.47e-05	0.000320992		gi|966653118|gb|KTF88020.1| hypothetical protein cypCar_00042602 [Cyprinus carpio]	_	_
	CI01119064_00000599_00000907	-3.07665	7.23419	1.47e-05	0.000321132		gi|335987407|gb|AEH76771.1| immunoglobulin mu heavy chain, partial [Ctenopharyngodon idella]	_	_
	CI01000300_08558046_08560329	4.72208	1.20917	1.48e-05	0.000323089		gi|1025180126|ref|XP_016421293.1| PREDICTED: ubiquitin carboxyl-terminal hydrolase isozyme L1-like [Sinocyclocheilus rhinocerous]	K05611	_
	CI01000020_06944393_06947480	3.09889	5.88999	1.49e-05	0.000325459		gi|50540014|ref|NP_001002473.1| ADP-ribosylation factor-like protein 1 [Danio rerio]<>gi|49903929|gb|AAH76341.1| Zgc:92883 [Danio rerio]<>gi|182889338|gb|AAI64960.1| Zgc:92883 protein [Danio rerio]	K07942	cellular_component:trans-Golgi network(GO:0005802);biological_process:protein localization to Golgi apparatus(GO:0034067);biological_process:retrograde transport, endosome to Golgi(GO:0042147);biological_process:activation of phospholipase D activity(GO:0031584);molecular_function:GTP binding(GO:0005525);molecular_function:enzyme activator activity(GO:0008047);;cellular_component:Golgi apparatus(…
	CI01000339_07584801_07611636	-3.43582	2.90427	1.5e-05	0.00032546		gi|1025173567|ref|XP_016358305.1| PREDICTED: GTPase-activating Rap/Ran-GAP domain-like protein 3 isoform X2 [Sinocyclocheilus anshuiensis]	_	_
	CI01000028_05890154_05898140	-3.49977	2.7474	1.51e-05	0.000327864		gi|1025275431|ref|XP_016375784.1| PREDICTED: CLOCK-interacting pacemaker-like [Sinocyclocheilus rhinocerous]<>gi|1025275433|ref|XP_016375785.1| PREDICTED: CLOCK-interacting pacemaker-like [Sinocyclocheilus rhinocerous]	_	_
	CI01000310_02639022_02649415	-3.87849	2.13733	1.51e-05	0.000328566		gi|1025413400|ref|XP_016411277.1| PREDICTED: LOW QUALITY PROTEIN: A-kinase anchor protein 12-like [Sinocyclocheilus rhinocerous]	_	_
	CI01000009_03568782_03574843	4.38523	1.43042	1.51e-05	0.000328566		gi|1025213600|ref|XP_016429421.1| PREDICTED: uncharacterized protein LOC107756723 [Sinocyclocheilus rhinocerous]	_	_
	CI01000325_05963237_05964658	-4.18823	1.49464	1.51e-05	0.000328566		gi|1024964642|ref|XP_016303481.1| PREDICTED: uncharacterized protein LOC107659159 [Sinocyclocheilus anshuiensis]	_	_
	CI01000010_04445984_04469908	-3.33652	3.44792	1.52e-05	0.000329188		gi|594655501|ref|XP_007176139.1| PREDICTED: cAMP-specific 3',5'-cyclic phosphodiesterase 4D isoform X5 [Balaenoptera acutorostrata scammoni]	K13293	_
	CI01000335_00149953_00163006	3.12787	5.1085	1.56e-05	0.0003389		gi|1020414206|ref|XP_016125891.1| PREDICTED: transcription factor EC-like isoform X2 [Sinocyclocheilus grahami]	K15591	_
	CI01000205_00895100_00897810	3.09925	5.61899	1.58e-05	0.000342811		gi|1025080939|ref|XP_016340005.1| PREDICTED: guanine nucleotide-binding protein G(I)/G(S)/G(O) subunit gamma-10 [Sinocyclocheilus anshuiensis]	K04545	_
	CI01096261_00000800_00001464	-5.14	0.974503	1.59e-05	0.000344729			_	_
	CI01000304_18541563_18569559	-3.33875	3.16838	1.59e-05	0.000344742		gi|966706005|gb|KTG38246.1| hypothetical protein cypCar_00015988 [Cyprinus carpio]	_	_
	CI01000325_00719124_00749486	-3.40152	2.96972	1.6e-05	0.00034481		gi|1020525791|ref|XP_016102465.1| PREDICTED: ankyrin repeat domain-containing protein 6-like isoform X2 [Sinocyclocheilus grahami]	_	_
	CI01000072_02290646_02296564	-3.16779	4.34141	1.61e-05	0.000346746		gi|688588288|ref|XP_009290027.1| PREDICTED: max-binding protein MNT [Danio rerio]	K09115	_
	CI01000158_01669583_01670236	-3.33994	3.38559	1.61e-05	0.000346808		gi|1020547651|ref|XP_016108973.1| PREDICTED: claudin-5-like [Sinocyclocheilus grahami]<>gi|1024923724|ref|XP_016343668.1| PREDICTED: claudin-5-like [Sinocyclocheilus anshuiensis]	K06087	_
	CI01000055_02735304_02738366	3.09841	5.38752	1.63e-05	0.000350671		gi|1025207550|ref|XP_016427810.1| PREDICTED: leucine-rich repeat-containing protein 59 [Sinocyclocheilus rhinocerous]<>gi|1025207553|ref|XP_016427811.1| PREDICTED: leucine-rich repeat-containing protein 59 [Sinocyclocheilus rhinocerous]	_	cellular_component:nuclear envelope(GO:0005635);cellular_component:integral component of membrane(GO:0016021);cellular_component:endoplasmic reticulum membrane(GO:0005789)
	CI01000325_07911751_07918447	3.04813	8.20616	1.63e-05	0.000351584		gi|1025377362|ref|XP_016399525.1| PREDICTED: protein disulfide-isomerase A6-like [Sinocyclocheilus rhinocerous]	K09584	_
	CI01000069_00403871_00404476	3.04415	8.42811	1.64e-05	0.000352899		gi|281324604|gb|ADA60714.1| suppressor of cytokine signaling 1 [Ctenopharyngodon idella]	K04694	_
	CI01000147_00686667_00693767	-3.41925	2.8895	1.65e-05	0.0003543		gi|454296301|dbj|BAM85924.1| arrestin 1 [Cyprinus carpio]	_	_
	CI01000059_07439674_07465822	-3.13313	4.86793	1.65e-05	0.0003543		gi|1025400335|ref|XP_016407753.1| PREDICTED: inositol polyphosphate 5-phosphatase K-like [Sinocyclocheilus rhinocerous]	_	_
	CI01000051_07345863_07353841	-3.05795	7.18568	1.66e-05	0.000356527		gi|253970472|ref|NP_001108211.2| MAP kinase-interacting serine/threonine-protein kinase 1 [Danio rerio]	K04372	biological_process:protein phosphorylation(GO:0006468);molecular_function:ATP binding(GO:0005524);molecular_function:protein serine/threonine kinase activity(GO:0004674)
	CI01000000_00753279_00782484	-3.97346	1.68041	1.67e-05	0.000359445		gi|658884877|ref|XP_008425276.1| PREDICTED: serine/threonine-protein phosphatase 2B catalytic subunit alpha isoform-like isoform X1 [Poecilia reticulata]	K04348	molecular_function:phosphoprotein phosphatase activity(GO:0004721)
	CI01000026_04510794_04529529	-4.16591	1.47484	1.71e-05	0.000367434		gi|1020397197|ref|XP_016138202.1| PREDICTED: transient receptor potential cation channel subfamily M member 1-like isoform X1 [Sinocyclocheilus grahami]	K04976	_
	CI01020803_00001551_00001916	-4.16591	1.47484	1.71e-05	0.000367434		gi|1040683040|ref|XP_017208495.1| PREDICTED: uncharacterized protein LOC100124609 isoform X1 [Danio rerio]	_	cellular_component:Golgi cisterna membrane(GO:0032580);molecular_function:fucosyltransferase activity(GO:0008417);biological_process:protein glycosylation(GO:0006486);cellular_component:integral component of membrane(GO:0016021)
	CI01000043_05088157_05094871	-3.19306	4.12926	1.71e-05	0.000367747		gi|1025341765|ref|XP_016392341.1| PREDICTED: beta,beta-carotene 15,15'-dioxygenase-like [Sinocyclocheilus rhinocerous]	K00515	_
	CI01000129_00643113_00645048	-3.6784	2.34919	1.75e-05	0.000374541		gi|966652138|gb|KTF87040.1| hypothetical protein cypCar_00014874 [Cyprinus carpio]	_	_
	CI01000072_02058184_02067046	-3.03245	8.52759	1.75e-05	0.000374724		gi|1025128401|ref|XP_016414100.1| PREDICTED: hypoxia-inducible factor 1-alpha-like isoform X1 [Sinocyclocheilus rhinocerous]	_	_
	CI01000055_05850191_05851967	3.18131	4.11452	1.75e-05	0.000374724		gi|1025052212|ref|XP_016330645.1| PREDICTED: apoptosis-enhancing nuclease-like [Sinocyclocheilus anshuiensis]	K18340	_
	CI01000000_01405606_01410241	-3.36071	3.26367	1.76e-05	0.00037592		gi|1024967303|ref|XP_016304923.1| PREDICTED: protein NipSnap homolog 3A-like isoform X1 [Sinocyclocheilus anshuiensis]	_	_
	CI01000113_00003487_00012253	-3.03307	8.2328	1.78e-05	0.000379694		gi|998453987|gb|AMK47892.1| tyrosine kinase 2 [Ctenopharyngodon idella]	K11219	_
	CI01087152_00000779_00001379	3.63464	2.07988	1.78e-05	0.000379694		gi|1025362817|ref|XP_016404068.1| PREDICTED: lymphocyte antigen 6B-like [Sinocyclocheilus rhinocerous]	_	_
	CI01000288_00069736_00071155	-3.11891	4.99532	1.78e-05	0.000379694		gi|291170988|gb|ADD82671.1| immunoglobulin mu heavy chain [Ctenopharyngodon idella]	_	_
	CI01000098_02832999_02842305	3.18095	4.08202	1.78e-05	0.000380134		gi|1025316016|ref|XP_016385380.1| PREDICTED: guanylate-binding protein 1-like [Sinocyclocheilus rhinocerous]	_	molecular_function:GTPase activity(GO:0003924);molecular_function:GTP binding(GO:0005525)
	CI01000027_08033124_08037571	-3.02655	9.46033	1.79e-05	0.000380638		gi|1025408722|ref|XP_016410008.1| PREDICTED: induced myeloid leukemia cell differentiation protein Mcl-1 homolog [Sinocyclocheilus rhinocerous]	_	_
	CI01000010_04614357_04631136	-3.60454	2.44445	1.79e-05	0.000380722		gi|1020399746|ref|XP_016084399.1| PREDICTED: DEP domain-containing protein 1A [Sinocyclocheilus grahami]	K11158	_
	CI01000026_08501499_08526463	7.96572	0.461834	1.8e-05	0.000380978		gi|1020528383|ref|XP_016103844.1| PREDICTED: solute carrier family 12 member 4-like isoform X1 [Sinocyclocheilus grahami]<>gi|1020528385|ref|XP_016103845.1| PREDICTED: solute carrier family 12 member 4-like isoform X2 [Sinocyclocheilus grahami]	K14427	_
	CI01000095_01922388_01929182	7.96572	0.461834	1.8e-05	0.000380978		gi|1025220818|ref|XP_016423738.1| PREDICTED: myelin-associated glycoprotein-like isoform X1 [Sinocyclocheilus rhinocerous]<>gi|1025220822|ref|XP_016423746.1| PREDICTED: myelin-associated glycoprotein-like isoform X1 [Sinocyclocheilus rhinocerous]<>gi|1025220826|ref|XP_016423754.1| PREDICTED: myelin-associated glycoprotein-like isoform X1 [Sinocyclocheilus rhinocerous]<>gi|1025220830|ref|XP_016423…	K06771	_
	CI01000160_00182173_00184259	7.96572	0.461834	1.8e-05	0.000380978		gi|1025115531|ref|XP_016404327.1| PREDICTED: polymeric immunoglobulin receptor-like [Sinocyclocheilus rhinocerous]	_	_
	CI01082097_00001296_00002105	7.96572	0.461834	1.8e-05	0.000380978		gi|1025030853|ref|XP_016324871.1| PREDICTED: probable tRNA (uracil-O(2)-)-methyltransferase [Sinocyclocheilus anshuiensis]	_	_
	CI01000000_05715062_05715540	-7.95499	0.545607	1.8e-05	0.000380978		gi|1020487028|ref|XP_016149150.1| PREDICTED: HRAS-like suppressor 3 [Sinocyclocheilus grahami]<>gi|1020487030|ref|XP_016149151.1| PREDICTED: HRAS-like suppressor 3 [Sinocyclocheilus grahami]	_	_
	CI01000028_00704858_00705817	-7.95499	0.545607	1.8e-05	0.000380978			_	_
	CI01000339_00188554_00189543	-7.95499	0.545607	1.8e-05	0.000380978		gi|1025406350|ref|XP_016409372.1| PREDICTED: chemokine-like receptor 1 [Sinocyclocheilus rhinocerous]	_	_
	CI01000344_02678134_02678767	-7.95499	0.545607	1.8e-05	0.000380978		gi|966654561|gb|KTF89415.1| hypothetical protein cypCar_00022990 [Cyprinus carpio]	_	_
	CI01103040_00002665_00004428	-7.95499	0.545607	1.8e-05	0.000380978		gi|1024985783|ref|XP_016314664.1| PREDICTED: uncharacterized protein LOC107667502 isoform X1 [Sinocyclocheilus anshuiensis]	_	_
	CI01000046_03544999_03551574	3.17886	3.90755	1.83e-05	0.000388306		gi|966670802|gb|KTG04183.1| hypothetical protein cypCar_00006328 [Cyprinus carpio]	K17860	_
	CI01000201_00616218_00623616	3.04134	6.79228	1.84e-05	0.000389981		gi|966644692|gb|KTF79604.1| hypothetical protein cypCar_00032043 [Cyprinus carpio]	K10170	_
	CI01000092_02602158_02608405	3.11213	4.76604	1.86e-05	0.00039271		gi|688587022|ref|XP_009289743.1| PREDICTED: autophagy-related protein 16-2 isoform X1 [Danio rerio]	K17890	_
	CI01000039_04852902_04868261	-3.05201	6.21496	1.86e-05	0.000393028		gi|1025248089|ref|XP_016368399.1| PREDICTED: myotubularin-related protein 12 [Sinocyclocheilus rhinocerous]	K18085	_
	CI01000012_13471010_13484053	4.15243	1.6021	1.87e-05	0.000393783		gi|1020527368|ref|XP_016103303.1| PREDICTED: tetraspanin-15-like [Sinocyclocheilus grahami]	K17297	cellular_component:integral component of membrane(GO:0016021)
	CI01000117_00433284_00440866	-3.95387	1.66304	1.87e-05	0.000393783		gi|1025158598|ref|XP_016417820.1| PREDICTED: venom phosphodiesterase 1-like [Sinocyclocheilus rhinocerous]	_	_
	CI01000069_03845642_03851052	-3.95758	1.96287	1.87e-05	0.000394055		gi|1025368472|ref|XP_016397121.1| PREDICTED: transmembrane gamma-carboxyglutamic acid protein 2-like isoform X1 [Sinocyclocheilus rhinocerous]	_	_
	CI01000001_04779079_04792659	3.10832	4.74309	1.88e-05	0.000396226		gi|1020528826|ref|XP_016104081.1| PREDICTED: solute carrier family 17 member 9-like [Sinocyclocheilus grahami]	K12303	biological_process:transmembrane transport(GO:0055085);cellular_component:integral component of membrane(GO:0016021);molecular_function:transporter activity(GO:0005215)
	CI01180000_06828109_06832096	-5.10767	0.945895	1.89e-05	0.000398478		gi|1025160978|ref|XP_016355979.1| PREDICTED: uncharacterized protein LOC107699281 [Sinocyclocheilus anshuiensis]	_	_
	CI01000071_02107452_02124157	-3.05793	5.91527	1.92e-05	0.000404526		gi|1040690714|ref|XP_009299539.2| PREDICTED: autism susceptibility gene 2 protein [Danio rerio]	_	_
	CI01000052_02366450_02367471	3.61818	2.06507	1.93e-05	0.000405589		gi|1024985837|ref|XP_016314691.1| PREDICTED: Rieske domain-containing protein [Sinocyclocheilus anshuiensis]	_	_
	CI01000028_00444425_00447507	4.33381	1.38365	1.94e-05	0.000406834		gi|966640039|gb|KTF74953.1| hypothetical protein cypCar_00035071 [Cyprinus carpio]	_	cellular_component:extracellular region(GO:0005576);molecular_function:growth factor activity(GO:0008083);biological_process:growth(GO:0040007)
	CI01000143_00083317_00092920	4.33381	1.38365	1.94e-05	0.000406834		gi|966640725|gb|KTF75639.1| hypothetical protein cypCar_00038485 [Cyprinus carpio]	_	_
	CI01000168_00464899_00511499	-4.14324	1.45477	1.94e-05	0.000406834			_	_
	CI01000062_01401358_01417189	3.04716	5.96247	1.95e-05	0.000408833		gi|1024982547|ref|XP_016312975.1| PREDICTED: transmembrane protein 62-like [Sinocyclocheilus anshuiensis]	_	_
	CI01093888_00003254_00003940	-3.12737	4.50716	1.97e-05	0.000413259		gi|1024991915|ref|XP_016316114.1| PREDICTED: NACHT, LRR and PYD domains-containing protein 1-like [Sinocyclocheilus anshuiensis]	_	_
	CI01000000_17729584_17730495	3.57763	2.19192	1.98e-05	0.000413429		gi|923058469|gb|ALB06090.1| interleukin-4 [Ctenopharyngodon idella]	_	_
	CI01000348_00871308_00907195	-4.45271	1.21092	1.98e-05	0.000413429		gi|688570028|ref|XP_009302721.1| PREDICTED: myosin light chain kinase, smooth muscle isoform X2 [Danio rerio]	K00907	biological_process:blood coagulation(GO:0007596);biological_process:protein phosphorylation(GO:0006468);molecular_function:ATP binding(GO:0005524);molecular_function:protein serine/threonine kinase activity(GO:0004674)
	CI01000003_00418856_00424844	-3.33255	2.99834	2.02e-05	0.000422435		gi|966712617|gb|KTG44855.1| hypothetical protein cypCar_00029333 [Cyprinus carpio]	_	_
	CI01000026_11280159_11287703	-3.02704	6.51515	2.03e-05	0.000425265		gi|1025412719|ref|XP_016411088.1| PREDICTED: uncharacterized protein LOC107742573 [Sinocyclocheilus rhinocerous]	_	_
	CI01000119_01640048_01644501	-3.11664	4.52426	2.04e-05	0.000425404		gi|1020522611|ref|XP_016100784.1| PREDICTED: 1-acyl-sn-glycerol-3-phosphate acyltransferase gamma [Sinocyclocheilus grahami]<>gi|1020522613|ref|XP_016100785.1| PREDICTED: 1-acyl-sn-glycerol-3-phosphate acyltransferase gamma [Sinocyclocheilus grahami]<>gi|1020522615|ref|XP_016100787.1| PREDICTED: 1-acyl-sn-glycerol-3-phosphate acyltransferase gamma [Sinocyclocheilus grahami]<>gi|1020522617|ref|XP_…	K13523	_
	CI01000054_08362528_08374374	3.01136	7.77848	2.05e-05	0.00042756		gi|938073113|gb|KPP70906.1| hypothetical protein Z043_110228, partial [Scleropages formosus]	K06184	_
	CI01000054_07675827_07711906	-3.03251	6.36081	2.06e-05	0.000429983		gi|1025132802|ref|XP_016351939.1| PREDICTED: protein FAM65B isoform X5 [Sinocyclocheilus anshuiensis]	_	_
	CI01000103_00161419_00162507	-3.07864	5.20438	2.06e-05	0.000430023		gi|1025208936|ref|XP_016428203.1| PREDICTED: probable serine/threonine-protein kinase DDB_G0280717 [Sinocyclocheilus rhinocerous]	_	_
	CI01000092_02750776_02767145	-3.93401	1.64546	2.08e-05	0.00043425		gi|1025410808|ref|XP_016410565.1| PREDICTED: nuclear GTPase SLIP-GC-like [Sinocyclocheilus rhinocerous]	_	_
	CI01000340_02431091_02437843	3.38601	2.8261	2.1e-05	0.000437657		gi|1025137175|ref|XP_016352740.1| PREDICTED: selenocysteine lyase isoform X1 [Sinocyclocheilus anshuiensis]<>gi|1025137181|ref|XP_016352741.1| PREDICTED: selenocysteine lyase isoform X1 [Sinocyclocheilus anshuiensis]	K01763	biological_process:metabolic process(GO:0008152);molecular_function:pyridoxal phosphate binding(GO:0030170);molecular_function:catalytic activity(GO:0003824)
	CI01000319_02863544_02879823	3.02147	6.32934	2.11e-05	0.000438779		gi|808883618|gb|KKF30730.1| Endonuclease domain-containing 1 protein [Larimichthys crocea]	_	_
	CI01000012_11068977_11070913	4.30739	1.35969	2.2e-05	0.000457388		gi|528498257|ref|XP_685302.4| PREDICTED: sodium/potassium/calcium exchanger 3 [Danio rerio]	K13751	_
	CI01000001_04976994_04988795	-3.31696	2.98452	2.21e-05	0.00045927		gi|1025003250|ref|XP_016320634.1| PREDICTED: neurofascin-like [Sinocyclocheilus anshuiensis]	K06757	_
	CI01000113_02321704_02328603	3.0104	6.43863	2.24e-05	0.000465107		gi|1020527820|ref|XP_016103546.1| PREDICTED: phenylalanine--tRNA ligase alpha subunit [Sinocyclocheilus grahami]	K01889	_
	CI01000004_06156517_06161977	7.9153	0.416563	2.25e-05	0.000465113		gi|1025320514|ref|XP_016386593.1| PREDICTED: paired mesoderm homeobox protein 1-like [Sinocyclocheilus rhinocerous]	K09329	molecular_function:sequence-specific DNA binding transcription factor activity(GO:0003700);molecular_function:sequence-specific DNA binding(GO:0043565);biological_process:multicellular organismal development(GO:0007275);cellular_component:nucleus(GO:0005634);biological_process:regulation of transcription, DNA-templated(GO:0006355)
	CI01000054_11154206_11157480	7.9153	0.416563	2.25e-05	0.000465113		gi|1025393267|ref|XP_016405840.1| PREDICTED: XK-related protein 8-like isoform X1 [Sinocyclocheilus rhinocerous]	_	_
	CI01000306_09216004_09219290	7.9153	0.416563	2.25e-05	0.000465113		gi|1025186259|ref|XP_016422381.1| PREDICTED: uncharacterized protein LOC107751229 [Sinocyclocheilus rhinocerous]	_	_
	CI01000020_07116109_07120411	-7.91078	0.506777	2.25e-05	0.000465113		gi|966704381|gb|KTG36622.1| hypothetical protein cypCar_00009796 [Cyprinus carpio]	_	cellular_component:cytoskeleton(GO:0005856);;biological_process:cilium movement(GO:0003341)
	CI01000191_00244249_00248883	-7.91078	0.506777	2.25e-05	0.000465113		gi|1025335954|ref|XP_016390807.1| PREDICTED: deleted in malignant brain tumors 1 protein-like [Sinocyclocheilus rhinocerous]	_	_
	CI01000365_00265835_00270250	-7.91078	0.506777	2.25e-05	0.000465113		gi|1025228380|ref|XP_016431578.1| PREDICTED: WAP, Kazal, immunoglobulin, Kunitz and NTR domain-containing protein-like [Sinocyclocheilus rhinocerous]	_	biological_process:negative regulation of peptidase activity(GO:0010466);cellular_component:extracellular region(GO:0005576);molecular_function:metalloendopeptidase inhibitor activity(GO:0008191);molecular_function:serine-type endopeptidase inhibitor activity(GO:0004867)
	CI01180000_03156666_03178903	5.26871	0.848906	2.25e-05	0.000465527		gi|1025003899|ref|XP_016320979.1| PREDICTED: phosphofurin acidic cluster sorting protein 2-like isoform X2 [Sinocyclocheilus anshuiensis]	_	_
	CI01000000_12593396_12609807	-5.07461	0.916699	2.25e-05	0.000465527		gi|1025400719|ref|XP_016407858.1| PREDICTED: actin filament-associated protein 1-like 1 isoform X1 [Sinocyclocheilus rhinocerous]	_	_
	CI01000081_00852724_00870020	-5.07461	0.916699	2.25e-05	0.000465527			_	_
	CI01000027_03142352_03156415	-2.98527	8.55576	2.27e-05	0.000468682		gi|1024984239|ref|XP_016313874.1| PREDICTED: semaphorin-4A-like isoform X1 [Sinocyclocheilus anshuiensis]	_	_
	CI01139405_00002173_00002562	-3.79201	2.06007	2.28e-05	0.000469208		gi|966651112|gb|KTF86014.1| hypothetical protein cypCar_00045458, partial [Cyprinus carpio]	_	_
	CI01000338_00384480_00389400	-3.06105	5.05396	2.28e-05	0.000469208		gi|1020470096|ref|XP_016140131.1| PREDICTED: sushi domain-containing protein 1-like, partial [Sinocyclocheilus grahami]	_	_
	CI01000040_04260668_04304388	-3.10762	4.4348	2.29e-05	0.000470887		gi|1020408990|ref|XP_016123092.1| PREDICTED: transcription factor COE1-like isoform X2 [Sinocyclocheilus grahami]	K09103	_
	CI01000130_00742577_00751655	2.99194	7.60376	2.29e-05	0.000470887		gi|1025119960|ref|XP_016349758.1| PREDICTED: low-density lipoprotein receptor-like [Sinocyclocheilus anshuiensis]	K06233	_
	CI01000027_02083444_02085743	-2.98397	8.42063	2.29e-05	0.000471774		gi|1020465252|ref|XP_016137551.1| PREDICTED: sulfotransferase family cytosolic 2B member 1-like [Sinocyclocheilus grahami]	K01015	_
	CI01000030_07554965_07558766	3.12935	4.09955	2.3e-05	0.000472227		gi|1025210028|ref|XP_016428481.1| PREDICTED: vesicle transport protein USE1 isoform X5 [Sinocyclocheilus rhinocerous]<>gi|1025210032|ref|XP_016428482.1| PREDICTED: vesicle transport protein USE1 isoform X6 [Sinocyclocheilus rhinocerous]	K08507	_
	CI01000300_05227185_05241315	-3.70139	2.1879	2.3e-05	0.000472379		gi|1025314351|ref|XP_016384917.1| PREDICTED: myotubularin-related protein 7-like isoform X1 [Sinocyclocheilus rhinocerous]	K18083	_
	CI01000187_00544719_00546293	3.54698	2.16438	2.3e-05	0.000472379		gi|160333107|ref|NP_001103954.1| dolichol kinase [Danio rerio]<>gi|134024872|gb|AAI34947.1| Zgc:162284 protein [Danio rerio]	K00902	cellular_component:integral component of endoplasmic reticulum membrane(GO:0030176);biological_process:dolichyl monophosphate biosynthetic process(GO:0043048);molecular_function:dolichol kinase activity(GO:0004168)
	CI01000135_00433702_00445785	-3.17809	3.69633	2.31e-05	0.000473394		gi|1024936654|ref|XP_016324731.1| PREDICTED: mitotic checkpoint serine/threonine-protein kinase BUB1 [Sinocyclocheilus anshuiensis]	_	_
	CI01000016_09748780_09759954	3.01133	6.00974	2.31e-05	0.00047404		gi|1025079277|ref|XP_016339556.1| PREDICTED: magnesium transporter MRS2 homolog, mitochondrial-like [Sinocyclocheilus anshuiensis]<>gi|1025079281|ref|XP_016339558.1| PREDICTED: magnesium transporter MRS2 homolog, mitochondrial-like [Sinocyclocheilus anshuiensis]	K16075	_
	CI01158834_00000176_00000779	-3.89344	1.60964	2.33e-05	0.000477737		gi|966669201|gb|KTG02582.1| hypothetical protein cypCar_00024210 [Cyprinus carpio]	_	_
	CI01000029_07332828_07336542	2.98522	7.96717	2.34e-05	0.000478354		gi|269784631|ref|NP_001161426.1| V-type proton ATPase subunit D [Danio rerio]<>gi|28278870|gb|AAH45370.1| ATPase, H+ transporting, V1 subunit D [Danio rerio]	K02149	molecular_function:ATPase activity, coupled to transmembrane movement of substances(GO:0042626)
	CI01180000_00263000_00297934	3.21073	3.41121	2.35e-05	0.000480581		gi|1025050006|ref|XP_016330122.1| PREDICTED: tyrosine-protein kinase Mer isoform X1 [Sinocyclocheilus anshuiensis]	K05117	_
	CI01000037_03824405_03854894	-3.03041	5.58983	2.37e-05	0.000485559		gi|1025088023|ref|XP_016341931.1| PREDICTED: ankyrin repeat domain-containing protein 10-like isoform X1 [Sinocyclocheilus anshuiensis]	_	_
	CI01000321_02522945_02541898	3.2298	3.13706	2.39e-05	0.000488716		gi|1024958169|ref|XP_016300047.1| PREDICTED: epiplakin-like [Sinocyclocheilus anshuiensis]	K10388	_
	CI01000357_00167846_00168814	3.19148	3.54414	2.4e-05	0.00048991		gi|1025326603|ref|XP_016388230.1| PREDICTED: transcription factor Maf-like isoform X1 [Sinocyclocheilus rhinocerous]<>gi|1025326607|ref|XP_016388231.1| PREDICTED: transcription factor Maf-like isoform X2 [Sinocyclocheilus rhinocerous]<>gi|1025326611|ref|XP_016388232.1| PREDICTED: transcription factor Maf-like isoform X3 [Sinocyclocheilus rhinocerous]	K09035	_
	CI01000053_06148375_06153273	3.94819	1.71833	2.41e-05	0.000491296		gi|41053796|ref|NP_956872.1| actin related protein 2/3 complex, subunit 5-like, a [Danio rerio]<>gi|34784050|gb|AAH56697.1| Arpc5l protein [Danio rerio]<>gi|41351038|gb|AAH65664.1| Actin related protein 2/3 complex, subunit 5-like [Danio rerio]	K05754	cellular_component:cytoskeleton(GO:0005856);biological_process:regulation of actin filament polymerization(GO:0030833)
	CI01109301_00000723_00000937	3.69142	1.73546	2.41e-05	0.000491296			_	_
	CI01000340_13489016_13506783	3.1255	3.93143	2.44e-05	0.000496585		gi|1024955930|ref|XP_016298840.1| PREDICTED: protein-arginine deiminase type-2-like [Sinocyclocheilus anshuiensis]	K01481	_
	CI01000003_00731635_00742538	-3.08136	4.49295	2.47e-05	0.000502394		gi|1024950114|ref|XP_016295755.1| PREDICTED: transferrin receptor protein 1-like [Sinocyclocheilus anshuiensis]<>gi|1024950116|ref|XP_016295756.1| PREDICTED: transferrin receptor protein 1-like [Sinocyclocheilus anshuiensis]<>gi|1024950118|ref|XP_016295757.1| PREDICTED: transferrin receptor protein 1-like [Sinocyclocheilus anshuiensis]<>gi|1024950120|ref|XP_016295758.1| PREDICTED: transferrin rec…	K06503	_
	CI01000339_06753621_06757973	-3.77708	2.04678	2.47e-05	0.000503999		gi|1020423006|ref|XP_016130611.1| PREDICTED: uncharacterized protein LOC107587361 isoform X1 [Sinocyclocheilus grahami]	K13886	_
	CI01000030_07987094_07988489	-2.96963	8.47334	2.48e-05	0.000504644		gi|1020422021|ref|XP_016130075.1| PREDICTED: uncharacterized protein LOC107587000 [Sinocyclocheilus grahami]	_	_
	CI01000312_00562199_00564611	2.98532	6.95025	2.48e-05	0.000505024		gi|974096125|ref|XP_015246552.1| PREDICTED: V-type proton ATPase subunit B, brain isoform [Cyprinodon variegatus]	K02147	_
	CI01000023_00241262_00242209	3.48717	2.25732	2.49e-05	0.000505675		gi|1020574081|ref|XP_016114273.1| PREDICTED: uncharacterized protein LOC107572353 [Sinocyclocheilus grahami]	_	_
	CI01000063_02321620_02324262	3.117	4.08854	2.5e-05	0.000507116		gi|1027250549|ref|NP_001311456.1| monocarboxylate transporter 3 [Danio rerio]	K08185	_
	CI01000066_01752509_01757131	-4.09679	1.41375	2.5e-05	0.000507116		gi|1020407014|ref|XP_016120684.1| PREDICTED: selenoprotein O-like isoform X1 [Sinocyclocheilus grahami]	_	_
	CI01000329_00101476_00137501	-4.09679	1.41375	2.5e-05	0.000507116		gi|808868936|gb|KKF19136.1| Potassium voltage-gated channel subfamily C member 1 [Larimichthys crocea]	K04887	biological_process:regulation of ion transmembrane transport(GO:0034765);biological_process:protein homooligomerization(GO:0051260);cellular_component:voltage-gated potassium channel complex(GO:0008076);molecular_function:delayed rectifier potassium channel activity(GO:0005251);biological_process:potassium ion transmembrane transport(GO:0071805)
	CI01000330_03852880_03865462	-2.99391	6.26201	2.54e-05	0.000514092		gi|1025218815|ref|XP_016430815.1| PREDICTED: death-associated protein kinase 2-like isoform X1 [Sinocyclocheilus rhinocerous]	K08803	_
	CI01000056_02069704_02085857	3.33795	2.8686	2.55e-05	0.000516717		gi|1024940105|ref|XP_016335212.1| PREDICTED: NGFI-A-binding protein 2-like isoform X1 [Sinocyclocheilus anshuiensis]	_	_
	CI01000059_07418303_07423995	2.98701	6.45177	2.57e-05	0.000520654		gi|1020492511|ref|XP_016084717.1| PREDICTED: S-adenosylmethionine synthase-like [Sinocyclocheilus grahami]	K00789	molecular_function:methionine adenosyltransferase activity(GO:0004478);molecular_function:metal ion binding(GO:0046872);biological_process:S-adenosylmethionine biosynthetic process(GO:0006556);biological_process:one-carbon metabolic process(GO:0006730);molecular_function:ATP binding(GO:0005524)
	CI01000015_00690873_00738349	-3.0488	4.95196	2.57e-05	0.000520767		gi|1025197581|ref|XP_016425129.1| PREDICTED: potassium voltage-gated channel subfamily H member 1-like [Sinocyclocheilus rhinocerous]	K04904	_
	CI01000054_05579068_05592326	-3.0942	4.18016	2.62e-05	0.000530482		gi|1025328166|ref|XP_016388665.1| PREDICTED: actin-binding protein anillin-like isoform X5 [Sinocyclocheilus rhinocerous]	K18621	_
	CI01000033_01274093_01274303	3.233	3.00475	2.63e-05	0.000531798		gi|57525828|ref|NP_001003571.1| DnaJ (Hsp40) homolog, subfamily B, member 1a [Danio rerio]<>gi|50417181|gb|AAH77119.1| DnaJ (Hsp40) homolog, subfamily B, member 1 [Danio rerio]	K09507	biological_process:protein folding(GO:0006457);molecular_function:unfolded protein binding(GO:0051082)
	CI01000021_02322467_02328819	3.15998	3.69462	2.64e-05	0.000532752		gi|966647308|gb|KTF82218.1| hypothetical protein cypCar_00034728 [Cyprinus carpio]	K17932	_
	CI01000351_01173458_01209354	-3.4769	2.47559	2.64e-05	0.000532998		gi|929096065|ref|XP_014058929.1| PREDICTED: glutamine-rich protein 2-like isoform X1 [Salmo salar]	_	_
	CI01000051_04160061_04160421	3.06798	4.51826	2.65e-05	0.00053431		gi|966714702|gb|KTG46940.1| hypothetical protein cypCar_00013693 [Cyprinus carpio]	_	_
	CI01000013_08418098_08441411	-4.39735	1.16211	2.65e-05	0.00053431			_	_
	CI01000026_11481190_11482991	-4.39735	1.16211	2.65e-05	0.00053431		gi|1025319010|ref|XP_016386194.1| PREDICTED: coiled-coil domain-containing protein 96 [Sinocyclocheilus rhinocerous]	_	_
	CI01000140_01252646_01252984	-4.39735	1.16211	2.65e-05	0.00053431			_	_
	CI01000340_18442700_18467604	-4.39735	1.16211	2.65e-05	0.00053431		gi|688562328|ref|XP_009301043.1| PREDICTED: potassium voltage-gated channel subfamily KQT member 2 isoform X2 [Danio rerio]	K04927	_
	CI01000016_11938043_11946368	-3.07877	4.40923	2.66e-05	0.000535449		gi|1025217304|ref|XP_016430407.1| PREDICTED: circadian-associated transcriptional repressor-like [Sinocyclocheilus rhinocerous]	_	_
	CI01000069_02894136_02894807	-3.0223	5.10532	2.68e-05	0.000538055		gi|1020529606|ref|XP_016104494.1| PREDICTED: cytochrome c oxidase subunit 6A, mitochondrial [Sinocyclocheilus grahami]<>gi|1020529608|ref|XP_016104495.1| PREDICTED: cytochrome c oxidase subunit 6A, mitochondrial [Sinocyclocheilus grahami]	_	cellular_component:mitochondrial respiratory chain complex IV(GO:0005751);molecular_function:cytochrome-c oxidase activity(GO:0004129)
	CI01000229_00348539_00352001	3.16821	3.57014	2.69e-05	0.000540087		gi|966645028|gb|KTF79940.1| hypothetical protein cypCar_00048194 [Cyprinus carpio]	K01940	_
	CI01000009_02247894_02249252	5.23035	0.814257	2.69e-05	0.000540087		gi|1020473495|ref|XP_016141953.1| PREDICTED: granzyme B-like [Sinocyclocheilus grahami]	K01353	_
	CI01000021_00442332_00452538	-5.04077	0.886889	2.69e-05	0.000540087		gi|1020526383|ref|XP_016102780.1| PREDICTED: DNA topoisomerase 1-like isoform X2 [Sinocyclocheilus grahami]	_	_
	CI01000184_00160848_00194048	-5.00611	0.856438	2.69e-05	0.000540087		gi|1024997619|ref|XP_016318201.1| PREDICTED: mucin-2-like [Sinocyclocheilus anshuiensis]	K10955	_
	CI01000242_00034987_00036981	-5.00611	0.856438	2.69e-05	0.000540087		gi|1024996833|ref|XP_016317780.1| PREDICTED: NADPH oxidase 4-like [Sinocyclocheilus anshuiensis]	_	_
	CI01000082_00234503_00271440	-2.97513	6.72719	2.71e-05	0.000541896		gi|1025316559|ref|XP_016385529.1| PREDICTED: traf2 and NCK-interacting protein kinase-like isoform X2 [Sinocyclocheilus rhinocerous]	K08840	_
	CI01000013_08925040_08937556	-3.1389	3.70951	2.71e-05	0.000542571		gi|966660091|gb|KTF94945.1| hypothetical protein cypCar_00020565 [Cyprinus carpio]	K17199	_
	CI01000004_06677179_06740196	-3.06478	4.47827	2.72e-05	0.000543322		gi|1025320313|ref|XP_016386533.1| PREDICTED: thymocyte selection-associated high mobility group box protein TOX-like isoform X2 [Sinocyclocheilus rhinocerous]	_	_
	CI01000321_03212011_03226326	-2.9789	6.3479	2.72e-05	0.000543738		gi|1025167280|ref|XP_016419191.1| PREDICTED: death-associated protein kinase 2-like [Sinocyclocheilus rhinocerous]	K08803	_
	CI01000032_01715692_01725092	2.94978	9.12278	2.73e-05	0.000546265		gi|1025147568|ref|XP_016415962.1| PREDICTED: myosin-3-like [Sinocyclocheilus rhinocerous]	_	_
	CI01000141_00418258_00420104	-3.08997	4.14298	2.74e-05	0.000548077		gi|1020596258|ref|XP_016117162.1| PREDICTED: uncharacterized protein LOC107575268 [Sinocyclocheilus grahami]	_	_
	CI01000027_06785671_06803146	-2.95791	7.69416	2.77e-05	0.000553502		gi|688591192|ref|XP_009290607.1| PREDICTED: nuclear receptor subfamily 4 group A member 3 isoform X1 [Danio rerio]	K08559	_
	CI01000340_02817499_02825652	-3.46569	2.46566	2.81e-05	0.000560959		gi|1025193945|ref|XP_016424150.1| PREDICTED: angiomotin-like 2a [Sinocyclocheilus rhinocerous]	_	_
	CI01000340_18472014_18474890	-7.86517	0.466851	2.82e-05	0.000561026		gi|1024981782|ref|XP_016312568.1| PREDICTED: LOW QUALITY PROTEIN: potassium voltage-gated channel subfamily KQT member 2-like [Sinocyclocheilus anshuiensis]	K04927	_
	CI01000028_02478250_02488503	7.86306	0.369857	2.82e-05	0.000561026		gi|1020406456|ref|XP_016118267.1| PREDICTED: DEP domain-containing protein 7 isoform X1 [Sinocyclocheilus grahami]	_	_
	CI01000054_09652700_09656625	7.86306	0.369857	2.82e-05	0.000561026		gi|1025118385|ref|XP_016349492.1| PREDICTED: ubiquitin-conjugating enzyme E2Q-like protein 1 isoform X4 [Sinocyclocheilus anshuiensis]	K10582	_
	CI01000219_00356816_00360009	7.86306	0.369857	2.82e-05	0.000561026		gi|1025228817|ref|XP_016431695.1| PREDICTED: tetraspanin-1-like [Sinocyclocheilus rhinocerous]	K17357	cellular_component:membrane(GO:0016020)
	CI01000345_01624956_01625588	7.86306	0.369857	2.82e-05	0.000561026		gi|1020474869|ref|XP_016142671.1| PREDICTED: cocaine- and amphetamine-regulated transcript protein-like [Sinocyclocheilus grahami]<>gi|1020484617|ref|XP_016147876.1| PREDICTED: cocaine- and amphetamine-regulated transcript protein-like [Sinocyclocheilus grahami]<>gi|1025223576|ref|XP_016431078.1| PREDICTED: cocaine- and amphetamine-regulated transcript protein-like [Sinocyclocheilus rhinocerous]<…	_	_
	CI01000426_00073729_00086740	7.86306	0.369857	2.82e-05	0.000561026			_	_
	CI01180000_11451121_11459361	7.86306	0.369857	2.82e-05	0.000561026			_	_
	CI01000242_00048189_00052623	-4.073	1.39279	2.84e-05	0.000564514		gi|1025373563|ref|XP_016398491.1| PREDICTED: NADPH oxidase 4-like [Sinocyclocheilus rhinocerous]	_	_
	CI01000030_10103451_10131419	-2.996	5.34036	2.85e-05	0.000566296		gi|1025170823|ref|XP_016419841.1| PREDICTED: muscle M-line assembly protein unc-89-like [Sinocyclocheilus rhinocerous]	_	_
	CI01000059_04479563_04499562	-2.95303	7.33956	2.87e-05	0.000568746		gi|1020472405|ref|XP_016141364.1| PREDICTED: GATS-like protein 2 [Sinocyclocheilus grahami]	_	_
	CI01000069_03986480_03988243	-2.93698	10.0615	2.91e-05	0.000577355		gi|1025368698|ref|XP_016397185.1| PREDICTED: signaling mucin MSB2-like [Sinocyclocheilus rhinocerous]	_	_
	CI01000057_00249540_00251667	-3.1153	3.735	2.92e-05	0.000577773			_	_
	CI01000191_00351053_00353817	-3.8517	1.57289	2.93e-05	0.000579088			_	_
	CI01000020_05320359_05335741	-2.96594	6.1697	2.93e-05	0.000580114		gi|302745152|gb|ADL62679.1| cryptochrome 1a [Phreatichthys andruzzii]	K02295	biological_process:DNA repair(GO:0006281);biological_process:response to light stimulus(GO:0009416);cellular_component:transcription factor complex(GO:0005667);biological_process:entrainment of circadian clock(GO:0009649);molecular_function:DNA photolyase activity(GO:0003913);molecular_function:protein binding(GO:0005515);biological_process:negative regulation of transcription, DNA-templated(GO:0…
	CI01000055_01572679_01573885	3.59363	1.85904	2.95e-05	0.000582998		gi|113678407|ref|NP_001038373.1| ADP-ribosylation factor-like protein 3 [Danio rerio]<>gi|1025098620|ref|XP_016344810.1| PREDICTED: ADP-ribosylation factor-like protein 3 [Sinocyclocheilus anshuiensis]<>gi|1025207416|ref|XP_016427774.1| PREDICTED: ADP-ribosylation factor-like protein 3 [Sinocyclocheilus rhinocerous]<>gi|1025318313|ref|XP_016386004.1| PREDICTED: ADP-ribosylation factor-like protei…	K07944	biological_process:cilium morphogenesis(GO:0060271);molecular_function:microtubule binding(GO:0008017);biological_process:cytokinesis(GO:0000910);biological_process:cell cycle(GO:0007049);biological_process:small GTPase mediated signal transduction(GO:0007264);cellular_component:midbody(GO:0030496);cellular_component:Golgi membrane(GO:0000139);cellular_component:spindle microtubule(GO:0005876);ce…
	CI01000180_01773189_01784141	2.97595	5.80683	2.97e-05	0.000586806		gi|1020506978|ref|XP_016092483.1| PREDICTED: nucleobindin-2-like [Sinocyclocheilus grahami]	_	molecular_function:calcium ion binding(GO:0005509)
	CI01000062_02488009_02560794	3.14198	3.63595	2.97e-05	0.000586806		gi|1025053389|ref|XP_016330974.1| PREDICTED: arf-GAP with SH3 domain, ANK repeat and PH domain-containing protein 2 isoform X1 [Sinocyclocheilus anshuiensis]	K12488	_
	CI01000030_01504763_01508773	-3.16981	3.47966	3.01e-05	0.000593127		gi|966672894|gb|KTG06275.1| hypothetical protein cypCar_00024385 [Cyprinus carpio]	K09068	biological_process:thyroid gland development(GO:0030878);biological_process:angiogenesis(GO:0001525);biological_process:vasculogenesis(GO:0001570);biological_process:artery morphogenesis(GO:0048844);biological_process:definitive hemopoiesis(GO:0060216);biological_process:lateral mesoderm development(GO:0048368);biological_process:regulation of transcription, DNA-templated(GO:0006355);biological_p…
	CI01000033_01040686_01047701	2.99449	5.07961	3.04e-05	0.000599278		gi|1025004281|ref|XP_016321191.1| PREDICTED: meteorin-like protein [Sinocyclocheilus anshuiensis]	_	_
	CI01000306_09013366_09014513	2.98285	5.25949	3.07e-05	0.00060436		gi|961859743|ref|XP_014892221.1| PREDICTED: proteasome subunit alpha type-5 [Poecilia latipinna]<>gi|1025453144|ref|XP_007561337.2| PREDICTED: proteasome subunit alpha type-5 [Poecilia formosa]	K02729	cellular_component:cytoplasm(GO:0005737);cellular_component:proteasome core complex, alpha-subunit complex(GO:0019773);biological_process:ubiquitin-dependent protein catabolic process(GO:0006511);cellular_component:nucleus(GO:0005634);molecular_function:threonine-type endopeptidase activity(GO:0004298)
	CI01000010_01299770_01313065	-3.36514	2.62787	3.08e-05	0.000606471		gi|1025076689|ref|XP_016338835.1| PREDICTED: calphotin-like isoform X2 [Sinocyclocheilus anshuiensis]	_	_
	CI01000300_05852841_05879101	-3.36514	2.62787	3.08e-05	0.000606471		gi|1024941902|ref|XP_016360103.1| PREDICTED: long-chain-fatty-acid--CoA ligase 1-like isoform X1 [Sinocyclocheilus anshuiensis]<>gi|1024941904|ref|XP_016360104.1| PREDICTED: long-chain-fatty-acid--CoA ligase 1-like isoform X1 [Sinocyclocheilus anshuiensis]	K01897	molecular_function:catalytic activity(GO:0003824);biological_process:metabolic process(GO:0008152)
	CI01090678_00000733_00001345	3.34326	2.59962	3.08e-05	0.000606471		gi|1025397606|ref|XP_016407020.1| PREDICTED: nucleobindin-2-like [Sinocyclocheilus rhinocerous]	_	_
	CI01112631_00000320_00000761	-4.36886	1.13706	3.09e-05	0.000606471		gi|51559344|gb|AAU06706.1| immunoglobulin mu heavy chain [Danio rerio]	_	_
	CI01000013_08402498_08414755	-3.20955	3.05394	3.09e-05	0.000607389		gi|213627627|gb|AAI71706.1| Si:dkey-16j24.2 protein [Danio rerio]	K08826	molecular_function:DNA binding(GO:0003677);biological_process:protein phosphorylation(GO:0006468);molecular_function:ATP binding(GO:0005524);biological_process:regulation of melanocyte differentiation(GO:0045634);molecular_function:protein serine/threonine kinase activity(GO:0004674)
	CI01000055_06443549_06446405	2.95425	6.32455	3.1e-05	0.000607855		gi|966649070|gb|KTF83980.1| hypothetical protein cypCar_00018360 [Cyprinus carpio]	K01837	_
	CI01000030_08123594_08127280	-2.943	6.99663	3.11e-05	0.000609905		gi|130485777|ref|NP_001076277.1| PX domain-containing protein kinase-like protein [Danio rerio]	K17543	molecular_function:phosphatidylinositol binding(GO:0035091);molecular_function:actin binding(GO:0003779);molecular_function:protein kinase activity(GO:0004672);biological_process:protein phosphorylation(GO:0006468);molecular_function:ATP binding(GO:0005524);biological_process:cell communication(GO:0007154)
	CI01180000_04417522_04418042	-3.08347	4.03203	3.12e-05	0.000610982		gi|966707895|gb|KTG40135.1| hypothetical protein cypCar_00009606, partial [Cyprinus carpio]	K13862	_
	CI01000018_00791508_00801917	2.92685	8.59281	3.12e-05	0.000611307		gi|966650764|gb|KTF85666.1| hypothetical protein cypCar_00026446 [Cyprinus carpio]	K14010	_
	CI01000010_06253230_06263855	-2.93531	7.42213	3.14e-05	0.000613955		gi|1025206609|ref|XP_016427557.1| PREDICTED: LON peptidase N-terminal domain and RING finger protein 1-like [Sinocyclocheilus rhinocerous]	_	molecular_function:ATP-dependent peptidase activity(GO:0004176);biological_process:proteolysis(GO:0006508);molecular_function:zinc ion binding(GO:0008270)
	CI01000115_00617057_00631791	-3.06845	4.28384	3.14e-05	0.00061424		gi|1025273534|ref|XP_016375260.1| PREDICTED: SNF-related serine/threonine-protein kinase-like [Sinocyclocheilus rhinocerous]<>gi|1025273538|ref|XP_016375261.1| PREDICTED: SNF-related serine/threonine-protein kinase-like [Sinocyclocheilus rhinocerous]	K08802	_
	CI01000367_00131770_00138127	-3.029	4.49847	3.15e-05	0.000616712		gi|1025386396|ref|XP_016401954.1| PREDICTED: cytohesin-interacting protein-like [Sinocyclocheilus rhinocerous]	_	_
	CI01000001_05594766_05595939	3.16121	3.25755	3.16e-05	0.000617577		gi|966710697|gb|KTG42935.1| hypothetical protein cypCar_00000509 [Cyprinus carpio]	_	_
	CI01000059_02758893_02769292	-2.98427	5.25871	3.18e-05	0.000621999		gi|1024977565|ref|XP_016310315.1| PREDICTED: sugar phosphate exchanger 2 [Sinocyclocheilus anshuiensis]	K13783	cellular_component:integral component of membrane(GO:0016021);biological_process:transmembrane transport(GO:0055085);molecular_function:transporter activity(GO:0005215);biological_process:carbohydrate transport(GO:0008643)
	CI01000000_12182460_12189353	2.93737	6.93903	3.19e-05	0.000622172		gi|1024977697|ref|XP_016310389.1| PREDICTED: chloride intracellular channel protein 2-like [Sinocyclocheilus anshuiensis]	K05022	_
	CI01000356_00365892_00382964	-3.73135	2.00614	3.19e-05	0.000622916		gi|1024990205|ref|XP_016315199.1| PREDICTED: NACHT, LRR and PYD domains-containing protein 3-like [Sinocyclocheilus anshuiensis]	K12800	_
	CI01000069_04985959_04986408	-3.44299	2.44557	3.2e-05	0.000623112		gi|33604220|gb|AAH56302.1| Ighm protein [Danio rerio]	_	cellular_component:integral component of membrane(GO:0016021)
	CI01000010_02094715_02126321	-2.93612	7.09755	3.21e-05	0.000626187		gi|1025143707|ref|XP_016415254.1| PREDICTED: inositol 1,4,5-trisphosphate receptor type 3-like [Sinocyclocheilus rhinocerous]	K04960	_
	CI01000000_15934482_15962471	-2.94863	6.1544	3.23e-05	0.0006284		gi|1020528641|ref|XP_016103981.1| PREDICTED: arf-GAP with Rho-GAP domain, ANK repeat and PH domain-containing protein 3-like [Sinocyclocheilus grahami]	K12490	_
	CI01000012_07136101_07161117	2.9303	7.38939	3.23e-05	0.0006284		gi|1025032830|ref|XP_016325421.1| PREDICTED: ribosome-binding protein 1-like isoform X1 [Sinocyclocheilus anshuiensis]	K14000	_
	CI01000050_00786890_00789088	5.19095	0.778772	3.23e-05	0.0006284		gi|1025299040|ref|XP_016380733.1| PREDICTED: matrix metalloproteinase-23-like isoform X1 [Sinocyclocheilus rhinocerous]	K08001	_
	CI01000013_08095012_08097899	3.12491	3.62076	3.24e-05	0.000628948		gi|1020422140|ref|XP_016130139.1| PREDICTED: protein C19orf12 homolog [Sinocyclocheilus grahami]	_	_
	CI01095562_00002216_00002720	-3.84228	1.86013	3.24e-05	0.000628948		gi|966646327|gb|KTF81239.1| hypothetical protein cypCar_00041518 [Cyprinus carpio]	_	_
	CI01000300_10074725_10078309	3.57429	1.8418	3.24e-05	0.000628948			_	_
	CI01000063_05490285_05556254	-4.04881	1.37151	3.24e-05	0.000629007		gi|528496153|ref|XP_005156350.1| PREDICTED: protein kinase C epsilon type isoform X1 [Danio rerio]	K18050	_
	CI01000070_00857832_00889186	-3.05887	4.27537	3.26e-05	0.000631756		gi|1025409044|ref|XP_016410097.1| PREDICTED: deleted in autism protein 1 homolog [Sinocyclocheilus rhinocerous]	_	_
	CI01000004_06497733_06501592	-2.94926	6.19288	3.28e-05	0.000636211		gi|1020395346|ref|XP_016128274.1| PREDICTED: volume-regulated anion channel subunit LRRC8D-like [Sinocyclocheilus grahami]	_	_
	CI01000057_02248495_02254279	4.0353	1.49606	3.28e-05	0.00063625		gi|318037331|ref|NP_001188113.1| ubiquitin-conjugating enzyme E2 J2 [Ictalurus punctatus]<>gi|308322819|gb|ADO28547.1| ubiquitin-conjugating enzyme e2 j2 [Ictalurus punctatus]	_	molecular_function:ubiquitin-protein transferase activity(GO:0004842);biological_process:protein ubiquitination(GO:0016567)
	CI01000026_15453381_15456567	-3.00833	4.73607	3.33e-05	0.000644125		gi|966715283|gb|KTG47521.1| hypothetical protein cypCar_00022100 [Cyprinus carpio]	_	_
	CI01000095_02409472_02411189	2.92052	7.85013	3.34e-05	0.000646269		gi|1025221063|ref|XP_016424370.1| PREDICTED: tumor necrosis factor-like [Sinocyclocheilus rhinocerous]	_	_
	CI01000004_16490931_16555397	-2.94934	5.97521	3.37e-05	0.000651167		gi|960139411|ref|NP_001304694.1| leucine-rich repeat-containing protein 16B [Danio rerio]<>gi|937655706|gb|ALI93831.1| CARMIL3 [Danio rerio]	_	_
	CI01000313_01771461_01775597	3.02746	4.26495	3.38e-05	0.000653355		gi|966659955|gb|KTF94809.1| hypothetical protein cypCar_00000534 [Cyprinus carpio]	_	_
	CI01000299_02696797_02704180	-2.91758	7.79295	3.4e-05	0.000656868		gi|41152353|ref|NP_956985.1| tubulin alpha-4A chain [Danio rerio]<>gi|1025024365|ref|XP_016323352.1| PREDICTED: tubulin alpha chain-like [Sinocyclocheilus anshuiensis]<>gi|37590315|gb|AAH59428.1| Tubulin, alpha 8 like 2 [Danio rerio]	K07374	cellular_component:microtubule(GO:0005874);biological_process:protein polymerization(GO:0051258);;biological_process:microtubule-based process(GO:0007017);molecular_function:GTPase activity(GO:0003924);molecular_function:structural constituent of cytoskeleton(GO:0005200);cellular_component:cytoplasm(GO:0005737);molecular_function:GTP binding(GO:0005525)
	CI01000225_00425270_00431446	-3.12458	3.54816	3.43e-05	0.000661344		gi|1020418844|ref|XP_016128390.1| PREDICTED: 2-phosphoxylose phosphatase 1-like isoform X2 [Sinocyclocheilus grahami]	_	_
	CI01000074_00100688_00108795	3.06293	3.91027	3.44e-05	0.000663779		gi|1025271613|ref|XP_016374744.1| PREDICTED: leucine-rich repeat-containing protein 24-like [Sinocyclocheilus rhinocerous]<>gi|1025271617|ref|XP_016374745.1| PREDICTED: leucine-rich repeat-containing protein 24-like [Sinocyclocheilus rhinocerous]	_	_
	CI01000051_03800655_03819155	-2.93123	6.62396	3.45e-05	0.000663994		gi|1025316321|ref|XP_016385461.1| PREDICTED: protein zyg-11 homolog [Sinocyclocheilus rhinocerous]	K10350	_
	CI01000034_05795972_05811363	-2.94538	5.97172	3.45e-05	0.000663994		gi|966656752|gb|KTF91606.1| hypothetical protein cypCar_00033525 [Cyprinus carpio]	K08804	biological_process:protein phosphorylation(GO:0006468);molecular_function:ATP binding(GO:0005524);molecular_function:protein serine/threonine kinase activity(GO:0004674)
	CI01000021_00634346_00653628	-2.97106	5.0766	3.48e-05	0.000669132		gi|528517254|ref|XP_001922963.4| PREDICTED: sodium- and chloride-dependent creatine transporter 1-like isoform X1 [Danio rerio]	K05039	_
	CI01000319_05796587_05803719	2.98013	4.96149	3.5e-05	0.000673422		gi|1020591333|ref|XP_016116205.1| PREDICTED: antigen peptide transporter 2-like [Sinocyclocheilus grahami]	K05654	biological_process:transmembrane transport(GO:0055085);cellular_component:integral component of membrane(GO:0016021);molecular_function:ATPase activity, coupled to transmembrane movement of substances(GO:0042626);biological_process:peptide transport(GO:0015833);molecular_function:ATP binding(GO:0005524);molecular_function:peptide transporter activity(GO:0015197)
	CI01000015_08109799_08157297	-3.02425	4.21425	3.51e-05	0.000675438		gi|966703153|gb|KTG35394.1| hypothetical protein cypCar_00029291 [Cyprinus carpio]	_	_
	CI01000304_11570457_11574856	2.95282	5.46736	3.53e-05	0.000678034		gi|1025301507|ref|XP_016381418.1| PREDICTED: cysteine and histidine-rich domain-containing protein 1 [Sinocyclocheilus rhinocerous]	K16729	biological_process:regulation of centrosome duplication(GO:0010824)
	CI01000368_00218735_00232118	-3.0996	3.62694	3.53e-05	0.000678034		gi|1020528707|ref|XP_016104018.1| PREDICTED: uncharacterized protein LOC107563623 [Sinocyclocheilus grahami]	_	_
	CI01000301_01336696_01344976	2.99469	4.77357	3.53e-05	0.000678034		gi|125804511|ref|XP_686737.2| PREDICTED: sprouty-related, EVH1 domain-containing protein 2 [Danio rerio]	K04703	_
	CI01000110_03059951_03081333	-3.13601	3.44982	3.53e-05	0.000678034		gi|1024945632|ref|XP_016361856.1| PREDICTED: uncharacterized protein KIAA1211-like isoform X2 [Sinocyclocheilus anshuiensis]	_	_
	CI01000053_04668583_04699797	-3.0349	4.12779	3.55e-05	0.000681087		gi|1025067416|ref|XP_016336266.1| PREDICTED: zinc finger CCCH domain-containing protein 13-like [Sinocyclocheilus anshuiensis]<>gi|1025067420|ref|XP_016336267.1| PREDICTED: zinc finger CCCH domain-containing protein 13-like [Sinocyclocheilus anshuiensis]	_	_
	CI01000051_07938052_07941645	-3.82503	1.84483	3.56e-05	0.000681169		gi|966652980|gb|KTF87882.1| hypothetical protein cypCar_00001634 [Cyprinus carpio]	_	_
	CI01000013_07036369_07042930	2.95738	5.31137	3.56e-05	0.000681169		gi|1020505728|ref|XP_016091811.1| PREDICTED: traB domain-containing protein isoform X1 [Sinocyclocheilus grahami]<>gi|1020505730|ref|XP_016091812.1| PREDICTED: traB domain-containing protein isoform X1 [Sinocyclocheilus grahami]<>gi|1020505736|ref|XP_016091816.1| PREDICTED: traB domain-containing protein isoform X4 [Sinocyclocheilus grahami]	_	_
	CI01000000_05619374_05619661	-7.81807	0.425766	3.57e-05	0.000681169			_	_
	CI01000010_08341936_08349855	-7.81807	0.425766	3.57e-05	0.000681169		gi|1025415073|ref|XP_016411743.1| PREDICTED: vacuolar fusion protein MON1 homolog B-like [Sinocyclocheilus rhinocerous]	_	_
	CI01000059_08640558_08653639	-7.81807	0.425766	3.57e-05	0.000681169		gi|51571925|ref|NP_001003993.1| adenylate kinase isoenzyme 1 [Danio rerio]<>gi|528481229|ref|XP_005168740.1| PREDICTED: adenylate kinase isoenzyme 1 isoform X2 [Danio rerio]<>gi|688558208|ref|XP_009300331.1| PREDICTED: adenylate kinase isoenzyme 1 isoform X2 [Danio rerio]<>gi|1040689799|ref|XP_017211559.1| PREDICTED: adenylate kinase isoenzyme 1 isoform X2 [Danio rerio]<>gi|51327295|gb|AAH80261.1…	K00939	molecular_function:adenylate kinase activity(GO:0004017);biological_process:ATP metabolic process(GO:0046034);molecular_function:ATP binding(GO:0005524);biological_process:phosphorylation(GO:0016310);cellular_component:cytoplasm(GO:0005737)
	CI01000055_00589947_00613858	7.80885	0.321623	3.57e-05	0.000681169		gi|1025207267|ref|XP_016427731.1| PREDICTED: serine/threonine-protein kinase LMTK1-like isoform X1 [Sinocyclocheilus rhinocerous]	K17480	_
	CI01034671_00001167_00001898	7.80885	0.321623	3.57e-05	0.000681169		gi|1025320835|ref|XP_016386677.1| PREDICTED: solute carrier family 2, facilitated glucose transporter member 9 [Sinocyclocheilus rhinocerous]<>gi|1025320839|ref|XP_016386678.1| PREDICTED: solute carrier family 2, facilitated glucose transporter member 9 [Sinocyclocheilus rhinocerous]<>gi|1025320843|ref|XP_016386679.1| PREDICTED: solute carrier family 2, facilitated glucose transporter member 9 [S…	_	_
	CI01000306_01293889_01308316	-2.911	7.66332	3.57e-05	0.000681169		gi|1040658873|ref|XP_009304586.2| PREDICTED: spectrin beta chain, non-erythrocytic 1, partial [Danio rerio]	K06115	_
	CI01000043_01970557_01977108	-3.53863	2.22501	3.59e-05	0.000683221		gi|1025111635|ref|XP_016408708.1| PREDICTED: synaptopodin-2-like isoform X1 [Sinocyclocheilus rhinocerous]<>gi|1025111641|ref|XP_016408771.1| PREDICTED: synaptopodin-2-like isoform X2 [Sinocyclocheilus rhinocerous]	_	_
	CI01000395_00113987_00123318	3.42774	2.2042	3.59e-05	0.000683221		gi|1020562796|ref|XP_016112022.1| PREDICTED: reticulon-4-like isoform X1 [Sinocyclocheilus grahami]	_	_
	CI01000082_02716435_02737089	3.11073	3.56426	3.59e-05	0.000683221		gi|1025395665|ref|XP_016406490.1| PREDICTED: UDP-N-acetylglucosamine transferase subunit ALG14 homolog [Sinocyclocheilus rhinocerous]	K07441	_
	CI01000063_02212324_02222103	2.99108	4.65842	3.59e-05	0.000683549		gi|966699548|gb|KTG31789.1| hypothetical protein cypCar_00032453 [Cyprinus carpio]	_	_
	CI01000066_00512961_00520396	4.53411	1.03901	3.6e-05	0.000683549		gi|1020407190|ref|XP_016121459.1| PREDICTED: ELKS/Rab6-interacting/CAST family member 1-like isoform X3 [Sinocyclocheilus grahami]	K16072	_
	CI01000304_06613743_06629298	4.53411	1.03901	3.6e-05	0.000683549		gi|1020526273|ref|XP_016102721.1| PREDICTED: inositol polyphosphate 5-phosphatase K-like [Sinocyclocheilus grahami]	K01106	_
	CI01000304_03261474_03267659	-4.33979	1.11156	3.6e-05	0.000683549		gi|1025219786|ref|XP_016420972.1| PREDICTED: ras association domain-containing protein 6-like isoform X2 [Sinocyclocheilus rhinocerous]	K09854	_
	CI01152161_00000005_00000255	-4.33979	1.11156	3.6e-05	0.000683549		gi|1020469517|ref|XP_016139818.1| PREDICTED: B-cell receptor CD22-like [Sinocyclocheilus grahami]	_	_
	CI01000054_08378811_08396034	-2.90895	7.6295	3.61e-05	0.000685193		gi|1025251152|ref|XP_016369214.1| PREDICTED: serine/threonine-protein phosphatase 1 regulatory subunit 10-like [Sinocyclocheilus rhinocerous]<>gi|1025251156|ref|XP_016369216.1| PREDICTED: serine/threonine-protein phosphatase 1 regulatory subunit 10-like [Sinocyclocheilus rhinocerous]	K17552	_
	CI01000304_16874485_16876468	-3.41993	2.42521	3.64e-05	0.000690414		gi|326671316|ref|XP_695751.4| PREDICTED: proline-rich protein 11 isoform X1 [Danio rerio]	_	_
	CI01000340_05177681_05192437	2.96148	5.07915	3.64e-05	0.000691197		gi|1025372770|ref|XP_016398280.1| PREDICTED: dolichyl pyrophosphate Man9GlcNAc2 alpha-1,3-glucosyltransferase [Sinocyclocheilus rhinocerous]	K03848	_
	CI01000026_02230639_02246622	-2.9431	5.6922	3.66e-05	0.000694594		gi|1025180981|ref|XP_016421524.1| PREDICTED: arachidonate 5-lipoxygenase-like [Sinocyclocheilus rhinocerous]	K00458	_
	CI01000320_03639518_03642111	3.16306	3.01169	3.68e-05	0.00069645		gi|153792331|ref|NP_001093546.1| NF-kappa-B inhibitor-interacting Ras-like protein 1 [Danio rerio]<>gi|229676052|sp|Q6DGQ1.2|KBRS1_DANRE RecName: Full=NF-kappa-B inhibitor-interacting Ras-like protein 1; AltName: Full=I-kappa-B-interacting Ras-like protein 1; Short=Kappa B-Ras protein 1; Short=KappaB-Ras1	K17197	biological_process:small GTPase mediated signal transduction(GO:0007264);;molecular_function:GTPase activity(GO:0003924);cellular_component:cytoplasm(GO:0005737);cellular_component:membrane(GO:0016020);molecular_function:GTP binding(GO:0005525)
	CI01000069_04171520_04172634	-2.98699	4.73841	3.68e-05	0.000697037		gi|1025389770|ref|XP_016404885.1| PREDICTED: PR domain zinc finger protein 1-like [Sinocyclocheilus rhinocerous]	_	molecular_function:binding(GO:0005488)
	CI01000081_00036237_00048055	-3.80872	1.53517	3.69e-05	0.000697578		gi|1024979356|ref|XP_016311270.1| PREDICTED: ubiquitin carboxyl-terminal hydrolase 2-like isoform X2 [Sinocyclocheilus anshuiensis]	K11833	_
	CI01000422_00059759_00061263	-3.80872	1.53517	3.69e-05	0.000697578		gi|939308497|ref|XP_014269094.1| PREDICTED: uncharacterized protein LOC101468412 [Maylandia zebra]	K11252	_
	CI01000140_01254245_01256233	-2.91961	6.40746	3.69e-05	0.000697578		gi|1025195843|ref|XP_016424671.1| PREDICTED: CCAAT/enhancer-binding protein beta-like [Sinocyclocheilus rhinocerous]	K10050	_
	CI01000019_02648669_02658933	2.92225	6.17147	3.7e-05	0.000697578		gi|1025348626|ref|XP_016394190.1| PREDICTED: USP6 N-terminal-like protein isoform X1 [Sinocyclocheilus rhinocerous]<>gi|1025348630|ref|XP_016394191.1| PREDICTED: USP6 N-terminal-like protein isoform X2 [Sinocyclocheilus rhinocerous]	_	_
	CI01000228_00002917_00006024	4.22511	1.28538	3.7e-05	0.000697578		gi|1024984729|ref|XP_016314126.1| PREDICTED: zinc transporter ZIP8-like [Sinocyclocheilus anshuiensis]	K14714	_
	CI01000010_00601570_00615159	-4.0242	1.34991	3.7e-05	0.000697578		gi|1020496140|ref|XP_016086684.1| PREDICTED: IQ motif and SEC7 domain-containing protein 2-like isoform X1 [Sinocyclocheilus grahami]	K12495	_
	CI01000030_01514203_01515696	-4.0242	1.34991	3.7e-05	0.000697578		gi|1024996674|ref|XP_016317692.1| PREDICTED: PDZK1-interacting protein 1 [Sinocyclocheilus anshuiensis]	_	biological_process:hemopoiesis(GO:0030097)
	CI01000339_05414625_05415394	-4.0242	1.34991	3.7e-05	0.000697578		gi|966706288|gb|KTG38529.1| hypothetical protein cypCar_00003012 [Cyprinus carpio]	_	_
	CI01000010_00393562_00396269	2.94675	5.21479	3.73e-05	0.000702498		gi|1024994586|ref|XP_016316947.1| PREDICTED: tumor necrosis factor receptor superfamily member 5-like [Sinocyclocheilus anshuiensis]<>gi|1024994588|ref|XP_016316948.1| PREDICTED: tumor necrosis factor receptor superfamily member 5-like [Sinocyclocheilus anshuiensis]<>gi|1024994591|ref|XP_016316949.1| PREDICTED: tumor necrosis factor receptor superfamily member 5-like [Sinocyclocheilus anshuiensis]	_	_
	CI01159237_00001645_00002439	-2.97494	4.94204	3.73e-05	0.000702642		gi|966713439|gb|KTG45677.1| hypothetical protein cypCar_00000665 [Cyprinus carpio]	K03231	cellular_component:cytoplasm(GO:0005737);molecular_function:translation elongation factor activity(GO:0003746);molecular_function:GTP binding(GO:0005525);biological_process:translational elongation(GO:0006414);molecular_function:GTPase activity(GO:0003924)
[truncated: 31,029 more rows]

## Sheet: Sheet1
Table S1: The transcriptome was screened for the identification of the changes in CD molecule.
Gene	Gene_id	Length	RPKM			logFC
[truncated: 27 more rows]
